# Supplementary material for: RUNX1, a transcription factor mutated in breast cancer, controls the fate of ER-positive mammary luminal cells
Source: eLife journal article supplement (doi:10.7554/elife.03881), 2014-11-21
Supplement: supp [file elife-03881-supp-v1.zip]

Archive with 13 entries (13 files):
- elife_poa_e03881_Figure_4_source_data_2.xlsx
- elife_poa_e03881_Figure_7_figure_supplement_1.pdf
- elife_poa_e03881_Figure_4_source_data_1.xlsx
- elife_poa_e03881_Figure_6_source_data_1.xlsx
- elife_poa_e03881_Figure_5_figure_supplement_1.pdf
- elife_poa_e03881_Figure_1_figure_supplement_1.pdf
- elife_poa_e03881_Supplementary_File_1.xlsx
- elife_poa_e03881_Figure_3_figure_supplement_1.pdf
- elife_poa_e03881_Figure_4_figure_supplement_1.pdf
- elife_poa_e03881_Figure_6_figure_supplement_1.pdf
- elife_poa_e03881_Figure_7_figure_supplement_2.pdf
- elife_poa_e03881_Figure_4_source_data_3.xlsx
- elife_poa_e03881_Figure_6_figure_supplement_2.pdf
