# Supplementary material for: RUNX1, a transcription factor mutated in breast cancer, controls the fate of ER-positive mammary luminal cells
Source: eLife journal article supplement (doi:10.7554/elife.03881), 2014-11-21
Supplement: supp [file elife-03881-supp-v1.zip]

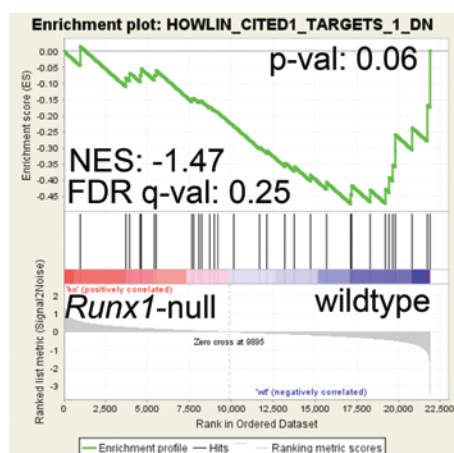

| Runx1-null | wildtype | Sample Name |
|------------|----------|-------------|
|            |          | TEFC        |
|            |          | CRYAB       |
|            |          | ANGEL2      |
|            |          | ATP1A2      |
|            |          | IER5        |
|            |          | PAD51AP1    |
|            |          | ENF14       |
|            |          | HIF1A       |
|            |          | SERINC1     |
|            |          | JAK1        |
|            |          | AMACP       |
|            |          | SLC25A24    |
|            |          | SYT13       |
|            |          | HGF         |
|            |          | HAP1        |
|            |          | VPS53       |
|            |          | LIN7C       |
|            |          | SC5D1       |
|            |          | BTRD1       |
|            |          | GALC        |
|            |          | NR1D2       |
|            |          | PAB6B       |
|            |          | ARCB7       |
|            |          | CAP1        |
|            |          | TMEM30B     |
|            |          | MPP5        |
|            |          | CDH11       |
|            |          | ASPH        |
|            |          | AP          |
|            |          | TRIM34      |
|            |          | CITED1      |
|            |          | PDGFR       |

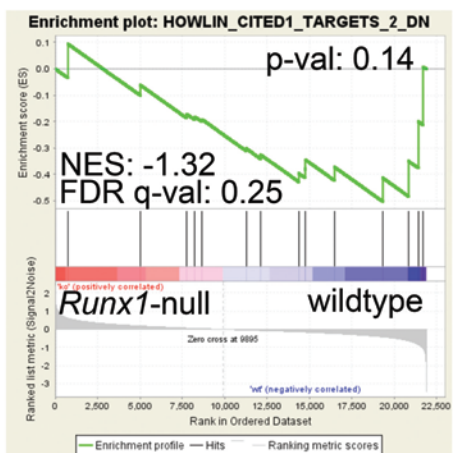

| Runx1-null | wildtype | Sample Name |
|------------|----------|-------------|
|            |          | BID         |
|            |          | PRKCDRP     |
|            |          | TMEM45B     |
|            |          | AMACP       |
|            |          | STC2        |
|            |          | VAMP3       |
|            |          | ETF1        |
|            |          | EGG         |
|            |          | GALC        |
|            |          | SLC41A2     |
|            |          | BPGM        |
|            |          | SORL1       |
|            |          | TRIM34      |
|            |          | CHPDL1      |
|            |          | CITED1      |
