# Supplementary material for: RUNX1, a transcription factor mutated in breast cancer, controls the fate of ER-positive mammary luminal cells
Source: eLife journal article supplement (doi:10.7554/elife.03881), 2014-11-21

**A*****MMTV-Cre;Runx1<sup>+/+</sup>;Trp53<sup>L/L</sup>***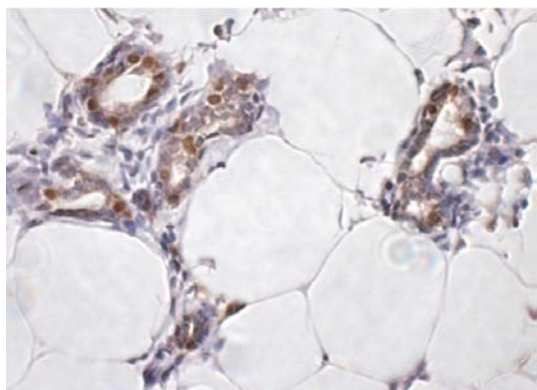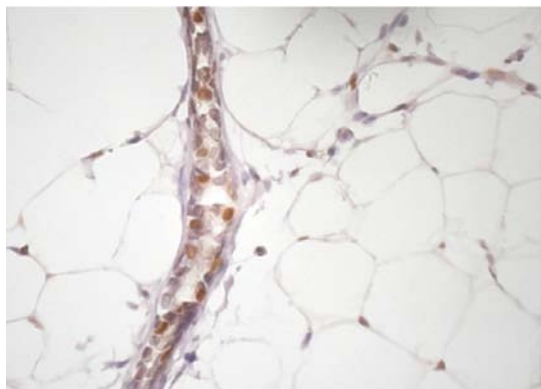***MMTV-Cre;Runx1<sup>L/L</sup>;Trp53<sup>L/L</sup>***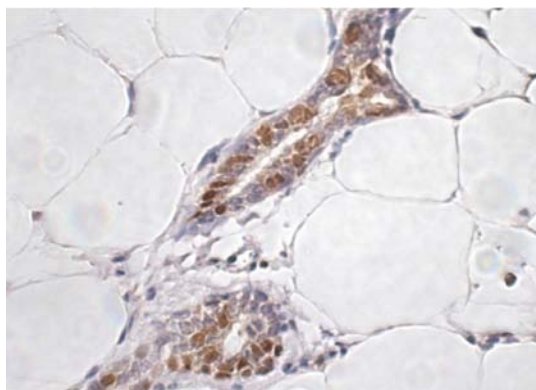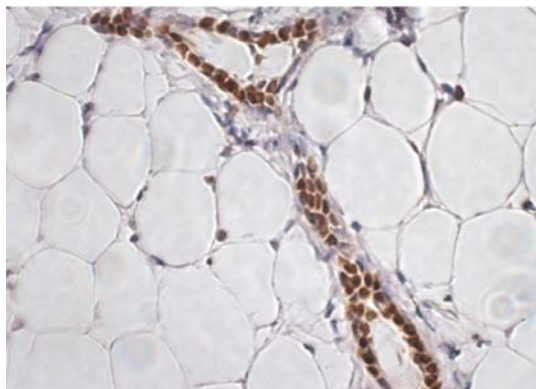**B*****MMTV-Cre;Runx1<sup>+/+</sup>;Rb1<sup>L/L</sup>***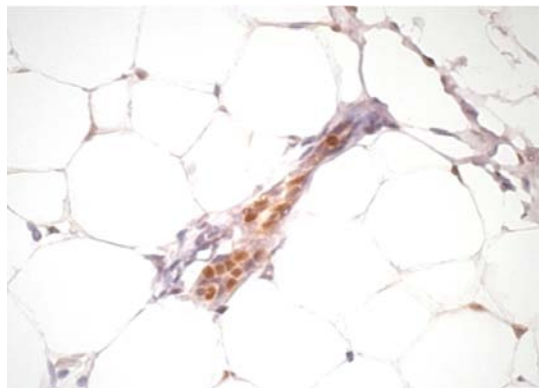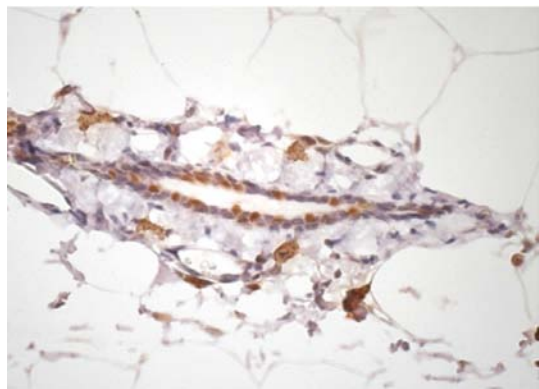***MMTV-Cre;Runx1<sup>L/L</sup>;Rb1<sup>L/L</sup>***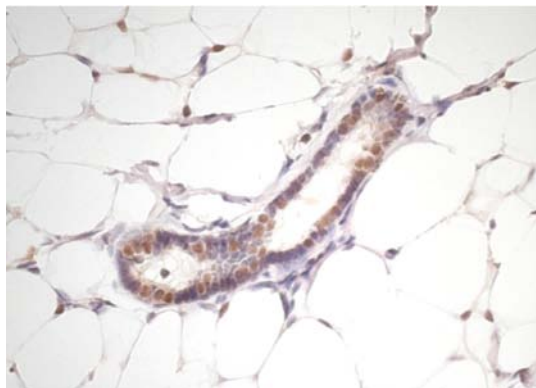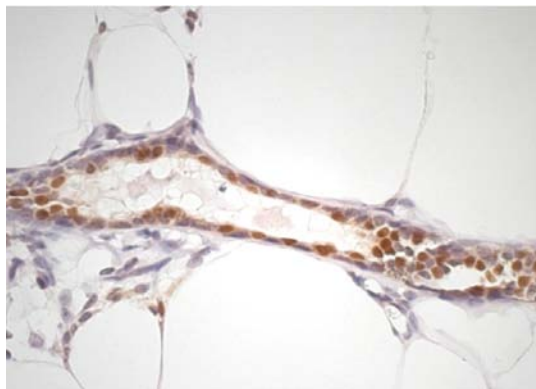

Supplement: supp [file elife-03881-supp-v1.zip › elife_poa_e03881_Figure_5_figure_supplement_1.pdf]
