# Supplementary material for: RUNX1, a transcription factor mutated in breast cancer, controls the fate of ER-positive mammary luminal cells
Source: eLife journal article supplement (doi:10.7554/elife.03881), 2014-11-21
Supplement: supp [file elife-03881-supp-v1.zip › elife_poa_e03881_Supplementary_File_1.xlsx]

## Sheet: Sheet1
Supplementary File 1. Primers and shRNAs used in this study (All sequences from 5’ to 3’)
quantitative RT-PCR
gene	species	primer sequence
Runx1-FW	mus musculus	acctaccatagagccatcaaaatc
Runx1-RV	mus musculus	ttggtctgatcatctagtttctgc
Runx2-FW	mus musculus	acgccgctgtcttccacacg
Runx2-RV	mus musculus	tgaagcacctgcctggctct
Runx3-FW	mus musculus	cgattcgtgggccgcagtgg
Runx3-RV	mus musculus	tatcttctgccggtgccgtcg
Cbfb-FW	mus musculus	gagcgagcccagcaggaagatg
Cbfb-RV	mus musculus	aaccaggactagggtcttgctgt
Gata3-FW	mus musculus	agaggtatcctccgacccac
Gata3-RV	mus musculus	atgaagccggagggtaaacg
Elf5-FW	mus musculus	gggtgatgttggactccgtaa
Elf5-RV	mus musculus	ttggagccattcccagacat
Foxa1-FW	mus musculus	gctccaggatgttagggactg
Foxa1-RV	mus musculus	ccaggccggagttcatgttg
Cited1-FW	mus musculus	tctgggaaggaggatgccaa
Cited-RV	mus musculus	atgcaggttgaaggatgggg
Esr1-FW	mus musculus	agctgtctcctttcctgcac
Esr1-RV	mus musculus	gtctctctcggccattctgg
ChIP analysis
CITED1-FW	homo sapiens	ctatatggcagcggtggctc
CITED1-RV	homo sapiens	ttttcggcgagcctagtgag
CITED1(2)-FW	homo sapiens	tgggttcgagggtttctgtt
CITED1(2)-RV	homo sapiens	acaacctgacatcgtgggaa
non-specific-FW	homo sapiens	gaacccttttctcaggcaaa
non-specific-RV	homo sapiens	taccttccacaccacgttga
ELF5-ECR1-FW	homo sapiens	acattggttagaagctgcctg
ELF5-ECR1-RV	homo sapiens	gccacatcaatatcatccatgc
ELF5-ECR2-FW	homo sapiens	tctgtggtgagtggctgaag
ELF5-ECR2-RV	homo sapiens	caaatattgccctccctctcc
ELF5-ECR3-FW	homo sapiens	acacagacagttgaacatgttaa
ELF5-ECR3-RV	homo sapiens	tgaatcgctgtacaggctga
ESR1-1.4-FW	homo sapiens	agctgtcctattttgagaactgt
ESR1-1.4-RV	homo sapiens	catgtatactaacgcattgtggg
FOXA1-1.4-FW	homo sapiens	ggagatggtgcgtgtgtttt
FOXA1-1.4-RV	homo sapiens	cctagtggttctacaggcagt
FOXA1-1.6-FW	homo sapiens	tgagtgtctgtgaccatgtgt
FOXA1-1.6-RV	homo sapiens	gctcccctgctgacttaaga
FOXA1-1.9-FW	homo sapiens	aactcagtagggcaggaacc
FOXA1-1.9-RV	homo sapiens	atcaggcccaggaagctaag
shRNAs for RUNX1
TRCN0000013659-D1	homo sapiens	CCGGCCTACGATCAGTCCTACCAATCTCGAGATTGGTAGGACTGATCGTAGGTTTTT
TRCN0000013660-D2	homo sapiens	CCGGCCTCGAAGACATCGGCAGAAACTCGAGTTTCTGCCGATGTCTTCGAGGTTTTT
TRCN0000013662-D4	homo sapiens	CCGGCACAGTGCTTCATGAGAGAATCTCGAGATTCTCTCATGAAGCACTGTGTTTTT
