# Supplementary material for: RUNX1, a transcription factor mutated in breast cancer, controls the fate of ER-positive mammary luminal cells
Source: eLife journal article supplement (doi:10.7554/elife.03881), 2014-11-21
Supplement: supp [file elife_poa_e03881_Figure_4_source_data_1.xlsx]

## Sheet: gsea_report_for_ko_135325433897
Figure 4-Source data 1: Gene sets from the MSigDB database C2-CGP (chemical and genetic perturbations, v3.1) enriched in Runx1-null luminal cells
Enrichment scores with FDR q-val≤0.25 are significant in GSEA, based on Subramanian et al. PNAS 2005
NAME	SIZE	ES	NES	NOM p-val	FDR q-val	FWER p-val	RANK AT MAX	LEADING EDGE
KRIGE_AMINO_ACID_DEPRIVATION	26	0.747617	2.48708	0	0	0	2814	tags=54%, list=13%, signal=62%
MANALO_HYPOXIA_DN	227	0.460304	2.26129	0	0.00439006	0.007	6117	tags=52%, list=28%, signal=72%
LEE_BMP2_TARGETS_DN	680	0.40621	2.17921	0	0.00798945	0.02	5974	tags=48%, list=27%, signal=64%
SCHUHMACHER_MYC_TARGETS_UP	69	0.529947	2.17556	0	0.00651796	0.022	3501	tags=43%, list=16%, signal=52%
ABE_VEGFA_TARGETS_2HR	29	0.637524	2.14882	0	0.00759172	0.032	4274	tags=59%, list=20%, signal=73%
CHAUHAN_RESPONSE_TO_METHOXYESTRADIOL_UP	43	0.530784	1.98832	0	0.0622567	0.292	4795	tags=49%, list=22%, signal=62%
WELCSH_BRCA1_TARGETS_DN	113	0.43334	1.94151	0	0.099951	0.466	5191	tags=47%, list=24%, signal=61%
GARGALOVIC_RESPONSE_TO_OXIDIZED_PHOSPHOLIPIDS_RED_UP	15	0.680186	1.93488	0.00255102	0.0970377	0.505	3498	tags=60%, list=16%, signal=71%
RAMJAUN_APOPTOSIS_BY_TGFB1_VIA_MAPK1_DN	8	0.846437	1.93367	0.00225734	0.0877041	0.512	951	tags=63%, list=4%, signal=65%
ZHANG_TLX_TARGETS_60HR_DN	221	0.389967	1.927	0	0.0848832	0.541	6465	tags=45%, list=30%, signal=63%
MEISSNER_NPC_ICP_WITH_H3_UNMETHYLATED	15	0.674234	1.92023	0	0.0844681	0.576	1541	tags=40%, list=7%, signal=43%
ZAMORA_NOS2_TARGETS_UP	56	0.488113	1.90595	0	0.091219	0.642	4679	tags=34%, list=21%, signal=43%
PENG_GLUTAMINE_DEPRIVATION_DN	272	0.380864	1.89364	0	0.0977846	0.702	5564	tags=39%, list=25%, signal=51%
MOREAUX_B_LYMPHOCYTE_MATURATION_BY_TACI_DN	51	0.494563	1.89196	0	0.0925905	0.707	5367	tags=43%, list=25%, signal=57%
SAGIV_CD24_TARGETS_DN	37	0.529195	1.89059	0.00283286	0.0874332	0.709	3473	tags=35%, list=16%, signal=42%
AMUNDSON_DNA_DAMAGE_RESPONSE_TP53	15	0.664325	1.88686	0.00241546	0.0850828	0.72	2267	tags=40%, list=10%, signal=45%
SCIAN_CELL_CYCLE_TARGETS_OF_TP53_AND_TP73_UP	9	0.775609	1.86996	0.00243902	0.098679	0.795	3855	tags=78%, list=18%, signal=94%
SHEPARD_CRUSH_AND_BURN_MUTANT_UP	153	0.404014	1.85076	0	0.116852	0.86	4495	tags=37%, list=21%, signal=47%
COLLER_MYC_TARGETS_UP	21	0.594986	1.84518	0.00526316	0.118496	0.875	5581	tags=62%, list=25%, signal=83%
BOSCO_EPITHELIAL_DIFFERENTIATION_MODULE	45	0.492095	1.84505	0	0.112731	0.875	2632	tags=33%, list=12%, signal=38%
VANLOO_SP3_TARGETS_UP	7	0.825624	1.83914	0	0.115691	0.895	818	tags=43%, list=4%, signal=45%
ONDER_CDH1_TARGETS_3_DN	40	0.50548	1.83256	0.00275482	0.118331	0.913	2632	tags=43%, list=12%, signal=48%
CHO_NR4A1_TARGETS	29	0.544534	1.82697	0.0025974	0.119794	0.923	2500	tags=41%, list=11%, signal=47%
YAO_TEMPORAL_RESPONSE_TO_PROGESTERONE_CLUSTER_14	112	0.409075	1.81491	0	0.131037	0.941	5917	tags=48%, list=27%, signal=66%
PARK_OSTEOBLAST_DIFFERENTIATION_BY_PHENYLAMIL_UP	9	0.74443	1.81224	0.005	0.128864	0.944	2595	tags=56%, list=12%, signal=63%
PENG_RAPAMYCIN_RESPONSE_DN	204	0.379818	1.81185	0	0.124371	0.946	5064	tags=37%, list=23%, signal=48%
GROSS_HYPOXIA_VIA_HIF1A_UP	63	0.450111	1.80042	0	0.134348	0.97	4495	tags=38%, list=21%, signal=48%
MIKKELSEN_PARTIALLY_REPROGRAMMED_TO_PLURIPOTENCY	9	0.737608	1.79284	0.0121951	0.139597	0.975	3404	tags=56%, list=16%, signal=66%
WANG_RESPONSE_TO_GSK3_INHIBITOR_SB216763_DN	276	0.360773	1.79054	0	0.138017	0.98	6722	tags=49%, list=31%, signal=70%
BERENJENO_TRANSFORMED_BY_RHOA_UP	439	0.33964	1.78636	0	0.139392	0.982	6424	tags=44%, list=29%, signal=61%
FUJIWARA_PARK2_IN_LIVER_CANCER_UP	8	0.774649	1.78377	0	0.138493	0.983	4045	tags=75%, list=18%, signal=92%
LIM_MAMMARY_LUMINAL_PROGENITOR_UP	49	0.458899	1.77417	0	0.148088	0.988	3990	tags=33%, list=18%, signal=40%
FOURNIER_ACINAR_DEVELOPMENT_LATE_2	228	0.358481	1.76274	0	0.161718	0.994	6295	tags=45%, list=29%, signal=62%
SCHLINGEMANN_SKIN_CARCINOGENESIS_TPA_UP	32	0.499911	1.75616	0.00519481	0.168177	0.997	2190	tags=25%, list=10%, signal=28%
WANG_METHYLATED_IN_BREAST_CANCER	31	0.517011	1.75026	0.00560224	0.171967	0.997	3544	tags=35%, list=16%, signal=42%
MIKKELSEN_IPS_LCP_WITH_H3K27ME3	6	0.818901	1.74001	0.00898876	0.18395	0.997	1552	tags=50%, list=7%, signal=54%
BLUM_RESPONSE_TO_SALIRASIB_UP	209	0.367995	1.73941	0	0.180349	0.997	4131	tags=25%, list=19%, signal=31%
PACHER_TARGETS_OF_IGF1_AND_IGF2_UP	27	0.525907	1.73868	0.0103627	0.176864	0.997	4504	tags=52%, list=21%, signal=65%
BURTON_ADIPOGENESIS_PEAK_AT_16HR	34	0.508139	1.73133	0.00791557	0.185602	0.998	6547	tags=56%, list=30%, signal=80%
IRITANI_MAD1_TARGETS_DN	36	0.484122	1.72642	0.00549451	0.18925	0.998	5745	tags=44%, list=26%, signal=60%
TUOMISTO_TUMOR_SUPPRESSION_BY_COL13A1_UP	12	0.660475	1.72574	0.0118483	0.186158	0.998	3063	tags=42%, list=14%, signal=48%
AMIT_SERUM_RESPONSE_240_MCF10A	52	0.445222	1.71551	0	0.199162	0.999	4966	tags=40%, list=23%, signal=52%
ABRAMSON_INTERACT_WITH_AIRE	38	0.477029	1.71344	0	0.199064	1	5137	tags=47%, list=23%, signal=62%
CHANG_CORE_SERUM_RESPONSE_UP	167	0.369522	1.71039	0	0.200517	1	5242	tags=38%, list=24%, signal=50%
AMIT_EGF_RESPONSE_480_MCF10A	35	0.498162	1.70899	0.0112676	0.198316	1	1561	tags=23%, list=7%, signal=25%
SHIPP_DLBCL_VS_FOLLICULAR_LYMPHOMA_UP	41	0.454384	1.70499	0.00275482	0.201385	1	3822	tags=34%, list=17%, signal=41%
RICKMAN_HEAD_AND_NECK_CANCER_C	69	0.417727	1.6991	0	0.207236	1	1391	tags=22%, list=6%, signal=23%
POMEROY_MEDULLOBLASTOMA_PROGNOSIS_DN	41	0.465623	1.68223	0.00867052	0.234128	1	4069	tags=29%, list=19%, signal=36%
CHARAFE_BREAST_CANCER_BASAL_VS_MESENCHYMAL_UP	87	0.394111	1.68181	0.00331126	0.230139	1	2410	tags=25%, list=11%, signal=28%
INGA_TP53_TARGETS	15	0.597412	1.67775	0.0179028	0.234043	1	3135	tags=47%, list=14%, signal=54%
TOOKER_GEMCITABINE_RESISTANCE_DN	108	0.377947	1.67631	0	0.232175	1	2892	tags=25%, list=13%, signal=29%
KARLSSON_TGFB1_TARGETS_UP	98	0.389512	1.6763	0	0.22771	1	5507	tags=45%, list=25%, signal=60%
OXFORD_RALA_OR_RALB_TARGETS_UP	41	0.462218	1.67581	0.00295858	0.224315	1	6954	tags=51%, list=32%, signal=75%
SABATES_COLORECTAL_ADENOMA_SIZE_UP	13	0.620292	1.67415	0.00997506	0.223603	1	1531	tags=23%, list=7%, signal=25%
CUI_GLUCOSE_DEPRIVATION	54	0.44054	1.66837	0.00280899	0.230084	1	2306	tags=20%, list=11%, signal=23%
TONKS_TARGETS_OF_RUNX1_RUNX1T1_FUSION_SUSTAINDED_IN_ERYTHROCYTE_UP	38	0.467434	1.66613	0.00514139	0.229843	1	2061	tags=26%, list=9%, signal=29%
HELLER_SILENCED_BY_METHYLATION_DN	85	0.395998	1.66271	0.00331126	0.232133	1	2720	tags=29%, list=12%, signal=33%
NAGASHIMA_EGF_SIGNALING_UP	51	0.432704	1.65492	0.00576369	0.244294	1	3717	tags=33%, list=17%, signal=40%
DANG_REGULATED_BY_MYC_UP	59	0.424453	1.64809	0.00294118	0.254432	1	4449	tags=42%, list=20%, signal=53%
CAIRO_HEPATOBLASTOMA_CLASSES_UP	488	0.311052	1.64618	0	0.254227	1	5077	tags=28%, list=23%, signal=36%
NAKAMURA_CANCER_MICROENVIRONMENT_DN	41	0.451939	1.64526	0.0153453	0.251622	1	1681	tags=22%, list=8%, signal=24%
PODAR_RESPONSE_TO_ADAPHOSTIN_UP	114	0.372267	1.64356	0	0.250885	1	2005	tags=17%, list=9%, signal=18%
GAUSSMANN_MLL_AF4_FUSION_TARGETS_C_DN	18	0.546573	1.63823	0.02331	0.257369	1	3570	tags=50%, list=16%, signal=60%
NADLER_HYPERGLYCEMIA_AT_OBESITY	53	0.419287	1.63814	0.0057971	0.253536	1	4175	tags=28%, list=19%, signal=35%
MARCINIAK_ER_STRESS_RESPONSE_VIA_CHOP	21	0.54015	1.63323	0.0195599	0.259441	1	3408	tags=33%, list=16%, signal=39%
SARTIPY_BLUNTED_BY_INSULIN_RESISTANCE_DN	16	0.568438	1.62918	0.00728155	0.263611	1	2423	tags=25%, list=11%, signal=28%
DE_YY1_TARGETS_UP	16	0.556344	1.62527	0.0394089	0.268301	1	1350	tags=31%, list=6%, signal=33%
VERNELL_RETINOBLASTOMA_PATHWAY_DN	15	0.576566	1.62404	0.0189573	0.266706	1	3433	tags=40%, list=16%, signal=47%
SARRIO_EPITHELIAL_MESENCHYMAL_TRANSITION_UP	140	0.355111	1.62232	0	0.266615	1	7224	tags=49%, list=33%, signal=72%
AMIT_EGF_RESPONSE_480_HELA	135	0.35355	1.61298	0.00675676	0.282962	1	3535	tags=26%, list=16%, signal=31%
MA_PITUITARY_FETAL_VS_ADULT_DN	15	0.571996	1.61196	0.0263789	0.281151	1	5920	tags=53%, list=27%, signal=73%
DANG_MYC_TARGETS_UP	116	0.364698	1.61161	0	0.277922	1	6599	tags=44%, list=30%, signal=63%
SCHLOSSER_MYC_TARGETS_REPRESSED_BY_SERUM	119	0.358377	1.61003	0.00377358	0.277099	1	6191	tags=41%, list=28%, signal=57%
VISALA_RESPONSE_TO_HEAT_SHOCK_AND_AGING_DN	10	0.64071	1.60904	0.0302326	0.27567	1	6712	tags=60%, list=31%, signal=86%
AMIT_EGF_RESPONSE_120_MCF10A	39	0.454173	1.6084	0.0144928	0.273381	1	3776	tags=38%, list=17%, signal=46%
LAU_APOPTOSIS_CDKN2A_UP	51	0.423659	1.60705	0	0.27261	1	6076	tags=41%, list=28%, signal=57%
HU_GENOTOXIC_DAMAGE_24HR	25	0.500775	1.60462	0.0183727	0.274221	1	2231	tags=28%, list=10%, signal=31%
MYLLYKANGAS_AMPLIFICATION_HOT_SPOT_25	9	0.652175	1.60397	0.040724	0.272232	1	1475	tags=44%, list=7%, signal=48%
MATZUK_SPERMATOGONIA	23	0.499111	1.60351	0.0169492	0.269452	1	3386	tags=39%, list=15%, signal=46%
MIKKELSEN_PLURIPOTENT_STATE_DN	8	0.693737	1.60251	0.0317073	0.268053	1	4960	tags=75%, list=23%, signal=97%
OXFORD_RALA_TARGETS_UP	7	0.721714	1.60185	0.0291262	0.266142	1	2968	tags=43%, list=14%, signal=50%
SCHLOSSER_MYC_TARGETS_AND_SERUM_RESPONSE_DN	40	0.453314	1.59744	0.0216049	0.272152	1	6461	tags=58%, list=30%, signal=81%
KRIEG_HYPOXIA_VIA_KDM3A	45	0.430461	1.59639	0.00286533	0.270815	1	4822	tags=47%, list=22%, signal=60%
DAZARD_UV_RESPONSE_CLUSTER_G5	7	0.705555	1.59577	0.0227273	0.26878	1	314	tags=14%, list=1%, signal=14%
NIKOLSKY_BREAST_CANCER_22Q13_AMPLICON	13	0.580623	1.58436	0.0341207	0.289658	1	3019	tags=38%, list=14%, signal=45%
DER_IFN_GAMMA_RESPONSE_DN	8	0.689782	1.58384	0.0322581	0.287346	1	3395	tags=38%, list=16%, signal=44%
CAIRO_HEPATOBLASTOMA_POOR_SURVIVAL	15	0.560771	1.57696	0.0307329	0.299397	1	4217	tags=47%, list=19%, signal=58%
MUELLER_PLURINET	248	0.319804	1.57441	0	0.301366	1	7269	tags=46%, list=33%, signal=69%
FU_INTERACT_WITH_ALKBH8	12	0.598455	1.57321	0.0483871	0.300253	1	4767	tags=58%, list=22%, signal=75%
SESTO_RESPONSE_TO_UV_C1	60	0.406764	1.57097	0.00628931	0.301345	1	6614	tags=48%, list=30%, signal=69%
WEBER_METHYLATED_LCP_IN_SPERM_UP	13	0.59806	1.56735	0.04	0.30597	1	800	tags=31%, list=4%, signal=32%
SMID_BREAST_CANCER_RELAPSE_IN_LUNG_UP	17	0.535279	1.56546	0.0464548	0.306364	1	1578	tags=35%, list=7%, signal=38%
MATZUK_MATERNAL_EFFECT	7	0.708561	1.56509	0.0449438	0.303744	1	4621	tags=71%, list=21%, signal=91%
TIMOFEEVA_GROWTH_STRESS_VIA_STAT1_DN	14	0.565243	1.5649	0.0428571	0.300812	1	4960	tags=43%, list=23%, signal=55%
YAO_TEMPORAL_RESPONSE_TO_PROGESTERONE_CLUSTER_8	39	0.442027	1.56439	0.0151899	0.298768	1	2892	tags=31%, list=13%, signal=35%
AMIT_EGF_RESPONSE_60_MCF10A	33	0.462155	1.56396	0.0134048	0.296637	1	5807	tags=45%, list=27%, signal=62%
PROVENZANI_METASTASIS_DN	113	0.353365	1.56151	0.00327869	0.299145	1	5706	tags=37%, list=26%, signal=50%
HANN_RESISTANCE_TO_BCL2_INHIBITOR_DN	42	0.42611	1.55606	0.00571429	0.308309	1	3125	tags=31%, list=14%, signal=36%
NIKOLSKY_BREAST_CANCER_7P22_AMPLICON	20	0.510051	1.55373	0.0347395	0.31031	1	1077	tags=15%, list=5%, signal=16%
KANG_FLUOROURACIL_RESISTANCE_DN	15	0.539669	1.55235	0.0362319	0.310278	1	2946	tags=40%, list=13%, signal=46%
GROSS_HIF1A_TARGETS_DN	19	0.510986	1.55068	0.0282776	0.310554	1	1842	tags=37%, list=8%, signal=40%
SHIN_B_CELL_LYMPHOMA_CLUSTER_6	11	0.595727	1.54995	0.0357995	0.309077	1	1755	tags=36%, list=8%, signal=40%
MARTORIATI_MDM4_TARGETS_FETAL_LIVER_UP	165	0.326555	1.54774	0	0.310444	1	2782	tags=21%, list=13%, signal=24%
BASAKI_YBX1_TARGETS_UP	218	0.32202	1.5467	0.004329	0.309666	1	5284	tags=33%, list=24%, signal=44%
RUIZ_TNC_TARGETS_DN	116	0.352445	1.54633	0.00371747	0.307388	1	6228	tags=46%, list=28%, signal=64%
NAGASHIMA_NRG1_SIGNALING_UP	153	0.332578	1.54399	0	0.309828	1	5426	tags=39%, list=25%, signal=51%
GLINSKY_CANCER_DEATH_UP	6	0.72683	1.54161	0.0400891	0.312182	1	47	tags=17%, list=0%, signal=17%
TONKS_TARGETS_OF_RUNX1_RUNX1T1_FUSION_SUSTAINED_IN_MONOCYTE_UP	20	0.511503	1.54019	0.0397022	0.31242	1	2061	tags=30%, list=9%, signal=33%
LIANG_SILENCED_BY_METHYLATION_DN	7	0.693997	1.53945	0.0323326	0.311188	1	4840	tags=57%, list=22%, signal=73%
ONDER_CDH1_TARGETS_1_DN	124	0.345237	1.53295	0.00361011	0.32193	1	6228	tags=49%, list=28%, signal=68%
CROMER_TUMORIGENESIS_DN	39	0.420834	1.53235	0.0188172	0.320268	1	2811	tags=36%, list=13%, signal=41%
BASSO_B_LYMPHOCYTE_NETWORK	115	0.340529	1.5319	0.00350877	0.318547	1	5191	tags=37%, list=24%, signal=49%
AMIT_SERUM_RESPONSE_20_MCF10A	15	0.546355	1.52833	0.0502392	0.323098	1	3832	tags=40%, list=18%, signal=48%
CHEN_HOXA5_TARGETS_9HR_UP	154	0.330489	1.52829	0	0.32034	1	5707	tags=31%, list=26%, signal=42%
CHEOK_RESPONSE_TO_HD_MTX_UP	15	0.542238	1.52673	0.0451306	0.321058	1	2803	tags=47%, list=13%, signal=53%
MULLIGAN_NTF3_SIGNALING_VIA_INSR_AND_IGF1R_UP	19	0.511173	1.52581	0.0583756	0.320485	1	2865	tags=42%, list=13%, signal=48%
MEISSNER_ES_ICP_WITH_H3K4ME3_AND_H3K27ME3	12	0.574714	1.51788	0.0532407	0.335356	1	1283	tags=33%, list=6%, signal=35%
MATZUK_IMPLANTATION_AND_UTERINE	17	0.522132	1.517	0.0477327	0.334383	1	1758	tags=24%, list=8%, signal=26%
SUH_COEXPRESSED_WITH_ID1_AND_ID2_UP	16	0.526171	1.51256	0.0555556	0.341367	1	3250	tags=38%, list=15%, signal=44%
MATTIOLI_MGUS_VS_PCL	80	0.361304	1.51187	0.0161812	0.339939	1	4703	tags=31%, list=21%, signal=40%
RODRIGUES_THYROID_CARCINOMA_POORLY_DIFFERENTIATED_UP	479	0.287642	1.51142	0	0.338334	1	5989	tags=36%, list=27%, signal=48%
XU_RESPONSE_TO_TRETINOIN_AND_NSC682994_DN	12	0.574214	1.51061	0.0566038	0.337334	1	5930	tags=58%, list=27%, signal=80%
RASHI_NFKB1_TARGETS	18	0.511051	1.50762	0.052381	0.341428	1	6153	tags=61%, list=28%, signal=85%
NOJIMA_SFRP2_TARGETS_UP	25	0.470311	1.49939	0.044335	0.357483	1	2454	tags=24%, list=11%, signal=27%
STANHILL_HRAS_TRANSFROMATION_UP	8	0.646266	1.49791	0.0806846	0.358046	1	5990	tags=63%, list=27%, signal=86%
XU_HGF_TARGETS_INDUCED_BY_AKT1_48HR_UP	12	0.566843	1.49344	0.0817308	0.365687	1	3855	tags=58%, list=18%, signal=71%
LEONARD_HYPOXIA	37	0.414432	1.49118	0.0277778	0.36799	1	3433	tags=35%, list=16%, signal=42%
ISHIDA_TARGETS_OF_SYT_SSX_FUSIONS	6	0.703373	1.49026	0.0640732	0.367184	1	1876	tags=50%, list=9%, signal=55%
ONDER_CDH1_TARGETS_2_DN	358	0.291955	1.48829	0	0.368736	1	3968	tags=30%, list=18%, signal=36%
BURTON_ADIPOGENESIS_PEAK_AT_2HR	47	0.401553	1.48684	0.0189702	0.369031	1	3433	tags=28%, list=16%, signal=33%
ZHANG_TLX_TARGETS_UP	71	0.36537	1.48634	0.0214724	0.367237	1	6420	tags=44%, list=29%, signal=62%
CLASPER_LYMPHATIC_VESSELS_DURING_METASTASIS_UP	18	0.503665	1.48315	0.0410628	0.372159	1	5112	tags=56%, list=23%, signal=72%
SMIRNOV_RESPONSE_TO_IR_2HR_UP	41	0.404352	1.48036	0.0380435	0.375686	1	3496	tags=29%, list=16%, signal=35%
GHANDHI_DIRECT_IRRADIATION_UP	78	0.359625	1.47682	0.0162866	0.381275	1	3213	tags=31%, list=15%, signal=36%
SMID_BREAST_CANCER_NORMAL_LIKE_DN	5	0.742218	1.47593	0.0674157	0.380632	1	3342	tags=80%, list=15%, signal=94%
GENTILE_UV_RESPONSE_CLUSTER_D9	18	0.500402	1.47361	0.0523691	0.383406	1	4546	tags=44%, list=21%, signal=56%
ZHOU_CELL_CYCLE_GENES_IN_IR_RESPONSE_6HR	67	0.363655	1.47276	0.0203488	0.382865	1	7101	tags=45%, list=32%, signal=66%
SEMENZA_HIF1_TARGETS	29	0.430708	1.47246	0.0378788	0.380742	1	3433	tags=45%, list=16%, signal=53%
SCHLOSSER_MYC_TARGETS_AND_SERUM_RESPONSE_UP	41	0.4039	1.47213	0.0295699	0.378757	1	5306	tags=44%, list=24%, signal=58%
WARTERS_IR_RESPONSE_5GY	33	0.424452	1.46941	0.048913	0.38235	1	3135	tags=36%, list=14%, signal=42%
HUMMERICH_BENIGN_SKIN_TUMOR_UP	13	0.556456	1.46778	0.0605327	0.383513	1	352	tags=23%, list=2%, signal=23%
PUIFFE_INVASION_INHIBITED_BY_ASCITES_UP	64	0.361403	1.46757	0.0302115	0.381329	1	4867	tags=39%, list=22%, signal=50%
JOHNSTONE_PARVB_TARGETS_1_UP	6	0.677996	1.46552	0.0960187	0.383364	1	5071	tags=67%, list=23%, signal=87%
WANG_TARGETS_OF_MLL_CBP_FUSION_DN	39	0.40759	1.46323	0.0343008	0.386116	1	6490	tags=59%, list=30%, signal=84%
HEDENFALK_BREAST_CANCER_HEREDITARY_VS_SPORADIC	41	0.397631	1.46319	0.0335196	0.38352	1	5899	tags=44%, list=27%, signal=60%
BOYAULT_LIVER_CANCER_SUBCLASS_G3_UP	143	0.318599	1.46302	0.00384615	0.381316	1	6965	tags=45%, list=32%, signal=66%
TARTE_PLASMA_CELL_VS_PLASMABLAST_DN	260	0.296457	1.46057	0.00471698	0.384471	1	6327	tags=37%, list=29%, signal=52%
LEE_METASTASIS_AND_RNA_PROCESSING_UP	15	0.518427	1.46043	0.0611765	0.382149	1	6562	tags=67%, list=30%, signal=95%
BILD_MYC_ONCOGENIC_SIGNATURE	145	0.321117	1.46022	0.011583	0.380011	1	4123	tags=34%, list=19%, signal=42%
JI_CARCINOGENESIS_BY_KRAS_AND_STK11_UP	8	0.621071	1.45808	0.0915842	0.382621	1	5927	tags=88%, list=27%, signal=120%
WONG_EMBRYONIC_STEM_CELL_CORE	291	0.292913	1.45803	0	0.380166	1	6729	tags=36%, list=31%, signal=51%
CAFFAREL_RESPONSE_TO_THC_24HR_3_UP	6	0.692886	1.45651	0.0886364	0.381406	1	493	tags=17%, list=2%, signal=17%
LIN_SILENCED_BY_TUMOR_MICROENVIRONMENT	75	0.356572	1.45399	0.0160256	0.384794	1	3913	tags=31%, list=18%, signal=37%
CASTELLANO_NRAS_TARGETS_DN	14	0.520851	1.45298	0.0752427	0.38453	1	2985	tags=50%, list=14%, signal=58%
CHASSOT_SKIN_WOUND	10	0.584968	1.4525	0.0898058	0.383331	1	3717	tags=40%, list=17%, signal=48%
TSENG_ADIPOGENIC_POTENTIAL_UP	29	0.431904	1.44726	0.0659898	0.392965	1	1215	tags=14%, list=6%, signal=15%
PURBEY_TARGETS_OF_CTBP1_AND_SATB1_UP	60	0.372384	1.44666	0.0236686	0.391981	1	3226	tags=25%, list=15%, signal=29%
PEDERSEN_METASTASIS_BY_ERBB2_ISOFORM_1	38	0.402756	1.44658	0.0424403	0.38978	1	3717	tags=37%, list=17%, signal=44%
DACOSTA_LOW_DOSE_UV_RESPONSE_VIA_ERCC3_XPCS_DN	7	0.627914	1.44318	0.0655738	0.395195	1	3433	tags=43%, list=16%, signal=51%
FUNG_IL2_SIGNALING_1	8	0.600328	1.44238	0.097852	0.394675	1	764	tags=25%, list=3%, signal=26%
BARRIER_CANCER_RELAPSE_TUMOR_SAMPLE_DN	6	0.660833	1.44018	0.0781991	0.397593	1	4637	tags=50%, list=21%, signal=63%
BYSTRYKH_SCP2_QTL	5	0.711992	1.43488	0.109914	0.408002	1	1065	tags=20%, list=5%, signal=21%
NGUYEN_NOTCH1_TARGETS_DN	77	0.342861	1.43123	0.01875	0.414428	1	3479	tags=27%, list=16%, signal=32%
SUZUKI_CTCFL_TARGETS_UP	10	0.582264	1.43117	0.0935961	0.412032	1	4423	tags=50%, list=20%, signal=63%
SCHAVOLT_TARGETS_OF_TP53_AND_TP63	13	0.539291	1.43066	0.0837321	0.410792	1	3135	tags=46%, list=14%, signal=54%
LEE_CALORIE_RESTRICTION_NEOCORTEX_DN	83	0.345647	1.42912	0.0150602	0.411957	1	3046	tags=23%, list=14%, signal=26%
DAVICIONI_RHABDOMYOSARCOMA_PAX_FOXO1_FUSION_DN	13	0.538422	1.42747	0.0772947	0.413519	1	1046	tags=23%, list=5%, signal=24%
KERLEY_RESPONSE_TO_CISPLATIN_UP	37	0.399757	1.42737	0.0502959	0.411212	1	4956	tags=49%, list=23%, signal=63%
DUTERTRE_ESTRADIOL_RESPONSE_24HR_UP	253	0.293765	1.42678	0	0.410287	1	6262	tags=39%, list=29%, signal=54%
GINESTIER_BREAST_CANCER_ZNF217_AMPLIFIED_DN	222	0.291156	1.42628	0.0046729	0.409073	1	5205	tags=35%, list=24%, signal=45%
SMITH_TERT_TARGETS_UP	129	0.319053	1.42396	0.00706714	0.412415	1	4568	tags=30%, list=21%, signal=38%
HUANG_GATA2_TARGETS_DN	64	0.359142	1.42373	0.0229226	0.410563	1	2909	tags=23%, list=13%, signal=27%
PIONTEK_PKD1_TARGETS_DN	11	0.535123	1.42031	0.0792839	0.416318	1	5472	tags=45%, list=25%, signal=61%
MARZEC_IL2_SIGNALING_UP	97	0.327094	1.41767	0.0201342	0.420214	1	5072	tags=36%, list=23%, signal=47%
TESAR_ALK_TARGETS_EPISC_3D_UP	7	0.631106	1.41708	0.0981735	0.419412	1	1704	tags=57%, list=8%, signal=62%
RAHMAN_TP53_TARGETS_PHOSPHORYLATED	17	0.492053	1.41464	0.0876289	0.423098	1	7450	tags=59%, list=34%, signal=89%
KRIGE_RESPONSE_TO_TOSEDOSTAT_24HR_DN	709	0.261833	1.41081	0	0.430246	1	5402	tags=33%, list=25%, signal=43%
PETRETTO_BLOOD_PRESSURE_UP	12	0.537006	1.41072	0.0769231	0.428055	1	3789	tags=50%, list=17%, signal=60%
NIELSEN_SCHWANNOMA_UP	14	0.517847	1.40612	0.101617	0.436955	1	3971	tags=43%, list=18%, signal=52%
SMID_BREAST_CANCER_BASAL_UP	503	0.270111	1.40329	0	0.441696	1	3781	tags=25%, list=17%, signal=30%
KYNG_DNA_DAMAGE_BY_4NQO_OR_GAMMA_RADIATION	13	0.508789	1.40307	0.0911271	0.439841	1	1993	tags=31%, list=9%, signal=34%
OUYANG_PROSTATE_CANCER_PROGRESSION_DN	19	0.458365	1.39899	0.0721393	0.447529	1	2972	tags=21%, list=14%, signal=24%
LI_CYTIDINE_ANALOGS_CYCTOTOXICITY	13	0.524358	1.39815	0.0794872	0.446972	1	817	tags=23%, list=4%, signal=24%
RICKMAN_TUMOR_DIFFERENTIATED_WELL_VS_MODERATELY_DN	82	0.338235	1.39425	0.0227273	0.454601	1	3457	tags=27%, list=16%, signal=32%
HOFMANN_MYELODYSPLASTIC_SYNDROM_LOW_RISK_DN	25	0.433764	1.39368	0.0865385	0.45378	1	5224	tags=48%, list=24%, signal=63%
SCHMIDT_POR_TARGETS_IN_LIMB_BUD_UP	24	0.43459	1.39109	0.0859375	0.458218	1	2189	tags=29%, list=10%, signal=32%
MAHADEVAN_RESPONSE_TO_MP470_DN	16	0.487831	1.38975	0.105943	0.459431	1	3702	tags=44%, list=17%, signal=53%
ZUCCHI_METASTASIS_DN	35	0.400651	1.38699	0.0706806	0.464346	1	6754	tags=46%, list=31%, signal=66%
SMID_BREAST_CANCER_RELAPSE_IN_BONE_DN	239	0.286773	1.3866	0.00507614	0.463	1	3528	tags=26%, list=16%, signal=30%
PLASARI_TGFB1_TARGETS_1HR_UP	31	0.404947	1.38607	0.0642458	0.461818	1	4634	tags=52%, list=21%, signal=65%
WEBER_METHYLATED_LCP_IN_FIBROBLAST_DN	8	0.59939	1.38598	0.123487	0.459594	1	1829	tags=38%, list=8%, signal=41%
WANG_BARRETTS_ESOPHAGUS_DN	23	0.440922	1.38578	0.078125	0.457635	1	1758	tags=26%, list=8%, signal=28%
JIANG_TIP30_TARGETS_DN	24	0.441845	1.38565	0.0720222	0.455579	1	3131	tags=33%, list=14%, signal=39%
WEI_MYCN_TARGETS_WITH_E_BOX	587	0.257772	1.38377	0	0.457904	1	6461	tags=39%, list=30%, signal=54%
PENG_LEUCINE_DEPRIVATION_DN	157	0.300694	1.38358	0.00381679	0.456037	1	6972	tags=49%, list=32%, signal=71%
HESS_TARGETS_OF_HOXA9_AND_MEIS1_UP	56	0.35753	1.38314	0.0532544	0.454715	1	5961	tags=48%, list=27%, signal=66%
WARTERS_RESPONSE_TO_IR_SKIN	53	0.352053	1.38097	0.0441177	0.458077	1	2974	tags=26%, list=14%, signal=30%
KAUFFMANN_MELANOMA_RELAPSE_UP	54	0.361496	1.38078	0.0429799	0.456233	1	7864	tags=56%, list=36%, signal=86%
SIMBULAN_UV_RESPONSE_NORMAL_DN	25	0.426155	1.38051	0.0963542	0.454586	1	4836	tags=36%, list=22%, signal=46%
VECCHI_GASTRIC_CANCER_EARLY_UP	315	0.276309	1.37962	0	0.454678	1	5961	tags=37%, list=27%, signal=50%
XU_HGF_SIGNALING_NOT_VIA_AKT1_6HR	24	0.426191	1.37953	0.0716049	0.452658	1	3544	tags=29%, list=16%, signal=35%
STREICHER_LSM1_TARGETS_DN	16	0.478467	1.37803	0.0946602	0.45417	1	1728	tags=31%, list=8%, signal=34%
ZHAN_MULTIPLE_MYELOMA_CD1_VS_CD2_UP	55	0.366218	1.37656	0.0435967	0.455523	1	2239	tags=22%, list=10%, signal=24%
WANG_RESPONSE_TO_PACLITAXEL_VIA_MAPK8_UP	10	0.541525	1.375	0.11954	0.457394	1	3358	tags=50%, list=15%, signal=59%
KOMMAGANI_TP63_GAMMA_TARGETS	8	0.587101	1.37344	0.131336	0.459154	1	2267	tags=25%, list=10%, signal=28%
DELPUECH_FOXO3_TARGETS_DN	36	0.388014	1.37243	0.0769231	0.459577	1	3746	tags=28%, list=17%, signal=33%
SESTO_RESPONSE_TO_UV_C7	57	0.356	1.37079	0.0482574	0.461435	1	2814	tags=26%, list=13%, signal=30%
LIANG_HEMATOPOIESIS_STEM_CELL_NUMBER_LARGE_VS_TINY_DN	36	0.384974	1.3705	0.0824176	0.459991	1	2668	tags=25%, list=12%, signal=28%
BERGER_MBD2_TARGETS	5	0.674633	1.36944	0.152273	0.460646	1	2904	tags=60%, list=13%, signal=69%
CASORELLI_APL_SECONDARY_VS_DE_NOVO_DN	8	0.582638	1.36926	0.129717	0.458974	1	8947	tags=88%, list=41%, signal=148%
CHEN_LVAD_SUPPORT_OF_FAILING_HEART_UP	85	0.321216	1.36457	0.0483871	0.469087	1	3477	tags=24%, list=16%, signal=28%
AMIT_EGF_RESPONSE_20_HELA	10	0.551303	1.36287	0.14455	0.471272	1	4822	tags=40%, list=22%, signal=51%
TCGA_GLIOBLASTOMA_COPY_NUMBER_UP	52	0.369672	1.36255	0.0638298	0.469943	1	5217	tags=35%, list=24%, signal=45%
FERRARI_RESPONSE_TO_FENRETINIDE_UP	17	0.466444	1.36196	0.0965347	0.469301	1	2570	tags=41%, list=12%, signal=47%
ZHAN_MULTIPLE_MYELOMA_SUBGROUPS	28	0.404457	1.35951	0.0837696	0.473935	1	7581	tags=54%, list=35%, signal=82%
PHESSE_TARGETS_OF_APC_AND_MBD2_DN	10	0.557002	1.35937	0.114537	0.47204	1	1719	tags=30%, list=8%, signal=33%
STEIN_ESRRA_TARGETS_RESPONSIVE_TO_ESTROGEN_UP	22	0.433214	1.3588	0.0932643	0.471348	1	6664	tags=64%, list=30%, signal=91%
LANDEMAINE_LUNG_METASTASIS	15	0.470836	1.35746	0.117241	0.472463	1	1071	tags=20%, list=5%, signal=21%
MAINA_HYPOXIA_VHL_TARGETS_UP	5	0.65684	1.35612	0.16777	0.473734	1	5107	tags=80%, list=23%, signal=104%
RODRIGUES_THYROID_CARCINOMA_ANAPLASTIC_UP	537	0.254848	1.35511	0	0.474234	1	5317	tags=28%, list=24%, signal=37%
FUJIWARA_PARK2_HEPATOCYTE_PROLIFERATION_UP	10	0.532927	1.35455	0.129754	0.473568	1	2597	tags=60%, list=12%, signal=68%
KANNAN_TP53_TARGETS_UP	48	0.353864	1.35311	0.0690608	0.475055	1	3364	tags=33%, list=15%, signal=39%
RODRIGUES_THYROID_CARCINOMA_UP	11	0.539564	1.3529	0.15311	0.473522	1	5573	tags=55%, list=25%, signal=73%
CHEOK_RESPONSE_TO_MERCAPTOPURINE_AND_LD_MTX_UP	8	0.568483	1.35145	0.1373	0.475005	1	6347	tags=50%, list=29%, signal=70%
SHEDDEN_LUNG_CANCER_POOR_SURVIVAL_A6	359	0.262474	1.34951	0.00568182	0.478111	1	5440	tags=31%, list=25%, signal=40%
DUTERTRE_ESTRADIOL_RESPONSE_6HR_UP	187	0.286778	1.34926	0.00469484	0.476594	1	6277	tags=42%, list=29%, signal=59%
GENTILE_UV_LOW_DOSE_UP	24	0.415925	1.34838	0.104218	0.476646	1	3678	tags=33%, list=17%, signal=40%
WIERENGA_PML_INTERACTOME	32	0.401214	1.348	0.12	0.475547	1	5930	tags=44%, list=27%, signal=60%
DAZARD_UV_RESPONSE_CLUSTER_G2	22	0.42425	1.34482	0.0913838	0.481913	1	5224	tags=50%, list=24%, signal=66%
CAFFAREL_RESPONSE_TO_THC_24HR_5_DN	43	0.370659	1.3437	0.0826211	0.482662	1	2315	tags=21%, list=11%, signal=23%
LANDIS_BREAST_CANCER_PROGRESSION_UP	39	0.371305	1.34134	0.077135	0.486759	1	6920	tags=49%, list=32%, signal=71%
MARIADASON_RESPONSE_TO_CURCUMIN_SULINDAC_5	22	0.430893	1.34042	0.102088	0.487048	1	3734	tags=45%, list=17%, signal=55%
COLLIS_PRKDC_REGULATORS	15	0.468187	1.33908	0.125628	0.488224	1	7067	tags=60%, list=32%, signal=89%
YAO_TEMPORAL_RESPONSE_TO_PROGESTERONE_CLUSTER_11	82	0.324233	1.33488	0.0492754	0.497565	1	2865	tags=29%, list=13%, signal=34%
NIKOLSKY_BREAST_CANCER_8Q23_Q24_AMPLICON	110	0.302754	1.33469	0.0366667	0.495993	1	4040	tags=29%, list=18%, signal=35%
AMIT_SERUM_RESPONSE_120_MCF10A	54	0.343046	1.33246	0.0887574	0.49955	1	4057	tags=30%, list=19%, signal=36%
PODAR_RESPONSE_TO_ADAPHOSTIN_DN	15	0.472735	1.33207	0.130435	0.49838	1	4081	tags=40%, list=19%, signal=49%
LUI_THYROID_CANCER_CLUSTER_4	8	0.575102	1.33129	0.146396	0.498388	1	3510	tags=38%, list=16%, signal=45%
STEIN_ESRRA_TARGETS_DN	74	0.322592	1.33073	0.0570571	0.497822	1	4512	tags=28%, list=21%, signal=36%
SHETH_LIVER_CANCER_VS_TXNIP_LOSS_PAM5	75	0.315023	1.33057	0.0385757	0.496077	1	3656	tags=35%, list=17%, signal=41%
TOYOTA_TARGETS_OF_MIR34B_AND_MIR34C	296	0.266137	1.32955	0.00568182	0.496888	1	6547	tags=41%, list=30%, signal=57%
PUJANA_CHEK2_PCC_NETWORK	618	0.248791	1.32934	0	0.495349	1	7151	tags=40%, list=33%, signal=57%
CHESLER_BRAIN_QTL_TRANS	6	0.616668	1.32722	0.183486	0.498859	1	348	tags=17%, list=2%, signal=17%
RASHI_RESPONSE_TO_IONIZING_RADIATION_2	109	0.29857	1.32581	0.0374532	0.500454	1	5767	tags=35%, list=26%, signal=47%
STAMBOLSKY_TARGETS_OF_MUTATED_TP53_UP	39	0.372287	1.3244	0.0817439	0.502161	1	1582	tags=18%, list=7%, signal=19%
HEDENFALK_BREAST_CANCER_BRCA1_VS_BRCA2	135	0.294951	1.32424	0.0354331	0.500504	1	3702	tags=24%, list=17%, signal=28%
RAMJAUN_APOPTOSIS_BY_TGFB1_VIA_SMAD4_UP	7	0.587992	1.32091	0.195704	0.507465	1	29	tags=14%, list=0%, signal=14%
SATO_SILENCED_BY_DEACETYLATION_IN_PANCREATIC_CANCER	34	0.369625	1.31679	0.0779944	0.516489	1	2500	tags=21%, list=11%, signal=23%
ZHAN_VARIABLE_EARLY_DIFFERENTIATION_GENES_DN	27	0.401893	1.31463	0.111688	0.520681	1	6600	tags=48%, list=30%, signal=69%
CEBALLOS_TARGETS_OF_TP53_AND_MYC_UP	18	0.437573	1.31433	0.135338	0.519376	1	5045	tags=44%, list=23%, signal=58%
NADERI_BREAST_CANCER_PROGNOSIS_UP	35	0.376972	1.31405	0.097561	0.518119	1	7258	tags=49%, list=33%, signal=73%
SCHAEFFER_PROSTATE_DEVELOPMENT_AND_CANCER_BOX1_DN	8	0.56993	1.31224	0.161572	0.521059	1	6215	tags=50%, list=28%, signal=70%
YAO_HOXA10_TARGETS_VIA_PROGESTERONE_DN	15	0.464475	1.31104	0.13382	0.522227	1	2061	tags=33%, list=9%, signal=37%
GROSS_HYPOXIA_VIA_ELK3_DN	134	0.287829	1.30422	0.011236	0.538368	1	3746	tags=25%, list=17%, signal=30%
TRAYNOR_RETT_SYNDROM_DN	14	0.469935	1.30135	0.164733	0.544345	1	7043	tags=57%, list=32%, signal=84%
KOBAYASHI_EGFR_SIGNALING_24HR_DN	203	0.267663	1.30096	0.0210084	0.543153	1	6339	tags=41%, list=29%, signal=57%
AIYAR_COBRA1_TARGETS_DN	23	0.411552	1.29992	0.146597	0.543973	1	5107	tags=35%, list=23%, signal=45%
RIZKI_TUMOR_INVASIVENESS_2D_UP	59	0.328054	1.29947	0.0991254	0.543035	1	4414	tags=36%, list=20%, signal=44%
BHAT_ESR1_TARGETS_NOT_VIA_AKT1_UP	163	0.278481	1.29916	0.00823045	0.541794	1	3595	tags=26%, list=16%, signal=31%
GERY_CEBP_TARGETS	107	0.296829	1.29908	0.0353357	0.539989	1	3702	tags=30%, list=17%, signal=36%
RICKMAN_HEAD_AND_NECK_CANCER_E	55	0.338291	1.29833	0.0787172	0.539928	1	2811	tags=27%, list=13%, signal=31%
VISALA_RESPONSE_TO_HEAT_SHOCK_AND_AGING_UP	11	0.499945	1.29765	0.147392	0.539792	1	5809	tags=55%, list=27%, signal=74%
ROESSLER_LIVER_CANCER_METASTASIS_DN	37	0.367051	1.29716	0.0992167	0.538942	1	2207	tags=19%, list=10%, signal=21%
WEBER_METHYLATED_ICP_IN_SPERM_UP	5	0.646875	1.29598	0.186047	0.539996	1	6829	tags=80%, list=31%, signal=116%
LIU_COMMON_CANCER_GENES	47	0.344412	1.29373	0.0817439	0.544072	1	5700	tags=36%, list=26%, signal=49%
LUDWICZEK_TREATING_IRON_OVERLOAD	5	0.652495	1.29359	0.202062	0.54244	1	1847	tags=60%, list=8%, signal=66%
NAGY_TFTC_COMPONENTS_HUMAN	16	0.438683	1.29356	0.143204	0.540469	1	3924	tags=31%, list=18%, signal=38%
BURTON_ADIPOGENESIS_2	65	0.321196	1.29235	0.0872274	0.541995	1	3496	tags=29%, list=16%, signal=35%
VERHAAK_GLIOBLASTOMA_MESENCHYMAL	174	0.271638	1.29212	0.0347826	0.540632	1	3765	tags=23%, list=17%, signal=28%
SANSOM_APC_TARGETS_REQUIRE_MYC	154	0.281488	1.29158	0.0311419	0.540088	1	6212	tags=44%, list=28%, signal=61%
MELLMAN_TUT1_TARGETS_UP	12	0.494287	1.29096	0.158621	0.539777	1	4016	tags=33%, list=18%, signal=41%
CAFFAREL_RESPONSE_TO_THC_UP	24	0.401315	1.2896	0.130208	0.541222	1	3357	tags=29%, list=15%, signal=34%
KYNG_RESPONSE_TO_H2O2_VIA_ERCC6_DN	39	0.362384	1.28899	0.116711	0.540885	1	4876	tags=31%, list=22%, signal=40%
MIKKELSEN_NPC_HCP_WITH_H3K4ME3_AND_H3K27ME3	176	0.275122	1.28624	0.0411985	0.546801	1	2374	tags=19%, list=11%, signal=21%
FARDIN_HYPOXIA_11	24	0.404728	1.28452	0.153646	0.549721	1	2211	tags=25%, list=10%, signal=28%
WU_HBX_TARGETS_2_UP	20	0.420845	1.28442	0.154667	0.547968	1	5820	tags=45%, list=27%, signal=61%
MIKKELSEN_ES_ICP_WITH_H3K27ME3	34	0.373458	1.28392	0.163683	0.547321	1	4163	tags=38%, list=19%, signal=47%
MARTORIATI_MDM4_TARGETS_NEUROEPITHELIUM_UP	135	0.282771	1.28229	0.0291971	0.549796	1	3054	tags=22%, list=14%, signal=26%
WINNEPENNINCKX_MELANOMA_METASTASIS_UP	119	0.289153	1.2822	0.0592105	0.548089	1	5929	tags=36%, list=27%, signal=49%
SASAI_TARGETS_OF_CXCR6_AND_PTCH1_UP	10	0.506401	1.28171	0.188636	0.547412	1	4453	tags=50%, list=20%, signal=63%
GENTILE_RESPONSE_CLUSTER_D3	53	0.335925	1.27787	0.0868347	0.555992	1	5363	tags=32%, list=24%, signal=42%
INAMURA_LUNG_CANCER_SCC_UP	11	0.495827	1.27709	0.172897	0.556383	1	4792	tags=45%, list=22%, signal=58%
HANSON_HRAS_SIGNALING_VIA_NFKB	19	0.423448	1.27468	0.159091	0.561476	1	4166	tags=47%, list=19%, signal=58%
MEISSNER_NPC_HCP_WITH_H3K4ME3_AND_H3K27ME3	113	0.289913	1.27329	0.0578231	0.563382	1	2374	tags=20%, list=11%, signal=23%
PHONG_TNF_TARGETS_UP	58	0.328406	1.27317	0.092219	0.561717	1	6675	tags=48%, list=30%, signal=69%
HASLINGER_B_CLL_WITH_6Q21_DELETION	10	0.518874	1.27299	0.193396	0.560188	1	5267	tags=50%, list=24%, signal=66%
WU_HBX_TARGETS_1_DN	21	0.410587	1.27255	0.149871	0.559478	1	5301	tags=43%, list=24%, signal=56%
BHAT_ESR1_TARGETS_VIA_AKT1_UP	205	0.269094	1.27228	0.0396476	0.558369	1	4470	tags=31%, list=20%, signal=39%
SILIGAN_TARGETS_OF_EWS_FLI1_FUSION_DN	15	0.447685	1.27095	0.166667	0.560137	1	2065	tags=27%, list=9%, signal=29%
GILMORE_CORE_NFKB_PATHWAY	14	0.458262	1.26955	0.161836	0.562183	1	6153	tags=57%, list=28%, signal=79%
ZHAN_MULTIPLE_MYELOMA_CD1_UP	37	0.35907	1.26754	0.117333	0.565938	1	1681	tags=19%, list=8%, signal=20%
GAJATE_RESPONSE_TO_TRABECTEDIN_DN	17	0.433434	1.267	0.169576	0.565463	1	6257	tags=59%, list=29%, signal=82%
FORTSCHEGGER_PHF8_TARGETS_UP	195	0.262212	1.26514	0.0352423	0.568813	1	3324	tags=19%, list=15%, signal=23%
GROSS_HYPOXIA_VIA_HIF1A_DN	91	0.300165	1.2648	0.0584615	0.567874	1	3746	tags=24%, list=17%, signal=29%
AMIT_EGF_RESPONSE_240_HELA	53	0.333116	1.26141	0.115607	0.575639	1	3871	tags=26%, list=18%, signal=32%
QI_HYPOXIA_TARGETS_OF_HIF1A_AND_FOXA2	31	0.363126	1.26025	0.127119	0.57695	1	4065	tags=32%, list=19%, signal=40%
INAMURA_LUNG_CANCER_SCC_SUBTYPES_UP	10	0.501313	1.25891	0.208	0.578929	1	2981	tags=30%, list=14%, signal=35%
NIKOLSKY_BREAST_CANCER_12Q24_AMPLICON	13	0.473125	1.25827	0.209424	0.578772	1	3917	tags=38%, list=18%, signal=47%
MENSSEN_MYC_TARGETS	44	0.338792	1.25661	0.105422	0.581556	1	4448	tags=39%, list=20%, signal=48%
STONER_ESOPHAGEAL_CARCINOGENESIS_UP	27	0.383402	1.25483	0.14433	0.5845	1	3703	tags=19%, list=17%, signal=22%
CAFFAREL_RESPONSE_TO_THC_DN	20	0.417929	1.25443	0.160622	0.5837	1	6680	tags=50%, list=31%, signal=72%
SMID_BREAST_CANCER_LUMINAL_A_DN	13	0.461874	1.25193	0.185644	0.588932	1	3694	tags=46%, list=17%, signal=55%
TARTE_PLASMA_CELL_VS_B_LYMPHOCYTE_DN	31	0.375122	1.25051	0.134367	0.591124	1	4678	tags=39%, list=21%, signal=49%
CAIRO_PML_TARGETS_BOUND_BY_MYC_UP	21	0.404925	1.25045	0.179487	0.5893	1	6006	tags=38%, list=27%, signal=52%
ENGELMANN_CANCER_PROGENITORS_UP	43	0.333391	1.24673	0.138028	0.598295	1	3677	tags=35%, list=17%, signal=42%
AIYAR_COBRA1_TARGETS_UP	33	0.35972	1.24619	0.135501	0.597997	1	1293	tags=15%, list=6%, signal=16%
CAFFAREL_RESPONSE_TO_THC_24HR_5_UP	28	0.37703	1.24598	0.164491	0.596634	1	1376	tags=11%, list=6%, signal=11%
LINSLEY_MIR16_TARGETS	166	0.265792	1.24572	0.0551181	0.595542	1	5852	tags=33%, list=27%, signal=44%
LEIN_CEREBELLUM_MARKERS	67	0.310735	1.24528	0.123494	0.594859	1	2510	tags=21%, list=11%, signal=24%
CAFFAREL_RESPONSE_TO_THC_8HR_3_DN	9	0.514367	1.2447	0.193853	0.594573	1	5356	tags=67%, list=24%, signal=88%
KIM_HYPOXIA	22	0.395293	1.24453	0.16624	0.593161	1	3433	tags=32%, list=16%, signal=38%
MEISSNER_NPC_HCP_WITH_H3_UNMETHYLATED	389	0.238839	1.24375	0.00591716	0.593629	1	1945	tags=17%, list=9%, signal=19%
BROWN_MYELOID_CELL_DEVELOPMENT_DN	102	0.283965	1.2388	0.101911	0.606109	1	3734	tags=26%, list=17%, signal=32%
BERENJENO_TRANSFORMED_BY_RHOA_FOREVER_DN	28	0.371975	1.23836	0.161804	0.605447	1	2760	tags=29%, list=13%, signal=33%
WAGNER_APO2_SENSITIVITY	21	0.402696	1.23813	0.177057	0.604194	1	989	tags=19%, list=5%, signal=20%
MIKKELSEN_MEF_HCP_WITH_H3_UNMETHYLATED	165	0.264076	1.23668	0.064257	0.606555	1	2001	tags=18%, list=9%, signal=20%
TORCHIA_TARGETS_OF_EWSR1_FLI1_FUSION_TOP20_UP	17	0.421383	1.23632	0.161692	0.605722	1	1021	tags=24%, list=5%, signal=25%
WATANABE_COLON_CANCER_MSI_VS_MSS_DN	58	0.315586	1.23615	0.148256	0.604334	1	3468	tags=26%, list=16%, signal=31%
HASLINGER_B_CLL_WITH_CHROMOSOME_12_TRISOMY	20	0.405802	1.2358	0.18617	0.603492	1	3141	tags=25%, list=14%, signal=29%
DAZARD_UV_RESPONSE_CLUSTER_G28	15	0.445461	1.23541	0.19598	0.602782	1	3535	tags=40%, list=16%, signal=48%
HOFMANN_MYELODYSPLASTIC_SYNDROM_RISK_UP	17	0.423714	1.23476	0.179803	0.602727	1	1536	tags=24%, list=7%, signal=25%
KALMA_E2F1_TARGETS	11	0.488528	1.23311	0.2275	0.605844	1	6547	tags=64%, list=30%, signal=91%
GERHOLD_ADIPOGENESIS_DN	56	0.314271	1.2326	0.11831	0.605375	1	4266	tags=29%, list=19%, signal=35%
KIM_WT1_TARGETS_8HR_UP	143	0.269529	1.23094	0.0807692	0.608294	1	3496	tags=20%, list=16%, signal=24%
WAGSCHAL_EHMT2_TARGETS_UP	11	0.480456	1.23049	0.218137	0.607718	1	2267	tags=36%, list=10%, signal=41%
RASHI_RESPONSE_TO_IONIZING_RADIATION_3	39	0.335923	1.22961	0.131443	0.608309	1	2972	tags=26%, list=14%, signal=30%
GRAESSMANN_RESPONSE_TO_MC_AND_DOXORUBICIN_DN	589	0.229915	1.22841	0.00943396	0.610051	1	5363	tags=27%, list=24%, signal=35%
SATO_SILENCED_EPIGENETICALLY_IN_PANCREATIC_CANCER	34	0.363725	1.2277	0.169399	0.610387	1	2476	tags=26%, list=11%, signal=30%
MARTINEZ_RB1_AND_TP53_TARGETS_DN	466	0.235076	1.22615	0.0215827	0.613155	1	4370	tags=24%, list=20%, signal=29%
BANDRES_RESPONSE_TO_CARMUSTIN_MGMT_24HR_DN	31	0.364492	1.2259	0.166667	0.612011	1	6832	tags=48%, list=31%, signal=70%
HUPER_BREAST_BASAL_VS_LUMINAL_UP	42	0.331066	1.22589	0.159091	0.610201	1	4017	tags=38%, list=18%, signal=47%
DORN_ADENOVIRUS_INFECTION_24HR_UP	10	0.479514	1.22526	0.224096	0.610259	1	2410	tags=30%, list=11%, signal=34%
FIGUEROA_AML_METHYLATION_CLUSTER_4_DN	11	0.474106	1.22485	0.20331	0.60956	1	1744	tags=18%, list=8%, signal=20%
MIKKELSEN_MCV6_ICP_WITH_H3K27ME3	51	0.319976	1.22469	0.147059	0.608149	1	2244	tags=25%, list=10%, signal=28%
WEBER_METHYLATED_HCP_IN_SPERM_UP	16	0.418687	1.22459	0.206731	0.606656	1	4604	tags=38%, list=21%, signal=47%
GARGALOVIC_RESPONSE_TO_OXIDIZED_PHOSPHOLIPIDS_BLUE_UP	88	0.287934	1.22454	0.109091	0.605012	1	4898	tags=34%, list=22%, signal=44%
MEISSNER_BRAIN_HCP_WITH_H3K4ME3_AND_H3K27ME3	870	0.222123	1.22398	0	0.60475	1	2356	tags=17%, list=11%, signal=18%
HARRIS_HYPOXIA	69	0.304523	1.22271	0.107256	0.606586	1	3475	tags=35%, list=16%, signal=41%
AMUNDSON_RESPONSE_TO_ARSENITE	170	0.261434	1.22207	0.0598291	0.606798	1	3875	tags=23%, list=18%, signal=28%
KRIGE_RESPONSE_TO_TOSEDOSTAT_6HR_DN	641	0.229038	1.22163	0.00900901	0.60629	1	5402	tags=31%, list=25%, signal=39%
BRUNEAU_SEPTATION_ATRIAL	5	0.586096	1.22003	0.244898	0.609314	1	5379	tags=60%, list=25%, signal=80%
DOANE_BREAST_CANCER_ESR1_DN	40	0.338653	1.21952	0.161473	0.609074	1	3702	tags=33%, list=17%, signal=39%
SCHAEFFER_SOX9_TARGETS_IN_PROSTATE_DEVELOPMENT_UP	20	0.401062	1.21857	0.195929	0.609989	1	4657	tags=40%, list=21%, signal=51%
DIRMEIER_LMP1_RESPONSE_LATE_UP	51	0.318888	1.21842	0.138504	0.608744	1	5224	tags=37%, list=24%, signal=49%
RAMPON_ENRICHED_LEARNING_ENVIRONMENT_LATE_UP	20	0.396278	1.2167	0.208038	0.612205	1	1	tags=5%, list=0%, signal=5%
WANG_ESOPHAGUS_CANCER_VS_NORMAL_DN	89	0.289835	1.21643	0.100334	0.611226	1	3858	tags=27%, list=18%, signal=33%
VERNELL_RETINOBLASTOMA_PATHWAY_UP	56	0.312913	1.21631	0.155629	0.609824	1	7180	tags=45%, list=33%, signal=66%
AMIT_SERUM_RESPONSE_480_MCF10A	29	0.367261	1.21545	0.187675	0.610546	1	6796	tags=52%, list=31%, signal=75%
AMIT_DELAYED_EARLY_GENES	17	0.425656	1.21477	0.21164	0.610867	1	4461	tags=41%, list=20%, signal=52%
KIM_WT1_TARGETS_UP	180	0.257763	1.21296	0.0636704	0.614393	1	5707	tags=31%, list=26%, signal=42%
SESTO_RESPONSE_TO_UV_C6	35	0.344663	1.21171	0.166163	0.616318	1	543	tags=9%, list=2%, signal=9%
LASTOWSKA_COAMPLIFIED_WITH_MYCN	30	0.357255	1.21136	0.17027	0.615684	1	1076	tags=13%, list=5%, signal=14%
YANG_BREAST_CANCER_ESR1_DN	22	0.386882	1.21072	0.187013	0.61581	1	3457	tags=23%, list=16%, signal=27%
TONKS_TARGETS_OF_RUNX1_RUNX1T1_FUSION_MONOCYTE_UP	162	0.262961	1.20973	0.0646552	0.616869	1	3296	tags=23%, list=15%, signal=27%
MIKKELSEN_MEF_ICP_WITH_H3K4ME3_AND_H3K27ME3	32	0.352701	1.20938	0.179894	0.616181	1	1321	tags=19%, list=6%, signal=20%
DELLA_RESPONSE_TO_TSA_AND_BUTYRATE	21	0.394401	1.20827	0.206718	0.617909	1	4817	tags=38%, list=22%, signal=49%
MONNIER_POSTRADIATION_TUMOR_ESCAPE_UP	296	0.240064	1.20804	0.0430622	0.616821	1	4724	tags=28%, list=22%, signal=35%
SEKI_INFLAMMATORY_RESPONSE_LPS_UP	69	0.295791	1.20787	0.141447	0.615611	1	5767	tags=46%, list=26%, signal=63%
LIU_IL13_PRIMING_MODEL	11	0.482721	1.20778	0.234339	0.614155	1	2896	tags=36%, list=13%, signal=42%
HU_GENOTOXIC_DAMAGE_4HR	29	0.360487	1.20745	0.209632	0.613412	1	3875	tags=21%, list=18%, signal=25%
PUJANA_BRCA1_PCC_NETWORK	1316	0.213784	1.20731	0	0.612241	1	5621	tags=28%, list=26%, signal=36%
WANG_ADIPOGENIC_GENES_REPRESSED_BY_SIRT1	22	0.38532	1.2071	0.212658	0.611186	1	2387	tags=27%, list=11%, signal=31%
SCHLOSSER_MYC_AND_SERUM_RESPONSE_SYNERGY	29	0.363917	1.20648	0.184275	0.611208	1	7142	tags=41%, list=33%, signal=61%
GENTILE_UV_RESPONSE_CLUSTER_D7	35	0.342906	1.20635	0.213904	0.609928	1	4703	tags=31%, list=21%, signal=40%
TESAR_ALK_TARGETS_HUMAN_ES_5D_UP	5	0.598433	1.20607	0.281623	0.609089	1	1400	tags=40%, list=6%, signal=43%
HINATA_NFKB_TARGETS_KERATINOCYTE_DN	15	0.418802	1.20433	0.247573	0.61278	1	2272	tags=47%, list=10%, signal=52%
BEGUM_TARGETS_OF_PAX3_FOXO1_FUSION_DN	41	0.336302	1.20383	0.188482	0.612606	1	3812	tags=32%, list=17%, signal=38%
FUJII_YBX1_TARGETS_DN	175	0.258457	1.20173	0.0972763	0.617101	1	7102	tags=42%, list=32%, signal=62%
DAVIES_MULTIPLE_MYELOMA_VS_MGUS_UP	11	0.467843	1.20135	0.263285	0.616532	1	4683	tags=45%, list=21%, signal=58%
YIH_RESPONSE_TO_ARSENITE_C1	23	0.381855	1.19909	0.21393	0.621431	1	4073	tags=39%, list=19%, signal=48%
IIZUKA_LIVER_CANCER_PROGRESSION_G1_G2_DN	22	0.375617	1.19908	0.205882	0.619768	1	4946	tags=36%, list=23%, signal=47%
RIZ_ERYTHROID_DIFFERENTIATION_HEMGN	28	0.363716	1.19893	0.188406	0.618494	1	2483	tags=25%, list=11%, signal=28%
MATHEW_FANCONI_ANEMIA_GENES	10	0.474812	1.19831	0.243309	0.618614	1	1130	tags=20%, list=5%, signal=21%
DER_IFN_BETA_RESPONSE_DN	7	0.537659	1.19754	0.259594	0.619355	1	4651	tags=43%, list=21%, signal=54%
NIKOLSKY_BREAST_CANCER_16Q24_AMPLICON	31	0.352743	1.19736	0.221918	0.618229	1	6138	tags=48%, list=28%, signal=67%
TRAYNOR_RETT_SYNDROM_UP	36	0.334063	1.19649	0.170799	0.619087	1	740	tags=19%, list=3%, signal=20%
BURTON_ADIPOGENESIS_1	30	0.354078	1.19633	0.201995	0.61787	1	3005	tags=23%, list=14%, signal=27%
BROWNE_HCMV_INFECTION_8HR_UP	86	0.284128	1.19532	0.131148	0.619417	1	3247	tags=22%, list=15%, signal=26%
KOHOUTEK_CCNT1_TARGETS	39	0.332271	1.19476	0.181818	0.619453	1	3702	tags=36%, list=17%, signal=43%
KYNG_ENVIRONMENTAL_STRESS_RESPONSE_NOT_BY_4NQO_IN_OLD	11	0.470436	1.19449	0.252796	0.618663	1	5361	tags=45%, list=24%, signal=60%
KAMIKUBO_MYELOID_CEBPA_NETWORK	27	0.366715	1.1941	0.204545	0.618157	1	2107	tags=22%, list=10%, signal=25%
WEBER_METHYLATED_LCP_IN_FIBROBLAST_UP	11	0.461265	1.19367	0.242762	0.617755	1	800	tags=27%, list=4%, signal=28%
WILLIAMS_ESR2_TARGETS_DN	10	0.461428	1.19351	0.23445	0.616671	1	4640	tags=30%, list=21%, signal=38%
CAFFAREL_RESPONSE_TO_THC_8HR_5_DN	6	0.567333	1.19099	0.274468	0.622353	1	4938	tags=67%, list=23%, signal=86%
LIU_BREAST_CANCER	20	0.393398	1.1903	0.2125	0.622732	1	6715	tags=45%, list=31%, signal=65%
BONCI_TARGETS_OF_MIR15A_AND_MIR16_1	82	0.282004	1.1886	0.122257	0.62616	1	4511	tags=28%, list=21%, signal=35%
SCIAN_INVERSED_TARGETS_OF_TP53_AND_TP73_DN	25	0.363142	1.18708	0.194245	0.629392	1	7143	tags=48%, list=33%, signal=71%
DALESSIO_TSA_RESPONSE	18	0.408343	1.18561	0.2175	0.631929	1	6956	tags=67%, list=32%, signal=98%
GAZDA_DIAMOND_BLACKFAN_ANEMIA_ERYTHROID_UP	18	0.400206	1.18541	0.214106	0.630948	1	3739	tags=33%, list=17%, signal=40%
BURTON_ADIPOGENESIS_4	41	0.322208	1.18287	0.180879	0.63712	1	3828	tags=29%, list=17%, signal=35%
JAERVINEN_AMPLIFIED_IN_LARYNGEAL_CANCER	31	0.343308	1.18117	0.223377	0.64066	1	6197	tags=48%, list=28%, signal=67%
LEIN_LOCALIZED_TO_DISTAL_AND_PROXIMAL_DENDRITES	13	0.431605	1.18074	0.248175	0.640267	1	2493	tags=31%, list=11%, signal=35%
RAMJAUN_APOPTOSIS_BY_TGFB1_VIA_SMAD4_DN	8	0.502051	1.17997	0.263789	0.640885	1	677	tags=25%, list=3%, signal=26%
WIERENGA_STAT5A_TARGETS_GROUP1	97	0.274376	1.17842	0.137705	0.643933	1	4139	tags=28%, list=19%, signal=34%
VILIMAS_NOTCH1_TARGETS_DN	19	0.387473	1.1762	0.251799	0.649007	1	3088	tags=32%, list=14%, signal=37%
GALI_TP53_TARGETS_APOPTOTIC_UP	8	0.501286	1.17381	0.289352	0.654789	1	4902	tags=63%, list=22%, signal=81%
GARGALOVIC_RESPONSE_TO_OXIDIZED_PHOSPHOLIPIDS_TURQUOISE_DN	37	0.331978	1.17354	0.209549	0.653969	1	5961	tags=38%, list=27%, signal=52%
DING_LUNG_CANCER_MUTATED_RECURRENTLY	6	0.544989	1.17349	0.265351	0.652481	1	575	tags=17%, list=3%, signal=17%
DORN_ADENOVIRUS_INFECTION_32HR_DN	32	0.346235	1.17306	0.228022	0.652051	1	4274	tags=28%, list=20%, signal=35%
GARY_CD5_TARGETS_DN	332	0.23244	1.17231	0.0481283	0.652618	1	6972	tags=38%, list=32%, signal=55%
LAU_APOPTOSIS_CDKN2A_DN	5	0.566275	1.17127	0.281046	0.654218	1	7187	tags=40%, list=33%, signal=60%
SARTIPY_NORMAL_AT_INSULIN_RESISTANCE_UP	28	0.357743	1.17051	0.226316	0.654927	1	5587	tags=36%, list=26%, signal=48%
ELVIDGE_HYPOXIA_DN	118	0.262713	1.17028	0.150877	0.653945	1	5552	tags=36%, list=25%, signal=49%
HUANG_FOXA2_TARGETS_UP	37	0.325223	1.17022	0.21066	0.652521	1	1902	tags=22%, list=9%, signal=24%
ENK_UV_RESPONSE_EPIDERMIS_UP	241	0.241124	1.16993	0.0688259	0.651773	1	3880	tags=23%, list=18%, signal=28%
FURUKAWA_DUSP6_TARGETS_PCI35_DN	56	0.300088	1.16886	0.186709	0.653375	1	6298	tags=38%, list=29%, signal=53%
GRADE_COLON_CANCER_DN	22	0.371816	1.16784	0.252404	0.654877	1	4462	tags=36%, list=20%, signal=46%
BHATI_G2M_ARREST_BY_2METHOXYESTRADIOL_DN	93	0.273265	1.16643	0.139535	0.657762	1	2371	tags=18%, list=11%, signal=20%
FLECHNER_BIOPSY_KIDNEY_TRANSPLANT_OK_VS_DONOR_DN	20	0.379019	1.16462	0.262774	0.661807	1	6188	tags=50%, list=28%, signal=70%
MEISSNER_NPC_HCP_WITH_H3K4ME2_AND_H3K27ME3	274	0.235864	1.16459	0.0673077	0.660286	1	2425	tags=19%, list=11%, signal=21%
BENPORATH_PROLIFERATION	115	0.262497	1.16326	0.106109	0.662714	1	5682	tags=30%, list=26%, signal=40%
CASTELLANO_HRAS_AND_NRAS_TARGETS_DN	7	0.520109	1.16221	0.305495	0.664374	1	2960	tags=43%, list=14%, signal=50%
YANG_MUC2_TARGETS_DUODENUM_6MO_UP	10	0.474243	1.16086	0.264501	0.666867	1	2524	tags=30%, list=12%, signal=34%
TURASHVILI_BREAST_DUCTAL_CARCINOMA_VS_DUCTAL_NORMAL_DN	138	0.256093	1.15938	0.145594	0.669831	1	3776	tags=26%, list=17%, signal=31%
COULOUARN_TEMPORAL_TGFB1_SIGNATURE_UP	86	0.276345	1.15932	0.177019	0.668374	1	2584	tags=20%, list=12%, signal=22%
MEISSNER_BRAIN_HCP_WITH_H3K27ME3	211	0.240623	1.15793	0.101266	0.671113	1	3001	tags=21%, list=14%, signal=24%
TSENG_IRS1_TARGETS_UP	101	0.26408	1.15761	0.180212	0.670459	1	2189	tags=16%, list=10%, signal=18%
BOYLAN_MULTIPLE_MYELOMA_D_CLUSTER_UP	25	0.356148	1.15387	0.257653	0.680631	1	527	tags=8%, list=2%, signal=8%
CHIANG_LIVER_CANCER_SUBCLASS_POLYSOMY7_UP	61	0.290765	1.1537	0.18806	0.679533	1	2465	tags=20%, list=11%, signal=22%
ASTIER_INTEGRIN_SIGNALING	47	0.308572	1.15284	0.221607	0.680666	1	4114	tags=34%, list=19%, signal=42%
CONRAD_STEM_CELL	36	0.327787	1.15278	0.231552	0.679248	1	3113	tags=28%, list=14%, signal=32%
GRAHAM_CML_DIVIDING_VS_NORMAL_DIVIDING_UP	8	0.482665	1.15151	0.295405	0.681417	1	5153	tags=63%, list=24%, signal=82%
RAMALHO_STEMNESS_UP	170	0.244894	1.15117	0.128906	0.68087	1	4410	tags=22%, list=20%, signal=27%
HOSHIDA_LIVER_CANCER_SURVIVAL_UP	66	0.293986	1.15039	0.198813	0.681695	1	1369	tags=12%, list=6%, signal=13%
PLASARI_TGFB1_TARGETS_10HR_UP	177	0.244718	1.14882	0.148594	0.685068	1	3799	tags=28%, list=17%, signal=33%
MURAKAMI_UV_RESPONSE_6HR_UP	30	0.345517	1.14795	0.253886	0.686181	1	6093	tags=33%, list=28%, signal=46%
ZERBINI_RESPONSE_TO_SULINDAC_UP	7	0.5064	1.14694	0.287257	0.687628	1	2500	tags=29%, list=11%, signal=32%
FRASOR_RESPONSE_TO_SERM_OR_FULVESTRANT_DN	48	0.308162	1.14567	0.233803	0.689899	1	6104	tags=44%, list=28%, signal=61%
WINZEN_DEGRADED_VIA_KHSRP	92	0.268811	1.14529	0.168254	0.689578	1	3510	tags=27%, list=16%, signal=32%
BROWNE_HCMV_INFECTION_10HR_UP	81	0.27165	1.14512	0.190476	0.688476	1	2483	tags=15%, list=11%, signal=17%
WORSCHECH_TUMOR_REJECTION_DN	10	0.459136	1.14502	0.293399	0.687209	1	4335	tags=60%, list=20%, signal=75%
DAZARD_RESPONSE_TO_UV_NHEK_UP	188	0.241251	1.14439	0.151961	0.68768	1	3913	tags=23%, list=18%, signal=28%
FINETTI_BREAST_CANCER_KINOME_GREEN	13	0.428523	1.14436	0.302956	0.686157	1	1907	tags=23%, list=9%, signal=25%
PRAMOONJAGO_SOX4_TARGETS_UP	43	0.319185	1.14415	0.261494	0.685151	1	1896	tags=14%, list=9%, signal=15%
NAGY_PCAF_COMPONENTS_HUMAN	7	0.509048	1.14363	0.303097	0.685187	1	5062	tags=43%, list=23%, signal=56%
IVANOVA_HEMATOPOIESIS_INTERMEDIATE_PROGENITOR	106	0.254506	1.14353	0.196774	0.68392	1	4706	tags=27%, list=21%, signal=35%
NIKOLSKY_BREAST_CANCER_12Q13_Q21_AMPLICON	34	0.328906	1.14332	0.248663	0.683015	1	1646	tags=15%, list=8%, signal=16%
ZWANG_CLASS_1_TRANSIENTLY_INDUCED_BY_EGF	369	0.223475	1.14172	0.0794702	0.686748	1	4876	tags=28%, list=22%, signal=35%
BOYLAN_MULTIPLE_MYELOMA_D_UP	70	0.283234	1.14115	0.200608	0.686982	1	1603	tags=14%, list=7%, signal=15%
TRACEY_RESISTANCE_TO_IFNA2_DN	22	0.364794	1.14108	0.254157	0.685654	1	3451	tags=27%, list=16%, signal=32%
MARTENS_TRETINOIN_RESPONSE_DN	539	0.217687	1.14035	0.0762712	0.686371	1	4122	tags=19%, list=19%, signal=23%
LY_AGING_MIDDLE_UP	13	0.411517	1.14017	0.309693	0.685415	1	1060	tags=31%, list=5%, signal=32%
MAYBURD_RESPONSE_TO_L663536_UP	22	0.372773	1.13847	0.276596	0.689094	1	2569	tags=27%, list=12%, signal=31%
REN_BOUND_BY_E2F	53	0.292841	1.13837	0.241982	0.687851	1	7863	tags=49%, list=36%, signal=76%
COLDREN_GEFITINIB_RESISTANCE_DN	164	0.245627	1.13816	0.161157	0.686957	1	3840	tags=26%, list=18%, signal=32%
ZHU_SKIL_TARGETS_UP	17	0.387596	1.13717	0.304136	0.68857	1	3433	tags=47%, list=16%, signal=56%
CHEN_HOXA5_TARGETS_6HR_UP	9	0.468546	1.13647	0.294664	0.689198	1	5364	tags=44%, list=25%, signal=59%
MCCOLLUM_GELDANAMYCIN_RESISTANCE_DN	6	0.533497	1.1358	0.322738	0.689779	1	321	tags=33%, list=1%, signal=34%
MIKKELSEN_ES_LCP_WITH_H3K27ME3	12	0.441072	1.1356	0.308458	0.688823	1	620	tags=17%, list=3%, signal=17%
SABATES_COLORECTAL_ADENOMA_UP	96	0.262919	1.13463	0.205788	0.690297	1	3695	tags=28%, list=17%, signal=34%
GOBERT_OLIGODENDROCYTE_DIFFERENTIATION_UP	422	0.219194	1.13432	0.0633803	0.689724	1	6424	tags=36%, list=29%, signal=50%
ZAIDI_OSTEOBLAST_TRANSCRIPTION_FACTORS	12	0.423274	1.13405	0.298851	0.689033	1	1967	tags=25%, list=9%, signal=27%
DAIRKEE_CANCER_PRONE_RESPONSE_BPA	42	0.30963	1.13358	0.272251	0.68893	1	5064	tags=36%, list=23%, signal=46%
KOBAYASHI_RESPONSE_TO_ROMIDEPSIN	15	0.406207	1.13358	0.289926	0.687422	1	660	tags=13%, list=3%, signal=14%
LEE_LIVER_CANCER_E2F1_DN	53	0.297014	1.13351	0.239766	0.686102	1	1742	tags=19%, list=8%, signal=20%
DORN_ADENOVIRUS_INFECTION_32HR_UP	10	0.452056	1.13291	0.328321	0.686551	1	2097	tags=30%, list=10%, signal=33%
LABBE_TARGETS_OF_TGFB1_AND_WNT3A_DN	94	0.265335	1.13262	0.221854	0.685939	1	4466	tags=31%, list=20%, signal=39%
KUMAMOTO_RESPONSE_TO_NUTLIN_3A_UP	8	0.473407	1.1311	0.325527	0.689194	1	2347	tags=38%, list=11%, signal=42%
MARTINEZ_TP53_TARGETS_DN	469	0.21593	1.12959	0.0939597	0.692538	1	4370	tags=23%, list=20%, signal=28%
SETLUR_PROSTATE_CANCER_TMPRSS2_ERG_FUSION_DN	18	0.375385	1.12889	0.27	0.693206	1	747	tags=17%, list=3%, signal=17%
SHAFFER_IRF4_TARGETS_IN_MYELOMA_VS_MATURE_B_LYMPHOCYTE	93	0.261808	1.12863	0.2	0.692481	1	2791	tags=17%, list=13%, signal=20%
HOEGERKORP_CD44_TARGETS_DIRECT_DN	10	0.451532	1.12722	0.306413	0.695625	1	7410	tags=70%, list=34%, signal=106%
DEURIG_T_CELL_PROLYMPHOCYTIC_LEUKEMIA_UP	282	0.227487	1.12601	0.14	0.698077	1	3004	tags=21%, list=14%, signal=24%
BROWNE_HCMV_INFECTION_14HR_UP	121	0.25758	1.12591	0.180887	0.696919	1	3933	tags=21%, list=18%, signal=26%
CROMER_METASTASIS_DN	68	0.274593	1.12472	0.218069	0.699258	1	5376	tags=32%, list=25%, signal=43%
HERNANDEZ_ABERRANT_MITOSIS_BY_DOCETACEL_4NM_DN	7	0.512732	1.12433	0.336264	0.698942	1	2948	tags=43%, list=13%, signal=50%
PIONTEK_PKD1_TARGETS_UP	30	0.340937	1.12293	0.287791	0.701952	1	2740	tags=30%, list=13%, signal=34%
AUNG_GASTRIC_CANCER	38	0.312879	1.1217	0.252033	0.704433	1	3695	tags=24%, list=17%, signal=28%
MIZUKAMI_HYPOXIA_UP	8	0.478781	1.12155	0.331878	0.703411	1	5430	tags=63%, list=25%, signal=83%
GRADE_COLON_AND_RECTAL_CANCER_UP	225	0.228904	1.1212	0.162281	0.703034	1	6228	tags=36%, list=28%, signal=50%
ZHANG_TLX_TARGETS_DN	92	0.265049	1.12114	0.215385	0.701756	1	2390	tags=20%, list=11%, signal=22%
GENTILE_UV_HIGH_DOSE_DN	251	0.230227	1.12101	0.145923	0.70065	1	5376	tags=28%, list=25%, signal=37%
STEGMEIER_PRE-MITOTIC_CELL_CYCLE_REGULATORS	9	0.446841	1.1189	0.311751	0.705928	1	6635	tags=56%, list=30%, signal=80%
DONATO_CELL_CYCLE_TRETINOIN	6	0.529904	1.11878	0.331849	0.704769	1	708	tags=33%, list=3%, signal=34%
SANSOM_APC_TARGETS	156	0.243716	1.11846	0.199248	0.704395	1	3770	tags=25%, list=17%, signal=30%
RICKMAN_TUMOR_DIFFERENTIATED_WELL_VS_POORLY_DN	271	0.224492	1.11704	0.12234	0.707498	1	4813	tags=28%, list=22%, signal=36%
MYLLYKANGAS_AMPLIFICATION_HOT_SPOT_7	6	0.50874	1.11599	0.366013	0.709339	1	3828	tags=33%, list=17%, signal=40%
LUI_TARGETS_OF_PAX8_PPARG_FUSION	24	0.35036	1.11584	0.265823	0.708389	1	6256	tags=29%, list=29%, signal=41%
AIGNER_ZEB1_TARGETS	30	0.332395	1.11467	0.304348	0.71067	1	6304	tags=43%, list=29%, signal=61%
LEE_CALORIE_RESTRICTION_MUSCLE_DN	46	0.297165	1.11416	0.279661	0.710781	1	4942	tags=28%, list=23%, signal=36%
SU_PLACENTA	21	0.365572	1.11354	0.294271	0.711285	1	1993	tags=29%, list=9%, signal=31%
ZWANG_DOWN_BY_2ND_EGF_PULSE	106	0.251505	1.11172	0.235495	0.715564	1	4089	tags=24%, list=19%, signal=29%
LIU_CDX2_TARGETS_UP	34	0.321144	1.11115	0.267045	0.715882	1	3042	tags=29%, list=14%, signal=34%
VANDESLUIS_COMMD1_TARGETS_GROUP_2_UP	11	0.43899	1.11001	0.329545	0.718013	1	1053	tags=18%, list=5%, signal=19%
GARGALOVIC_RESPONSE_TO_OXIDIZED_PHOSPHOLIPIDS_GREEN_UP	16	0.400338	1.10937	0.290398	0.718413	1	296	tags=13%, list=1%, signal=13%
UZONYI_RESPONSE_TO_LEUKOTRIENE_AND_THROMBIN	33	0.323155	1.10926	0.320955	0.717281	1	5990	tags=48%, list=27%, signal=67%
KORKOLA_SEMINOMA_UP	34	0.316461	1.10778	0.268734	0.720576	1	1663	tags=15%, list=8%, signal=16%
PYEON_CANCER_HEAD_AND_NECK_VS_CERVICAL_DN	21	0.359079	1.10683	0.292621	0.7221	1	2989	tags=33%, list=14%, signal=39%
LEE_LIVER_CANCER_MYC_TGFA_DN	57	0.288206	1.10607	0.268012	0.723105	1	2010	tags=21%, list=9%, signal=23%
FAELT_B_CLL_WITH_VH3_21_UP	35	0.318037	1.10602	0.298942	0.721789	1	4020	tags=29%, list=18%, signal=35%
ZHAN_MULTIPLE_MYELOMA_CD2_DN	37	0.31766	1.10555	0.298429	0.721788	1	3501	tags=30%, list=16%, signal=35%
ZHAN_MULTIPLE_MYELOMA_UP	54	0.280978	1.10497	0.230548	0.722235	1	3628	tags=26%, list=17%, signal=31%
HASLINGER_B_CLL_WITH_17P13_DELETION	19	0.368144	1.10398	0.315657	0.724041	1	1662	tags=16%, list=8%, signal=17%
XU_CREBBP_TARGETS_DN	36	0.321341	1.10193	0.294618	0.729209	1	3089	tags=22%, list=14%, signal=26%
WU_APOPTOSIS_BY_CDKN1A_VIA_TP53	41	0.298922	1.10193	0.274869	0.727743	1	5284	tags=34%, list=24%, signal=45%
MIKKELSEN_IPS_WITH_HCP_H3K27ME3	80	0.26222	1.10043	0.270358	0.731093	1	2498	tags=23%, list=11%, signal=25%
VANDESLUIS_COMMD1_TARGETS_GROUP_3_UP	73	0.267134	1.09973	0.252459	0.731877	1	3544	tags=25%, list=16%, signal=29%
PEDERSEN_METASTASIS_BY_ERBB2_ISOFORM_4	82	0.26083	1.09919	0.280967	0.732137	1	2948	tags=23%, list=13%, signal=27%
COLLER_MYC_TARGETS_DN	7	0.480765	1.09749	0.363636	0.736221	1	2267	tags=43%, list=10%, signal=48%
LIN_NPAS4_TARGETS_DN	58	0.279189	1.09531	0.286111	0.741909	1	5507	tags=43%, list=25%, signal=57%
DODD_NASOPHARYNGEAL_CARCINOMA_DN	970	0.19695	1.09514	0.0634921	0.740962	1	5077	tags=26%, list=23%, signal=32%
KYNG_RESPONSE_TO_H2O2	62	0.277821	1.09478	0.274788	0.740623	1	4669	tags=26%, list=21%, signal=33%
HELLER_HDAC_TARGETS_SILENCED_BY_METHYLATION_DN	222	0.223992	1.09439	0.179825	0.74044	1	2323	tags=15%, list=11%, signal=16%
JUBAN_TARGETS_OF_SPI1_AND_FLI1_DN	73	0.265751	1.09434	0.258523	0.739183	1	6216	tags=38%, list=28%, signal=53%
SESTO_RESPONSE_TO_UV_C0	94	0.255105	1.09432	0.253378	0.737807	1	6179	tags=37%, list=28%, signal=52%
CHUANG_OXIDATIVE_STRESS_RESPONSE_UP	24	0.33657	1.09403	0.313775	0.73735	1	3999	tags=38%, list=18%, signal=46%
BARRIER_CANCER_RELAPSE_NORMAL_SAMPLE_DN	22	0.352655	1.09372	0.312655	0.736871	1	5344	tags=41%, list=24%, signal=54%
BYSTROEM_CORRELATED_WITH_IL5_UP	49	0.291431	1.0921	0.307494	0.740727	1	5583	tags=37%, list=26%, signal=49%
ACEVEDO_METHYLATED_IN_LIVER_CANCER_DN	497	0.205733	1.09199	0.130137	0.739624	1	3244	tags=20%, list=15%, signal=22%
WANG_NEOPLASTIC_TRANSFORMATION_BY_CCND1_MYC	19	0.363232	1.09084	0.323155	0.742066	1	2500	tags=21%, list=11%, signal=24%
CERIBELLI_GENES_INACTIVE_AND_BOUND_BY_NFY	24	0.346551	1.09046	0.351899	0.741818	1	4931	tags=50%, list=23%, signal=64%
LEE_LIVER_CANCER_SURVIVAL_DN	137	0.239516	1.09013	0.264591	0.741518	1	5932	tags=26%, list=27%, signal=35%
MAHADEVAN_RESPONSE_TO_MP470_UP	13	0.407275	1.08977	0.340961	0.741302	1	3108	tags=38%, list=14%, signal=45%
KREPPEL_CD99_TARGETS_UP	5	0.52824	1.08977	0.367391	0.739867	1	6917	tags=40%, list=32%, signal=58%
AMIT_EGF_RESPONSE_40_MCF10A	17	0.370715	1.0893	0.313433	0.739926	1	7628	tags=65%, list=35%, signal=99%
ZHANG_TLX_TARGETS_36HR_DN	145	0.239225	1.08917	0.24735	0.73891	1	6420	tags=34%, list=29%, signal=48%
BENPORATH_MYC_TARGETS_WITH_EBOX	197	0.226229	1.08891	0.195833	0.738318	1	3859	tags=22%, list=18%, signal=26%
KOINUMA_TARGETS_OF_SMAD2_OR_SMAD3	644	0.20555	1.08607	0.12037	0.746178	1	4166	tags=22%, list=19%, signal=26%
SOTIRIOU_BREAST_CANCER_GRADE_1_VS_3_UP	117	0.246622	1.08565	0.285211	0.746219	1	7093	tags=39%, list=32%, signal=58%
TIEN_INTESTINE_PROBIOTICS_24HR_DN	169	0.232175	1.08494	0.240157	0.747119	1	3170	tags=13%, list=14%, signal=15%
CHOI_ATL_CHRONIC_VS_ACUTE_DN	15	0.384795	1.08485	0.336683	0.746004	1	2646	tags=20%, list=12%, signal=23%
FUJIWARA_PARK2_IN_LIVER_CANCER_DN	5	0.536139	1.08477	0.387528	0.744785	1	3828	tags=80%, list=17%, signal=97%
FUNG_IL2_TARGETS_WITH_STAT5_BINDING_SITES	5	0.535588	1.08421	0.384444	0.745117	1	570	tags=20%, list=3%, signal=21%
MOREAUX_MULTIPLE_MYELOMA_BY_TACI_DN	127	0.242903	1.08413	0.247387	0.743982	1	5419	tags=31%, list=25%, signal=41%
HILLION_HMGA1_TARGETS	84	0.260268	1.08393	0.268371	0.743267	1	4217	tags=27%, list=19%, signal=34%
RASHI_RESPONSE_TO_IONIZING_RADIATION_4	45	0.296894	1.08295	0.321937	0.74513	1	3899	tags=31%, list=18%, signal=38%
HU_GENOTOXIN_ACTION_DIRECT_VS_INDIRECT_24HR	39	0.304035	1.08279	0.317647	0.744279	1	5369	tags=28%, list=25%, signal=37%
BONOME_OVARIAN_CANCER_POOR_SURVIVAL_DN	16	0.362482	1.08177	0.339332	0.74605	1	6512	tags=50%, list=30%, signal=71%
OUELLET_OVARIAN_CANCER_INVASIVE_VS_LMP_UP	102	0.248028	1.08159	0.275862	0.745258	1	5520	tags=25%, list=25%, signal=34%
KANG_CISPLATIN_RESISTANCE_DN	5	0.519644	1.08154	0.369427	0.744021	1	1975	tags=40%, list=9%, signal=44%
SHEN_SMARCA2_TARGETS_DN	229	0.222135	1.0815	0.21393	0.742746	1	4265	tags=28%, list=19%, signal=34%
DACOSTA_UV_RESPONSE_VIA_ERCC3_COMMON_UP	62	0.269098	1.08093	0.292169	0.743256	1	4470	tags=24%, list=20%, signal=30%
OSWALD_HEMATOPOIETIC_STEM_CELL_IN_COLLAGEN_GEL_UP	190	0.232293	1.08085	0.256098	0.742112	1	6367	tags=35%, list=29%, signal=49%
LAMB_CCND1_TARGETS	16	0.371307	1.08055	0.3575	0.741752	1	2868	tags=31%, list=13%, signal=36%
EBAUER_TARGETS_OF_PAX3_FOXO1_FUSION_DN	33	0.311548	1.07871	0.354108	0.746465	1	3369	tags=27%, list=15%, signal=32%
LEE_LIVER_CANCER_MYC_E2F1_DN	57	0.277349	1.07838	0.324324	0.746225	1	2010	tags=19%, list=9%, signal=21%
YAO_TEMPORAL_RESPONSE_TO_PROGESTERONE_CLUSTER_10	54	0.280102	1.07835	0.295858	0.744942	1	7052	tags=43%, list=32%, signal=63%
GRADE_COLON_AND_RECTAL_CANCER_DN	73	0.263184	1.07667	0.296417	0.74904	1	902	tags=11%, list=4%, signal=11%
MAEKAWA_ATF2_TARGETS	22	0.346714	1.07649	0.342318	0.748282	1	972	tags=14%, list=4%, signal=14%
DORN_ADENOVIRUS_INFECTION_48HR_UP	13	0.394063	1.0758	0.339492	0.749243	1	2097	tags=23%, list=10%, signal=26%
DURCHDEWALD_SKIN_CARCINOGENESIS_UP	62	0.268983	1.07547	0.298667	0.748985	1	2563	tags=19%, list=12%, signal=22%
KIM_WT1_TARGETS_12HR_UP	127	0.242185	1.07536	0.284672	0.747914	1	3433	tags=24%, list=16%, signal=29%
FARMER_BREAST_CANCER_CLUSTER_4	14	0.390196	1.07491	0.354369	0.74797	1	5191	tags=50%, list=24%, signal=66%
MIKKELSEN_MEF_LCP_WITH_H3K27ME3	52	0.283947	1.07483	0.308411	0.746886	1	4544	tags=38%, list=21%, signal=48%
SONG_TARGETS_OF_IE86_CMV_PROTEIN	52	0.279482	1.07353	0.321767	0.7497	1	7361	tags=56%, list=34%, signal=84%
ABE_VEGFA_TARGETS_30MIN	27	0.328871	1.07346	0.344913	0.748527	1	5022	tags=37%, list=23%, signal=48%
RICKMAN_METASTASIS_DN	202	0.224121	1.07246	0.263598	0.750472	1	3531	tags=19%, list=16%, signal=22%
ELVIDGE_HIF1A_TARGETS_UP	51	0.286834	1.07235	0.342618	0.74948	1	5961	tags=41%, list=27%, signal=56%
HOFFMANN_PRE_BI_TO_LARGE_PRE_BII_LYMPHOCYTE_UP	31	0.312049	1.07147	0.328042	0.750916	1	6136	tags=42%, list=28%, signal=58%
HUANG_DASATINIB_RESISTANCE_UP	69	0.265072	1.07125	0.338509	0.750277	1	3746	tags=26%, list=17%, signal=31%
KORKOLA_EMBRYONIC_CARCINOMA_VS_SEMINOMA_DN	19	0.365758	1.07107	0.369193	0.749574	1	3818	tags=42%, list=17%, signal=51%
ZHAN_EARLY_DIFFERENTIATION_GENES_DN	37	0.29697	1.07082	0.314961	0.749038	1	4928	tags=32%, list=23%, signal=42%
DACOSTA_LOW_DOSE_UV_RESPONSE_VIA_ERCC3_XPCS_UP	13	0.4044	1.06925	0.35567	0.752815	1	2945	tags=31%, list=13%, signal=36%
BRACHAT_RESPONSE_TO_METHOTREXATE_UP	20	0.345485	1.06834	0.367021	0.754504	1	3720	tags=25%, list=17%, signal=30%
SAFFORD_T_LYMPHOCYTE_ANERGY	78	0.257235	1.06818	0.314935	0.753657	1	3498	tags=24%, list=16%, signal=29%
SATO_SILENCED_BY_METHYLATION_IN_PANCREATIC_CANCER_2	40	0.292953	1.06771	0.337838	0.75389	1	2463	tags=20%, list=11%, signal=22%
YOKOE_CANCER_TESTIS_ANTIGENS	26	0.327403	1.0675	0.353261	0.753225	1	1578	tags=19%, list=7%, signal=21%
GRAHAM_NORMAL_QUIESCENT_VS_NORMAL_DIVIDING_DN	69	0.260886	1.06625	0.310241	0.755968	1	5551	tags=32%, list=25%, signal=43%
TERAMOTO_OPN_TARGETS_CLUSTER_7	14	0.383394	1.06559	0.360697	0.756819	1	1681	tags=21%, list=8%, signal=23%
KONDO_PROSTATE_CANCER_WITH_H3K27ME3	114	0.241291	1.06529	0.299296	0.756445	1	4322	tags=32%, list=20%, signal=39%
KRIEG_HYPOXIA_NOT_VIA_KDM3A	556	0.200227	1.0648	0.165217	0.756802	1	5229	tags=27%, list=24%, signal=35%
COLDREN_GEFITINIB_RESISTANCE_UP	58	0.274173	1.06476	0.35014	0.755563	1	3132	tags=26%, list=14%, signal=30%
BUDHU_LIVER_CANCER_METASTASIS_UP	6	0.497746	1.0647	0.402778	0.754439	1	2426	tags=33%, list=11%, signal=37%
HEDENFALK_BREAST_CANCER_BRACX_UP	15	0.377824	1.06347	0.37037	0.757131	1	6188	tags=40%, list=28%, signal=56%
CAMPS_COLON_CANCER_COPY_NUMBER_UP	58	0.271036	1.06188	0.341463	0.761102	1	2752	tags=19%, list=13%, signal=22%
FEVR_CTNNB1_TARGETS_UP	525	0.19964	1.06182	0.236364	0.759944	1	2748	tags=16%, list=13%, signal=18%
SCHAEFFER_PROSTATE_DEVELOPMENT_AND_CANCER_BOX5_DN	7	0.459632	1.06124	0.343137	0.760556	1	3358	tags=29%, list=15%, signal=34%
WINTER_HYPOXIA_UP	67	0.264078	1.06064	0.342679	0.761208	1	6648	tags=45%, list=30%, signal=64%
DORN_ADENOVIRUS_INFECTION_12HR_UP	24	0.33139	1.06036	0.357924	0.760805	1	4274	tags=33%, list=20%, signal=41%
MYLLYKANGAS_AMPLIFICATION_HOT_SPOT_8	12	0.405008	1.05923	0.390052	0.763155	1	6079	tags=58%, list=28%, signal=81%
NAKAMURA_METASTASIS_MODEL_UP	32	0.309258	1.05761	0.358491	0.767351	1	4313	tags=31%, list=20%, signal=39%
PASQUALUCCI_LYMPHOMA_BY_GC_STAGE_UP	231	0.219296	1.05656	0.24	0.769542	1	3598	tags=21%, list=16%, signal=25%
WAKASUGI_HAVE_ZNF143_BINDING_SITES	54	0.271964	1.05574	0.307463	0.771041	1	6212	tags=41%, list=28%, signal=57%
LY_AGING_PREMATURE_DN	27	0.31916	1.05555	0.36962	0.770345	1	4798	tags=44%, list=22%, signal=57%
PENG_GLUCOSE_DEPRIVATION_UP	40	0.288217	1.05464	0.344538	0.772093	1	2306	tags=20%, list=11%, signal=22%
DUTTA_APOPTOSIS_VIA_NFKB	28	0.313672	1.05439	0.368557	0.771606	1	4511	tags=36%, list=21%, signal=45%
POTTI_ADRIAMYCIN_SENSITIVITY	60	0.267351	1.05422	0.332278	0.770765	1	5086	tags=32%, list=23%, signal=41%
SMID_BREAST_CANCER_RELAPSE_IN_PLEURA_DN	16	0.364396	1.05415	0.379052	0.769663	1	2622	tags=25%, list=12%, signal=28%
LINDGREN_BLADDER_CANCER_CLUSTER_2A_UP	7	0.478686	1.05376	0.41055	0.76964	1	4779	tags=43%, list=22%, signal=55%
GU_PDEF_TARGETS_DN	20	0.353674	1.05299	0.381074	0.770748	1	1069	tags=20%, list=5%, signal=21%
TOMIDA_METASTASIS_DN	15	0.379056	1.0522	0.381733	0.772086	1	1642	tags=20%, list=8%, signal=22%
DARWICHE_PAPILLOMA_RISK_HIGH_UP	104	0.240099	1.0518	0.313131	0.772139	1	2709	tags=20%, list=12%, signal=23%
PHONG_TNF_RESPONSE_VIA_P38_PARTIAL	141	0.229406	1.05174	0.301653	0.771037	1	5225	tags=32%, list=24%, signal=42%
FIGUEROA_AML_METHYLATION_CLUSTER_2_UP	33	0.298826	1.05126	0.374317	0.771374	1	2019	tags=21%, list=9%, signal=23%
BOYAULT_LIVER_CANCER_SUBCLASS_G123_UP	40	0.291497	1.05117	0.393939	0.770379	1	5058	tags=33%, list=23%, signal=42%
SESTO_RESPONSE_TO_UV_C8	67	0.256588	1.04917	0.340058	0.775749	1	3501	tags=22%, list=16%, signal=27%
THEODOROU_MAMMARY_TUMORIGENESIS	28	0.318675	1.04883	0.343358	0.775529	1	3785	tags=36%, list=17%, signal=43%
MADAN_DPPA4_TARGETS	37	0.293993	1.04883	0.390836	0.774217	1	1436	tags=16%, list=7%, signal=17%
PHONG_TNF_RESPONSE_NOT_VIA_P38	281	0.207908	1.04796	0.287293	0.775717	1	3957	tags=24%, list=18%, signal=29%
FARMER_BREAST_CANCER_CLUSTER_6	12	0.397031	1.04764	0.389908	0.775563	1	258	tags=8%, list=1%, signal=8%
CHESLER_BRAIN_HIGHEST_EXPRESSION	34	0.303022	1.04752	0.37741	0.774661	1	645	tags=9%, list=3%, signal=9%
FIGUEROA_AML_METHYLATION_CLUSTER_4_UP	84	0.250999	1.04696	0.364486	0.775296	1	2109	tags=18%, list=10%, signal=20%
RAMJAUN_APOPTOSIS_BY_TGFB1_VIA_MAPK1_UP	5	0.534608	1.04622	0.42029	0.776481	1	6001	tags=60%, list=27%, signal=83%
WANG_BARRETTS_ESOPHAGUS_AND_ESOPHAGUS_CANCER_DN	30	0.313414	1.04512	0.392371	0.778808	1	1941	tags=20%, list=9%, signal=22%
KYNG_WERNER_SYNDROM_UP	14	0.37704	1.045	0.388626	0.777973	1	7114	tags=50%, list=32%, signal=74%
MEISSNER_NPC_HCP_WITH_H3K27ME3	59	0.261594	1.04496	0.359551	0.776796	1	4130	tags=32%, list=19%, signal=40%
ALFANO_MYC_TARGETS	199	0.222099	1.04481	0.309702	0.775993	1	5064	tags=32%, list=23%, signal=41%
SASSON_RESPONSE_TO_FORSKOLIN_UP	75	0.257575	1.04369	0.350299	0.778579	1	4148	tags=27%, list=19%, signal=33%
MCMURRAY_TP53_HRAS_COOPERATION_RESPONSE_UP	21	0.335323	1.04243	0.396226	0.781554	1	2551	tags=33%, list=12%, signal=38%
LIM_MAMMARY_LUMINAL_MATURE_DN	85	0.250816	1.04234	0.37299	0.780518	1	5509	tags=39%, list=25%, signal=52%
LI_WILMS_TUMOR_VS_FETAL_KIDNEY_1_DN	142	0.231815	1.03898	0.377049	0.790256	1	3734	tags=20%, list=17%, signal=24%
HUMMERICH_MALIGNANT_SKIN_TUMOR_UP	13	0.382282	1.03878	0.399497	0.789576	1	1944	tags=23%, list=9%, signal=25%
MALONEY_RESPONSE_TO_17AAG_DN	65	0.262893	1.03656	0.361516	0.795715	1	7603	tags=45%, list=35%, signal=68%
LUI_THYROID_CANCER_CLUSTER_3	21	0.332608	1.03603	0.39759	0.796109	1	9106	tags=57%, list=42%, signal=98%
CHIBA_RESPONSE_TO_TSA	42	0.28008	1.0342	0.375	0.801059	1	3892	tags=24%, list=18%, signal=29%
SCIBETTA_KDM5B_TARGETS_UP	15	0.371381	1.03415	0.395455	0.799918	1	4057	tags=27%, list=19%, signal=33%
GESERICK_TERT_TARGETS_DN	20	0.348469	1.03384	0.375309	0.799697	1	5654	tags=40%, list=26%, signal=54%
ZWANG_EGF_PERSISTENTLY_UP	18	0.350991	1.03284	0.414118	0.801781	1	1391	tags=17%, list=6%, signal=18%
OSAWA_TNF_TARGETS	7	0.463097	1.03283	0.424242	0.800505	1	1424	tags=29%, list=7%, signal=31%
MARTINEZ_RB1_TARGETS_DN	427	0.19727	1.03176	0.325397	0.802937	1	4038	tags=21%, list=18%, signal=25%
LEE_LIVER_CANCER_MYC_DN	53	0.26788	1.02963	0.382184	0.808838	1	2454	tags=19%, list=11%, signal=21%
BOYLAN_MULTIPLE_MYELOMA_PCA3_UP	62	0.268721	1.02942	0.372434	0.80824	1	2570	tags=18%, list=12%, signal=20%
PUJANA_BRCA_CENTERED_NETWORK	101	0.234083	1.02875	0.376384	0.809088	1	7244	tags=44%, list=33%, signal=65%
PARK_TRETINOIN_RESPONSE_AND_RARA_PLZF_FUSION	21	0.331674	1.02828	0.418421	0.80934	1	1571	tags=19%, list=7%, signal=21%
MOOTHA_HUMAN_MITODB_6_2002	390	0.197742	1.02793	0.356725	0.809211	1	3231	tags=13%, list=15%, signal=15%
IVANOVA_HEMATOPOIESIS_EARLY_PROGENITOR	390	0.198824	1.02614	0.338624	0.813968	1	5176	tags=29%, list=24%, signal=37%
KRISHNAN_FURIN_TARGETS_UP	8	0.442122	1.02524	0.431193	0.815713	1	3475	tags=25%, list=16%, signal=30%
GINESTIER_BREAST_CANCER_20Q13_AMPLIFICATION_DN	116	0.230522	1.02514	0.380282	0.81475	1	5567	tags=32%, list=25%, signal=43%
KAN_RESPONSE_TO_ARSENIC_TRIOXIDE	88	0.240254	1.02479	0.379661	0.814599	1	2005	tags=14%, list=9%, signal=15%
RHODES_UNDIFFERENTIATED_CANCER	61	0.262491	1.02436	0.394366	0.814711	1	5551	tags=34%, list=25%, signal=46%
WANG_IMMORTALIZED_BY_HOXA9_AND_MEIS1_UP	27	0.318077	1.02373	0.403694	0.815557	1	2640	tags=26%, list=12%, signal=29%
MEISSNER_BRAIN_HCP_WITH_H3_UNMETHYLATED	26	0.313035	1.02364	0.410714	0.81451	1	4031	tags=42%, list=18%, signal=52%
HEIDENBLAD_AMPLICON_8Q24_UP	26	0.317916	1.02223	0.386487	0.818197	1	5022	tags=35%, list=23%, signal=45%
RASHI_RESPONSE_TO_IONIZING_RADIATION_1	34	0.292716	1.02114	0.398417	0.820588	1	3582	tags=26%, list=16%, signal=32%
TARTE_PLASMA_CELL_VS_B_LYMPHOCYTE_UP	67	0.252028	1.02025	0.389776	0.822209	1	4727	tags=27%, list=22%, signal=34%
WIERENGA_STAT5A_TARGETS_UP	158	0.222037	1.02005	0.41129	0.821614	1	3804	tags=23%, list=17%, signal=28%
NUTT_GBM_VS_AO_GLIOMA_UP	41	0.286528	1.01925	0.418079	0.823046	1	3289	tags=22%, list=15%, signal=26%
KYNG_RESPONSE_TO_H2O2_VIA_ERCC6_UP	31	0.303999	1.01883	0.406736	0.823163	1	4094	tags=26%, list=19%, signal=32%
WEBER_METHYLATED_LCP_IN_SPERM_DN	6	0.463935	1.01872	0.440191	0.822268	1	1829	tags=33%, list=8%, signal=36%
REICHERT_G1S_REGULATORS_AS_PI3K_TARGETS	8	0.4267	1.01832	0.415704	0.822381	1	7057	tags=63%, list=32%, signal=92%
TAKAYAMA_BOUND_BY_AR	7	0.462291	1.01739	0.440559	0.824198	1	69	tags=14%, list=0%, signal=14%
COATES_MACROPHAGE_M1_VS_M2_DN	55	0.263796	1.01679	0.423197	0.82498	1	3646	tags=25%, list=17%, signal=30%
HOOI_ST7_TARGETS_UP	63	0.256181	1.01582	0.394659	0.82719	1	3433	tags=27%, list=16%, signal=32%
OSADA_ASCL1_TARGETS_UP	42	0.273769	1.01579	0.409341	0.826005	1	2500	tags=24%, list=11%, signal=27%
DIRMEIER_LMP1_RESPONSE_EARLY	60	0.258554	1.01549	0.388102	0.825768	1	4081	tags=23%, list=19%, signal=29%
MASRI_RESISTANCE_TO_TAMOXIFEN_AND_AROMATASE_INHIBITORS_UP	17	0.349447	1.01534	0.411765	0.824963	1	2290	tags=24%, list=10%, signal=26%
NEMETH_INFLAMMATORY_RESPONSE_LPS_DN	28	0.301928	1.01491	0.439086	0.825034	1	4263	tags=36%, list=19%, signal=44%
IWANAGA_CARCINOGENESIS_BY_KRAS_PTEN_UP	132	0.22316	1.01401	0.385666	0.826806	1	3433	tags=20%, list=16%, signal=24%
BOYAULT_LIVER_CANCER_SUBCLASS_G56_DN	14	0.365947	1.01284	0.442455	0.829515	1	1004	tags=21%, list=5%, signal=22%
KIM_GASTRIC_CANCER_CHEMOSENSITIVITY	77	0.246175	1.01269	0.432886	0.828766	1	5038	tags=35%, list=23%, signal=45%
MARTINELLI_IMMATURE_NEUTROPHIL_UP	6	0.462179	1.01266	0.438053	0.827566	1	2803	tags=50%, list=13%, signal=57%
MISSIAGLIA_REGULATED_BY_METHYLATION_DN	98	0.234408	1.01244	0.424242	0.827085	1	6383	tags=34%, list=29%, signal=47%
VARELA_ZMPSTE24_TARGETS_UP	35	0.287287	1.01239	0.415144	0.825971	1	3307	tags=23%, list=15%, signal=27%
MARSON_BOUND_BY_E2F4_UNSTIMULATED	489	0.193847	1.0116	0.366412	0.827374	1	6548	tags=35%, list=30%, signal=48%
BENPORATH_ES_CORE_NINE	8	0.424095	1.01089	0.437939	0.828648	1	4335	tags=50%, list=20%, signal=62%
RIZ_ERYTHROID_DIFFERENTIATION	72	0.249441	1.01036	0.448276	0.829194	1	6574	tags=44%, list=30%, signal=63%
TSUNODA_CISPLATIN_RESISTANCE_DN	39	0.279267	1.0103	0.452128	0.828114	1	3238	tags=31%, list=15%, signal=36%
GROSS_HYPOXIA_VIA_ELK3_AND_HIF1A_UP	116	0.226074	1.0097	0.377289	0.828732	1	4675	tags=25%, list=21%, signal=32%
GRAESSMANN_RESPONSE_TO_MC_AND_SERUM_DEPRIVATION_DN	69	0.249632	1.00788	0.426332	0.833749	1	3927	tags=22%, list=18%, signal=26%
ROPERO_HDAC2_TARGETS	76	0.245126	1.00636	0.446108	0.83775	1	2710	tags=18%, list=12%, signal=21%
FERNANDEZ_BOUND_BY_MYC	158	0.216341	1.00578	0.417004	0.838418	1	3859	tags=22%, list=18%, signal=27%
MARCHINI_TRABECTEDIN_RESISTANCE_DN	46	0.272629	1.00559	0.436364	0.837832	1	2791	tags=24%, list=13%, signal=27%
RICKMAN_TUMOR_DIFFERENTIATED_MODERATELY_VS_POORLY_DN	10	0.400716	1.00496	0.46114	0.838677	1	4867	tags=40%, list=22%, signal=51%
KYNG_NORMAL_AGING_DN	21	0.323778	1.00495	0.458791	0.837449	1	4506	tags=33%, list=21%, signal=42%
WENG_POR_TARGETS_GLOBAL_DN	19	0.336339	1.0036	0.446602	0.84081	1	2261	tags=26%, list=10%, signal=29%
BLALOCK_ALZHEIMERS_DISEASE_INCIPIENT_DN	144	0.21922	1.00353	0.422794	0.839752	1	3979	tags=21%, list=18%, signal=25%
CROONQUIST_NRAS_SIGNALING_DN	62	0.25555	1.00172	0.465517	0.844862	1	6228	tags=39%, list=28%, signal=54%
HEIDENBLAD_AMPLIFIED_IN_BONE_CANCER	7	0.440917	1.00104	0.458904	0.845923	1	4960	tags=43%, list=23%, signal=55%
MOROSETTI_FACIOSCAPULOHUMERAL_MUSCULAR_DISTROPHY_DN	12	0.386458	1.00042	0.443914	0.846749	1	3746	tags=33%, list=17%, signal=40%
PENG_LEUCINE_DEPRIVATION_UP	118	0.221753	1.00006	0.409091	0.846778	1	2306	tags=17%, list=11%, signal=19%
ENGELMANN_CANCER_PROGENITORS_DN	46	0.27081	0.999011	0.437824	0.849131	1	1871	tags=20%, list=9%, signal=21%
ENK_UV_RESPONSE_KERATINOCYTE_UP	444	0.193388	0.99898	0.421769	0.847931	1	3707	tags=16%, list=17%, signal=19%
BOUDOUKHA_BOUND_BY_IGF2BP2	91	0.234908	0.998954	0.45485	0.846737	1	6754	tags=32%, list=31%, signal=46%
BRACHAT_RESPONSE_TO_CAMPTOTHECIN_UP	23	0.321401	0.998654	0.432361	0.846437	1	3720	tags=26%, list=17%, signal=31%
KINSEY_TARGETS_OF_EWSR1_FLII_FUSION_UP	939	0.179359	0.998063	0.419355	0.847197	1	5450	tags=28%, list=25%, signal=35%
CHEN_PDGF_TARGETS	17	0.346576	0.997719	0.467391	0.847123	1	14309	tags=100%, list=65%, signal=288%
LASTOWSKA_NEUROBLASTOMA_COPY_NUMBER_UP	136	0.218943	0.996186	0.462633	0.850969	1	4745	tags=24%, list=22%, signal=30%
AGUIRRE_PANCREATIC_CANCER_COPY_NUMBER_DN	178	0.2124	0.996127	0.473469	0.84988	1	4813	tags=22%, list=22%, signal=28%
CHEBOTAEV_GR_TARGETS_UP	61	0.254778	0.995837	0.467787	0.849621	1	3818	tags=30%, list=17%, signal=36%
SUNG_METASTASIS_STROMA_DN	37	0.286616	0.995729	0.444444	0.848744	1	5137	tags=38%, list=23%, signal=49%
MAGRANGEAS_MULTIPLE_MYELOMA_IGLL_VS_IGLK_DN	19	0.332703	0.995461	0.4578	0.848397	1	1399	tags=21%, list=6%, signal=22%
HUPER_BREAST_BASAL_VS_LUMINAL_DN	45	0.265348	0.994901	0.471591	0.849127	1	3494	tags=27%, list=16%, signal=32%
JAZAERI_BREAST_CANCER_BRCA1_VS_BRCA2_UP	42	0.271935	0.993852	0.441253	0.851417	1	3550	tags=21%, list=16%, signal=26%
LEE_NEURAL_CREST_STEM_CELL_DN	99	0.229728	0.993675	0.490323	0.850751	1	3659	tags=22%, list=17%, signal=27%
DORN_ADENOVIRUS_INFECTION_24HR_DN	37	0.288378	0.993646	0.487252	0.849597	1	4274	tags=27%, list=20%, signal=34%
DARWICHE_SQUAMOUS_CELL_CARCINOMA_UP	105	0.228086	0.993397	0.455108	0.849192	1	3979	tags=25%, list=18%, signal=30%
LIEN_BREAST_CARCINOMA_METAPLASTIC_VS_DUCTAL_UP	69	0.244108	0.993374	0.453804	0.848012	1	3564	tags=26%, list=16%, signal=31%
ZHAN_VARIABLE_EARLY_DIFFERENTIATION_GENES_UP	12	0.388595	0.993108	0.464531	0.84767	1	1394	tags=25%, list=6%, signal=27%
HELLER_HDAC_TARGETS_DN	228	0.20322	0.99298	0.469767	0.846881	1	2935	tags=17%, list=13%, signal=19%
MARTIN_INTERACT_WITH_HDAC	41	0.270047	0.991971	0.443243	0.849081	1	7171	tags=49%, list=33%, signal=72%
QI_PLASMACYTOMA_DN	87	0.229686	0.991915	0.476027	0.848039	1	2325	tags=18%, list=11%, signal=20%
KIM_GLIS2_TARGETS_DN	5	0.493626	0.991798	0.45805	0.847155	1	347	tags=20%, list=2%, signal=20%
KRIEG_KDM3A_TARGETS_NOT_HYPOXIA	147	0.215853	0.991133	0.487179	0.848157	1	3271	tags=17%, list=15%, signal=20%
NAGY_STAGA_COMPONENTS_HUMAN	11	0.389788	0.990583	0.452323	0.848735	1	5062	tags=36%, list=23%, signal=47%
SPIELMAN_LYMPHOBLAST_EUROPEAN_VS_ASIAN_2FC_UP	10	0.395049	0.989971	0.466357	0.849485	1	482	tags=20%, list=2%, signal=20%
SASSON_RESPONSE_TO_GONADOTROPHINS_UP	76	0.234827	0.989941	0.469256	0.848349	1	4148	tags=24%, list=19%, signal=29%
TANG_SENESCENCE_TP53_TARGETS_UP	25	0.310167	0.989194	0.477573	0.849549	1	2425	tags=24%, list=11%, signal=27%
SU_THYMUS	16	0.339875	0.988926	0.448276	0.849156	1	4242	tags=31%, list=19%, signal=39%
VANDESLUIS_COMMD1_TARGETS_GROUP_4_DN	15	0.348939	0.988906	0.478481	0.847969	1	234	tags=13%, list=1%, signal=13%
MARKS_HDAC_TARGETS_UP	20	0.330292	0.988605	0.471591	0.847761	1	5088	tags=50%, list=23%, signal=65%
PURBEY_TARGETS_OF_CTBP1_NOT_SATB1_UP	252	0.201959	0.988505	0.489362	0.846847	1	4287	tags=23%, list=20%, signal=28%
KINNEY_DNMT1_METHYLATION_TARGETS	5	0.487978	0.987978	0.486936	0.847351	1	3044	tags=40%, list=14%, signal=46%
SESTO_RESPONSE_TO_UV_C4	15	0.359222	0.987005	0.453634	0.849349	1	8177	tags=60%, list=37%, signal=96%
KYNG_ENVIRONMENTAL_STRESS_RESPONSE_NOT_BY_4NQO_IN_WS	32	0.283597	0.98663	0.483291	0.849464	1	6366	tags=44%, list=29%, signal=62%
ABRAHAM_ALPC_VS_MULTIPLE_MYELOMA_DN	18	0.329027	0.986419	0.461165	0.84897	1	5695	tags=33%, list=26%, signal=45%
TAKAO_RESPONSE_TO_UVB_RADIATION_DN	83	0.233755	0.984727	0.490566	0.853263	1	5270	tags=27%, list=24%, signal=35%
WACKER_HYPOXIA_TARGETS_OF_VHL	11	0.376458	0.984567	0.455814	0.852533	1	2699	tags=27%, list=12%, signal=31%
BUYTAERT_PHOTODYNAMIC_THERAPY_STRESS_UP	619	0.183199	0.983477	0.57	0.85511	1	3677	tags=16%, list=17%, signal=18%
ELVIDGE_HIF1A_AND_HIF2A_TARGETS_UP	33	0.284778	0.982223	0.492268	0.857989	1	2418	tags=21%, list=11%, signal=24%
MACLACHLAN_BRCA1_TARGETS_DN	13	0.359318	0.98077	0.492857	0.861704	1	1876	tags=23%, list=9%, signal=25%
MODY_HIPPOCAMPUS_NEONATAL	31	0.28427	0.978454	0.482955	0.86822	1	4767	tags=45%, list=22%, signal=58%
TURJANSKI_MAPK1_AND_MAPK2_TARGETS	11	0.378062	0.977225	0.496568	0.871085	1	13618	tags=100%, list=62%, signal=264%
BARIS_THYROID_CANCER_UP	20	0.317906	0.976404	0.507538	0.87247	1	4148	tags=30%, list=19%, signal=37%
HOFFMANN_LARGE_TO_SMALL_PRE_BII_LYMPHOCYTE_UP	135	0.215499	0.975977	0.496403	0.872659	1	6236	tags=34%, list=28%, signal=47%
VICENT_METASTASIS_UP	11	0.372436	0.975501	0.495215	0.872964	1	2547	tags=27%, list=12%, signal=31%
GRATIAS_RETINOBLASTOMA_16Q24	13	0.359677	0.975234	0.502513	0.872578	1	5469	tags=46%, list=25%, signal=61%
GRESHOCK_CANCER_COPY_NUMBER_UP	285	0.194489	0.9737	0.573864	0.876533	1	3949	tags=20%, list=18%, signal=25%
UDAYAKUMAR_MED1_TARGETS_DN	200	0.203398	0.973238	0.547945	0.876855	1	4727	tags=26%, list=22%, signal=32%
AGUIRRE_PANCREATIC_CANCER_COPY_NUMBER_UP	230	0.20166	0.972347	0.573333	0.878594	1	5222	tags=29%, list=24%, signal=38%
WEBER_METHYLATED_ICP_IN_FIBROBLAST	15	0.348094	0.971764	0.506173	0.879405	1	2737	tags=33%, list=13%, signal=38%
SMIRNOV_RESPONSE_TO_IR_6HR_UP	116	0.217334	0.970984	0.527397	0.880681	1	3125	tags=19%, list=14%, signal=22%
LINDGREN_BLADDER_CANCER_CLUSTER_1_DN	305	0.192835	0.970584	0.560847	0.880776	1	5180	tags=29%, list=24%, signal=37%
BILD_HRAS_ONCOGENIC_SIGNATURE	203	0.204967	0.970476	0.542714	0.879922	1	3677	tags=21%, list=17%, signal=25%
LIU_TARGETS_OF_VMYB_VS_CMYB_DN	35	0.270999	0.970104	0.5	0.879942	1	3510	tags=34%, list=16%, signal=41%
TOMIDA_METASTASIS_UP	19	0.318828	0.969899	0.494975	0.879322	1	2551	tags=16%, list=12%, signal=18%
LIAO_HAVE_SOX4_BINDING_SITES	35	0.274131	0.969856	0.504854	0.878221	1	2201	tags=23%, list=10%, signal=25%
ELVIDGE_HYPOXIA_BY_DMOG_DN	47	0.258378	0.969184	0.512329	0.879286	1	3360	tags=26%, list=15%, signal=30%
EHRLICH_ICF_SYNDROM_DN	12	0.371698	0.969103	0.517327	0.878361	1	1755	tags=25%, list=8%, signal=27%
KIM_GERMINAL_CENTER_T_HELPER_DN	14	0.345517	0.966457	0.488263	0.885845	1	3703	tags=21%, list=17%, signal=26%
TERAO_AOX4_TARGETS_SKIN_UP	35	0.278786	0.966041	0.517767	0.885977	1	3629	tags=23%, list=17%, signal=27%
PUJANA_BREAST_CANCER_LIT_INT_NETWORK	93	0.226896	0.965917	0.562712	0.88511	1	6242	tags=33%, list=29%, signal=46%
BRUINS_UVC_RESPONSE_EARLY_LATE	229	0.201228	0.965188	0.576923	0.886339	1	5353	tags=29%, list=24%, signal=38%
WOOD_EBV_EBNA1_TARGETS_UP	99	0.225788	0.96452	0.514658	0.887236	1	4805	tags=28%, list=22%, signal=36%
KIM_PTEN_TARGETS_UP	16	0.337119	0.964166	0.498812	0.887165	1	2267	tags=38%, list=10%, signal=42%
RHODES_CANCER_META_SIGNATURE	56	0.245806	0.963643	0.541547	0.887606	1	2719	tags=14%, list=12%, signal=16%
BOCHKIS_FOXA2_TARGETS	341	0.191199	0.96279	0.604278	0.889165	1	3554	tags=19%, list=16%, signal=22%
KYNG_NORMAL_AGING_UP	12	0.366469	0.960541	0.490521	0.895408	1	7114	tags=50%, list=32%, signal=74%
ZHANG_RESPONSE_TO_IKK_INHIBITOR_AND_TNF_UP	167	0.206783	0.960096	0.584746	0.895672	1	4533	tags=25%, list=21%, signal=31%
DAIRKEE_CANCER_PRONE_RESPONSE_BPA_E2	99	0.222351	0.95923	0.523636	0.897343	1	5008	tags=30%, list=23%, signal=39%
MAGRANGEAS_MULTIPLE_MYELOMA_IGLL_VS_IGLK_UP	38	0.271744	0.959217	0.509485	0.896168	1	4401	tags=34%, list=20%, signal=43%
GARGALOVIC_RESPONSE_TO_OXIDIZED_PHOSPHOLIPIDS_BLACK_UP	27	0.29393	0.958819	0.483291	0.896307	1	3852	tags=26%, list=18%, signal=31%
GUO_TARGETS_OF_IRS1_AND_IRS2	85	0.226761	0.958738	0.577844	0.895336	1	5552	tags=33%, list=25%, signal=44%
LIU_TARGETS_OF_VMYB_VS_CMYB_UP	12	0.36427	0.958607	0.504739	0.894548	1	4694	tags=50%, list=21%, signal=64%
SHAFFER_IRF4_TARGETS_IN_PLASMA_CELL_VS_MATURE_B_LYMPHOCYTE	62	0.240841	0.95846	0.544304	0.893824	1	5229	tags=34%, list=24%, signal=44%
CARDOSO_RESPONSE_TO_GAMMA_RADIATION_AND_3AB	14	0.338763	0.958227	0.496536	0.893405	1	94	tags=7%, list=0%, signal=7%
HESSON_TUMOR_SUPPRESSOR_CLUSTER_3P21_3	6	0.453448	0.957868	0.47981	0.893346	1	6987	tags=83%, list=32%, signal=122%
SENESE_HDAC1_AND_HDAC2_TARGETS_UP	182	0.203468	0.957658	0.577869	0.892832	1	4248	tags=28%, list=19%, signal=34%
PEDERSEN_METASTASIS_BY_ERBB2_ISOFORM_3	13	0.36317	0.957183	0.488665	0.893176	1	4836	tags=54%, list=22%, signal=69%
TOMLINS_METASTASIS_UP	13	0.360814	0.957138	0.497727	0.89212	1	4066	tags=31%, list=19%, signal=38%
JEPSEN_SMRT_TARGETS	30	0.281048	0.957002	0.486413	0.891372	1	1888	tags=20%, list=9%, signal=22%
GENTILE_UV_RESPONSE_CLUSTER_D5	30	0.28636	0.956738	0.512262	0.89105	1	6800	tags=47%, list=31%, signal=68%
AUJLA_IL22_AND_IL17A_SIGNALING	5	0.474105	0.955637	0.503417	0.893425	1	2551	tags=60%, list=12%, signal=68%
CREIGHTON_ENDOCRINE_THERAPY_RESISTANCE_1	391	0.18595	0.955594	0.643312	0.892357	1	4168	tags=23%, list=19%, signal=28%
YANG_BREAST_CANCER_ESR1_LASER_DN	42	0.262756	0.955171	0.528926	0.892635	1	6098	tags=45%, list=28%, signal=63%
WANG_CISPLATIN_RESPONSE_AND_XPC_UP	157	0.204685	0.955094	0.597122	0.891725	1	4083	tags=22%, list=19%, signal=26%
KIM_WT1_TARGETS_12HR_DN	166	0.20329	0.953208	0.598592	0.896747	1	6596	tags=37%, list=30%, signal=52%
STARK_HYPPOCAMPUS_22Q11_DELETION_DN	14	0.349239	0.952182	0.485222	0.898654	1	5580	tags=50%, list=25%, signal=67%
MATZUK_POST-IMPLANTATION_AND_POST-PARTUM	13	0.34645	0.951735	0.509901	0.89893	1	1949	tags=31%, list=9%, signal=34%
RORIE_TARGETS_OF_EWSR1_FLI1_FUSION_UP	22	0.30019	0.951587	0.54712	0.898196	1	6155	tags=50%, list=28%, signal=69%
TANAKA_METHYLATED_IN_ESOPHAGEAL_CARCINOMA	74	0.231632	0.949718	0.590769	0.903194	1	3933	tags=24%, list=18%, signal=30%
GHO_ATF5_TARGETS_DN	14	0.344124	0.949491	0.519722	0.902718	1	6075	tags=50%, list=28%, signal=69%
FONTAINE_FOLLICULAR_THYROID_ADENOMA_UP	55	0.245229	0.948324	0.552561	0.905341	1	3679	tags=25%, list=17%, signal=31%
FONTAINE_FOLLICULAR_THYROID_ADENOMA_DN	52	0.244938	0.947919	0.564841	0.905472	1	3957	tags=31%, list=18%, signal=37%
LIAO_METASTASIS	394	0.184505	0.946863	0.697987	0.90766	1	4272	tags=24%, list=20%, signal=29%
TOMLINS_PROSTATE_CANCER_DN	34	0.273595	0.94551	0.528	0.910678	1	1902	tags=21%, list=9%, signal=23%
MOOTHA_TCA	15	0.331779	0.945413	0.523573	0.909777	1	14632	tags=100%, list=67%, signal=301%
FULCHER_INFLAMMATORY_RESPONSE_LECTIN_VS_LPS_UP	419	0.180447	0.944924	0.681818	0.910057	1	3495	tags=19%, list=16%, signal=22%
MYLLYKANGAS_AMPLIFICATION_HOT_SPOT_27	10	0.375803	0.944661	0.525822	0.909654	1	2849	tags=30%, list=13%, signal=34%
CHEOK_RESPONSE_TO_MERCAPTOPURINE_UP	11	0.370751	0.944641	0.525386	0.908519	1	1576	tags=18%, list=7%, signal=20%
PUJANA_BREAST_CANCER_WITH_BRCA1_MUTATED_UP	47	0.251676	0.942389	0.569697	0.914549	1	6609	tags=49%, list=30%, signal=70%
STOSSI_RESPONSE_TO_ESTRADIOL	41	0.257327	0.942048	0.558011	0.91442	1	902	tags=12%, list=4%, signal=13%
YAO_TEMPORAL_RESPONSE_TO_PROGESTERONE_CLUSTER_5	27	0.286228	0.941544	0.543767	0.914819	1	2500	tags=22%, list=11%, signal=25%
DAVICIONI_PAX_FOXO1_SIGNATURE_IN_ARMS_UP	51	0.24383	0.940992	0.573816	0.915366	1	1872	tags=16%, list=9%, signal=17%
KAUFFMANN_DNA_REPAIR_GENES	202	0.196676	0.940389	0.665198	0.916104	1	5621	tags=30%, list=26%, signal=40%
BOYAULT_LIVER_CANCER_SUBCLASS_G12_UP	33	0.270594	0.940069	0.527705	0.915917	1	478	tags=9%, list=2%, signal=9%
TESAR_JAK_TARGETS_MOUSE_ES_D3_UP	7	0.414002	0.939904	0.504464	0.915248	1	4511	tags=43%, list=21%, signal=54%
ONGUSAHA_BRCA1_TARGETS_DN	13	0.342163	0.937579	0.535885	0.921392	1	2272	tags=15%, list=10%, signal=17%
POTTI_PACLITAXEL_SENSITIVITY	36	0.268336	0.937567	0.566327	0.920232	1	3135	tags=19%, list=14%, signal=23%
LY_AGING_OLD_DN	51	0.246552	0.936989	0.590258	0.920849	1	5064	tags=31%, list=23%, signal=41%
DING_LUNG_CANCER_BY_MUTATION_RATE	19	0.310659	0.936533	0.545455	0.921101	1	3848	tags=37%, list=18%, signal=45%
MCCABE_HOXC6_TARGETS_UP	7	0.41239	0.935303	0.544248	0.923807	1	4241	tags=29%, list=19%, signal=35%
IKEDA_MIR1_TARGETS_DN	6	0.428583	0.93204	0.527523	0.932846	1	4678	tags=50%, list=21%, signal=64%
JIANG_VHL_TARGETS	97	0.215815	0.930819	0.604575	0.935524	1	3730	tags=20%, list=17%, signal=24%
GHANDHI_BYSTANDER_IRRADIATION_DN	8	0.397627	0.930327	0.543779	0.935807	1	4887	tags=63%, list=22%, signal=80%
LUI_THYROID_CANCER_PAX8_PPARG_UP	32	0.273258	0.929508	0.557292	0.937108	1	5376	tags=38%, list=25%, signal=50%
WANG_THOC1_TARGETS_DN	19	0.310719	0.928556	0.57732	0.938853	1	2943	tags=21%, list=13%, signal=24%
UEDA_CENTRAL_CLOCK	77	0.22245	0.928233	0.64497	0.938645	1	5990	tags=38%, list=27%, signal=52%
PELLICCIOTTA_HDAC_IN_ANTIGEN_PRESENTATION_UP	57	0.235983	0.927865	0.610119	0.938602	1	6217	tags=37%, list=28%, signal=51%
CONCANNON_APOPTOSIS_BY_EPOXOMICIN_UP	184	0.19844	0.927234	0.738938	0.939307	1	3608	tags=20%, list=16%, signal=24%
AMIT_EGF_RESPONSE_60_HELA	36	0.26804	0.926969	0.571053	0.938951	1	5520	tags=33%, list=25%, signal=44%
BANDRES_RESPONSE_TO_CARMUSTIN_MGMT_48HR_DN	138	0.201343	0.925889	0.676259	0.941051	1	5068	tags=28%, list=23%, signal=36%
DORN_ADENOVIRUS_INFECTION_48HR_DN	33	0.272019	0.925591	0.595442	0.940798	1	4274	tags=27%, list=20%, signal=34%
LEE_EARLY_T_LYMPHOCYTE_UP	79	0.223907	0.925405	0.65	0.940126	1	5428	tags=28%, list=25%, signal=37%
DARWICHE_SKIN_TUMOR_PROMOTER_UP	106	0.210248	0.92535	0.618375	0.939085	1	2709	tags=18%, list=12%, signal=20%
KIM_RESPONSE_TO_TSA_AND_DECITABINE_DN	10	0.359504	0.925201	0.555283	0.938334	1	304	tags=10%, list=1%, signal=10%
GENTILE_UV_HIGH_DOSE_UP	19	0.305645	0.925179	0.566265	0.937216	1	3317	tags=26%, list=15%, signal=31%
BOYLAN_MULTIPLE_MYELOMA_D_CLUSTER_DN	36	0.267619	0.924927	0.575758	0.93684	1	3856	tags=22%, list=18%, signal=27%
QI_HYPOXIA	116	0.209578	0.924761	0.620301	0.93615	1	5675	tags=35%, list=26%, signal=47%
CHIARETTI_ACUTE_LYMPHOBLASTIC_LEUKEMIA_ZAP70	54	0.242586	0.924757	0.619597	0.934974	1	3510	tags=24%, list=16%, signal=29%
LEE_EARLY_T_LYMPHOCYTE_DN	36	0.257933	0.921375	0.58	0.94406	1	1542	tags=17%, list=7%, signal=18%
MASRI_RESISTANCE_TO_TAMOXIFEN_AND_AROMATASE_INHIBITORS_DN	18	0.314356	0.921032	0.557647	0.943901	1	5807	tags=56%, list=27%, signal=76%
MCCLUNG_COCAIN_REWARD_4WK	68	0.227466	0.920727	0.628399	0.943642	1	5113	tags=29%, list=23%, signal=38%
TIEN_INTESTINE_PROBIOTICS_6HR_DN	134	0.19763	0.918117	0.734694	0.950353	1	3826	tags=19%, list=17%, signal=23%
LINDVALL_IMMORTALIZED_BY_TERT_UP	66	0.230977	0.917364	0.61791	0.951454	1	5156	tags=32%, list=24%, signal=41%
CHENG_RESPONSE_TO_NICKEL_ACETATE	37	0.259192	0.917174	0.632432	0.950791	1	7360	tags=51%, list=34%, signal=77%
VALK_AML_CLUSTER_13	23	0.289801	0.917081	0.581683	0.949874	1	2868	tags=30%, list=13%, signal=35%
SIMBULAN_UV_RESPONSE_IMMORTALIZED_DN	28	0.275788	0.916949	0.579221	0.949075	1	4808	tags=29%, list=22%, signal=37%
NUNODA_RESPONSE_TO_DASATINIB_IMATINIB_DN	12	0.350312	0.915753	0.548077	0.951442	1	2482	tags=25%, list=11%, signal=28%
MUELLER_METHYLATED_IN_GLIOBLASTOMA	29	0.271327	0.915247	0.590164	0.951648	1	2463	tags=24%, list=11%, signal=27%
BOYLAN_MULTIPLE_MYELOMA_C_D_UP	109	0.208956	0.915173	0.70922	0.950662	1	5552	tags=30%, list=25%, signal=40%
ZHAN_LATE_DIFFERENTIATION_GENES_DN	14	0.334536	0.915084	0.565891	0.949739	1	3910	tags=36%, list=18%, signal=43%
HU_ANGIOGENESIS_UP	19	0.300367	0.912577	0.575377	0.95599	1	5666	tags=32%, list=26%, signal=43%
ZHANG_GATA6_TARGETS_DN	56	0.239198	0.912354	0.621387	0.955482	1	4139	tags=27%, list=19%, signal=33%
KRIGE_RESPONSE_TO_TOSEDOSTAT_6HR_UP	639	0.169857	0.912285	0.915094	0.95452	1	3701	tags=18%, list=17%, signal=21%
BOYAULT_LIVER_CANCER_SUBCLASS_G1_UP	91	0.214173	0.912195	0.645902	0.953611	1	3395	tags=18%, list=16%, signal=21%
KUWANO_RNA_STABILIZED_BY_NO	7	0.411811	0.910739	0.540909	0.9566	1	3250	tags=29%, list=15%, signal=34%
TAKEDA_TARGETS_OF_NUP98_HOXA9_FUSION_3D_DN	25	0.287373	0.910029	0.594595	0.957564	1	2367	tags=28%, list=11%, signal=31%
YAO_TEMPORAL_RESPONSE_TO_PROGESTERONE_CLUSTER_7	66	0.225495	0.909952	0.652597	0.956584	1	5731	tags=30%, list=26%, signal=41%
HUMMERICH_SKIN_CANCER_PROGRESSION_UP	78	0.219775	0.909398	0.684049	0.95706	1	3701	tags=24%, list=17%, signal=29%
AMUNDSON_GENOTOXIC_SIGNATURE	90	0.217376	0.909318	0.679868	0.956117	1	4498	tags=26%, list=21%, signal=32%
PARK_APL_PATHOGENESIS_DN	39	0.248666	0.908929	0.586777	0.956101	1	1929	tags=13%, list=9%, signal=14%
NAKAMURA_METASTASIS_MODEL_DN	35	0.256273	0.908706	0.603825	0.955599	1	3238	tags=23%, list=15%, signal=27%
MA_PITUITARY_FETAL_VS_ADULT_UP	24	0.288224	0.908019	0.598425	0.956397	1	2016	tags=17%, list=9%, signal=18%
TSAI_RESPONSE_TO_IONIZING_RADIATION	126	0.202584	0.906919	0.688406	0.958301	1	5062	tags=30%, list=23%, signal=39%
KYNG_WERNER_SYNDROM_DN	19	0.30143	0.906912	0.575377	0.957152	1	6722	tags=47%, list=31%, signal=68%
NUMATA_CSF3_SIGNALING_VIA_STAT3	19	0.301298	0.906404	0.5958	0.957446	1	4906	tags=47%, list=22%, signal=61%
NIKOLSKY_BREAST_CANCER_17Q21_Q25_AMPLICON	254	0.183485	0.906136	0.812808	0.957012	1	2373	tags=13%, list=11%, signal=15%
ELVIDGE_HYPOXIA_BY_DMOG_UP	105	0.207955	0.906122	0.713333	0.955883	1	3743	tags=24%, list=17%, signal=29%
VANASSE_BCL2_TARGETS_UP	31	0.261257	0.905521	0.623737	0.956498	1	3844	tags=29%, list=18%, signal=35%
TAGHAVI_NEOPLASTIC_TRANSFORMATION	10	0.354603	0.905518	0.56974	0.955337	1	1365	tags=20%, list=6%, signal=21%
BRUINS_UVC_RESPONSE_VIA_TP53_GROUP_C	65	0.226459	0.903884	0.688272	0.958902	1	3011	tags=18%, list=14%, signal=21%
CHANDRAN_METASTASIS_UP	141	0.197222	0.903661	0.711382	0.958369	1	3759	tags=20%, list=17%, signal=24%
BENPORATH_ES_1	294	0.177703	0.903483	0.854749	0.95772	1	5138	tags=26%, list=23%, signal=34%
FIGUEROA_AML_METHYLATION_CLUSTER_1_DN	28	0.274605	0.902803	0.595855	0.9585	1	3145	tags=25%, list=14%, signal=29%
ZHAN_MULTIPLE_MYELOMA_MF_UP	39	0.249772	0.901509	0.645251	0.961022	1	1626	tags=13%, list=7%, signal=14%
WATTEL_AUTONOMOUS_THYROID_ADENOMA_UP	53	0.233266	0.90149	0.64759	0.959908	1	3222	tags=21%, list=15%, signal=24%
SHIPP_DLBCL_CURED_VS_FATAL_DN	34	0.262811	0.90073	0.623306	0.960886	1	6368	tags=50%, list=29%, signal=70%
WANG_SMARCE1_TARGETS_DN	283	0.18051	0.900261	0.825871	0.961047	1	3732	tags=20%, list=17%, signal=24%
MIKKELSEN_NPC_ICP_WITH_H3K27ME3	10	0.365102	0.900247	0.582766	0.959923	1	2037	tags=30%, list=9%, signal=33%
MARIADASON_REGULATED_BY_HISTONE_ACETYLATION_UP	61	0.229746	0.900189	0.655977	0.958929	1	3654	tags=25%, list=17%, signal=29%
LINDSTEDT_DENDRITIC_CELL_MATURATION_B	47	0.238961	0.899867	0.659763	0.958702	1	6354	tags=40%, list=29%, signal=57%
BYSTRYKH_HEMATOPOIESIS_STEM_CELL_RUNX1	9	0.366492	0.899286	0.578454	0.959194	1	4375	tags=44%, list=20%, signal=56%
SANSOM_APC_MYC_TARGETS	162	0.195805	0.89874	0.750988	0.959602	1	6212	tags=33%, list=28%, signal=46%
ZEMBUTSU_SENSITIVITY_TO_NIMUSTINE	15	0.315645	0.898154	0.59434	0.960138	1	218	tags=7%, list=1%, signal=7%
PARENT_MTOR_SIGNALING_DN	34	0.257061	0.897103	0.607558	0.961925	1	4808	tags=32%, list=22%, signal=41%
LABBE_TGFB1_TARGETS_DN	93	0.210413	0.896258	0.694704	0.963089	1	2571	tags=17%, list=12%, signal=19%
KIM_MYC_AMPLIFICATION_TARGETS_UP	150	0.191545	0.895152	0.764706	0.965007	1	5077	tags=24%, list=23%, signal=31%
DARWICHE_PAPILLOMA_RISK_LOW_UP	117	0.201018	0.894869	0.74386	0.96461	1	2709	tags=17%, list=12%, signal=19%
NEBEN_AML_WITH_FLT3_OR_NRAS_DN	11	0.344759	0.894583	0.589041	0.964247	1	3207	tags=36%, list=15%, signal=43%
CASORELLI_ACUTE_PROMYELOCYTIC_LEUKEMIA_DN	522	0.169021	0.894123	0.921875	0.96433	1	6078	tags=32%, list=28%, signal=44%
SCHWAB_TARGETS_OF_BMYB_POLYMORPHIC_VARIANTS_DN	14	0.329332	0.893819	0.591787	0.964	1	1069	tags=21%, list=5%, signal=23%
GRADE_COLON_CANCER_UP	622	0.167917	0.893752	0.893805	0.963021	1	3859	tags=17%, list=18%, signal=20%
DAZARD_UV_RESPONSE_CLUSTER_G3	14	0.315659	0.892424	0.588808	0.965598	1	5731	tags=64%, list=26%, signal=87%
COULOUARN_TEMPORAL_TGFB1_SIGNATURE_DN	114	0.200528	0.892393	0.719472	0.964552	1	4035	tags=22%, list=18%, signal=27%
DUAN_PRDM5_TARGETS	59	0.226293	0.890373	0.713068	0.968836	1	2629	tags=17%, list=12%, signal=19%
BAKER_HEMATOPOESIS_STAT5_TARGETS	7	0.402635	0.888643	0.587678	0.972384	1	4960	tags=43%, list=23%, signal=55%
BROWNE_HCMV_INFECTION_1HR_DN	175	0.189554	0.888218	0.782609	0.972335	1	5740	tags=33%, list=26%, signal=45%
ROSTY_CERVICAL_CANCER_PROLIFERATION_CLUSTER	119	0.201171	0.88821	0.727273	0.971201	1	6680	tags=33%, list=31%, signal=47%
YANG_BREAST_CANCER_ESR1_BULK_DN	20	0.292506	0.888013	0.633588	0.970609	1	4933	tags=40%, list=23%, signal=52%
YORDY_RECIPROCAL_REGULATION_BY_ETS1_AND_SP100_DN	55	0.22531	0.886062	0.69337	0.97476	1	4045	tags=29%, list=18%, signal=36%
CHANG_CYCLING_GENES	113	0.202385	0.885866	0.784314	0.974201	1	6547	tags=32%, list=30%, signal=45%
BANDRES_RESPONSE_TO_CARMUSTIN_WITHOUT_MGMT_48HR_DN	26	0.271791	0.881041	0.649867	0.985883	1	6809	tags=50%, list=31%, signal=72%
KERLEY_RESPONSE_TO_CISPLATIN_DN	5	0.426426	0.880956	0.583878	0.984956	1	3397	tags=40%, list=16%, signal=47%
GENTILE_UV_RESPONSE_CLUSTER_D1	14	0.320896	0.880498	0.642005	0.985092	1	5990	tags=50%, list=27%, signal=69%
KIM_ALL_DISORDERS_CALB1_CORR_DN	31	0.256955	0.879753	0.674797	0.985909	1	3250	tags=23%, list=15%, signal=26%
APPIERTO_RESPONSE_TO_FENRETINIDE_UP	31	0.256222	0.879726	0.676692	0.98483	1	967	tags=13%, list=4%, signal=13%
LOCKWOOD_AMPLIFIED_IN_LUNG_CANCER	171	0.189838	0.879069	0.805861	0.985416	1	3581	tags=18%, list=16%, signal=21%
SHAFFER_IRF4_TARGETS_IN_ACTIVATED_B_LYMPHOCYTE	73	0.215895	0.878548	0.727273	0.985643	1	5320	tags=32%, list=24%, signal=41%
SCHEIDEREIT_IKK_INTERACTING_PROTEINS	49	0.234121	0.87754	0.7	0.987114	1	6578	tags=39%, list=30%, signal=55%
KYNG_WERNER_SYNDROM_AND_NORMAL_AGING_UP	74	0.212274	0.877527	0.745562	0.985999	1	4474	tags=28%, list=20%, signal=36%
SWEET_KRAS_TARGETS_DN	52	0.227086	0.877444	0.681818	0.985058	1	3608	tags=25%, list=16%, signal=30%
YAGUE_PRETUMOR_DRUG_RESISTANCE_UP	6	0.413571	0.876651	0.587973	0.985864	1	1026	tags=17%, list=5%, signal=17%
LEIN_MIDBRAIN_MARKERS	66	0.215217	0.875629	0.734568	0.987421	1	5173	tags=32%, list=24%, signal=42%
POS_RESPONSE_TO_HISTAMINE_DN	7	0.390869	0.875594	0.596199	0.986357	1	3375	tags=29%, list=15%, signal=34%
LU_EZH2_TARGETS_DN	275	0.176393	0.875398	0.907216	0.985697	1	4639	tags=23%, list=21%, signal=28%
OKAWA_NEUROBLASTOMA_1P36_31_DELETION	21	0.282088	0.874101	0.658416	0.987899	1	4264	tags=33%, list=19%, signal=41%
ZHAN_MULTIPLE_MYELOMA_LB_UP	30	0.256665	0.874032	0.689655	0.986976	1	839	tags=13%, list=4%, signal=14%
CHEN_LIVER_METABOLISM_QTL_CIS	74	0.211677	0.873453	0.783784	0.987287	1	1803	tags=14%, list=8%, signal=15%
SETLUR_PROSTATE_CANCER_TMPRSS2_ERG_FUSION_UP	56	0.225938	0.873066	0.69209	0.987195	1	2529	tags=14%, list=12%, signal=16%
MYLLYKANGAS_AMPLIFICATION_HOT_SPOT_15	9	0.357894	0.872292	0.616667	0.988039	1	4950	tags=33%, list=23%, signal=43%
SHIN_B_CELL_LYMPHOMA_CLUSTER_1	11	0.337392	0.872125	0.62619	0.987335	1	499	tags=18%, list=2%, signal=19%
TAKEDA_TARGETS_OF_NUP98_HOXA9_FUSION_16D_DN	96	0.203619	0.871731	0.777778	0.987278	1	2551	tags=15%, list=12%, signal=16%
SESTO_RESPONSE_TO_UV_C3	19	0.285461	0.871629	0.629534	0.986386	1	3711	tags=26%, list=17%, signal=32%
LI_DCP2_BOUND_MRNA	69	0.213682	0.87132	0.763848	0.986038	1	4498	tags=19%, list=21%, signal=24%
VANTVEER_BREAST_CANCER_ESR1_DN	183	0.183295	0.870131	0.859849	0.987907	1	5808	tags=32%, list=27%, signal=43%
LEE_AGING_NEOCORTEX_UP	79	0.209212	0.86972	0.763333	0.987831	1	4311	tags=27%, list=20%, signal=33%
HONRADO_BREAST_CANCER_BRCA1_VS_BRCA2	15	0.312289	0.868645	0.62341	0.989329	1	1085	tags=13%, list=5%, signal=14%
RAMPON_ENRICHED_LEARNING_ENVIRONMENT_EARLY_DN	9	0.363106	0.868542	0.613954	0.988441	1	1876	tags=22%, list=9%, signal=24%
MORI_PRE_BI_LYMPHOCYTE_DN	62	0.220981	0.868344	0.72997	0.987838	1	1203	tags=10%, list=5%, signal=10%
JIANG_TIP30_TARGETS_UP	39	0.243577	0.866585	0.712166	0.991259	1	3828	tags=26%, list=17%, signal=31%
HOFFMANN_SMALL_PRE_BII_TO_IMMATURE_B_LYMPHOCYTE_DN	43	0.237835	0.866571	0.681948	0.990165	1	2564	tags=21%, list=12%, signal=24%
SHIRAISHI_PLZF_TARGETS_DN	7	0.381916	0.866433	0.629032	0.989367	1	2734	tags=43%, list=12%, signal=49%
BOSCO_ALLERGEN_INDUCED_TH2_ASSOCIATED_MODULE	119	0.197658	0.865564	0.808081	0.99036	1	4657	tags=27%, list=21%, signal=34%
THEILGAARD_NEUTROPHIL_AT_SKIN_WOUND_UP	65	0.214306	0.864404	0.750779	0.992069	1	1225	tags=9%, list=6%, signal=10%
EGUCHI_CELL_CYCLE_RB1_TARGETS	20	0.278718	0.86412	0.666667	0.991617	1	6547	tags=35%, list=30%, signal=50%
CHIBA_RESPONSE_TO_TSA_DN	19	0.280797	0.863925	0.664103	0.990977	1	4735	tags=26%, list=22%, signal=34%
SANA_RESPONSE_TO_IFNG_DN	73	0.206126	0.862893	0.73125	0.992362	1	5115	tags=27%, list=23%, signal=36%
MORI_PLASMA_CELL_DN	28	0.261067	0.8621	0.653747	0.993164	1	3494	tags=21%, list=16%, signal=25%
BRUINS_UVC_RESPONSE_MIDDLE	72	0.213197	0.861896	0.764012	0.992519	1	5366	tags=35%, list=25%, signal=46%
KYNG_DNA_DAMAGE_BY_4NQO	32	0.255994	0.861609	0.673317	0.992119	1	2634	tags=25%, list=12%, signal=28%
GOTZMANN_EPITHELIAL_TO_MESENCHYMAL_TRANSITION_DN	191	0.18175	0.86148	0.861344	0.991336	1	3677	tags=18%, list=17%, signal=21%
KORKOLA_EMBRYONAL_CARCINOMA	7	0.384644	0.860223	0.626829	0.993232	1	4357	tags=57%, list=20%, signal=71%
GENTILE_UV_LOW_DOSE_DN	53	0.222741	0.860002	0.732733	0.992618	1	5376	tags=36%, list=25%, signal=47%
RATTENBACHER_BOUND_BY_CELF1	291	0.171531	0.859676	0.923077	0.992319	1	4462	tags=22%, list=20%, signal=27%
CORRADETTI_MTOR_PATHWAY_REGULATORS_DN	5	0.41856	0.859642	0.623025	0.991269	1	6427	tags=60%, list=29%, signal=85%
RAY_TUMORIGENESIS_BY_ERBB2_CDC25A_UP	88	0.201653	0.859367	0.787037	0.990796	1	4960	tags=27%, list=23%, signal=35%
CREIGHTON_AKT1_SIGNALING_VIA_MTOR_UP	32	0.251617	0.85666	0.688705	0.9962	1	5687	tags=28%, list=26%, signal=38%
SHI_SPARC_TARGETS_UP	19	0.281689	0.856305	0.675676	0.995941	1	4603	tags=37%, list=21%, signal=47%
PEDERSEN_METASTASIS_BY_ERBB2_ISOFORM_5	9	0.351737	0.855961	0.614679	0.995609	1	4274	tags=33%, list=20%, signal=41%
GHANDHI_BYSTANDER_IRRADIATION_UP	61	0.215971	0.855619	0.743284	0.995288	1	1669	tags=15%, list=8%, signal=16%
LANDIS_ERBB2_BREAST_TUMORS_324_UP	121	0.193666	0.85364	0.839286	0.99888	1	6737	tags=36%, list=31%, signal=51%
LY_AGING_OLD_UP	7	0.37143	0.853315	0.637188	0.998491	1	3702	tags=43%, list=17%, signal=52%
SMIRNOV_RESPONSE_TO_IR_2HR_DN	43	0.229352	0.851281	0.728	1	1	3697	tags=26%, list=17%, signal=31%
GOTZMANN_EPITHELIAL_TO_MESENCHYMAL_TRANSITION_UP	65	0.21193	0.851113	0.775281	1	1	3554	tags=25%, list=16%, signal=29%
WU_HBX_TARGETS_2_DN	13	0.324499	0.851086	0.631206	1	1	4079	tags=38%, list=19%, signal=47%
TIAN_BHLHA15_TARGETS	14	0.312726	0.850819	0.690418	0.999775	1	97	tags=7%, list=0%, signal=7%
KORKOLA_EMBRYONIC_CARCINOMA_VS_SEMINOMA_UP	19	0.283936	0.850815	0.699229	0.998684	1	1286	tags=16%, list=6%, signal=17%
LINDSTEDT_DENDRITIC_CELL_MATURATION_C	59	0.217563	0.850376	0.769911	0.998602	1	2720	tags=19%, list=12%, signal=21%
VISALA_AGING_LYMPHOCYTE_DN	14	0.312147	0.849506	0.675258	0.999416	1	7524	tags=57%, list=34%, signal=87%
MULLIGHAN_NPM1_MUTATED_SIGNATURE_1_UP	208	0.178459	0.849487	0.921811	0.998368	1	3402	tags=17%, list=16%, signal=20%
YAMASHITA_LIVER_CANCER_STEM_CELL_UP	43	0.229267	0.846899	0.738162	1	1	3005	tags=21%, list=14%, signal=24%
KYNG_RESPONSE_TO_H2O2_VIA_ERCC6	15	0.30358	0.846361	0.65285	1	1	4470	tags=33%, list=20%, signal=42%
MIKKELSEN_MCV6_ICP_WITH_H3K4ME3_AND_H3K27ME3	24	0.259684	0.846351	0.707921	1	1	2091	tags=21%, list=10%, signal=23%
WEST_ADRENOCORTICAL_TUMOR_UP	245	0.171135	0.845154	0.951219	1	1	5059	tags=24%, list=23%, signal=31%
FRIDMAN_IMMORTALIZATION_DN	30	0.250478	0.844981	0.710256	1	1	3776	tags=30%, list=17%, signal=36%
ZWANG_EGF_INTERVAL_UP	47	0.225234	0.844404	0.77809	1	1	4657	tags=28%, list=21%, signal=35%
SMID_BREAST_CANCER_RELAPSE_IN_LIVER_UP	6	0.385579	0.843948	0.633663	1	1	352	tags=17%, list=2%, signal=17%
MAGRANGEAS_MULTIPLE_MYELOMA_IGG_VS_IGA_UP	18	0.279452	0.843473	0.66005	1	1	3005	tags=17%, list=14%, signal=19%
IIZUKA_LIVER_CANCER_PROGRESSION_L1_G1_DN	11	0.327623	0.842967	0.693512	1	1	4651	tags=27%, list=21%, signal=35%
TONKS_TARGETS_OF_RUNX1_RUNX1T1_FUSION_SUSTAINED_IN_GRANULOCYTE_UP	13	0.312108	0.841955	0.678816	1	1	2019	tags=23%, list=9%, signal=25%
NIKOLSKY_BREAST_CANCER_19Q13.4_AMPLICON	6	0.394854	0.841765	0.656398	1	1	1863	tags=33%, list=9%, signal=36%
FUJIWARA_PARK2_HEPATOCYTE_PROLIFERATION_DN	6	0.398181	0.841652	0.662736	1	1	1158	tags=17%, list=5%, signal=18%
HIRSCH_CELLULAR_TRANSFORMATION_SIGNATURE_DN	82	0.200725	0.841552	0.782895	1	1	3221	tags=15%, list=15%, signal=17%
XU_HGF_TARGETS_REPRESSED_BY_AKT1_UP	9	0.348693	0.839695	0.656682	1	1	1460	tags=11%, list=7%, signal=12%
MATZUK_LUTEAL_GENES	8	0.367256	0.839673	0.669643	1	1	326	tags=13%, list=1%, signal=13%
GALI_TP53_TARGETS_APOPTOTIC_DN	5	0.425952	0.837401	0.648148	1	1	5017	tags=60%, list=23%, signal=78%
WEIGEL_OXIDATIVE_STRESS_RESPONSE	29	0.243915	0.836762	0.726316	1	1	1876	tags=14%, list=9%, signal=15%
WANG_METASTASIS_OF_BREAST_CANCER_ESR1_UP	19	0.279375	0.836743	0.712121	1	1	6954	tags=47%, list=32%, signal=69%
HOLLEMAN_VINCRISTINE_RESISTANCE_ALL_UP	19	0.274718	0.836437	0.708122	1	1	1484	tags=21%, list=7%, signal=23%
GRAHAM_CML_QUIESCENT_VS_NORMAL_DIVIDING_DN	8	0.356053	0.836316	0.649412	1	1	3221	tags=38%, list=15%, signal=44%
BOHN_PRIMARY_IMMUNODEFICIENCY_SYNDROM_UP	36	0.240245	0.835723	0.759563	1	1	1483	tags=11%, list=7%, signal=12%
BROCKE_APOPTOSIS_REVERSED_BY_IL6	113	0.189659	0.834091	0.82807	1	1	3884	tags=22%, list=18%, signal=27%
SHEPARD_BMYB_MORPHOLINO_DN	165	0.178867	0.833886	0.877637	1	1	4560	tags=24%, list=21%, signal=30%
BALLIF_DEVELOPMENTAL_DISABILITY_P16_P12_DELETION	12	0.327759	0.83354	0.711165	1	1	6415	tags=58%, list=29%, signal=82%
JEON_SMAD6_TARGETS_UP	19	0.280743	0.833456	0.71504	1	1	4735	tags=32%, list=22%, signal=40%
LINDGREN_BLADDER_CANCER_CLUSTER_3_UP	250	0.169198	0.832486	0.935185	1	1	6442	tags=36%, list=29%, signal=50%
FUNG_IL2_TARGETS_WITH_STAT5_BINDING_SITES_T1	8	0.354619	0.832477	0.659955	1	1	4003	tags=50%, list=18%, signal=61%
CHEN_ETV5_TARGETS_TESTIS	19	0.279298	0.831737	0.712821	1	1	4839	tags=37%, list=22%, signal=47%
BURTON_ADIPOGENESIS_3	87	0.196123	0.831349	0.840841	1	1	6547	tags=41%, list=30%, signal=59%
LOPEZ_MESOTHELIOMA_SURVIVAL_OVERALL_DN	14	0.297624	0.831297	0.737113	1	1	3110	tags=21%, list=14%, signal=25%
MURAKAMI_UV_RESPONSE_1HR_UP	10	0.333936	0.830188	0.697733	1	1	7413	tags=50%, list=34%, signal=76%
DELPUECH_FOXO3_TARGETS_UP	59	0.209589	0.829951	0.834375	1	1	3910	tags=25%, list=18%, signal=31%
NUNODA_RESPONSE_TO_DASATINIB_IMATINIB_UP	28	0.250103	0.828263	0.754569	1	1	4960	tags=29%, list=23%, signal=37%
CHEMNITZ_RESPONSE_TO_PROSTAGLANDIN_E2_UP	106	0.188507	0.828044	0.861842	1	1	4732	tags=23%, list=22%, signal=29%
ZHAN_V1_LATE_DIFFERENTIATION_GENES_DN	12	0.310229	0.827995	0.64133	1	1	4546	tags=42%, list=21%, signal=53%
KOKKINAKIS_METHIONINE_DEPRIVATION_48HR_UP	119	0.189395	0.827725	0.875	1	1	5707	tags=35%, list=26%, signal=47%
SHI_SPARC_TARGETS_DN	11	0.323893	0.825713	0.668293	1	1	2968	tags=36%, list=14%, signal=42%
AMIT_EGF_RESPONSE_120_HELA	59	0.209783	0.825465	0.828313	1	1	3667	tags=24%, list=17%, signal=28%
ZHANG_RESPONSE_TO_CANTHARIDIN_DN	57	0.213069	0.825423	0.83844	1	1	3401	tags=19%, list=16%, signal=23%
HINATA_NFKB_TARGETS_KERATINOCYTE_UP	79	0.199016	0.824337	0.830721	1	1	2267	tags=15%, list=10%, signal=17%
SHIN_B_CELL_LYMPHOMA_CLUSTER_2	28	0.245496	0.824023	0.746114	1	1	5928	tags=43%, list=27%, signal=59%
NOUSHMEHR_GBM_SOMATIC_MUTATED	8	0.353947	0.822024	0.675991	1	1	2397	tags=25%, list=11%, signal=28%
LEE_CALORIE_RESTRICTION_NEOCORTEX_UP	71	0.203944	0.821962	0.84345	1	1	3433	tags=20%, list=16%, signal=23%
FOSTER_TOLERANT_MACROPHAGE_DN	340	0.1611	0.821774	0.977528	1	1	4678	tags=23%, list=21%, signal=29%
TIEN_INTESTINE_PROBIOTICS_2HR_DN	70	0.201048	0.821641	0.83526	1	1	1920	tags=11%, list=9%, signal=12%
FEVR_CTNNB1_TARGETS_DN	416	0.156838	0.82011	0.986301	1	1	6753	tags=35%, list=31%, signal=50%
HALMOS_CEBPA_TARGETS_UP	47	0.221341	0.819834	0.79096	1	1	3425	tags=23%, list=16%, signal=28%
MARIADASON_RESPONSE_TO_BUTYRATE_SULINDAC_4	15	0.283374	0.818811	0.735084	1	1	5257	tags=40%, list=24%, signal=53%
HALMOS_CEBPA_TARGETS_DN	39	0.224607	0.818287	0.788204	1	1	3608	tags=23%, list=16%, signal=28%
SYED_ESTRADIOL_RESPONSE	16	0.283612	0.817831	0.734554	1	1	2412	tags=13%, list=11%, signal=14%
BERTUCCI_INVASIVE_CARCINOMA_DUCTAL_VS_LOBULAR_UP	20	0.269631	0.81725	0.75063	1	1	4605	tags=35%, list=21%, signal=44%
WEIGEL_OXIDATIVE_STRESS_BY_TBH_AND_H2O2	30	0.243399	0.817144	0.745989	1	1	1578	tags=10%, list=7%, signal=11%
YU_MYC_TARGETS_UP	32	0.23537	0.816474	0.786486	1	1	5953	tags=28%, list=27%, signal=39%
AMIT_EGF_RESPONSE_40_HELA	37	0.231667	0.816421	0.776074	1	1	4400	tags=27%, list=20%, signal=34%
SAKAI_TUMOR_INFILTRATING_MONOCYTES_DN	68	0.201042	0.814843	0.842105	1	1	1311	tags=7%, list=6%, signal=8%
BAKER_HEMATOPOESIS_STAT1_TARGETS	10	0.325408	0.81383	0.673861	1	1	4511	tags=40%, list=21%, signal=50%
SENESE_HDAC3_TARGETS_DN	379	0.157403	0.813534	0.957831	1	1	4812	tags=23%, list=22%, signal=29%
JOSEPH_RESPONSE_TO_SODIUM_BUTYRATE_UP	28	0.244521	0.813504	0.7625	1	1	2190	tags=11%, list=10%, signal=12%
KANNAN_TP53_TARGETS_DN	20	0.263876	0.812764	0.772727	1	1	4461	tags=30%, list=20%, signal=38%
ZHANG_RESPONSE_TO_CANTHARIDIN_UP	17	0.280674	0.81268	0.748705	1	1	2881	tags=24%, list=13%, signal=27%
OUELLET_CULTURED_OVARIAN_CANCER_INVASIVE_VS_LMP_UP	54	0.212198	0.810893	0.832386	1	1	5064	tags=26%, list=23%, signal=34%
BANDRES_RESPONSE_TO_CARMUSTIN_WITHOUT_MGMT_24HR_UP	13	0.294725	0.810811	0.719048	1	1	15442	tags=100%, list=71%, signal=339%
BENPORATH_ES_CORE_NINE_CORRELATED	91	0.192513	0.810767	0.88961	1	1	5566	tags=31%, list=25%, signal=41%
WHITFIELD_CELL_CYCLE_G1_S	97	0.187505	0.8107	0.896296	1	1	6013	tags=37%, list=27%, signal=51%
VALK_AML_CLUSTER_15	25	0.25221	0.810508	0.747968	1	1	5225	tags=28%, list=24%, signal=37%
FUNG_IL2_SIGNALING_2	10	0.324009	0.810138	0.702899	1	1	4003	tags=40%, list=18%, signal=49%
GROSS_HYPOXIA_VIA_ELK3_ONLY_UP	30	0.243427	0.809435	0.789203	1	1	2231	tags=17%, list=10%, signal=19%
WHITFIELD_CELL_CYCLE_S	107	0.184045	0.809423	0.90106	1	1	6680	tags=36%, list=31%, signal=52%
MUNSHI_MULTIPLE_MYELOMA_UP	71	0.202247	0.808695	0.849693	1	1	3479	tags=17%, list=16%, signal=20%
MILI_PSEUDOPODIA_HAPTOTAXIS_DN	522	0.150873	0.807417	1	1	1	4495	tags=21%, list=21%, signal=26%
GRAHAM_CML_QUIESCENT_VS_CML_DIVIDING_UP	18	0.27171	0.806564	0.746154	1	1	2551	tags=28%, list=12%, signal=31%
FREDERICK_PRKCI_TARGETS	8	0.349585	0.806275	0.704434	1	1	306	tags=13%, list=1%, signal=13%
MATTHEWS_AP1_TARGETS	17	0.279856	0.80592	0.740385	1	1	4137	tags=35%, list=19%, signal=43%
HIRSCH_CELLULAR_TRANSFORMATION_SIGNATURE_UP	199	0.169441	0.805339	0.969027	1	1	3942	tags=21%, list=18%, signal=26%
BHAT_ESR1_TARGETS_VIA_AKT1_DN	65	0.200492	0.804466	0.891117	1	1	3358	tags=22%, list=15%, signal=25%
LI_LUNG_CANCER	34	0.232001	0.803557	0.823529	1	1	1299	tags=9%, list=6%, signal=9%
SEITZ_NEOPLASTIC_TRANSFORMATION_BY_8P_DELETION_DN	25	0.244854	0.803489	0.8	1	1	3090	tags=24%, list=14%, signal=28%
ROZANOV_MMP14_TARGETS_DN	23	0.256861	0.803033	0.756684	1	1	2527	tags=26%, list=12%, signal=29%
DAZARD_UV_RESPONSE_CLUSTER_G24	20	0.259566	0.800537	0.765743	1	1	5654	tags=45%, list=26%, signal=61%
YAO_TEMPORAL_RESPONSE_TO_PROGESTERONE_CLUSTER_3	14	0.294113	0.800058	0.748731	1	1	1763	tags=21%, list=8%, signal=23%
SUNG_METASTASIS_STROMA_UP	88	0.19061	0.798744	0.880795	1	1	3746	tags=23%, list=17%, signal=27%
PENG_GLUCOSE_DEPRIVATION_DN	134	0.176872	0.79781	0.933798	1	1	4669	tags=24%, list=21%, signal=30%
FALVELLA_SMOKERS_WITH_LUNG_CANCER	64	0.19829	0.79737	0.897661	1	1	3531	tags=19%, list=16%, signal=22%
VALK_AML_CLUSTER_16	19	0.266041	0.795556	0.767313	1	1	3146	tags=26%, list=14%, signal=31%
PETRETTO_BLOOD_PRESSURE_DN	5	0.397423	0.795452	0.712644	1	1	13192	tags=100%, list=60%, signal=252%
ODONNELL_TFRC_TARGETS_DN	100	0.183709	0.795234	0.916667	1	1	5072	tags=24%, list=23%, signal=31%
KOKKINAKIS_METHIONINE_DEPRIVATION_96HR_DN	69	0.197881	0.795112	0.884012	1	1	3544	tags=19%, list=16%, signal=22%
LOPEZ_TRANSLATION_VIA_FN1_SIGNALING	31	0.226823	0.795076	0.802057	1	1	4335	tags=23%, list=20%, signal=28%
MOOTHA_MITOCHONDRIA	396	0.154693	0.794209	1	1	1	2807	tags=11%, list=13%, signal=12%
LUI_THYROID_CANCER_CLUSTER_1	42	0.219801	0.793636	0.803922	1	1	4946	tags=31%, list=23%, signal=40%
BYSTRYKH_HEMATOPOIESIS_STEM_CELL_FLI1	8	0.338939	0.792986	0.715663	1	1	3048	tags=25%, list=14%, signal=29%
NUYTTEN_EZH2_TARGETS_DN	704	0.146572	0.792824	1	1	1	5478	tags=26%, list=25%, signal=33%
PYEON_HPV_POSITIVE_TUMORS_DN	8	0.338399	0.792224	0.734375	1	1	2205	tags=25%, list=10%, signal=28%
WHITE_NEUROBLASTOMA_WITH_1P36.3_DELETION	19	0.261318	0.791815	0.786082	1	1	4264	tags=32%, list=19%, signal=39%
KORKOLA_CORRELATED_WITH_POU5F1	20	0.260963	0.789826	0.778626	1	1	4357	tags=35%, list=20%, signal=44%
KOKKINAKIS_METHIONINE_DEPRIVATION_48HR_DN	61	0.199709	0.789666	0.843658	1	1	2190	tags=15%, list=10%, signal=16%
SCIAN_INVERSED_TARGETS_OF_TP53_AND_TP73_UP	8	0.342946	0.789139	0.711268	1	1	3135	tags=38%, list=14%, signal=44%
LOPES_METHYLATED_IN_COLON_CANCER_UP	22	0.25381	0.786956	0.79798	1	1	3759	tags=27%, list=17%, signal=33%
UDAYAKUMAR_MED1_TARGETS_UP	110	0.179206	0.786028	0.953642	1	1	5843	tags=30%, list=27%, signal=41%
MIKKELSEN_MCV6_LCP_WITH_H3K27ME3	19	0.258291	0.78576	0.779703	1	1	3881	tags=26%, list=18%, signal=32%
TSUTSUMI_FBXW8_TARGETS	8	0.343993	0.785685	0.710345	1	1	2106	tags=25%, list=10%, signal=28%
ZHOU_CELL_CYCLE_GENES_IN_IR_RESPONSE_24HR	99	0.181791	0.785539	0.958064	1	1	5899	tags=30%, list=27%, signal=41%
YAMASHITA_LIVER_CANCER_WITH_EPCAM_UP	39	0.215943	0.78539	0.860399	1	1	5642	tags=26%, list=26%, signal=34%
SARTIPY_BLUNTED_BY_INSULIN_RESISTANCE_UP	17	0.269264	0.785208	0.738272	1	1	3537	tags=35%, list=16%, signal=42%
DANG_BOUND_BY_MYC	889	0.144402	0.783634	1	1	1	5428	tags=25%, list=25%, signal=31%
AZARE_NEOPLASTIC_TRANSFORMATION_BY_STAT3_UP	15	0.273811	0.78284	0.779018	1	1	4625	tags=40%, list=21%, signal=51%
PUJANA_XPRSS_INT_NETWORK	137	0.171907	0.781773	0.948097	1	1	7244	tags=39%, list=33%, signal=59%
DACOSTA_UV_RESPONSE_VIA_ERCC3_COMMON_DN	387	0.152784	0.781475	1	1	1	5644	tags=25%, list=26%, signal=33%
YUAN_ZNF143_PARTNERS	16	0.278647	0.781192	0.773869	1	1	5920	tags=38%, list=27%, signal=51%
CHIANG_LIVER_CANCER_SUBCLASS_UNANNOTATED_UP	59	0.196555	0.779955	0.877907	1	1	4680	tags=31%, list=21%, signal=39%
NAKAMURA_METASTASIS	35	0.223123	0.779674	0.795455	1	1	3505	tags=26%, list=16%, signal=31%
LOPEZ_MESOTELIOMA_SURVIVAL_TIME_DN	7	0.347855	0.779205	0.752232	1	1	691	tags=14%, list=3%, signal=15%
TCGA_GLIOBLASTOMA_MUTATED	8	0.335855	0.779004	0.725055	1	1	3615	tags=25%, list=17%, signal=30%
XU_HGF_TARGETS_INDUCED_BY_AKT1_48HR_DN	18	0.257004	0.77872	0.778626	1	1	1111	tags=11%, list=5%, signal=12%
ZHOU_TNF_SIGNALING_4HR	45	0.210965	0.777308	0.872521	1	1	4470	tags=24%, list=20%, signal=31%
SESTO_RESPONSE_TO_UV_C2	42	0.215938	0.777287	0.844504	1	1	5520	tags=29%, list=25%, signal=38%
KIM_WT1_TARGETS_DN	353	0.152678	0.777267	1	1	1	3451	tags=14%, list=16%, signal=17%
ISHIDA_E2F_TARGETS	45	0.212491	0.777186	0.838235	1	1	7779	tags=42%, list=36%, signal=65%
NIKOLSKY_BREAST_CANCER_7P15_AMPLICON	10	0.310615	0.776961	0.76087	1	1	2159	tags=20%, list=10%, signal=22%
SMID_BREAST_CANCER_RELAPSE_IN_BRAIN_UP	35	0.217718	0.775187	0.853994	1	1	2111	tags=14%, list=10%, signal=16%
ZHOU_TNF_SIGNALING_30MIN	44	0.208583	0.774162	0.867568	1	1	3628	tags=18%, list=17%, signal=22%
ZHENG_FOXP3_TARGETS_IN_THYMUS_DN	11	0.305819	0.773768	0.796296	1	1	2290	tags=27%, list=10%, signal=30%
NIKOLSKY_BREAST_CANCER_1Q21_AMPLICON	33	0.226627	0.772607	0.830601	1	1	3465	tags=21%, list=16%, signal=25%
VETTER_TARGETS_OF_PRKCA_AND_ETS1_UP	13	0.280515	0.772286	0.771499	1	1	6589	tags=62%, list=30%, signal=88%
DEN_INTERACT_WITH_LCA5	23	0.246105	0.771018	0.794189	1	1	5852	tags=35%, list=27%, signal=47%
NEWMAN_ERCC6_TARGETS_UP	19	0.255976	0.769051	0.798544	1	1	3232	tags=26%, list=15%, signal=31%
ASGHARZADEH_NEUROBLASTOMA_POOR_SURVIVAL_DN	35	0.221832	0.768868	0.870732	1	1	3790	tags=26%, list=17%, signal=31%
WORSCHECH_TUMOR_EVASION_AND_TOLEROGENICITY_DN	14	0.279364	0.767891	0.760101	1	1	3078	tags=29%, list=14%, signal=33%
XU_CREBBP_TARGETS_UP	21	0.253082	0.767494	0.816489	1	1	7081	tags=52%, list=32%, signal=77%
STANELLE_E2F1_TARGETS	23	0.244586	0.767435	0.825871	1	1	2791	tags=22%, list=13%, signal=25%
ASTON_MAJOR_DEPRESSIVE_DISORDER_DN	138	0.171451	0.765935	0.974359	1	1	6217	tags=36%, list=28%, signal=49%
IVANOVSKA_MIR106B_TARGETS	67	0.190709	0.765626	0.91369	1	1	2373	tags=13%, list=11%, signal=15%
JACKSON_DNMT1_TARGETS_UP	72	0.18718	0.765379	0.928125	1	1	3916	tags=21%, list=18%, signal=25%
BREDEMEYER_RAG_SIGNALING_VIA_ATM_NOT_VIA_NFKB_DN	30	0.221723	0.764678	0.878378	1	1	827	tags=10%, list=4%, signal=10%
GALE_APL_WITH_FLT3_MUTATED_UP	35	0.221671	0.763236	0.857143	1	1	2634	tags=14%, list=12%, signal=16%
DASU_IL6_SIGNALING_DN	6	0.353196	0.762462	0.727477	1	1	3433	tags=33%, list=16%, signal=40%
BENPORATH_MYC_MAX_TARGETS	627	0.142181	0.762136	1	1	1	5428	tags=23%, list=25%, signal=29%
PARK_HSC_VS_MULTIPOTENT_PROGENITORS_DN	15	0.271364	0.759702	0.804177	1	1	5218	tags=40%, list=24%, signal=52%
BENPORATH_NANOG_TARGETS	754	0.14003	0.759162	1	1	1	5115	tags=23%, list=23%, signal=29%
GENTILE_UV_RESPONSE_CLUSTER_D4	44	0.203806	0.758397	0.919668	1	1	5654	tags=36%, list=26%, signal=49%
GARCIA_TARGETS_OF_FLI1_AND_DAX1_DN	126	0.168285	0.758157	0.96	1	1	7057	tags=34%, list=32%, signal=50%
SCHLOSSER_SERUM_RESPONSE_AUGMENTED_BY_MYC	89	0.180972	0.757826	0.941558	1	1	1561	tags=9%, list=7%, signal=10%
GALLUZZI_PERMEABILIZE_MITOCHONDRIA	39	0.209837	0.757714	0.880597	1	1	5153	tags=31%, list=24%, signal=40%
BURTON_ADIPOGENESIS_PEAK_AT_24HR	34	0.224435	0.757407	0.851003	1	1	3875	tags=18%, list=18%, signal=21%
HENDRICKS_SMARCA4_TARGETS_UP	41	0.203426	0.756984	0.874286	1	1	2967	tags=15%, list=14%, signal=17%
HOLLEMAN_DAUNORUBICIN_B_ALL_DN	10	0.299529	0.75621	0.775176	1	1	15336	tags=100%, list=70%, signal=334%
HASINA_NOL7_TARGETS_UP	11	0.294671	0.756208	0.791563	1	1	5365	tags=45%, list=25%, signal=60%
DARWICHE_PAPILLOMA_RISK_HIGH_VS_LOW_UP	5	0.37012	0.755958	0.762864	1	1	1397	tags=20%, list=6%, signal=21%
MATZUK_EMBRYONIC_GERM_CELL	18	0.257191	0.755389	0.816327	1	1	4511	tags=39%, list=21%, signal=49%
PAL_PRMT5_TARGETS_DN	26	0.232703	0.754898	0.821333	1	1	3796	tags=23%, list=17%, signal=28%
BROWNE_HCMV_INFECTION_2HR_DN	44	0.203583	0.754719	0.867232	1	1	3469	tags=25%, list=16%, signal=30%
DAZARD_UV_RESPONSE_CLUSTER_G4	15	0.271175	0.754434	0.824561	1	1	4304	tags=33%, list=20%, signal=41%
SCHLESINGER_METHYLATED_IN_COLON_CANCER	10	0.304157	0.754284	0.800459	1	1	4130	tags=50%, list=19%, signal=62%
YIH_RESPONSE_TO_ARSENITE_C4	16	0.260599	0.753996	0.819338	1	1	1500	tags=13%, list=7%, signal=13%
JI_RESPONSE_TO_FSH_DN	51	0.200483	0.753081	0.890141	1	1	1749	tags=10%, list=8%, signal=11%
GRAHAM_CML_DIVIDING_VS_NORMAL_DIVIDING_DN	7	0.334593	0.752729	0.767281	1	1	2019	tags=29%, list=9%, signal=31%
KONDO_HYPOXIA	6	0.348882	0.751116	0.762238	1	1	6348	tags=67%, list=29%, signal=94%
XU_RESPONSE_TO_TRETINOIN_DN	10	0.301066	0.751041	0.78271	1	1	3494	tags=20%, list=16%, signal=24%
MATZUK_SPERMATID_DIFFERENTIATION	32	0.211792	0.750235	0.853904	1	1	2737	tags=19%, list=13%, signal=21%
TIAN_TNF_SIGNALING_NOT_VIA_NFKB	20	0.243936	0.749362	0.843284	1	1	4274	tags=30%, list=20%, signal=37%
KAUFFMANN_DNA_REPLICATION_GENES	120	0.169843	0.748939	0.966418	1	1	6612	tags=36%, list=30%, signal=51%
AMIT_SERUM_RESPONSE_60_MCF10A	49	0.19602	0.746991	0.92033	1	1	3717	tags=24%, list=17%, signal=29%
IVANOV_MUTATED_IN_COLON_CANCER	9	0.309957	0.746104	0.761336	1	1	5637	tags=33%, list=26%, signal=45%
SENESE_HDAC1_TARGETS_UP	348	0.14732	0.746089	1	1	1	4727	tags=21%, list=22%, signal=26%
SCHRAETS_MLL_TARGETS_UP	32	0.215798	0.74601	0.902439	1	1	2935	tags=19%, list=13%, signal=22%
CROSBY_E2F4_TARGETS	5	0.378552	0.745626	0.760181	1	1	13605	tags=100%, list=62%, signal=264%
NIKOLSKY_BREAST_CANCER_5P15_AMPLICON	17	0.252974	0.744536	0.831579	1	1	68	tags=6%, list=0%, signal=6%
BURTON_ADIPOGENESIS_5	99	0.172286	0.744473	0.980519	1	1	3628	tags=17%, list=17%, signal=20%
CROONQUIST_IL6_DEPRIVATION_UP	15	0.267147	0.744101	0.805556	1	1	2097	tags=13%, list=10%, signal=15%
BAE_BRCA1_TARGETS_UP	69	0.186609	0.743118	0.932927	1	1	1871	tags=9%, list=9%, signal=9%
ZHAN_MULTIPLE_MYELOMA_CD1_DN	32	0.218603	0.74277	0.839237	1	1	2042	tags=13%, list=9%, signal=14%
NIKOLSKY_BREAST_CANCER_17P11_AMPLICON	6	0.349606	0.741396	0.781176	1	1	2397	tags=17%, list=11%, signal=19%
SCHOEN_NFKB_SIGNALING	30	0.216467	0.740884	0.895442	1	1	3949	tags=27%, list=18%, signal=32%
WAMUNYOKOLI_OVARIAN_CANCER_GRADES_1_2_UP	112	0.168982	0.740386	0.989286	1	1	2720	tags=12%, list=12%, signal=13%
BYSTRYKH_HEMATOPOIESIS_STEM_CELL_SCP2_QTL_TRANS	22	0.239624	0.740101	0.85101	1	1	3402	tags=23%, list=16%, signal=27%
YAMAZAKI_TCEB3_TARGETS_DN	172	0.157087	0.739648	0.996198	1	1	3720	tags=17%, list=17%, signal=20%
TIEN_INTESTINE_PROBIOTICS_24HR_UP	450	0.141588	0.738306	1	1	1	6702	tags=32%, list=31%, signal=46%
KIM_ALL_DISORDERS_DURATION_CORR_DN	122	0.166314	0.737539	0.989011	1	1	6191	tags=30%, list=28%, signal=42%
BYSTRYKH_HEMATOPOIESIS_STEM_CELL_AND_BRAIN_QTL_TRANS	151	0.161802	0.735205	0.991489	1	1	5306	tags=28%, list=24%, signal=36%
FOURNIER_ACINAR_DEVELOPMENT_LATE_UP	8	0.316966	0.734585	0.785548	1	1	3702	tags=25%, list=17%, signal=30%
FERREIRA_EWINGS_SARCOMA_UNSTABLE_VS_STABLE_UP	122	0.167154	0.733672	0.980392	1	1	5708	tags=30%, list=26%, signal=40%
RIZ_ERYTHROID_DIFFERENTIATION_HBZ	35	0.207392	0.73347	0.896739	1	1	2483	tags=14%, list=11%, signal=16%
APPIERTO_RESPONSE_TO_FENRETINIDE_DN	34	0.208237	0.732607	0.908078	1	1	1757	tags=12%, list=8%, signal=13%
BROWNE_HCMV_INFECTION_20HR_DN	85	0.174581	0.731421	0.973856	1	1	4601	tags=21%, list=21%, signal=27%
CHEN_LUNG_CANCER_SURVIVAL	20	0.242383	0.73076	0.843188	1	1	7464	tags=45%, list=34%, signal=68%
CHANDRAN_METASTASIS_TOP50_DN	43	0.200461	0.730534	0.921196	1	1	4648	tags=26%, list=21%, signal=32%
BUSA_SAM68_TARGETS_UP	7	0.327944	0.729472	0.817204	1	1	4859	tags=43%, list=22%, signal=55%
GEORGES_TARGETS_OF_MIR192_AND_MIR215	637	0.136784	0.729353	1	1	1	5655	tags=26%, list=26%, signal=34%
BUCKANOVICH_T_LYMPHOCYTE_HOMING_ON_TUMOR_UP	15	0.267544	0.728928	0.828087	1	1	5306	tags=47%, list=24%, signal=62%
COLLIS_PRKDC_SUBSTRATES	18	0.247613	0.728344	0.846348	1	1	1744	tags=11%, list=8%, signal=12%
RIZ_ERYTHROID_DIFFERENTIATION_APOBEC2	21	0.232381	0.726652	0.875	1	1	2260	tags=19%, list=10%, signal=21%
KIM_ALL_DISORDERS_CALB1_CORR_UP	463	0.138717	0.726571	1	1	1	2571	tags=10%, list=12%, signal=11%
BANDRES_RESPONSE_TO_CARMUSTIN_MGMT_24HR_UP	8	0.309816	0.726507	0.806202	1	1	7125	tags=38%, list=33%, signal=56%
AKL_HTLV1_INFECTION_UP	24	0.227215	0.726165	0.866492	1	1	7588	tags=46%, list=35%, signal=70%
GALINDO_IMMUNE_RESPONSE_TO_ENTEROTOXIN	75	0.175919	0.725447	0.965839	1	1	3496	tags=20%, list=16%, signal=24%
WAMUNYOKOLI_OVARIAN_CANCER_LMP_UP	197	0.150998	0.72434	0.996032	1	1	4090	tags=18%, list=19%, signal=22%
CHICAS_RB1_TARGETS_LOW_SERUM	61	0.181149	0.723958	0.948328	1	1	1228	tags=7%, list=6%, signal=7%
BRACHAT_RESPONSE_TO_METHOTREXATE_DN	20	0.242982	0.722868	0.84901	1	1	6415	tags=45%, list=29%, signal=64%
MIKKELSEN_DEDIFFERENTIATED_STATE_UP	8	0.305339	0.72273	0.788991	1	1	3713	tags=25%, list=17%, signal=30%
LEI_HOXC8_TARGETS_DN	15	0.257804	0.72249	0.844706	1	1	4044	tags=27%, list=18%, signal=33%
MORI_IMMATURE_B_LYMPHOCYTE_DN	78	0.171824	0.72209	0.981707	0.999813	1	6210	tags=32%, list=28%, signal=45%
YAGI_AML_SURVIVAL	104	0.163449	0.720769	0.981132	1	1	5016	tags=27%, list=23%, signal=35%
BOYAULT_LIVER_CANCER_SUBCLASS_G23_UP	41	0.194728	0.717324	0.937337	1	1	4289	tags=20%, list=20%, signal=24%
KUMAMOTO_RESPONSE_TO_NUTLIN_3A_DN	9	0.293026	0.71515	0.829384	1	1	15478	tags=100%, list=71%, signal=341%
MYLLYKANGAS_AMPLIFICATION_HOT_SPOT_29	6	0.335958	0.715061	0.821739	1	1	575	tags=17%, list=3%, signal=17%
HEIDENBLAD_AMPLICON_12P11_12_UP	28	0.213374	0.714457	0.903955	1	1	2703	tags=18%, list=12%, signal=20%
TURJANSKI_MAPK8_AND_MAPK9_TARGETS	7	0.318297	0.712923	0.792237	1	1	1949	tags=14%, list=9%, signal=16%
POS_HISTAMINE_RESPONSE_NETWORK	28	0.215969	0.712212	0.893035	1	1	4821	tags=29%, list=22%, signal=37%
ABE_VEGFA_TARGETS	15	0.259525	0.711392	0.882205	1	1	3717	tags=27%, list=17%, signal=32%
OUYANG_PROSTATE_CANCER_PROGRESSION_UP	18	0.239247	0.71105	0.869565	1	1	5257	tags=28%, list=24%, signal=37%
YU_BAP1_TARGETS	24	0.222959	0.710987	0.873711	1	1	6076	tags=38%, list=28%, signal=52%
KIM_BIPOLAR_DISORDER_OLIGODENDROCYTE_DENSITY_CORR_UP	563	0.133394	0.70925	1	1	1	2975	tags=11%, list=14%, signal=12%
DAUER_STAT3_TARGETS_UP	43	0.189849	0.708957	0.939314	1	1	3828	tags=26%, list=17%, signal=31%
LIANG_HEMATOPOIESIS_STEM_CELL_NUMBER_LARGE_VS_TINY_UP	33	0.205373	0.708028	0.907859	1	1	3137	tags=18%, list=14%, signal=21%
ZWANG_CLASS_3_TRANSIENTLY_INDUCED_BY_EGF	178	0.151141	0.707501	1	1	1	4822	tags=23%, list=22%, signal=29%
PRAMOONJAGO_SOX4_TARGETS_DN	43	0.199038	0.706501	0.931319	1	1	5402	tags=30%, list=25%, signal=40%
ZHENG_FOXP3_TARGETS_UP	20	0.231203	0.705691	0.870324	1	1	3844	tags=25%, list=18%, signal=30%
TURASHVILI_BREAST_CARCINOMA_DUCTAL_VS_LOBULAR_UP	13	0.265975	0.70453	0.820449	1	1	16071	tags=100%, list=73%, signal=376%
SCHMAHL_PDGF_SIGNALING	8	0.303203	0.702766	0.828508	1	1	15255	tags=100%, list=70%, signal=330%
GRAESSMANN_APOPTOSIS_BY_DOXORUBICIN_DN	1388	0.124353	0.700869	1	1	1	5402	tags=23%, list=25%, signal=29%
HASLINGER_B_CLL_WITH_13Q14_DELETION	19	0.232114	0.700702	0.872236	1	1	1459	tags=11%, list=7%, signal=11%
YAMANAKA_GLIOBLASTOMA_SURVIVAL_UP	10	0.280331	0.698759	0.864608	1	1	3417	tags=30%, list=16%, signal=36%
SUZUKI_RESPONSE_TO_TSA	14	0.255181	0.696553	0.853717	1	1	5270	tags=36%, list=24%, signal=47%
YAMASHITA_SILENCED_BY_METHYLATION	5	0.345061	0.696229	0.834884	1	1	14338	tags=100%, list=65%, signal=290%
HOUSTIS_ROS	32	0.201256	0.695788	0.912234	1	1	1903	tags=13%, list=9%, signal=14%
WOTTON_RUNX_TARGETS_UP	16	0.2412	0.695719	0.875949	1	1	5392	tags=38%, list=25%, signal=50%
SANSOM_APC_TARGETS_UP	102	0.160311	0.695572	0.982699	1	1	5444	tags=29%, list=25%, signal=39%
MARKEY_RB1_CHRONIC_LOF_UP	106	0.15935	0.693211	0.989583	1	1	5954	tags=32%, list=27%, signal=44%
STAMBOLSKY_BOUND_BY_MUTATED_TP53	13	0.258982	0.693096	0.854503	1	1	16224	tags=100%, list=74%, signal=386%
BRACHAT_RESPONSE_TO_CAMPTOTHECIN_DN	33	0.200848	0.692833	0.935802	1	1	6415	tags=36%, list=29%, signal=51%
ZEILSTRA_CD44_TARGETS_UP	6	0.324591	0.692235	0.846491	1	1	5883	tags=67%, list=27%, signal=91%
SHEPARD_BMYB_TARGETS	59	0.178168	0.692178	0.960843	0.99949	1	3944	tags=20%, list=18%, signal=25%
WANG_RESPONSE_TO_FORSKOLIN_UP	18	0.23151	0.690869	0.871935	0.99962	1	5229	tags=33%, list=24%, signal=44%
DORN_ADENOVIRUS_INFECTION_12HR_DN	28	0.210694	0.688671	0.928767	1	1	3517	tags=18%, list=16%, signal=21%
MARTINEZ_RESPONSE_TO_TRABECTEDIN_DN	210	0.144128	0.687953	1	1	1	7039	tags=33%, list=32%, signal=48%
ITO_PTTG1_TARGETS_DN	9	0.287152	0.687814	0.864286	0.999416	1	5484	tags=44%, list=25%, signal=59%
DACOSTA_UV_RESPONSE_VIA_ERCC3_DN	690	0.126519	0.68618	1	0.999776	1	5339	tags=23%, list=24%, signal=29%
KORKOLA_EMBRYONAL_CARCINOMA_UP	34	0.199271	0.684782	0.946381	0.999939	1	6283	tags=35%, list=29%, signal=49%
GALIE_TUMOR_ANGIOGENESIS	8	0.303454	0.684583	0.85023	0.999217	1	756	tags=13%, list=3%, signal=13%
JEON_SMAD6_TARGETS_DN	18	0.233546	0.683274	0.884337	0.999383	1	1681	tags=11%, list=8%, signal=12%
FINETTI_BREAST_CANCERS_KINOME_BLUE	19	0.224578	0.678965	0.90099	1	1	3699	tags=26%, list=17%, signal=32%
JIANG_HYPOXIA_VIA_VHL	27	0.203732	0.678217	0.958115	1	1	7508	tags=37%, list=34%, signal=56%
DIAZ_CHRONIC_MEYLOGENOUS_LEUKEMIA_UP	1179	0.123513	0.678102	1	1	1	5348	tags=22%, list=24%, signal=27%
MILI_PSEUDOPODIA_HAPTOTAXIS_UP	381	0.132917	0.678017	0.993333	0.99985	1	7031	tags=31%, list=32%, signal=45%
CHANDRAN_METASTASIS_TOP50_UP	26	0.211204	0.675691	0.917293	1	1	2659	tags=15%, list=12%, signal=17%
STAMBOLSKY_RESPONSE_TO_VITAMIN_D3_DN	15	0.239423	0.675251	0.897561	1	1	6353	tags=40%, list=29%, signal=56%
LIU_NASOPHARYNGEAL_CARCINOMA	51	0.173797	0.670722	0.970414	1	1	1879	tags=12%, list=9%, signal=13%
MAYBURD_RESPONSE_TO_L663536_DN	42	0.185952	0.6699	0.965116	1	1	7208	tags=40%, list=33%, signal=60%
TIEN_INTESTINE_PROBIOTICS_2HR_UP	20	0.223396	0.66958	0.903704	1	1	3335	tags=10%, list=15%, signal=12%
KONG_E2F3_TARGETS	76	0.161647	0.667806	0.996979	1	1	6742	tags=32%, list=31%, signal=45%
LIANG_HEMATOPOIESIS_STEM_CELL_NUMBER_SMALL_VS_HUGE_DN	28	0.20356	0.665227	0.922667	1	1	3250	tags=14%, list=15%, signal=17%
HOLLEMAN_DAUNORUBICIN_ALL_DN	7	0.299488	0.664441	0.864745	1	1	15336	tags=100%, list=70%, signal=334%
CHIANG_LIVER_CANCER_SUBCLASS_UNANNOTATED_DN	155	0.143015	0.662571	1	1	1	7244	tags=35%, list=33%, signal=53%
PEART_HDAC_PROLIFERATION_CLUSTER_UP	53	0.176692	0.657536	0.983333	1	1	6355	tags=32%, list=29%, signal=45%
KUUSELO_PANCREATIC_CANCER_19Q13_AMPLIFICATION	18	0.224571	0.654507	0.906566	1	1	5654	tags=39%, list=26%, signal=52%
GRADE_METASTASIS_DN	39	0.183596	0.653464	0.974063	1	1	6166	tags=31%, list=28%, signal=43%
PUJANA_BRCA2_PCC_NETWORK	347	0.128788	0.652984	1	1	1	6295	tags=30%, list=29%, signal=41%
VANDESLUIS_COMMD1_TARGETS_GROUP_4_UP	16	0.231276	0.652961	0.935567	1	1	4453	tags=31%, list=20%, signal=39%
ZHU_SKIL_TARGETS_DN	8	0.280822	0.652501	0.863291	1	1	702	tags=13%, list=3%, signal=13%
CASTELLANO_HRAS_TARGETS_UP	5	0.323723	0.645451	0.900227	1	1	14805	tags=100%, list=68%, signal=309%
GARGALOVIC_RESPONSE_TO_OXIDIZED_PHOSPHOLIPIDS_GREY_UP	14	0.234357	0.644903	0.933498	1	1	1385	tags=14%, list=6%, signal=15%
SUZUKI_AMPLIFIED_IN_ORAL_CANCER	15	0.225789	0.644456	0.938575	1	1	5344	tags=33%, list=24%, signal=44%
BOGNI_TREATMENT_RELATED_MYELOID_LEUKEMIA_DN	25	0.194781	0.641948	0.956633	1	1	2566	tags=12%, list=12%, signal=14%
PENG_GLUTAMINE_DEPRIVATION_UP	37	0.177408	0.63886	0.979885	1	1	5270	tags=27%, list=24%, signal=36%
BORCZUK_MALIGNANT_MESOTHELIOMA_UP	257	0.130443	0.638735	1	1	1	7134	tags=31%, list=33%, signal=46%
ZHAN_MULTIPLE_MYELOMA_CD1_AND_CD2_DN	38	0.179312	0.63738	0.986376	1	1	5357	tags=32%, list=24%, signal=42%
ENK_UV_RESPONSE_KERATINOCYTE_DN	405	0.123353	0.636799	1	1	1	6707	tags=29%, list=31%, signal=42%
HAHTOLA_MYCOSIS_FUNGOIDES_CD4_DN	94	0.148908	0.636374	0.993569	1	1	5306	tags=24%, list=24%, signal=32%
CROONQUIST_IL6_DEPRIVATION_DN	83	0.152602	0.633944	1	1	1	6295	tags=31%, list=29%, signal=44%
YAGI_AML_RELAPSE_PROGNOSIS	30	0.190114	0.63272	0.976879	1	1	6599	tags=40%, list=30%, signal=57%
NIKOLSKY_BREAST_CANCER_8P12_P11_AMPLICON	43	0.170812	0.631853	0.976127	1	1	6503	tags=37%, list=30%, signal=53%
SIMBULAN_PARP1_TARGETS_DN	15	0.223887	0.630488	0.928395	1	1	5146	tags=33%, list=24%, signal=44%
STARK_BRAIN_22Q11_DELETION	7	0.27897	0.627518	0.911422	1	1	727	tags=14%, list=3%, signal=15%
NADELLA_PRKAR1A_TARGETS_UP	8	0.268513	0.622302	0.927928	1	1	4316	tags=25%, list=20%, signal=31%
SCHURINGA_STAT5A_TARGETS_DN	13	0.223986	0.619986	0.938242	1	1	4461	tags=31%, list=20%, signal=39%
KORKOLA_SEMINOMA_DN	9	0.247144	0.618659	0.916859	1	1	16482	tags=100%, list=75%, signal=405%
POTTI_CYTOXAN_SENSITIVITY	31	0.182901	0.614916	0.978437	1	1	5750	tags=32%, list=26%, signal=44%
KORKOLA_EMBRYONAL_CARCINOMA_DN	10	0.247155	0.613624	0.927928	1	1	16482	tags=100%, list=75%, signal=405%
MILI_PSEUDOPODIA	30	0.182376	0.613276	0.958974	1	1	3367	tags=17%, list=15%, signal=20%
LIU_TOPBP1_TARGETS	9	0.257846	0.613087	0.933045	1	1	1884	tags=11%, list=9%, signal=12%
FAELT_B_CLL_WITH_VH_REARRANGEMENTS_DN	36	0.174227	0.612089	0.974432	1	1	1845	tags=11%, list=8%, signal=12%
YAO_TEMPORAL_RESPONSE_TO_PROGESTERONE_CLUSTER_17	152	0.132064	0.608765	1	1	1	4942	tags=18%, list=23%, signal=24%
MILI_PSEUDOPODIA_CHEMOTAXIS_UP	49	0.159849	0.608091	0.991404	1	1	4563	tags=20%, list=21%, signal=26%
KAAB_FAILED_HEART_VENTRICLE_DN	34	0.176477	0.607642	0.986376	1	1	3307	tags=15%, list=15%, signal=17%
KORKOLA_CHORIOCARCINOMA_DN	9	0.247144	0.607265	0.93617	1	1	16482	tags=100%, list=75%, signal=405%
ZHANG_BREAST_CANCER_PROGENITORS_UP	319	0.119135	0.605688	1	1	1	5856	tags=26%, list=27%, signal=35%
LUND_SILENCED_BY_METHYLATION	15	0.207808	0.599372	0.948087	1	1	17344	tags=100%, list=79%, signal=481%
CONRAD_GERMLINE_STEM_CELL	11	0.235535	0.598316	0.938053	1	1	2823	tags=18%, list=13%, signal=21%
PUIFFE_INVASION_INHIBITED_BY_ASCITES_DN	111	0.134401	0.597705	1	1	1	5440	tags=24%, list=25%, signal=32%
KAYO_CALORIE_RESTRICTION_MUSCLE_DN	70	0.146123	0.594742	1	1	1	2315	tags=10%, list=11%, signal=11%
GENTILE_UV_RESPONSE_CLUSTER_D2	33	0.170678	0.591974	0.992248	1	1	6496	tags=24%, list=30%, signal=34%
FLECHNER_PBL_KIDNEY_TRANSPLANT_REJECTED_VS_OK_DN	43	0.159248	0.589438	0.989189	1	1	4242	tags=14%, list=19%, signal=17%
DARWICHE_PAPILLOMA_PROGRESSION_RISK	59	0.149238	0.589177	1	1	1	5381	tags=29%, list=25%, signal=38%
HOEBEKE_LYMPHOID_STEM_CELL_DN	75	0.142605	0.588033	0.996942	1	1	6034	tags=31%, list=28%, signal=42%
RODRIGUES_NTN1_TARGETS_UP	14	0.217813	0.584706	0.963918	1	1	2201	tags=14%, list=10%, signal=16%
MATTIOLI_MGUS_VS_MULTIPLE_MYELOMA	11	0.222089	0.583347	0.949881	1	1	4623	tags=36%, list=21%, signal=46%
MCBRYAN_TERMINAL_END_BUD_DN	5	0.289377	0.581774	0.93228	1	1	1871	tags=20%, list=9%, signal=22%
ZEMBUTSU_SENSITIVITY_TO_VINBLASTINE	14	0.214079	0.580281	0.960648	1	1	700	tags=7%, list=3%, signal=7%
THILLAINADESAN_ZNF217_TARGETS_DN	5	0.285794	0.579659	0.92	1	1	5246	tags=40%, list=24%, signal=53%
LOPEZ_MESOTHELIOMA_SURVIVAL_WORST_VS_BEST_DN	6	0.273613	0.579004	0.922902	1	1	1637	tags=17%, list=7%, signal=18%
GERHOLD_RESPONSE_TO_TZD_DN	13	0.210965	0.577639	0.970732	1	1	4217	tags=23%, list=19%, signal=29%
MULLIGAN_NTF3_SIGNALING_VIA_INSR_AND_IGF1R_DN	9	0.236679	0.577047	0.944072	1	1	16711	tags=100%, list=76%, signal=422%
CEBALLOS_TARGETS_OF_TP53_AND_MYC_DN	33	0.166	0.576865	0.984169	0.999842	1	5808	tags=33%, list=27%, signal=45%
SEIDEN_ONCOGENESIS_BY_MET	70	0.140675	0.573782	1	0.99993	1	1689	tags=7%, list=8%, signal=8%
SCHUHMACHER_MYC_TARGETS_DN	7	0.254204	0.569134	0.947242	1	1	16327	tags=100%, list=75%, signal=393%
RODRIGUES_NTN1_AND_DCC_TARGETS	29	0.169792	0.567477	0.992208	1	1	18178	tags=100%, list=83%, signal=589%
GOLDRATH_HOMEOSTATIC_PROLIFERATION	137	0.12581	0.566323	1	0.999524	1	5280	tags=20%, list=24%, signal=27%
ZEILSTRA_CD44_TARGETS_DN	7	0.25233	0.562858	0.961723	0.999607	1	16368	tags=100%, list=75%, signal=396%
WEIGEL_OXIDATIVE_STRESS_BY_HNE_AND_H2O2	39	0.156444	0.560905	1	0.999258	1	3910	tags=18%, list=18%, signal=22%
CREIGHTON_AKT1_SIGNALING_VIA_MTOR_DN	18	0.183966	0.551721	0.985258	1	1	1743	tags=11%, list=8%, signal=12%
OXFORD_RALA_OR_RALB_TARGETS_DN	19	0.183703	0.544514	0.987013	1	1	4494	tags=26%, list=21%, signal=33%
DITTMER_PTHLH_TARGETS_DN	63	0.133575	0.537593	1	1	1	6052	tags=30%, list=28%, signal=42%
PHONG_TNF_TARGETS_DN	7	0.246741	0.536376	0.962353	1	1	3409	tags=29%, list=16%, signal=34%
BIDUS_METASTASIS_UP	156	0.116825	0.534466	1	1	1	5457	tags=21%, list=25%, signal=28%
TERAMOTO_OPN_TARGETS_CLUSTER_1	11	0.205424	0.531822	0.96028	1	1	967	tags=9%, list=4%, signal=10%
NOUZOVA_TRETINOIN_AND_H4_ACETYLATION	98	0.121283	0.530854	1	1	1	6019	tags=28%, list=27%, signal=38%
BAUS_TFF2_TARGETS_DN	10	0.210318	0.529418	0.97351	0.999751	1	4466	tags=30%, list=20%, signal=38%
MARSON_FOXP3_CORE_DIRECT_TARGETS	15	0.185399	0.516607	0.9825	1	1	3360	tags=20%, list=15%, signal=24%
WIEMANN_TELOMERE_SHORTENING_AND_CHRONIC_LIVER_DAMAGE_DN	6	0.243423	0.515084	0.980435	1	1	1944	tags=17%, list=9%, signal=18%
MITSIADES_RESPONSE_TO_APLIDIN_DN	201	0.105567	0.506972	1	1	1	6707	tags=31%, list=31%, signal=44%
CARD_MIR302A_TARGETS	66	0.12633	0.503858	0.996942	1	1	5132	tags=23%, list=23%, signal=30%
IKEDA_MIR133_TARGETS_UP	42	0.135553	0.49604	1	1	1	6876	tags=33%, list=31%, signal=49%
FARMER_BREAST_CANCER_CLUSTER_2	29	0.141844	0.484509	0.995098	1	1	18789	tags=100%, list=86%, signal=705%
KAPOSI_LIVER_CANCER_MET_UP	16	0.16602	0.476515	0.994975	1	1	5398	tags=25%, list=25%, signal=33%
WU_ALZHEIMER_DISEASE_UP	10	0.18704	0.469263	0.995215	1	1	4812	tags=30%, list=22%, signal=38%
CHOI_ATL_STAGE_PREDICTOR	30	0.139472	0.467757	0.994859	1	1	3826	tags=17%, list=17%, signal=20%
NAM_FXYD5_TARGETS_DN	15	0.160953	0.451715	0.997506	1	1	18369	tags=100%, list=84%, signal=621%
SEMBA_FHIT_TARGETS_DN	9	0.177132	0.435303	0.997722	1	1	18014	tags=100%, list=82%, signal=564%
MILICIC_FAMILIAL_ADENOMATOUS_POLYPOSIS_UP	7	0.194503	0.427109	0.997608	0.999805	1	5007	tags=29%, list=23%, signal=37%
PECE_MAMMARY_STEM_CELL_DN	103	0.0987544	0.426518	1	0.999014	1	3369	tags=8%, list=15%, signal=9%
