# Supplementary material for: RUNX1, a transcription factor mutated in breast cancer, controls the fate of ER-positive mammary luminal cells
Source: eLife journal article supplement (doi:10.7554/elife.03881), 2014-11-21
Supplement: supp [file elife_poa_e03881_Figure_4_source_data_2.xlsx]

## Sheet: gsea_report_for_wt_135325433897
Figure 4-Source data 2: Gene sets from the MSigDB database C2-CGP (chemical and genetic perturbations, v3.1) enriched in Runx1-WT luminal cells
Enrichment scores with FDR q-val≤0.25 are significant in GSEA, based on Subramanian et al. PNAS 2005
NAME	SIZE	ES	NES	NOM p-val	FDR q-val	FWER p-val	RANK AT MAX	LEADING EDGE
CLASPER_LYMPHATIC_VESSELS_DURING_METASTASIS_DN	31	-0.718046	-2.2004	0	0	0	3377	tags=65%, list=15%, signal=76%
ANASTASSIOU_CANCER_MESENCHYMAL_TRANSITION_SIGNATURE	57	-0.604991	-2.17013	0	0.00191503	0.004	3377	tags=54%, list=15%, signal=64%
PETRETTO_CARDIAC_HYPERTROPHY	31	-0.683489	-2.1566	0	0.00159337	0.005	1843	tags=39%, list=8%, signal=42%
LIM_MAMMARY_LUMINAL_MATURE_UP	95	-0.538448	-2.10743	0	0.00334423	0.014	5756	tags=55%, list=26%, signal=74%
TURASHVILI_BREAST_LOBULAR_CARCINOMA_VS_LOBULAR_NORMAL_DN	60	-0.5837	-2.1062	0	0.00267538	0.014	3388	tags=43%, list=15%, signal=51%
WALLACE_PROSTATE_CANCER_RACE_UP	214	-0.486198	-2.07648	0	0.00510828	0.031	5104	tags=48%, list=23%, signal=62%
FARMER_BREAST_CANCER_CLUSTER_5	18	-0.771927	-2.07224	0	0.00437853	0.031	3377	tags=72%, list=15%, signal=85%
SCHUETZ_BREAST_CANCER_DUCTAL_INVASIVE_UP	281	-0.460493	-2.03656	0	0.00694645	0.056	4724	tags=41%, list=22%, signal=52%
TURASHVILI_BREAST_LOBULAR_CARCINOMA_VS_DUCTAL_NORMAL_UP	54	-0.582074	-2.01957	0	0.00829753	0.075	4675	tags=54%, list=21%, signal=68%
PLASARI_TGFB1_TARGETS_10HR_DN	223	-0.466612	-2.00902	0	0.00918986	0.091	2973	tags=30%, list=14%, signal=34%
URS_ADIPOCYTE_DIFFERENTIATION_DN	22	-0.694952	-2.00512	0	0.00861795	0.094	4623	tags=64%, list=21%, signal=81%
THUM_MIR21_TARGETS_HEART_DISEASE_UP	16	-0.741036	-1.99865	0	0.00838146	0.098	2075	tags=63%, list=9%, signal=69%
KANG_GIST_WITH_PDGFRA_UP	45	-0.583629	-1.98678	0	0.0095802	0.122	5442	tags=58%, list=25%, signal=77%
WINTER_HYPOXIA_DN	39	-0.595304	-1.95766	0	0.014156	0.19	2920	tags=44%, list=13%, signal=50%
LANDIS_BREAST_CANCER_PROGRESSION_DN	64	-0.54426	-1.95476	0	0.0138514	0.197	4368	tags=45%, list=20%, signal=56%
BOQUEST_STEM_CELL_UP	229	-0.446055	-1.93688	0	0.0171636	0.25	3739	tags=36%, list=17%, signal=43%
WIELAND_UP_BY_HBV_INFECTION	75	-0.52348	-1.92819	0	0.0190272	0.29	5925	tags=52%, list=27%, signal=71%
SMID_BREAST_CANCER_NORMAL_LIKE_UP	366	-0.427252	-1.92671	0	0.0185548	0.298	4321	tags=38%, list=20%, signal=47%
GUO_HEX_TARGETS_DN	57	-0.544062	-1.92015	0	0.019488	0.321	4613	tags=39%, list=21%, signal=49%
SANA_RESPONSE_TO_IFNG_UP	48	-0.563673	-1.91625	0	0.0193711	0.33	3387	tags=40%, list=15%, signal=47%
YAO_TEMPORAL_RESPONSE_TO_PROGESTERONE_CLUSTER_15	30	-0.607473	-1.91564	0	0.0186313	0.332	3858	tags=43%, list=18%, signal=53%
BOQUEST_STEM_CELL_DN	174	-0.459893	-1.91208	0	0.0189606	0.352	2747	tags=29%, list=13%, signal=33%
ONDER_CDH1_TARGETS_2_UP	210	-0.437889	-1.88151	0	0.0306943	0.527	6089	tags=49%, list=28%, signal=67%
BERENJENO_TRANSFORMED_BY_RHOA_DN	335	-0.415858	-1.87109	0	0.0345953	0.583	6637	tags=48%, list=30%, signal=68%
HARRIS_BRAIN_CANCER_PROGENITORS	32	-0.578574	-1.87009	0.0016	0.0336312	0.589	3462	tags=38%, list=16%, signal=44%
NAKAYAMA_SOFT_TISSUE_TUMORS_PCA2_DN	65	-0.515791	-1.8672	0	0.0339587	0.604	2923	tags=37%, list=13%, signal=42%
LIU_VAV3_PROSTATE_CARCINOGENESIS_UP	78	-0.496935	-1.85454	0	0.0389077	0.666	5452	tags=46%, list=25%, signal=61%
PICCALUGA_ANGIOIMMUNOBLASTIC_LYMPHOMA_UP	176	-0.437192	-1.83727	0	0.0476405	0.754	4434	tags=39%, list=20%, signal=48%
VART_KSHV_INFECTION_ANGIOGENIC_MARKERS_UP	152	-0.439135	-1.8183	0	0.0602967	0.85	4228	tags=38%, list=19%, signal=47%
WANG_IMMORTALIZED_BY_HOXA9_AND_MEIS1_DN	21	-0.630742	-1.81659	0	0.0595301	0.854	1640	tags=33%, list=7%, signal=36%
KIM_GLIS2_TARGETS_UP	73	-0.493804	-1.81345	0	0.0602339	0.865	4462	tags=45%, list=20%, signal=57%
LOPEZ_MESOTHELIOMA_SURVIVAL_DN	11	-0.755652	-1.80914	0.00165563	0.0623582	0.882	2223	tags=36%, list=10%, signal=40%
BERTUCCI_INVASIVE_CARCINOMA_DUCTAL_VS_LOBULAR_DN	41	-0.540356	-1.80725	0.00156006	0.0617136	0.886	3739	tags=46%, list=17%, signal=56%
WHITESIDE_CISPLATIN_RESISTANCE_DN	9	-0.811519	-1.80573	0.00176367	0.0611167	0.89	49	tags=11%, list=0%, signal=11%
SMID_BREAST_CANCER_LUMINAL_A_UP	73	-0.48584	-1.80447	0.00149031	0.0603519	0.892	3570	tags=33%, list=16%, signal=39%
YU_MYC_TARGETS_DN	42	-0.535264	-1.79686	0	0.0651612	0.912	4891	tags=43%, list=22%, signal=55%
YANG_BREAST_CANCER_ESR1_BULK_UP	19	-0.647176	-1.79454	0.0016	0.0655748	0.919	2756	tags=37%, list=13%, signal=42%
SCHLINGEMANN_SKIN_CARCINOGENESIS_TPA_DN	25	-0.591961	-1.79303	0.00653595	0.0651844	0.922	2075	tags=32%, list=9%, signal=35%
TSENG_ADIPOGENIC_POTENTIAL_DN	41	-0.536603	-1.79156	0	0.0645205	0.927	5044	tags=49%, list=23%, signal=63%
RICKMAN_TUMOR_DIFFERENTIATED_WELL_VS_MODERATELY_UP	71	-0.484069	-1.78821	0.00145138	0.0657999	0.939	6370	tags=49%, list=29%, signal=69%
ONO_AML1_TARGETS_UP	23	-0.607105	-1.78693	0	0.0651993	0.942	3612	tags=48%, list=16%, signal=57%
IIZUKA_LIVER_CANCER_PROGRESSION_G1_G2_UP	11	-0.732293	-1.78319	0.00165837	0.0667214	0.952	3107	tags=45%, list=14%, signal=53%
CUI_TCF21_TARGETS_UP	31	-0.568275	-1.77442	0	0.0734273	0.968	1734	tags=39%, list=8%, signal=42%
ROY_WOUND_BLOOD_VESSEL_UP	40	-0.533496	-1.77367	0.00309119	0.0722812	0.969	2783	tags=35%, list=13%, signal=40%
MCDOWELL_ACUTE_LUNG_INJURY_DN	38	-0.541227	-1.77355	0.00310078	0.0708459	0.969	820	tags=21%, list=4%, signal=22%
LEE_BMP2_TARGETS_UP	592	-0.377412	-1.77329	0	0.0695547	0.97	6250	tags=43%, list=29%, signal=58%
YAMASHITA_LIVER_CANCER_WITH_EPCAM_DN	11	-0.748587	-1.77291	0	0.0683607	0.97	1731	tags=36%, list=8%, signal=39%
INAMURA_LUNG_CANCER_SCC_DN	13	-0.703398	-1.77229	0.00167504	0.067475	0.972	2429	tags=46%, list=11%, signal=52%
LEE_DIFFERENTIATING_T_LYMPHOCYTE	141	-0.431868	-1.76945	0	0.0687174	0.975	5140	tags=38%, list=23%, signal=50%
LIEN_BREAST_CARCINOMA_METAPLASTIC_VS_DUCTAL_DN	73	-0.476309	-1.76388	0.00144509	0.072186	0.98	2636	tags=32%, list=12%, signal=36%
FLECHNER_BIOPSY_KIDNEY_TRANSPLANT_REJECTED_VS_OK_UP	75	-0.47083	-1.7638	0	0.0707896	0.98	6083	tags=56%, list=28%, signal=77%
WONG_ENDMETRIUM_CANCER_DN	68	-0.479639	-1.76148	0.00146628	0.0714316	0.981	5128	tags=49%, list=23%, signal=63%
PLASARI_TGFB1_SIGNALING_VIA_NFIC_1HR_DN	83	-0.45497	-1.76095	0.00146843	0.0706435	0.982	4603	tags=40%, list=21%, signal=50%
MIKKELSEN_MEF_LCP_WITH_H3K4ME3	99	-0.454983	-1.7574	0	0.0726191	0.989	4257	tags=34%, list=19%, signal=42%
HOELZEL_NF1_TARGETS_DN	83	-0.468565	-1.75702	0	0.0716477	0.989	2658	tags=31%, list=12%, signal=36%
MIKKELSEN_IPS_LCP_WITH_H3K4ME3	117	-0.436529	-1.75164	0.0013947	0.0750521	0.992	4773	tags=39%, list=22%, signal=50%
DURAND_STROMA_MAX_UP	242	-0.399115	-1.73955	0	0.0861384	0.994	3508	tags=29%, list=16%, signal=35%
SMID_BREAST_CANCER_BASAL_DN	527	-0.373937	-1.73689	0	0.0870822	0.995	6165	tags=42%, list=28%, signal=57%
SWEET_LUNG_CANCER_KRAS_DN	384	-0.383247	-1.73597	0	0.0864354	0.995	4007	tags=31%, list=18%, signal=37%
TAKEDA_TARGETS_OF_NUP98_HOXA9_FUSION_16D_UP	124	-0.425814	-1.73471	0	0.0864484	0.995	4699	tags=37%, list=21%, signal=47%
MARKEY_RB1_ACUTE_LOF_UP	184	-0.412577	-1.73441	0	0.0851883	0.995	5565	tags=41%, list=25%, signal=55%
NAKAYAMA_SOFT_TISSUE_TUMORS_PCA1_UP	57	-0.487626	-1.73436	0	0.0839387	0.995	5725	tags=49%, list=26%, signal=66%
VALK_AML_CLUSTER_9	27	-0.562388	-1.73193	0.00483092	0.084714	0.995	3462	tags=48%, list=16%, signal=57%
WEST_ADRENOCORTICAL_TUMOR_MARKERS_DN	19	-0.62077	-1.72738	0.00648298	0.0885467	0.996	5077	tags=58%, list=23%, signal=75%
BOYAULT_LIVER_CANCER_SUBCLASS_G3_DN	44	-0.512462	-1.72556	0.00151057	0.0889679	0.996	3773	tags=39%, list=17%, signal=47%
MIYAGAWA_TARGETS_OF_EWSR1_ETS_FUSIONS_UP	206	-0.400983	-1.71987	0	0.0941789	0.998	4073	tags=30%, list=19%, signal=37%
MIKKELSEN_ES_HCP_WITH_H3K27ME3	35	-0.531589	-1.71731	0.00159236	0.0955899	0.999	1891	tags=29%, list=9%, signal=31%
VECCHI_GASTRIC_CANCER_ADVANCED_VS_EARLY_UP	140	-0.418763	-1.71406	0	0.0977909	1	3713	tags=31%, list=17%, signal=37%
GRANDVAUX_IFN_RESPONSE_NOT_VIA_IRF3	12	-0.688923	-1.71253	0.0034904	0.0980692	1	5725	tags=75%, list=26%, signal=102%
GEORGANTAS_HSC_MARKERS	49	-0.492423	-1.71123	0.00152439	0.0979537	1	3683	tags=37%, list=17%, signal=44%
SMID_BREAST_CANCER_RELAPSE_IN_LUNG_DN	27	-0.559754	-1.7102	0.0125196	0.0978396	1	3568	tags=48%, list=16%, signal=57%
NIELSEN_SYNOVIAL_SARCOMA_DN	15	-0.66225	-1.7083	0.00166945	0.0989406	1	5722	tags=67%, list=26%, signal=90%
OUYANG_PROSTATE_CANCER_MARKERS	18	-0.620337	-1.70827	0.00318979	0.0975853	1	2095	tags=33%, list=10%, signal=37%
LI_WILMS_TUMOR	25	-0.573455	-1.70169	0.00478469	0.103509	1	5332	tags=52%, list=24%, signal=69%
HAHTOLA_CTCL_PATHOGENESIS	12	-0.678175	-1.70139	0.00707965	0.102628	1	6343	tags=83%, list=29%, signal=117%
BROWNE_INTERFERON_RESPONSIVE_GENES	51	-0.491737	-1.69816	0.00151515	0.10542	1	4827	tags=39%, list=22%, signal=50%
BORCZUK_MALIGNANT_MESOTHELIOMA_DN	78	-0.454816	-1.69608	0.00141443	0.106636	1	3337	tags=28%, list=15%, signal=33%
WOO_LIVER_CANCER_RECURRENCE_DN	61	-0.470679	-1.69171	0	0.110562	1	4408	tags=38%, list=20%, signal=47%
FARMER_BREAST_CANCER_CLUSTER_1	31	-0.541044	-1.69133	0.00625978	0.109563	1	4955	tags=58%, list=23%, signal=75%
POOLA_INVASIVE_BREAST_CANCER_UP	215	-0.393183	-1.68812	0	0.112105	1	5732	tags=41%, list=26%, signal=56%
LIEN_BREAST_CARCINOMA_METAPLASTIC	30	-0.540206	-1.68495	0.0114379	0.114783	1	2733	tags=43%, list=12%, signal=49%
LUI_THYROID_CANCER_CLUSTER_5	12	-0.679346	-1.68336	0.00671141	0.115134	1	2756	tags=50%, list=13%, signal=57%
LINDSTEDT_DENDRITIC_CELL_MATURATION_D	58	-0.478809	-1.683	0	0.114115	1	5452	tags=40%, list=25%, signal=53%
WU_SILENCED_BY_METHYLATION_IN_BLADDER_CANCER	46	-0.494555	-1.68241	0.00298507	0.113683	1	4675	tags=48%, list=21%, signal=61%
RUIZ_TNC_TARGETS_UP	128	-0.413437	-1.67779	0.00274348	0.118192	1	4548	tags=36%, list=21%, signal=45%
SEKI_INFLAMMATORY_RESPONSE_LPS_DN	22	-0.590006	-1.67288	0.00827815	0.12302	1	3570	tags=45%, list=16%, signal=54%
PAPASPYRIDONOS_UNSTABLE_ATEROSCLEROTIC_PLAQUE_DN	35	-0.51353	-1.67166	0.012966	0.12308	1	2371	tags=34%, list=11%, signal=38%
STEGER_ADIPOGENESIS_DN	25	-0.566258	-1.67067	0.0150754	0.12307	1	1797	tags=36%, list=8%, signal=39%
LEIN_CHOROID_PLEXUS_MARKERS	84	-0.440976	-1.67029	0.00145773	0.12228	1	6707	tags=48%, list=31%, signal=68%
MIKKELSEN_NPC_ICP_WITH_H3K4ME3	331	-0.37292	-1.66913	0	0.12238	1	4746	tags=34%, list=22%, signal=43%
EINAV_INTERFERON_SIGNATURE_IN_CANCER	18	-0.601826	-1.6669	0.0066778	0.124005	1	7026	tags=72%, list=32%, signal=106%
YANG_MUC2_TARGETS_DUODENUM_3MO_DN	16	-0.619241	-1.66542	0.0101695	0.124614	1	4981	tags=56%, list=23%, signal=73%
MIKKELSEN_ES_ICP_WITH_H3K4ME3	514	-0.357757	-1.66273	0	0.126702	1	4749	tags=33%, list=22%, signal=41%
WANG_MLL_TARGETS	246	-0.381889	-1.66253	0	0.125638	1	6011	tags=43%, list=27%, signal=59%
SABATES_COLORECTAL_ADENOMA_DN	212	-0.384709	-1.66165	0	0.125484	1	2923	tags=26%, list=13%, signal=30%
CADWELL_ATG16L1_TARGETS_UP	80	-0.440638	-1.66101	0.00145138	0.124934	1	3291	tags=38%, list=15%, signal=44%
TONKS_TARGETS_OF_RUNX1_RUNX1T1_FUSION_MONOCYTE_DN	41	-0.502845	-1.65533	0.00158983	0.131342	1	4189	tags=41%, list=19%, signal=51%
MARZEC_IL2_SIGNALING_DN	32	-0.52734	-1.65506	0.00487013	0.130392	1	2533	tags=28%, list=12%, signal=32%
KANG_IMMORTALIZED_BY_TERT_DN	87	-0.431941	-1.65427	0	0.130216	1	3958	tags=29%, list=18%, signal=35%
HERNANDEZ_ABERRANT_MITOSIS_BY_DOCETACEL_4NM_UP	17	-0.605729	-1.65358	0.00827815	0.129786	1	4310	tags=53%, list=20%, signal=66%
GAUSSMANN_MLL_AF4_FUSION_TARGETS_E_UP	81	-0.43875	-1.65344	0.00446429	0.128671	1	5204	tags=38%, list=24%, signal=50%
ICHIBA_GRAFT_VERSUS_HOST_DISEASE_D7_DN	35	-0.516876	-1.65221	0.00754148	0.129174	1	2838	tags=29%, list=13%, signal=33%
NIELSEN_GIST_VS_SYNOVIAL_SARCOMA_DN	18	-0.610689	-1.65211	0.0119658	0.128042	1	4595	tags=50%, list=21%, signal=63%
BAELDE_DIABETIC_NEPHROPATHY_UP	69	-0.450489	-1.65108	0.00603318	0.128089	1	3085	tags=30%, list=14%, signal=35%
CROONQUIST_STROMAL_STIMULATION_UP	49	-0.482264	-1.6505	0.00906344	0.127662	1	4817	tags=47%, list=22%, signal=60%
WATANABE_ULCERATIVE_COLITIS_WITH_CANCER_DN	10	-0.702675	-1.64853	0.00714286	0.129123	1	3323	tags=60%, list=15%, signal=71%
LANDIS_ERBB2_BREAST_TUMORS_324_DN	132	-0.40526	-1.64636	0	0.130937	1	5509	tags=40%, list=25%, signal=53%
WEINMANN_ADAPTATION_TO_HYPOXIA_UP	27	-0.538428	-1.64432	0.0135593	0.132641	1	1734	tags=26%, list=8%, signal=28%
KONDO_EZH2_TARGETS	178	-0.391083	-1.64297	0.00131406	0.133163	1	4886	tags=34%, list=22%, signal=44%
GHANDHI_DIRECT_IRRADIATION_DN	19	-0.586675	-1.64278	0.0278689	0.132204	1	3785	tags=58%, list=17%, signal=70%
ZAMORA_NOS2_TARGETS_DN	89	-0.430918	-1.64145	0.00145773	0.132929	1	2339	tags=17%, list=11%, signal=19%
WESTON_VEGFA_TARGETS	97	-0.415107	-1.64012	0.00138122	0.133676	1	3993	tags=37%, list=18%, signal=45%
DELACROIX_RAR_TARGETS_DN	22	-0.572116	-1.63605	0.0184255	0.138192	1	5404	tags=41%, list=25%, signal=54%
NAKAMURA_CANCER_MICROENVIRONMENT_UP	16	-0.616385	-1.63537	0.0114566	0.137979	1	2444	tags=38%, list=11%, signal=42%
FERRARI_RESPONSE_TO_FENRETINIDE_DN	5	-0.826434	-1.63395	0.0163339	0.138621	1	790	tags=60%, list=4%, signal=62%
RUAN_RESPONSE_TO_TNF_TROGLITAZONE_DN	41	-0.490624	-1.63162	0.00933126	0.140686	1	3925	tags=39%, list=18%, signal=47%
GOERING_BLOOD_HDL_CHOLESTEROL_QTL_CIS	7	-0.78241	-1.63081	0.010327	0.140607	1	912	tags=29%, list=4%, signal=30%
VALK_AML_WITH_T_8_21_TRANSLOCATION	5	-0.847912	-1.63067	0.00506757	0.139667	1	3124	tags=80%, list=14%, signal=93%
NIKOLSKY_BREAST_CANCER_6P24_P22_AMPLICON	16	-0.598771	-1.63057	0.0196399	0.138646	1	2725	tags=44%, list=12%, signal=50%
GILDEA_METASTASIS	23	-0.56749	-1.62838	0.0191693	0.140656	1	5747	tags=52%, list=26%, signal=71%
IKEDA_MIR133_TARGETS_DN	8	-0.745745	-1.62674	0.0155979	0.141928	1	3801	tags=63%, list=17%, signal=76%
DELYS_THYROID_CANCER_DN	199	-0.381977	-1.62414	0	0.144552	1	3362	tags=27%, list=15%, signal=32%
CERVERA_SDHB_TARGETS_1_UP	85	-0.424383	-1.62358	0.00143885	0.144162	1	2945	tags=27%, list=13%, signal=31%
GAUSSMANN_MLL_AF4_FUSION_TARGETS_D_UP	30	-0.524468	-1.62204	0.0110585	0.145066	1	3126	tags=33%, list=14%, signal=39%
LI_CISPLATIN_RESISTANCE_DN	26	-0.545674	-1.62039	0.0127796	0.146386	1	2804	tags=42%, list=13%, signal=48%
VERHAAK_AML_WITH_NPM1_MUTATED_DN	192	-0.379583	-1.61893	0	0.147251	1	3474	tags=29%, list=16%, signal=34%
SERVITJA_LIVER_HNF1A_TARGETS_UP	125	-0.403037	-1.61847	0.00141443	0.146687	1	2945	tags=25%, list=13%, signal=28%
BOWIE_RESPONSE_TO_EXTRACELLULAR_MATRIX	13	-0.641532	-1.6178	0.0241379	0.146558	1	1882	tags=54%, list=9%, signal=59%
SANSOM_APC_TARGETS_DN	318	-0.360878	-1.61697	0	0.14666	1	5081	tags=37%, list=23%, signal=47%
KRASNOSELSKAYA_ILF3_TARGETS_UP	28	-0.531301	-1.61664	0.0115321	0.145959	1	4646	tags=39%, list=21%, signal=50%
MCCABE_HOXC6_TARGETS_DN	17	-0.594797	-1.61615	0.0169205	0.145508	1	6422	tags=53%, list=29%, signal=75%
TAKEDA_TARGETS_OF_NUP98_HOXA9_FUSION_3D_UP	126	-0.40169	-1.616	0.00141443	0.144595	1	4496	tags=40%, list=21%, signal=50%
BEGUM_TARGETS_OF_PAX3_FOXO1_FUSION_UP	53	-0.455531	-1.61484	0.00608828	0.145165	1	2200	tags=25%, list=10%, signal=27%
ROYLANCE_BREAST_CANCER_16Q_COPY_NUMBER_DN	19	-0.580242	-1.60948	0.0163666	0.151732	1	1884	tags=32%, list=9%, signal=35%
LEE_LIVER_CANCER_MYC_UP	50	-0.460659	-1.60812	0.0046875	0.152594	1	1419	tags=18%, list=6%, signal=19%
VERRECCHIA_RESPONSE_TO_TGFB1_C6	5	-0.824412	-1.60656	0.0164835	0.153787	1	2935	tags=60%, list=13%, signal=69%
KOHOUTEK_CCNT2_TARGETS	40	-0.484304	-1.6044	0.00613497	0.155818	1	2712	tags=38%, list=12%, signal=43%
OHGUCHI_LIVER_HNF4A_TARGETS_UP	36	-0.484534	-1.60141	0.0140187	0.159208	1	4594	tags=47%, list=21%, signal=60%
LE_NEURONAL_DIFFERENTIATION_UP	16	-0.600767	-1.60047	0.01473	0.159552	1	1365	tags=38%, list=6%, signal=40%
SCHRAETS_MLL_TARGETS_DN	30	-0.522378	-1.59966	0.00977199	0.159678	1	3564	tags=37%, list=16%, signal=44%
CHIANG_LIVER_CANCER_SUBCLASS_CTNNB1_UP	133	-0.395971	-1.59875	0.0013587	0.159822	1	3684	tags=32%, list=17%, signal=38%
TAKEDA_TARGETS_OF_NUP98_HOXA9_FUSION_8D_UP	118	-0.39642	-1.59823	0.0013986	0.159431	1	4496	tags=37%, list=21%, signal=47%
RODWELL_AGING_KIDNEY_NO_BLOOD_DN	113	-0.398631	-1.59483	0.00140252	0.163223	1	5500	tags=33%, list=25%, signal=44%
TURASHVILI_BREAST_DUCTAL_CARCINOMA_VS_DUCTAL_NORMAL_UP	33	-0.506299	-1.59391	0.0156986	0.163435	1	2075	tags=27%, list=9%, signal=30%
WANG_RESPONSE_TO_FORSKOLIN_DN	9	-0.693996	-1.59069	0.0190641	0.16711	1	2234	tags=33%, list=10%, signal=37%
RODWELL_AGING_KIDNEY_UP	339	-0.351051	-1.59056	0	0.166123	1	5515	tags=36%, list=25%, signal=48%
LU_TUMOR_VASCULATURE_UP	22	-0.561362	-1.58788	0.015	0.169361	1	4552	tags=55%, list=21%, signal=69%
SANDERSON_PPARA_TARGETS	14	-0.625141	-1.58676	0.0207612	0.169916	1	5668	tags=64%, list=26%, signal=87%
HOSHIDA_LIVER_CANCER_LATE_RECURRENCE_UP	51	-0.456582	-1.58463	0.00471698	0.172112	1	4354	tags=35%, list=20%, signal=44%
SANA_TNF_SIGNALING_DN	75	-0.424082	-1.58396	0.00293686	0.171998	1	2935	tags=28%, list=13%, signal=32%
YANG_MUC2_TARGETS_DUODENUM_6MO_DN	13	-0.627085	-1.58394	0.0247117	0.170872	1	4981	tags=62%, list=23%, signal=80%
RICKMAN_HEAD_AND_NECK_CANCER_F	48	-0.463404	-1.58355	0.00754148	0.170409	1	3270	tags=31%, list=15%, signal=37%
KIM_ALL_DISORDERS_OLIGODENDROCYTE_NUMBER_CORR_DN	20	-0.561578	-1.58249	0.0212766	0.170892	1	4574	tags=40%, list=21%, signal=51%
LEE_AGING_MUSCLE_DN	39	-0.473654	-1.5806	0.0141732	0.172868	1	2667	tags=28%, list=12%, signal=32%
GRAESSMANN_RESPONSE_TO_MC_AND_SERUM_DEPRIVATION_UP	168	-0.375558	-1.57753	0.00275862	0.176716	1	4075	tags=33%, list=19%, signal=40%
STEARMAN_TUMOR_FIELD_EFFECT_UP	30	-0.513873	-1.57501	0.0144695	0.179682	1	3687	tags=33%, list=17%, signal=40%
SCHAEFFER_PROSTATE_DEVELOPMENT_12HR_UP	101	-0.405088	-1.57365	0.00283688	0.180815	1	2756	tags=24%, list=13%, signal=27%
ROETH_TERT_TARGETS_UP	10	-0.670659	-1.57156	0.029361	0.182874	1	6753	tags=90%, list=31%, signal=130%
ZHANG_ANTIVIRAL_RESPONSE_TO_RIBAVIRIN_UP	27	-0.520854	-1.57019	0.0131579	0.183885	1	4827	tags=44%, list=22%, signal=57%
CHIANG_LIVER_CANCER_SUBCLASS_PROLIFERATION_DN	138	-0.389373	-1.56945	0	0.183999	1	3645	tags=28%, list=17%, signal=34%
OHASHI_AURKB_TARGETS	8	-0.715733	-1.56905	0.0416667	0.183456	1	3103	tags=38%, list=14%, signal=44%
VECCHI_GASTRIC_CANCER_EARLY_DN	273	-0.356454	-1.56721	0	0.185484	1	4162	tags=29%, list=19%, signal=35%
BEGUM_TARGETS_OF_PAX3_FOXO1_FUSION_AND_PAX3	7	-0.737853	-1.56685	0.0125673	0.184898	1	2265	tags=71%, list=10%, signal=80%
ROZANOV_MMP14_TARGETS_UP	197	-0.364009	-1.56382	0	0.188627	1	4874	tags=34%, list=22%, signal=43%
BUDHU_LIVER_CANCER_METASTASIS_DN	6	-0.773914	-1.55782	0.0286738	0.198036	1	3530	tags=67%, list=16%, signal=79%
PETRETTO_HEART_MASS_QTL_CIS_UP	18	-0.560561	-1.55409	0.0352734	0.203816	1	2881	tags=33%, list=13%, signal=38%
PETROVA_PROX1_TARGETS_DN	54	-0.442137	-1.55274	0.0132548	0.205115	1	3584	tags=37%, list=16%, signal=44%
HOSHIDA_LIVER_CANCER_SUBCLASS_S3	235	-0.357906	-1.55258	0.00125156	0.204127	1	4646	tags=31%, list=21%, signal=40%
ICHIBA_GRAFT_VERSUS_HOST_DISEASE_35D_DN	39	-0.468305	-1.55222	0.0175159	0.203655	1	2119	tags=26%, list=10%, signal=28%
PEDERSEN_METASTASIS_BY_ERBB2_ISOFORM_6	22	-0.535314	-1.55137	0.0296167	0.203948	1	6440	tags=59%, list=29%, signal=84%
WEBER_METHYLATED_HCP_IN_SPERM_DN	19	-0.557967	-1.55108	0.0366667	0.203338	1	1682	tags=26%, list=8%, signal=28%
JAEGER_METASTASIS_UP	37	-0.477536	-1.55086	0.021875	0.202517	1	1637	tags=22%, list=7%, signal=23%
PHESSE_TARGETS_OF_APC_AND_MBD2_UP	12	-0.619534	-1.54967	0.0440457	0.20361	1	1658	tags=33%, list=8%, signal=36%
YANG_BCL3_TARGETS_UP	292	-0.347956	-1.54963	0	0.202522	1	3115	tags=21%, list=14%, signal=24%
FONTAINE_THYROID_TUMOR_UNCERTAIN_MALIGNANCY_UP	25	-0.523564	-1.54842	0.0449251	0.203256	1	3084	tags=36%, list=14%, signal=42%
HO_LIVER_CANCER_VASCULAR_INVASION	10	-0.651793	-1.5466	0.0307167	0.205423	1	3176	tags=40%, list=15%, signal=47%
CHANDRAN_METASTASIS_DN	226	-0.357452	-1.54522	0	0.206729	1	3232	tags=25%, list=15%, signal=29%
KIM_LRRC3B_TARGETS	17	-0.58198	-1.5422	0.0325901	0.210872	1	6753	tags=76%, list=31%, signal=110%
CHYLA_CBFA2T3_TARGETS_UP	303	-0.346787	-1.54094	0	0.211772	1	3768	tags=28%, list=17%, signal=33%
NAKAMURA_LUNG_CANCER_DIFFERENTIATION_MARKERS	10	-0.631411	-1.5408	0.0424448	0.210787	1	4327	tags=70%, list=20%, signal=87%
GAVIN_PDE3B_TARGETS	21	-0.542028	-1.53957	0.0298013	0.211713	1	7106	tags=76%, list=32%, signal=113%
SMID_BREAST_CANCER_RELAPSE_IN_LIVER_DN	10	-0.644735	-1.53782	0.0279146	0.213804	1	1894	tags=40%, list=9%, signal=44%
UROSEVIC_RESPONSE_TO_IMIQUIMOD	16	-0.575403	-1.53741	0.0303541	0.213484	1	5725	tags=63%, list=26%, signal=85%
ZHAN_MULTIPLE_MYELOMA_CD2_UP	35	-0.486022	-1.53591	0.0241546	0.214948	1	2620	tags=29%, list=12%, signal=32%
SCHMIDT_POR_TARGETS_IN_LIMB_BUD_DN	6	-0.78084	-1.5359	0.0209059	0.213791	1	1522	tags=50%, list=7%, signal=54%
WANG_SMARCE1_TARGETS_UP	225	-0.35674	-1.53512	0	0.213934	1	5497	tags=35%, list=25%, signal=46%
SMID_BREAST_CANCER_LUMINAL_B_UP	136	-0.373994	-1.53217	0.00269906	0.218365	1	2636	tags=25%, list=12%, signal=28%
SCHAEFFER_PROSTATE_DEVELOPMENT_AND_CANCER_BOX5_UP	8	-0.692365	-1.52675	0.0367133	0.227824	1	3739	tags=50%, list=17%, signal=60%
LIU_SMARCA4_TARGETS	50	-0.435949	-1.52453	0.0216718	0.230789	1	4346	tags=38%, list=20%, signal=47%
CAIRO_LIVER_DEVELOPMENT_DN	207	-0.354859	-1.52194	0.00252207	0.234605	1	2406	tags=21%, list=11%, signal=24%
ALCALAY_AML_BY_NPM1_LOCALIZATION_DN	160	-0.362744	-1.52024	0.00687758	0.236519	1	6707	tags=46%, list=31%, signal=66%
NIELSEN_SYNOVIAL_SARCOMA_UP	17	-0.558443	-1.51914	0.039801	0.237365	1	2463	tags=35%, list=11%, signal=40%
JOHANSSON_BRAIN_CANCER_EARLY_VS_LATE_DN	44	-0.446043	-1.51833	0.0258359	0.237852	1	3055	tags=25%, list=14%, signal=29%
WAMUNYOKOLI_OVARIAN_CANCER_GRADES_1_2_DN	52	-0.439082	-1.51684	0.0197568	0.239599	1	5453	tags=38%, list=25%, signal=51%
MATZUK_EARLY_ANTRAL_FOLLICLE	11	-0.622475	-1.5167	0.0439367	0.238621	1	2923	tags=36%, list=13%, signal=42%
WOOD_EBV_EBNA1_TARGETS_DN	39	-0.466261	-1.5155	0.0285262	0.239483	1	4077	tags=31%, list=19%, signal=38%
SCHAEFFER_PROSTATE_DEVELOPMENT_AND_CANCER_BOX2_UP	5	-0.779542	-1.51547	0.0287253	0.238296	1	1439	tags=40%, list=7%, signal=43%
IZADPANAH_STEM_CELL_ADIPOSE_VS_BONE_DN	88	-0.394909	-1.51483	0.00712251	0.238325	1	3789	tags=32%, list=17%, signal=38%
ACEVEDO_LIVER_TUMOR_VS_NORMAL_ADJACENT_TISSUE_DN	198	-0.354895	-1.51176	0.00129702	0.243429	1	3768	tags=24%, list=17%, signal=29%
CALVET_IRINOTECAN_SENSITIVE_VS_REVERTED_UP	5	-0.759805	-1.5117	0.0335821	0.242317	1	746	tags=20%, list=3%, signal=21%
WAMUNYOKOLI_OVARIAN_CANCER_LMP_DN	151	-0.367648	-1.51103	0.00136054	0.242322	1	3766	tags=26%, list=17%, signal=31%
WESTON_VEGFA_TARGETS_12HR	34	-0.472164	-1.51088	0.0334347	0.241431	1	2679	tags=38%, list=12%, signal=43%
TURJANSKI_MAPK11_TARGETS	5	-0.795195	-1.51037	0.0201097	0.241269	1	273	tags=20%, list=1%, signal=20%
VILIMAS_NOTCH1_TARGETS_UP	50	-0.434448	-1.50923	0.0204724	0.242504	1	5548	tags=48%, list=25%, signal=64%
NAISHIRO_CTNNB1_TARGETS_WITH_LEF1_MOTIF	6	-0.740126	-1.50922	0.0403509	0.241349	1	3528	tags=67%, list=16%, signal=79%
TORCHIA_TARGETS_OF_EWSR1_FLI1_FUSION_UP	211	-0.350986	-1.50772	0.0037831	0.243226	1	6250	tags=42%, list=29%, signal=58%
KORKOLA_CHORIOCARCINOMA	5	-0.779755	-1.50733	0.026643	0.242888	1	3362	tags=60%, list=15%, signal=71%
SUZUKI_RESPONSE_TO_TSA_AND_DECITABINE_1A	19	-0.543459	-1.50492	0.0438312	0.246554	1	6144	tags=63%, list=28%, signal=88%
RASHI_RESPONSE_TO_IONIZING_RADIATION_5	122	-0.37773	-1.50478	0.00840336	0.2457	1	4862	tags=28%, list=22%, signal=36%
KARAKAS_TGFB1_SIGNALING	17	-0.556088	-1.5039	0.0373002	0.246158	1	3755	tags=41%, list=17%, signal=50%
PANGAS_TUMOR_SUPPRESSION_BY_SMAD1_AND_SMAD5_UP	103	-0.38257	-1.50278	0.00840336	0.247148	1	4523	tags=33%, list=21%, signal=41%
CAIRO_HEPATOBLASTOMA_CLASSES_DN	172	-0.358158	-1.50273	0.00132626	0.246059	1	6367	tags=40%, list=29%, signal=55%
ACEVEDO_LIVER_CANCER_WITH_H3K9ME3_UP	72	-0.405913	-1.50262	0.0211161	0.245092	1	3414	tags=29%, list=16%, signal=34%
RANKIN_ANGIOGENIC_TARGETS_OF_VHL_HIF2A_DN	7	-0.712469	-1.50222	0.0430108	0.244814	1	2343	tags=57%, list=11%, signal=64%
JI_CARCINOGENESIS_BY_KRAS_AND_STK11_DN	17	-0.549099	-1.502	0.045	0.24405	1	4990	tags=59%, list=23%, signal=76%
LINDVALL_IMMORTALIZED_BY_TERT_DN	65	-0.416594	-1.50053	0.0165414	0.245734	1	3164	tags=34%, list=14%, signal=39%
SENGUPTA_NASOPHARYNGEAL_CARCINOMA_DN	200	-0.349398	-1.50013	0	0.245519	1	2820	tags=24%, list=13%, signal=27%
ICHIBA_GRAFT_VERSUS_HOST_DISEASE_D7_UP	87	-0.393753	-1.49984	0.014771	0.244937	1	6209	tags=48%, list=28%, signal=67%
WESTON_VEGFA_TARGETS_3HR	66	-0.411001	-1.49979	0.0207407	0.243915	1	5855	tags=50%, list=27%, signal=68%
TORCHIA_TARGETS_OF_EWSR1_FLI1_FUSION_DN	261	-0.339673	-1.49914	0.00130039	0.244085	1	5362	tags=34%, list=24%, signal=45%
BOSCO_INTERFERON_INDUCED_ANTIVIRAL_MODULE	52	-0.431594	-1.499	0.0283019	0.243275	1	3147	tags=29%, list=14%, signal=34%
VERNOCHET_ADIPOGENESIS	18	-0.549454	-1.49886	0.0463259	0.242412	1	6354	tags=61%, list=29%, signal=86%
LU_TUMOR_ENDOTHELIAL_MARKERS_UP	16	-0.563005	-1.49821	0.0471204	0.242588	1	4552	tags=63%, list=21%, signal=79%
HUMMERICH_MALIGNANT_SKIN_TUMOR_DN	16	-0.567465	-1.49776	0.0571429	0.242338	1	3270	tags=44%, list=15%, signal=51%
WU_HBX_TARGETS_3_DN	13	-0.59282	-1.4973	0.0566372	0.242309	1	3544	tags=46%, list=16%, signal=55%
DOANE_BREAST_CANCER_ESR1_UP	93	-0.392397	-1.49309	0.0100865	0.24951	1	2756	tags=27%, list=13%, signal=31%
RAMALHO_STEMNESS_DN	63	-0.414373	-1.49271	0.0255255	0.249294	1	6011	tags=44%, list=27%, signal=61%
WILCOX_PRESPONSE_TO_ROGESTERONE_DN	49	-0.431462	-1.49168	0.0271132	0.250327	1	2808	tags=33%, list=13%, signal=37%
RAY_ALZHEIMERS_DISEASE	9	-0.647755	-1.49159	0.0482375	0.249393	1	6630	tags=78%, list=30%, signal=112%
HOWLIN_CITED1_TARGETS_1_DN	32	-0.473065	-1.48908	0.0314465	0.253337	1	4732	tags=34%, list=22%, signal=44%
WEST_ADRENOCORTICAL_TUMOR_DN	450	-0.322276	-1.48785	0	0.254563	1	3796	tags=25%, list=17%, signal=29%
MOSERLE_IFNA_RESPONSE	21	-0.520052	-1.48558	0.0450886	0.257775	1	4496	tags=48%, list=21%, signal=60%
LEE_LIVER_CANCER_CIPROFIBRATE_DN	56	-0.420791	-1.48514	0.0251108	0.25756	1	3548	tags=32%, list=16%, signal=38%
RAY_TUMORIGENESIS_BY_ERBB2_CDC25A_DN	131	-0.368746	-1.48435	0.00140056	0.258025	1	4263	tags=28%, list=19%, signal=35%
WANG_RESPONSE_TO_GSK3_INHIBITOR_SB216763_UP	232	-0.341912	-1.48169	0.0012837	0.262361	1	6213	tags=41%, list=28%, signal=56%
DACOSTA_UV_RESPONSE_VIA_ERCC3_XPCS_UP	23	-0.498567	-1.48137	0.046252	0.261958	1	3466	tags=30%, list=16%, signal=36%
DIAZ_CHRONIC_MEYLOGENOUS_LEUKEMIA_DN	94	-0.381165	-1.47938	0.00983146	0.264877	1	3349	tags=27%, list=15%, signal=31%
ALONSO_METASTASIS_EMT_UP	28	-0.484818	-1.47406	0.041876	0.274952	1	2596	tags=21%, list=12%, signal=24%
KUMAR_TARGETS_OF_MLL_AF9_FUSION	331	-0.330476	-1.47292	0.00250627	0.276202	1	5489	tags=32%, list=25%, signal=42%
GROSS_HYPOXIA_VIA_ELK3_ONLY_DN	40	-0.448666	-1.47223	0.0355487	0.276467	1	5405	tags=38%, list=25%, signal=50%
RIGGI_EWING_SARCOMA_PROGENITOR_UP	334	-0.330843	-1.4717	0.00120048	0.276388	1	4060	tags=27%, list=19%, signal=33%
BURTON_ADIPOGENESIS_PEAK_AT_0HR	54	-0.420126	-1.46999	0.0393701	0.278716	1	2964	tags=35%, list=14%, signal=41%
MOTAMED_RESPONSE_TO_ANDROGEN_UP	5	-0.761358	-1.46936	0.0476191	0.278843	1	4045	tags=80%, list=18%, signal=98%
CAIRO_HEPATOBLASTOMA_DN	213	-0.343337	-1.46781	0.00260756	0.280855	1	4697	tags=30%, list=21%, signal=37%
BERTUCCI_MEDULLARY_VS_DUCTAL_BREAST_CANCER_DN	126	-0.367859	-1.46752	0.0108992	0.280256	1	2333	tags=20%, list=11%, signal=22%
HSIAO_LIVER_SPECIFIC_GENES	201	-0.346085	-1.46638	0.00265604	0.281541	1	4990	tags=33%, list=23%, signal=43%
DAUER_STAT3_TARGETS_DN	36	-0.451549	-1.46637	0.0384615	0.280424	1	4827	tags=44%, list=22%, signal=57%
MIKKELSEN_ES_LCP_WITH_H3K4ME3	100	-0.379893	-1.46457	0.0156919	0.283056	1	5492	tags=43%, list=25%, signal=57%
COATES_MACROPHAGE_M1_VS_M2_UP	61	-0.415424	-1.46435	0.0249633	0.28243	1	6924	tags=52%, list=32%, signal=77%
YAO_TEMPORAL_RESPONSE_TO_PROGESTERONE_CLUSTER_12	71	-0.395451	-1.46129	0.0204678	0.287849	1	5344	tags=35%, list=24%, signal=46%
HERNANDEZ_MITOTIC_ARREST_BY_DOCETAXEL_1_UP	27	-0.48225	-1.46071	0.0630915	0.287903	1	2727	tags=30%, list=12%, signal=34%
WORSCHECH_TUMOR_REJECTION_UP	49	-0.41636	-1.46066	0.0314843	0.286867	1	3530	tags=35%, list=16%, signal=41%
ROSS_AML_WITH_CBFB_MYH11_FUSION	43	-0.431242	-1.45994	0.0271132	0.287307	1	4955	tags=47%, list=23%, signal=60%
GARGALOVIC_RESPONSE_TO_OXIDIZED_PHOSPHOLIPIDS_BLUE_DN	41	-0.437391	-1.45971	0.031405	0.286631	1	3190	tags=24%, list=15%, signal=28%
LINDGREN_BLADDER_CANCER_CLUSTER_2B	319	-0.326614	-1.45906	0.00365408	0.286917	1	5510	tags=35%, list=25%, signal=46%
SHIN_B_CELL_LYMPHOMA_CLUSTER_3	25	-0.491372	-1.45878	0.0416	0.28632	1	4189	tags=40%, list=19%, signal=49%
NADELLA_PRKAR1A_TARGETS_DN	7	-0.691412	-1.45843	0.0678899	0.286	1	404	tags=29%, list=2%, signal=29%
SERVITJA_LIVER_HNF1A_TARGETS_DN	139	-0.35808	-1.45657	0.00945946	0.288872	1	3549	tags=27%, list=16%, signal=32%
LIU_IL13_MEMORY_MODEL_UP	14	-0.567605	-1.4546	0.0535117	0.292086	1	5048	tags=43%, list=23%, signal=56%
SHIN_B_CELL_LYMPHOMA_CLUSTER_9	16	-0.548466	-1.45429	0.0601375	0.291573	1	3405	tags=44%, list=16%, signal=52%
LI_WILMS_TUMOR_VS_FETAL_KIDNEY_1_UP	159	-0.346542	-1.45421	0.00981767	0.290596	1	3766	tags=23%, list=17%, signal=28%
GERHOLD_ADIPOGENESIS_UP	46	-0.430885	-1.45286	0.0280374	0.292315	1	3167	tags=33%, list=14%, signal=38%
VALK_AML_WITH_EVI1	17	-0.535967	-1.45255	0.0558376	0.291878	1	4960	tags=53%, list=23%, signal=68%
AGARWAL_AKT_PATHWAY_TARGETS	8	-0.661747	-1.45118	0.0665529	0.293856	1	3748	tags=75%, list=17%, signal=90%
RODRIGUES_THYROID_CARCINOMA_ANAPLASTIC_DN	390	-0.320663	-1.45102	0	0.293033	1	4970	tags=27%, list=23%, signal=34%
MCCLUNG_CREB1_TARGETS_UP	86	-0.383231	-1.45075	0.015896	0.292541	1	2443	tags=21%, list=11%, signal=23%
SHIPP_DLBCL_VS_FOLLICULAR_LYMPHOMA_DN	37	-0.448612	-1.44909	0.0469484	0.295098	1	3329	tags=27%, list=15%, signal=32%
YAGUE_PRETUMOR_DRUG_RESISTANCE_DN	9	-0.638779	-1.44826	0.0659341	0.295883	1	1287	tags=33%, list=6%, signal=35%
KANG_AR_TARGETS_DN	17	-0.531798	-1.44777	0.0540541	0.29584	1	3544	tags=47%, list=16%, signal=56%
HUANG_GATA2_TARGETS_UP	121	-0.358131	-1.44526	0.0163043	0.300154	1	6878	tags=43%, list=31%, signal=62%
TONKS_TARGETS_OF_RUNX1_RUNX1T1_FUSION_ERYTHROCYTE_DN	11	-0.606328	-1.44508	0.0840065	0.299438	1	505	tags=27%, list=2%, signal=28%
AKL_HTLV1_INFECTION_DN	53	-0.408656	-1.44492	0.043609	0.29864	1	5128	tags=36%, list=23%, signal=47%
FURUKAWA_DUSP6_TARGETS_PCI35_UP	52	-0.416842	-1.44392	0.0382263	0.299755	1	3387	tags=33%, list=15%, signal=39%
KLEIN_TARGETS_OF_BCR_ABL1_FUSION	40	-0.444078	-1.44321	0.0515298	0.300121	1	5218	tags=48%, list=24%, signal=62%
HAHTOLA_MYCOSIS_FUNGOIDES_SKIN_UP	142	-0.353151	-1.44019	0.0107962	0.305461	1	6708	tags=37%, list=31%, signal=52%
SCHAEFFER_PROSTATE_DEVELOPMENT_48HR_DN	344	-0.320773	-1.4398	0	0.305216	1	3400	tags=24%, list=16%, signal=28%
SASAI_TARGETS_OF_CXCR6_AND_PTCH1_DN	8	-0.649373	-1.43852	0.0851789	0.307119	1	6205	tags=75%, list=28%, signal=105%
CROMER_TUMORIGENESIS_UP	50	-0.417558	-1.4385	0.0421217	0.30609	1	3863	tags=44%, list=18%, signal=53%
ALCALAY_AML_BY_NPM1_LOCALIZATION_UP	119	-0.360032	-1.43847	0.0181564	0.305065	1	4834	tags=33%, list=22%, signal=42%
KRASNOSELSKAYA_ILF3_TARGETS_DN	41	-0.427153	-1.43797	0.0393343	0.305135	1	2588	tags=20%, list=12%, signal=22%
STEGER_ADIPOGENESIS_UP	21	-0.495682	-1.4369	0.0675453	0.306446	1	2997	tags=33%, list=14%, signal=39%
FOSTER_KDM1A_TARGETS_UP	196	-0.338109	-1.436	0.00404858	0.307336	1	4187	tags=29%, list=19%, signal=35%
BARRIER_COLON_CANCER_RECURRENCE_UP	34	-0.455007	-1.43556	0.0458265	0.307302	1	2159	tags=21%, list=10%, signal=23%
SCHAEFFER_PROSTATE_DEVELOPMENT_AND_CANCER_BOX6_UP	8	-0.66566	-1.43498	0.0762712	0.307597	1	1439	tags=38%, list=7%, signal=40%
MANALO_HYPOXIA_UP	172	-0.341462	-1.43281	0.00666667	0.31132	1	3181	tags=22%, list=15%, signal=26%
KINSEY_TARGETS_OF_EWSR1_FLII_FUSION_DN	242	-0.327268	-1.43125	0.00787402	0.313834	1	4024	tags=26%, list=18%, signal=32%
SMID_BREAST_CANCER_RELAPSE_IN_BRAIN_DN	62	-0.396166	-1.43088	0.0324074	0.313541	1	6865	tags=56%, list=31%, signal=82%
BUCKANOVICH_T_LYMPHOCYTE_HOMING_ON_TUMOR_DN	18	-0.524101	-1.42876	0.0627063	0.317231	1	288	tags=17%, list=1%, signal=17%
GU_PDEF_TARGETS_UP	64	-0.395018	-1.42746	0.0406015	0.319182	1	3589	tags=33%, list=16%, signal=39%
FULCHER_INFLAMMATORY_RESPONSE_LECTIN_VS_LPS_DN	315	-0.318287	-1.42729	0.00246914	0.318475	1	6861	tags=42%, list=31%, signal=60%
BERENJENO_TRANSFORMED_BY_RHOA_REVERSIBLY_UP	8	-0.636155	-1.42593	0.101027	0.320513	1	6569	tags=75%, list=30%, signal=107%
NIELSEN_GIST_VS_SYNOVIAL_SARCOMA_UP	16	-0.538871	-1.4227	0.0694215	0.326917	1	1669	tags=38%, list=8%, signal=41%
ZHANG_RESPONSE_TO_IKK_INHIBITOR_AND_TNF_DN	68	-0.386735	-1.4216	0.0175182	0.328396	1	2218	tags=19%, list=10%, signal=21%
GAURNIER_PSMD4_TARGETS	46	-0.413616	-1.42061	0.0501567	0.329538	1	4990	tags=41%, list=23%, signal=53%
TAKEDA_TARGETS_OF_NUP98_HOXA9_FUSION_8D_DN	144	-0.347339	-1.4197	0.0150273	0.330661	1	5724	tags=35%, list=26%, signal=47%
URS_ADIPOCYTE_DIFFERENTIATION_UP	60	-0.398169	-1.4194	0.0340557	0.330265	1	6481	tags=50%, list=30%, signal=71%
TAKADA_GASTRIC_CANCER_COPY_NUMBER_DN	22	-0.489311	-1.41766	0.0797342	0.333442	1	3337	tags=45%, list=15%, signal=54%
ROETH_TERT_TARGETS_DN	6	-0.694125	-1.41748	0.0740741	0.332764	1	6468	tags=83%, list=30%, signal=118%
LINDGREN_BLADDER_CANCER_CLUSTER_1_UP	88	-0.372123	-1.41654	0.0323054	0.333926	1	6651	tags=39%, list=30%, signal=55%
HAN_JNK_SINGALING_UP	30	-0.460707	-1.41631	0.0641026	0.333365	1	4496	tags=33%, list=21%, signal=42%
RODRIGUES_THYROID_CARCINOMA_DN	52	-0.405934	-1.41558	0.0379939	0.33402	1	3213	tags=27%, list=15%, signal=31%
LIU_IL13_MEMORY_MODEL_DN	5	-0.7371	-1.41525	0.095064	0.333642	1	5289	tags=80%, list=24%, signal=105%
LEE_INTRATHYMIC_T_PROGENITOR	18	-0.506887	-1.41491	0.0766551	0.333391	1	3707	tags=39%, list=17%, signal=47%
WENG_POR_DOSAGE	16	-0.528547	-1.41387	0.0766667	0.334612	1	3114	tags=38%, list=14%, signal=44%
REN_ALVEOLAR_RHABDOMYOSARCOMA_UP	88	-0.369665	-1.41376	0.0341753	0.333735	1	1285	tags=17%, list=6%, signal=18%
KUROZUMI_RESPONSE_TO_ONCOCYTIC_VIRUS	41	-0.430733	-1.41341	0.0599078	0.333442	1	4846	tags=41%, list=22%, signal=53%
MONTERO_THYROID_CANCER_POOR_SURVIVAL_DN	8	-0.641819	-1.41058	0.0844828	0.339115	1	6075	tags=63%, list=28%, signal=86%
BOYAULT_LIVER_CANCER_SUBCLASS_G6_UP	55	-0.401259	-1.40874	0.0345369	0.342278	1	1557	tags=18%, list=7%, signal=20%
LU_TUMOR_VASCULATURE_DN	12	-0.561225	-1.40788	0.100176	0.343171	1	2943	tags=50%, list=13%, signal=58%
BOYAULT_LIVER_CANCER_SUBCLASS_G23_DN	8	-0.633546	-1.40775	0.0886076	0.342391	1	1858	tags=38%, list=8%, signal=41%
GUTIERREZ_CHRONIC_LYMPHOCYTIC_LEUKEMIA_DN	45	-0.417154	-1.40708	0.0535168	0.343011	1	3096	tags=20%, list=14%, signal=23%
HOLLEMAN_PREDNISOLONE_RESISTANCE_B_ALL_DN	8	-0.631927	-1.40661	0.0949721	0.343078	1	693	tags=25%, list=3%, signal=26%
WANG_METASTASIS_OF_BREAST_CANCER	10	-0.604745	-1.40508	0.0857633	0.345919	1	1580	tags=30%, list=7%, signal=32%
HUI_MAPK14_TARGETS_UP	18	-0.509048	-1.40312	0.079602	0.349613	1	3051	tags=39%, list=14%, signal=45%
MCGARVEY_SILENCED_BY_METHYLATION_IN_COLON_CANCER	39	-0.415591	-1.4027	0.0597738	0.349521	1	2679	tags=28%, list=12%, signal=32%
ZHANG_TARGETS_OF_EWSR1_FLI1_FUSION	73	-0.381539	-1.4023	0.0493274	0.349418	1	2935	tags=19%, list=13%, signal=22%
BOWIE_RESPONSE_TO_TAMOXIFEN	13	-0.560985	-1.40224	0.0926244	0.348504	1	6209	tags=85%, list=28%, signal=118%
OUILLETTE_CLL_13Q14_DELETION_DN	45	-0.41487	-1.39955	0.0643185	0.353943	1	3830	tags=27%, list=17%, signal=32%
MAGRANGEAS_MULTIPLE_MYELOMA_IGG_VS_IGA_DN	23	-0.473833	-1.39913	0.0888158	0.35383	1	2737	tags=26%, list=13%, signal=30%
WONG_ENDMETRIUM_CANCER_UP	18	-0.500907	-1.39907	0.0840336	0.352877	1	5923	tags=61%, list=27%, signal=84%
WONG_ADULT_TISSUE_STEM_MODULE	627	-0.297003	-1.39845	0	0.353346	1	4189	tags=23%, list=19%, signal=28%
MAINA_VHL_TARGETS_UP	8	-0.640453	-1.39685	0.0909091	0.356057	1	6954	tags=75%, list=32%, signal=110%
BOQUEST_STEM_CELL_CULTURED_VS_FRESH_DN	26	-0.46612	-1.39647	0.0862069	0.355859	1	3531	tags=38%, list=16%, signal=46%
DER_IFN_ALPHA_RESPONSE_UP	60	-0.389743	-1.39634	0.0503704	0.355081	1	3667	tags=27%, list=17%, signal=32%
DOANE_BREAST_CANCER_CLASSES_UP	52	-0.401377	-1.39611	0.0504732	0.354609	1	6015	tags=54%, list=27%, signal=74%
IIZUKA_LIVER_CANCER_PROGRESSION_G2_G3_UP	23	-0.482525	-1.39584	0.0765217	0.354261	1	8492	tags=61%, list=39%, signal=99%
CHIANG_LIVER_CANCER_SUBCLASS_INTERFERON_DN	37	-0.430561	-1.39526	0.0857988	0.354561	1	2952	tags=30%, list=13%, signal=34%
KENNY_CTNNB1_TARGETS_DN	38	-0.434616	-1.39465	0.0654362	0.355136	1	7260	tags=55%, list=33%, signal=83%
STAEGE_EWING_FAMILY_TUMOR	27	-0.456987	-1.39372	0.0704225	0.356284	1	3496	tags=26%, list=16%, signal=31%
XU_HGF_SIGNALING_NOT_VIA_AKT1_48HR_DN	16	-0.526465	-1.39293	0.0775578	0.357259	1	2727	tags=31%, list=12%, signal=36%
TAKEDA_TARGETS_OF_NUP98_HOXA9_FUSION_10D_UP	134	-0.340015	-1.39221	0.0228802	0.357896	1	4827	tags=32%, list=22%, signal=41%
HAN_JNK_SINGALING_DN	36	-0.432729	-1.39218	0.0669856	0.356899	1	4853	tags=44%, list=22%, signal=57%
ZHAN_MULTIPLE_MYELOMA_HP_UP	35	-0.43078	-1.3915	0.0629921	0.357537	1	4407	tags=29%, list=20%, signal=36%
PILON_KLF1_TARGETS_UP	403	-0.30345	-1.38949	0.00235294	0.361405	1	2967	tags=19%, list=14%, signal=22%
RAO_BOUND_BY_SALL4_ISOFORM_A	130	-0.342297	-1.38884	0.0375	0.361866	1	3739	tags=24%, list=17%, signal=29%
ALTEMEIER_RESPONSE_TO_LPS_WITH_MECHANICAL_VENTILATION	107	-0.353392	-1.38848	0.0314208	0.36166	1	4827	tags=34%, list=22%, signal=43%
VANTVEER_BREAST_CANCER_BRCA1_DN	29	-0.44624	-1.38803	0.0775444	0.361652	1	2964	tags=24%, list=14%, signal=28%
MARTORIATI_MDM4_TARGETS_NEUROEPITHELIUM_DN	134	-0.341435	-1.38802	0.0246914	0.360639	1	4186	tags=32%, list=19%, signal=39%
GUO_HEX_TARGETS_UP	69	-0.376591	-1.38761	0.0427099	0.360635	1	6230	tags=33%, list=28%, signal=46%
DELASERNA_MYOD_TARGETS_DN	50	-0.405105	-1.38692	0.0610933	0.361288	1	2645	tags=24%, list=12%, signal=27%
TSENG_IRS1_TARGETS_DN	110	-0.354874	-1.38688	0.0310734	0.36033	1	5242	tags=36%, list=24%, signal=48%
ONO_FOXP3_TARGETS_UP	23	-0.474821	-1.38654	0.0825243	0.360119	1	4820	tags=39%, list=22%, signal=50%
LE_SKI_TARGETS_DN	8	-0.615443	-1.38582	0.118761	0.360824	1	2679	tags=38%, list=12%, signal=43%
WANG_ESOPHAGUS_CANCER_VS_NORMAL_UP	105	-0.348388	-1.38498	0.0290456	0.361796	1	2961	tags=22%, list=14%, signal=25%
MURAKAMI_UV_RESPONSE_1HR_DN	7	-0.667244	-1.3847	0.0775862	0.36148	1	2397	tags=43%, list=11%, signal=48%
LABBE_TGFB1_TARGETS_UP	89	-0.357903	-1.3843	0.0391872	0.361407	1	1077	tags=15%, list=5%, signal=15%
PASQUALUCCI_LYMPHOMA_BY_GC_STAGE_DN	139	-0.336489	-1.38392	0.0178326	0.361322	1	6352	tags=38%, list=29%, signal=53%
MOROSETTI_FACIOSCAPULOHUMERAL_MUSCULAR_DISTROPHY_UP	19	-0.502397	-1.38386	0.0809443	0.36046	1	4970	tags=53%, list=23%, signal=68%
ZHANG_INTERFERON_RESPONSE	17	-0.521511	-1.38384	0.112745	0.359463	1	3882	tags=41%, list=18%, signal=50%
GAUSSMANN_MLL_AF4_FUSION_TARGETS_F_UP	150	-0.336048	-1.38372	0.0254692	0.358709	1	3417	tags=27%, list=16%, signal=31%
MARSON_FOXP3_TARGETS_DN	43	-0.416051	-1.3829	0.0576324	0.359666	1	3789	tags=28%, list=17%, signal=34%
CUI_TCF21_TARGETS_2_DN	656	-0.292799	-1.38102	0	0.363236	1	6164	tags=33%, list=28%, signal=45%
CHIARADONNA_NEOPLASTIC_TRANSFORMATION_KRAS_DN	130	-0.34091	-1.38095	0.0182584	0.362356	1	3789	tags=29%, list=17%, signal=35%
NING_CHRONIC_OBSTRUCTIVE_PULMONARY_DISEASE_UP	134	-0.341899	-1.38055	0.0183357	0.362241	1	4522	tags=23%, list=21%, signal=29%
ACEVEDO_FGFR1_TARGETS_IN_PROSTATE_CANCER_MODEL_DN	260	-0.31518	-1.38053	0.00879397	0.36125	1	2789	tags=22%, list=13%, signal=25%
LEIN_ASTROCYTE_MARKERS	36	-0.429303	-1.37931	0.0606532	0.363218	1	2625	tags=25%, list=12%, signal=28%
GRADE_COLON_VS_RECTAL_CANCER_DN	42	-0.410336	-1.37922	0.0576324	0.362445	1	6996	tags=45%, list=32%, signal=66%
KOBAYASHI_EGFR_SIGNALING_24HR_UP	72	-0.372753	-1.37877	0.0339233	0.362632	1	5900	tags=39%, list=27%, signal=53%
MAHADEVAN_IMATINIB_RESISTANCE_DN	18	-0.513067	-1.37854	0.095315	0.362143	1	5845	tags=67%, list=27%, signal=91%
BEIER_GLIOMA_STEM_CELL_UP	29	-0.448781	-1.37621	0.0900322	0.366908	1	5783	tags=45%, list=26%, signal=61%
OZANNE_AP1_TARGETS_UP	14	-0.529861	-1.37549	0.110379	0.367675	1	1517	tags=29%, list=7%, signal=31%
APPEL_IMATINIB_RESPONSE	30	-0.444041	-1.37473	0.0772871	0.368596	1	7017	tags=47%, list=32%, signal=69%
ZHU_CMV_8_HR_UP	40	-0.416018	-1.37455	0.0954693	0.368039	1	3107	tags=25%, list=14%, signal=29%
ICHIBA_GRAFT_VERSUS_HOST_DISEASE_35D_UP	114	-0.343283	-1.37397	0.0268741	0.368445	1	5925	tags=39%, list=27%, signal=54%
HELLER_HDAC_TARGETS_UP	233	-0.316917	-1.37342	0.017744	0.368744	1	4271	tags=27%, list=20%, signal=33%
MIKKELSEN_MCV6_LCP_WITH_H3K4ME3	125	-0.33859	-1.37284	0.0334728	0.369168	1	4763	tags=37%, list=22%, signal=47%
SMID_BREAST_CANCER_RELAPSE_IN_BONE_UP	75	-0.368605	-1.37183	0.0466761	0.370793	1	3531	tags=31%, list=16%, signal=36%
CERIBELLI_PROMOTERS_INACTIVE_AND_BOUND_BY_NFY	23	-0.478321	-1.37122	0.0948553	0.37132	1	2008	tags=26%, list=9%, signal=29%
FINAK_BREAST_CANCER_SDPP_SIGNATURE	23	-0.465219	-1.36998	0.0978441	0.373504	1	4151	tags=48%, list=19%, signal=59%
KRISHNAN_FURIN_TARGETS_DN	7	-0.645403	-1.36996	0.111712	0.372538	1	7768	tags=100%, list=35%, signal=155%
RIZKI_TUMOR_INVASIVENESS_3D_DN	223	-0.317919	-1.36843	0.0167095	0.375395	1	4667	tags=26%, list=21%, signal=33%
KIM_MYCN_AMPLIFICATION_TARGETS_DN	74	-0.360807	-1.36629	0.0533537	0.379676	1	5948	tags=45%, list=27%, signal=61%
DORSEY_GAB2_TARGETS	25	-0.45617	-1.36578	0.0914928	0.37992	1	2679	tags=28%, list=12%, signal=32%
VERRECCHIA_EARLY_RESPONSE_TO_TGFB1	54	-0.392689	-1.36558	0.0591806	0.379401	1	1734	tags=20%, list=8%, signal=22%
BURTON_ADIPOGENESIS_6	165	-0.325667	-1.36546	0.0162162	0.378693	1	4674	tags=26%, list=21%, signal=33%
HOWLIN_PUBERTAL_MAMMARY_GLAND	61	-0.379563	-1.3651	0.062591	0.378567	1	4007	tags=38%, list=18%, signal=46%
RODWELL_AGING_KIDNEY_DN	103	-0.347093	-1.36508	0.037518	0.377606	1	5677	tags=32%, list=26%, signal=43%
CLIMENT_BREAST_CANCER_COPY_NUMBER_DN	8	-0.61746	-1.36507	0.0987868	0.376676	1	5053	tags=50%, list=23%, signal=65%
HOFFMAN_CLOCK_TARGETS_UP	8	-0.621168	-1.36463	0.116838	0.376695	1	1805	tags=38%, list=8%, signal=41%
FARMER_BREAST_CANCER_CLUSTER_7	17	-0.503939	-1.36451	0.101027	0.376006	1	5502	tags=47%, list=25%, signal=63%
IIZUKA_LIVER_CANCER_PROGRESSION_L1_G1_UP	18	-0.486349	-1.36254	0.097973	0.379731	1	4750	tags=44%, list=22%, signal=57%
YEGNASUBRAMANIAN_PROSTATE_CANCER	90	-0.351339	-1.36235	0.0435393	0.37925	1	3723	tags=28%, list=17%, signal=33%
HORIUCHI_WTAP_TARGETS_UP	229	-0.314992	-1.36159	0.0131406	0.380156	1	4804	tags=28%, list=22%, signal=36%
GUILLAUMOND_KLF10_TARGETS_DN	24	-0.460966	-1.36125	0.100486	0.380006	1	3690	tags=29%, list=17%, signal=35%
MCCLUNG_COCAINE_REWARD_5D	70	-0.364814	-1.3608	0.0480481	0.380116	1	4450	tags=27%, list=20%, signal=34%
CHICAS_RB1_TARGETS_CONFLUENT	445	-0.294651	-1.3608	0.00456621	0.379134	1	4550	tags=27%, list=21%, signal=33%
WESTON_VEGFA_TARGETS_6HR	56	-0.388547	-1.36077	0.0630915	0.378226	1	6440	tags=57%, list=29%, signal=81%
RUAN_RESPONSE_TO_TNF_DN	80	-0.366537	-1.36072	0.0429448	0.377384	1	3925	tags=25%, list=18%, signal=30%
YAO_TEMPORAL_RESPONSE_TO_PROGESTERONE_CLUSTER_0	64	-0.377603	-1.36052	0.0732824	0.376958	1	6215	tags=42%, list=28%, signal=59%
HAHTOLA_MYCOSIS_FUNGOIDES_UP	12	-0.558243	-1.35979	0.100334	0.377889	1	3748	tags=42%, list=17%, signal=50%
ZHU_CMV_24_HR_DN	81	-0.36191	-1.35939	0.0481203	0.377909	1	4048	tags=31%, list=18%, signal=38%
IGLESIAS_E2F_TARGETS_UP	139	-0.336924	-1.35898	0.0319149	0.377919	1	4522	tags=26%, list=21%, signal=32%
DOANE_RESPONSE_TO_ANDROGEN_DN	198	-0.320487	-1.35878	0.0185676	0.37744	1	4902	tags=28%, list=22%, signal=36%
TERAMOTO_OPN_TARGETS_CLUSTER_6	23	-0.457259	-1.35874	0.0933977	0.376584	1	5016	tags=43%, list=23%, signal=56%
ZHAN_LATE_DIFFERENTIATION_GENES_UP	30	-0.429659	-1.35481	0.0889262	0.385384	1	6891	tags=53%, list=31%, signal=78%
KIM_BIPOLAR_DISORDER_OLIGODENDROCYTE_DENSITY_CORR_DN	72	-0.365188	-1.35449	0.0565217	0.385184	1	3988	tags=29%, list=18%, signal=36%
ZHU_CMV_ALL_DN	113	-0.340905	-1.35383	0.0330124	0.385872	1	4048	tags=27%, list=18%, signal=33%
MCCLUNG_CREB1_TARGETS_DN	47	-0.392276	-1.3536	0.0810398	0.385386	1	3400	tags=28%, list=16%, signal=33%
GENTLES_LEUKEMIC_STEM_CELL_DN	11	-0.552816	-1.35323	0.126095	0.385439	1	1522	tags=36%, list=7%, signal=39%
SMITH_LIVER_CANCER	38	-0.410659	-1.35254	0.0810811	0.386187	1	5732	tags=39%, list=26%, signal=53%
SUMI_HNF4A_TARGETS	25	-0.457439	-1.35184	0.10828	0.387009	1	2819	tags=36%, list=13%, signal=41%
WOTTON_RUNX_TARGETS_DN	28	-0.437246	-1.35127	0.0968801	0.387508	1	4003	tags=36%, list=18%, signal=44%
SUZUKI_RESPONSE_TO_TSA_AND_DECITABINE_1B	17	-0.489647	-1.35089	0.117444	0.387439	1	2045	tags=29%, list=9%, signal=32%
ONDER_CDH1_SIGNALING_VIA_CTNNB1	67	-0.36637	-1.35079	0.0640244	0.386771	1	5241	tags=36%, list=24%, signal=47%
LIU_LIVER_CANCER	26	-0.4488	-1.35003	0.113208	0.387738	1	3487	tags=35%, list=16%, signal=41%
VERRECCHIA_RESPONSE_TO_TGFB1_C2	23	-0.466842	-1.34944	0.120339	0.388347	1	3227	tags=39%, list=15%, signal=46%
FIGUEROA_AML_METHYLATION_CLUSTER_2_DN	5	-0.697696	-1.34783	0.140684	0.391373	1	4707	tags=80%, list=22%, signal=102%
BOYLAN_MULTIPLE_MYELOMA_PCA3_DN	54	-0.38583	-1.34767	0.070122	0.390811	1	5243	tags=28%, list=24%, signal=36%
FERREIRA_EWINGS_SARCOMA_UNSTABLE_VS_STABLE_DN	77	-0.360134	-1.34736	0.056213	0.390623	1	6215	tags=40%, list=28%, signal=56%
CHIANG_LIVER_CANCER_SUBCLASS_INTERFERON_UP	20	-0.479741	-1.34565	0.118056	0.394025	1	1775	tags=35%, list=8%, signal=38%
RUTELLA_RESPONSE_TO_CSF2RB_AND_IL4_DN	241	-0.308692	-1.34512	0.023407	0.394515	1	5874	tags=33%, list=27%, signal=45%
COLIN_PILOCYTIC_ASTROCYTOMA_VS_GLIOBLASTOMA_DN	24	-0.45346	-1.34309	0.11405	0.398601	1	2645	tags=29%, list=12%, signal=33%
COLINA_TARGETS_OF_4EBP1_AND_4EBP2	323	-0.30021	-1.34286	0.00488998	0.398217	1	4656	tags=27%, list=21%, signal=34%
MCLACHLAN_DENTAL_CARIES_UP	184	-0.31657	-1.34272	0.0245232	0.397557	1	5104	tags=37%, list=23%, signal=48%
KASLER_HDAC7_TARGETS_2_UP	5	-0.690415	-1.34018	0.135	0.402978	1	4388	tags=60%, list=20%, signal=75%
VALK_AML_CLUSTER_11	33	-0.425377	-1.34	0.0836013	0.40252	1	6133	tags=45%, list=28%, signal=63%
BILANGES_SERUM_SENSITIVE_GENES	74	-0.360575	-1.33995	0.0702541	0.401658	1	6182	tags=41%, list=28%, signal=56%
VALK_AML_CLUSTER_3	29	-0.430828	-1.33981	0.0938511	0.401068	1	5507	tags=34%, list=25%, signal=46%
LINDGREN_BLADDER_CANCER_HIGH_RECURRENCE	40	-0.399456	-1.33961	0.0851735	0.400634	1	1714	tags=20%, list=8%, signal=22%
XU_AKT1_TARGETS_48HR	7	-0.636714	-1.33843	0.115809	0.402587	1	3492	tags=43%, list=16%, signal=51%
BOYAULT_LIVER_CANCER_SUBCLASS_G12_DN	11	-0.549054	-1.33823	0.13369	0.402187	1	3695	tags=36%, list=17%, signal=44%
TAKEDA_TARGETS_OF_NUP98_HOXA9_FUSION_6HR_UP	65	-0.369733	-1.33785	0.0721649	0.402244	1	4960	tags=40%, list=23%, signal=52%
WOO_LIVER_CANCER_RECURRENCE_UP	93	-0.349805	-1.33626	0.0617816	0.405418	1	2471	tags=19%, list=11%, signal=22%
SANCHEZ_MDM2_TARGETS	10	-0.584666	-1.33491	0.135957	0.407928	1	3099	tags=40%, list=14%, signal=47%
SARTIPY_NORMAL_AT_INSULIN_RESISTANCE_DN	15	-0.503671	-1.33479	0.127148	0.407303	1	6637	tags=47%, list=30%, signal=67%
SMID_BREAST_CANCER_LUMINAL_B_DN	426	-0.290761	-1.33471	0.00578704	0.40655	1	4374	tags=29%, list=20%, signal=36%
XU_GH1_EXOGENOUS_TARGETS_DN	83	-0.354097	-1.33447	0.0482456	0.406289	1	5376	tags=40%, list=25%, signal=53%
POOLA_INVASIVE_BREAST_CANCER_DN	111	-0.337288	-1.33445	0.0495049	0.405397	1	5443	tags=37%, list=25%, signal=49%
KESHELAVA_MULTIPLE_DRUG_RESISTANCE	62	-0.368937	-1.33435	0.0574887	0.404689	1	4352	tags=29%, list=20%, signal=36%
SCHAEFFER_SOX9_TARGETS_IN_PROSTATE_DEVELOPMENT_DN	41	-0.401476	-1.33393	0.0839695	0.404817	1	3346	tags=22%, list=15%, signal=26%
VERHAAK_AML_WITH_NPM1_MUTATED_UP	143	-0.31846	-1.3337	0.0402778	0.404452	1	4558	tags=29%, list=21%, signal=36%
PASTURAL_RIZ1_TARGETS_UP	6	-0.657313	-1.33347	0.117958	0.404098	1	3124	tags=50%, list=14%, signal=58%
KATSANOU_ELAVL1_TARGETS_UP	140	-0.322448	-1.33317	0.0480769	0.404037	1	4595	tags=34%, list=21%, signal=43%
LEE_LIVER_CANCER_CIPROFIBRATE_UP	53	-0.378477	-1.33243	0.0940439	0.404974	1	3900	tags=23%, list=18%, signal=27%
TONKS_TARGETS_OF_RUNX1_RUNX1T1_FUSION_GRANULOCYTE_UP	45	-0.388401	-1.33239	0.0943396	0.404142	1	2704	tags=22%, list=12%, signal=25%
MCBRYAN_PUBERTAL_BREAST_6_7WK_DN	66	-0.364035	-1.33222	0.0646617	0.403614	1	4424	tags=27%, list=20%, signal=34%
FOURNIER_ACINAR_DEVELOPMENT_LATE_DN	18	-0.480984	-1.33207	0.142857	0.403105	1	473	tags=11%, list=2%, signal=11%
GARGALOVIC_RESPONSE_TO_OXIDIZED_PHOSPHOLIPIDS_LIGHTYELLOW_DN	7	-0.620273	-1.33113	0.157143	0.404496	1	6625	tags=71%, list=30%, signal=102%
HOSHIDA_LIVER_CANCER_SUBCLASS_S1	209	-0.310824	-1.33089	0.0258732	0.404116	1	6246	tags=37%, list=29%, signal=51%
WANG_CLASSIC_ADIPOGENIC_TARGETS_OF_PPARG	25	-0.449805	-1.33083	0.11252	0.403362	1	5352	tags=44%, list=24%, signal=58%
NOJIMA_SFRP2_TARGETS_DN	24	-0.442667	-1.33019	0.12275	0.404054	1	2935	tags=25%, list=13%, signal=29%
NELSON_RESPONSE_TO_ANDROGEN_UP	76	-0.356232	-1.33009	0.0650529	0.403411	1	2556	tags=18%, list=12%, signal=21%
FIGUEROA_AML_METHYLATION_CLUSTER_5_DN	36	-0.417485	-1.32951	0.0866873	0.404016	1	3227	tags=25%, list=15%, signal=29%
YANG_BREAST_CANCER_ESR1_UP	29	-0.432869	-1.32853	0.106349	0.405416	1	2636	tags=31%, list=12%, signal=35%
LOPEZ_EPITHELIOID_MESOTHELIOMA	15	-0.507202	-1.32579	0.124352	0.411652	1	259	tags=13%, list=1%, signal=13%
KAYO_CALORIE_RESTRICTION_MUSCLE_UP	80	-0.355886	-1.32544	0.0530086	0.411583	1	3030	tags=24%, list=14%, signal=27%
BASSO_HAIRY_CELL_LEUKEMIA_DN	70	-0.359033	-1.32526	0.0668693	0.411147	1	4502	tags=27%, list=21%, signal=34%
SOTIRIOU_BREAST_CANCER_GRADE_1_VS_3_DN	39	-0.407415	-1.32521	0.095935	0.410359	1	8084	tags=49%, list=37%, signal=77%
ZHENG_BOUND_BY_FOXP3	378	-0.292812	-1.32472	0.00821596	0.410694	1	3756	tags=21%, list=17%, signal=25%
MORI_MATURE_B_LYMPHOCYTE_UP	69	-0.359453	-1.32472	0.0876672	0.409786	1	5438	tags=36%, list=25%, signal=48%
HESS_TARGETS_OF_HOXA9_AND_MEIS1_DN	68	-0.364121	-1.32442	0.0712209	0.40957	1	5513	tags=34%, list=25%, signal=45%
HELLER_SILENCED_BY_METHYLATION_UP	210	-0.30797	-1.32401	0.0325945	0.409745	1	5881	tags=38%, list=27%, signal=51%
RICKMAN_HEAD_AND_NECK_CANCER_D	20	-0.460554	-1.32266	0.127768	0.412344	1	2488	tags=25%, list=11%, signal=28%
WILLERT_WNT_SIGNALING	20	-0.468592	-1.32236	0.130293	0.412189	1	2371	tags=20%, list=11%, signal=22%
ZHAN_MULTIPLE_MYELOMA_MS_UP	34	-0.413209	-1.32206	0.102484	0.412069	1	2804	tags=21%, list=13%, signal=24%
PEDRIOLI_MIR31_TARGETS_DN	292	-0.296799	-1.32113	0.0168472	0.413429	1	2679	tags=18%, list=12%, signal=21%
ZHENG_GLIOBLASTOMA_PLASTICITY_UP	213	-0.306992	-1.32096	0.0371846	0.412966	1	3755	tags=21%, list=17%, signal=25%
JIANG_HYPOXIA_CANCER	66	-0.362977	-1.32092	0.0707692	0.412163	1	5256	tags=27%, list=24%, signal=36%
NIELSEN_GIST_AND_SYNOVIAL_SARCOMA_DN	19	-0.480496	-1.3204	0.129693	0.412585	1	4990	tags=53%, list=23%, signal=68%
GROSS_ELK3_TARGETS_DN	28	-0.423725	-1.31995	0.127063	0.412851	1	2644	tags=21%, list=12%, signal=24%
FLECHNER_BIOPSY_KIDNEY_TRANSPLANT_REJECTED_VS_OK_DN	457	-0.286559	-1.31993	0.00596659	0.411989	1	5624	tags=27%, list=26%, signal=36%
OHGUCHI_LIVER_HNF4A_TARGETS_DN	118	-0.330597	-1.31935	0.0699589	0.412685	1	2717	tags=21%, list=12%, signal=24%
CASTELLANO_NRAS_TARGETS_UP	59	-0.363877	-1.31932	0.0778443	0.411864	1	6440	tags=44%, list=29%, signal=62%
NIELSEN_MALIGNAT_FIBROUS_HISTIOCYTOMA_DN	15	-0.485069	-1.31677	0.140264	0.417515	1	7381	tags=53%, list=34%, signal=80%
LIM_MAMMARY_STEM_CELL_DN	344	-0.293193	-1.31452	0.0107656	0.422348	1	6253	tags=34%, list=29%, signal=47%
GARGALOVIC_RESPONSE_TO_OXIDIZED_PHOSPHOLIPIDS_GREY_DN	46	-0.386193	-1.31432	0.0917574	0.421932	1	6209	tags=46%, list=28%, signal=64%
BYSTRYKH_HEMATOPOIESIS_STEM_CELL_IL3RA	8	-0.58791	-1.31412	0.176786	0.421557	1	4940	tags=50%, list=23%, signal=65%
NOUZOVA_METHYLATED_IN_APL	43	-0.39131	-1.31411	0.106624	0.42069	1	2616	tags=21%, list=12%, signal=24%
MIKKELSEN_MCV6_HCP_WITH_H3K27ME3	338	-0.29406	-1.31349	0.0143198	0.421419	1	3150	tags=23%, list=14%, signal=27%
LEE_LIVER_CANCER_E2F1_UP	53	-0.375591	-1.31339	0.09375	0.420741	1	4496	tags=32%, list=21%, signal=40%
HOWLIN_CITED1_TARGETS_2_DN	15	-0.501701	-1.31271	0.161551	0.421569	1	2586	tags=27%, list=12%, signal=30%
INGRAM_SHH_TARGETS_DN	50	-0.383352	-1.31259	0.0911854	0.42094	1	2666	tags=18%, list=12%, signal=20%
KEEN_RESPONSE_TO_ROSIGLITAZONE_DN	94	-0.341602	-1.31237	0.0633094	0.42063	1	3748	tags=26%, list=17%, signal=31%
GOZGIT_ESR1_TARGETS_DN	542	-0.282564	-1.31218	0.00447928	0.420216	1	5537	tags=31%, list=25%, signal=41%
HOQUE_METHYLATED_IN_CANCER	51	-0.381012	-1.31151	0.10061	0.421078	1	6144	tags=39%, list=28%, signal=54%
LEE_LIVER_CANCER_ACOX1_UP	53	-0.369583	-1.31037	0.117932	0.422988	1	4187	tags=25%, list=19%, signal=30%
LEE_LIVER_CANCER_MYC_E2F1_UP	48	-0.377149	-1.31012	0.102484	0.422719	1	4496	tags=33%, list=21%, signal=42%
ONGUSAHA_TP53_TARGETS	36	-0.408535	-1.30981	0.126623	0.422681	1	1908	tags=17%, list=9%, signal=18%
CHAN_INTERFERON_PRODUCING_DENDRITIC_CELL	12	-0.53145	-1.30975	0.166667	0.421949	1	5489	tags=58%, list=25%, signal=78%
BOHN_PRIMARY_IMMUNODEFICIENCY_SYNDROM_DN	36	-0.404072	-1.3091	0.106583	0.422793	1	7559	tags=58%, list=35%, signal=89%
BACOLOD_RESISTANCE_TO_ALKYLATING_AGENTS_UP	21	-0.457671	-1.30906	0.119672	0.422	1	4661	tags=43%, list=21%, signal=54%
RASHI_RESPONSE_TO_IONIZING_RADIATION_6	70	-0.355346	-1.30899	0.0840841	0.421325	1	5104	tags=30%, list=23%, signal=39%
YAO_TEMPORAL_RESPONSE_TO_PROGESTERONE_CLUSTER_16	70	-0.351959	-1.30786	0.0799397	0.423316	1	5439	tags=41%, list=25%, signal=55%
GAUSSMANN_MLL_AF4_FUSION_TARGETS_B_UP	22	-0.453494	-1.30701	0.135537	0.424652	1	4001	tags=41%, list=18%, signal=50%
DER_IFN_BETA_RESPONSE_UP	83	-0.342876	-1.30598	0.0862573	0.426433	1	3667	tags=22%, list=17%, signal=26%
MURAKAMI_UV_RESPONSE_6HR_DN	16	-0.498296	-1.30584	0.131488	0.425908	1	5285	tags=44%, list=24%, signal=58%
PLASARI_NFIC_TARGETS_BASAL_DN	17	-0.47747	-1.30438	0.149832	0.428843	1	3835	tags=41%, list=18%, signal=50%
ALCALA_APOPTOSIS	73	-0.348313	-1.30303	0.0900763	0.431389	1	4550	tags=23%, list=21%, signal=29%
ZEMBUTSU_SENSITIVITY_TO_DOXORUBICIN	14	-0.50141	-1.30253	0.160684	0.43178	1	3661	tags=36%, list=17%, signal=43%
RODWELL_AGING_KIDNEY_NO_BLOOD_UP	170	-0.312617	-1.30209	0.0481283	0.432066	1	3524	tags=24%, list=16%, signal=28%
NIELSEN_GIST	75	-0.348467	-1.30206	0.0936107	0.431264	1	2320	tags=16%, list=11%, signal=18%
RICKMAN_TUMOR_DIFFERENTIATED_MODERATELY_VS_POORLY_UP	93	-0.343181	-1.3015	0.0672515	0.431862	1	4561	tags=27%, list=21%, signal=34%
MURAKAMI_UV_RESPONSE_24HR	15	-0.49813	-1.30017	0.145105	0.434423	1	3544	tags=33%, list=16%, signal=40%
WANG_PROSTATE_CANCER_ANDROGEN_INDEPENDENT	50	-0.380619	-1.3	0.104851	0.434048	1	2741	tags=26%, list=13%, signal=30%
NIELSEN_LEIOMYOSARCOMA_CNN1_UP	17	-0.470561	-1.29979	0.147458	0.433722	1	5241	tags=47%, list=24%, signal=62%
GOLDRATH_IMMUNE_MEMORY	56	-0.372364	-1.29919	0.100295	0.434491	1	6453	tags=43%, list=29%, signal=61%
LEE_LIVER_CANCER_SURVIVAL_UP	135	-0.317123	-1.29827	0.0563187	0.435931	1	5350	tags=33%, list=24%, signal=44%
HOLLEMAN_ASPARAGINASE_RESISTANCE_B_ALL_UP	20	-0.457355	-1.29674	0.143106	0.439069	1	4923	tags=25%, list=22%, signal=32%
WINNEPENNINCKX_MELANOMA_METASTASIS_DN	31	-0.411409	-1.29666	0.123177	0.438411	1	4189	tags=26%, list=19%, signal=32%
KAMMINGA_SENESCENCE	32	-0.408161	-1.29622	0.133758	0.438739	1	2376	tags=22%, list=11%, signal=25%
SERVITJA_ISLET_HNF1A_TARGETS_UP	153	-0.314361	-1.29589	0.0566038	0.438781	1	3387	tags=24%, list=15%, signal=28%
LEE_METASTASIS_AND_ALTERNATIVE_SPLICING_DN	36	-0.403442	-1.2958	0.111455	0.438159	1	901	tags=14%, list=4%, signal=14%
ZWANG_EGF_PERSISTENTLY_DN	44	-0.384005	-1.29531	0.115265	0.438521	1	4579	tags=36%, list=21%, signal=46%
CHIBA_RESPONSE_TO_TSA_UP	44	-0.384874	-1.29473	0.125758	0.439138	1	1483	tags=23%, list=7%, signal=24%
WENG_POR_TARGETS_LIVER_UP	32	-0.405008	-1.29444	0.146341	0.439019	1	2226	tags=25%, list=10%, signal=28%
VALK_AML_CLUSTER_10	26	-0.436131	-1.29288	0.15025	0.442335	1	4960	tags=46%, list=23%, signal=60%
MULLIGHAN_MLL_SIGNATURE_1_DN	190	-0.305362	-1.29243	0.0564304	0.442734	1	3955	tags=25%, list=18%, signal=30%
WEST_ADRENOCORTICAL_CARCINOMA_VS_ADENOMA_DN	17	-0.475377	-1.29209	0.141463	0.442757	1	3449	tags=24%, list=16%, signal=28%
HUMMERICH_SKIN_CANCER_PROGRESSION_DN	95	-0.337266	-1.29195	0.0834532	0.442235	1	4408	tags=29%, list=20%, signal=37%
XU_HGF_TARGETS_REPRESSED_BY_AKT1_DN	64	-0.357266	-1.29178	0.0945946	0.441765	1	3748	tags=28%, list=17%, signal=34%
ZHAN_MULTIPLE_MYELOMA_LB_DN	29	-0.417658	-1.29156	0.136725	0.441503	1	6468	tags=52%, list=30%, signal=73%
INGRAM_SHH_TARGETS_UP	105	-0.327767	-1.29057	0.0832158	0.443325	1	2005	tags=16%, list=9%, signal=18%
SHETH_LIVER_CANCER_VS_TXNIP_LOSS_PAM4	221	-0.299136	-1.28954	0.0368906	0.445158	1	5059	tags=31%, list=23%, signal=40%
TURASHVILI_BREAST_LOBULAR_CARCINOMA_VS_DUCTAL_NORMAL_DN	68	-0.358638	-1.28911	0.0854962	0.44539	1	2694	tags=21%, list=12%, signal=23%
KORKOLA_TERATOMA	35	-0.400824	-1.28906	0.127243	0.444659	1	1336	tags=14%, list=6%, signal=15%
BOQUEST_STEM_CELL_CULTURED_VS_FRESH_UP	352	-0.284794	-1.28755	0.0239808	0.448015	1	4841	tags=27%, list=22%, signal=34%
ABE_INNER_EAR	41	-0.384429	-1.28736	0.111658	0.447687	1	3244	tags=27%, list=15%, signal=31%
GRAHAM_CML_QUIESCENT_VS_NORMAL_QUIESCENT_DN	34	-0.39941	-1.28729	0.133779	0.447004	1	3683	tags=29%, list=17%, signal=35%
ISHIKAWA_STING_SIGNALING	7	-0.605434	-1.28704	0.184919	0.446847	1	4827	tags=57%, list=22%, signal=73%
BALDWIN_PRKCI_TARGETS_UP	32	-0.40606	-1.28691	0.144928	0.446365	1	5405	tags=44%, list=25%, signal=58%
PLASARI_TGFB1_SIGNALING_VIA_NFIC_1HR_UP	26	-0.423266	-1.28659	0.131012	0.446345	1	3835	tags=38%, list=18%, signal=47%
ACEVEDO_LIVER_CANCER_DN	408	-0.282197	-1.28652	0.0154578	0.445675	1	4956	tags=25%, list=23%, signal=32%
CORRE_MULTIPLE_MYELOMA_DN	49	-0.371037	-1.28642	0.101562	0.445088	1	5540	tags=39%, list=25%, signal=52%
HAHTOLA_SEZARY_SYNDROM_DN	31	-0.4145	-1.28605	0.14791	0.445191	1	5805	tags=45%, list=27%, signal=61%
GRAHAM_CML_QUIESCENT_VS_NORMAL_QUIESCENT_UP	72	-0.34913	-1.28601	0.0960699	0.444471	1	2082	tags=15%, list=10%, signal=17%
LIN_MELANOMA_COPY_NUMBER_DN	36	-0.394673	-1.28539	0.130368	0.44531	1	2720	tags=19%, list=12%, signal=22%
GOUYER_TATI_TARGETS_DN	16	-0.485405	-1.28423	0.168614	0.447434	1	2045	tags=31%, list=9%, signal=34%
SEMBA_FHIT_TARGETS_UP	8	-0.572957	-1.28355	0.168403	0.44845	1	2075	tags=38%, list=9%, signal=41%
RADAEVA_RESPONSE_TO_IFNA1_UP	45	-0.37356	-1.28294	0.131783	0.449213	1	7190	tags=49%, list=33%, signal=73%
IIZUKA_LIVER_CANCER_EARLY_RECURRENCE	8	-0.575022	-1.28255	0.178082	0.449383	1	4522	tags=50%, list=21%, signal=63%
FRIDMAN_SENESCENCE_DN	12	-0.517867	-1.28184	0.16844	0.45047	1	5269	tags=50%, list=24%, signal=66%
YAGI_AML_WITH_T_9_11_TRANSLOCATION	111	-0.321914	-1.28069	0.0726496	0.452654	1	4700	tags=27%, list=21%, signal=34%
TOMLINS_PROSTATE_CANCER_UP	31	-0.407586	-1.28046	0.133005	0.452461	1	3635	tags=16%, list=17%, signal=19%
BROWNE_HCMV_INFECTION_24HR_UP	131	-0.314277	-1.28036	0.0680272	0.451819	1	4333	tags=26%, list=20%, signal=32%
MCLACHLAN_DENTAL_CARIES_DN	182	-0.299557	-1.27999	0.0516556	0.451959	1	5104	tags=35%, list=23%, signal=45%
HOEBEKE_LYMPHOID_STEM_CELL_UP	73	-0.339976	-1.27967	0.0872781	0.451996	1	5927	tags=32%, list=27%, signal=43%
RORIE_TARGETS_OF_EWSR1_FLI1_FUSION_DN	27	-0.42365	-1.27912	0.152318	0.45268	1	2134	tags=22%, list=10%, signal=25%
SU_PANCREAS	38	-0.391432	-1.27877	0.119237	0.45279	1	4288	tags=34%, list=20%, signal=42%
STREICHER_LSM1_TARGETS_UP	40	-0.387298	-1.27854	0.128926	0.452564	1	3349	tags=30%, list=15%, signal=35%
SCHAEFFER_PROSTATE_DEVELOPMENT_6HR_UP	142	-0.313232	-1.27728	0.0682731	0.455095	1	4739	tags=25%, list=22%, signal=32%
WEBER_METHYLATED_IN_COLON_CANCER	11	-0.533243	-1.27702	0.174576	0.454905	1	5424	tags=55%, list=25%, signal=72%
CAFFAREL_RESPONSE_TO_THC_24HR_3_DN	12	-0.525112	-1.27672	0.194158	0.454814	1	4582	tags=33%, list=21%, signal=42%
ZHOU_PANCREATIC_EXOCRINE_PROGENITOR	8	-0.576751	-1.27647	0.185252	0.454664	1	5977	tags=63%, list=27%, signal=86%
SENESE_HDAC2_TARGETS_DN	102	-0.32872	-1.27596	0.0963504	0.455226	1	4108	tags=30%, list=19%, signal=37%
PLASARI_TGFB1_SIGNALING_VIA_NFIC_10HR_UP	43	-0.381779	-1.27526	0.115324	0.456164	1	3680	tags=30%, list=17%, signal=36%
BENPORATH_PRC2_TARGETS	500	-0.276274	-1.27505	0.0128806	0.455854	1	4837	tags=28%, list=22%, signal=36%
ZHENG_IL22_SIGNALING_DN	32	-0.402493	-1.27482	0.155483	0.455685	1	2333	tags=28%, list=11%, signal=31%
WEINMANN_ADAPTATION_TO_HYPOXIA_DN	36	-0.394367	-1.27459	0.141234	0.455515	1	5181	tags=39%, list=24%, signal=51%
MANTOVANI_NFKB_TARGETS_UP	39	-0.388836	-1.27424	0.138365	0.455682	1	4439	tags=38%, list=20%, signal=48%
VALK_AML_WITH_FLT3_ITD	36	-0.396708	-1.27376	0.124807	0.456165	1	4632	tags=36%, list=21%, signal=46%
MARTINELLI_IMMATURE_NEUTROPHIL_DN	6	-0.639451	-1.27321	0.181159	0.456784	1	2010	tags=33%, list=9%, signal=37%
GINESTIER_BREAST_CANCER_ZNF217_AMPLIFIED_UP	57	-0.357345	-1.27247	0.116844	0.457985	1	6965	tags=42%, list=32%, signal=62%
FUKUSHIMA_TNFSF11_TARGETS	15	-0.477645	-1.27239	0.165574	0.457398	1	3741	tags=47%, list=17%, signal=56%
SENESE_HDAC1_AND_HDAC2_TARGETS_DN	177	-0.301069	-1.27173	0.0674764	0.458331	1	3595	tags=24%, list=16%, signal=29%
KORKOLA_YOLK_SAC_TUMOR	49	-0.365804	-1.27095	0.14375	0.45966	1	6800	tags=53%, list=31%, signal=77%
BROWNE_HCMV_INFECTION_2HR_UP	28	-0.416696	-1.27075	0.144951	0.459338	1	3789	tags=36%, list=17%, signal=43%
SERVITJA_ISLET_HNF1A_TARGETS_DN	95	-0.328459	-1.27002	0.101744	0.460471	1	3522	tags=27%, list=16%, signal=32%
THUM_SYSTOLIC_HEART_FAILURE_DN	164	-0.306922	-1.2691	0.064	0.462133	1	7558	tags=41%, list=35%, signal=63%
RIZKI_TUMOR_INVASIVENESS_2D_DN	58	-0.356841	-1.26886	0.121581	0.461937	1	4667	tags=31%, list=21%, signal=39%
KHETCHOUMIAN_TRIM24_TARGETS_DN	8	-0.572818	-1.26749	0.185886	0.464877	1	4862	tags=63%, list=22%, signal=80%
WATANABE_ULCERATIVE_COLITIS_WITH_CANCER_UP	15	-0.482564	-1.26717	0.188356	0.464905	1	4902	tags=47%, list=22%, signal=60%
WANG_METASTASIS_OF_BREAST_CANCER_ESR1_DN	21	-0.443555	-1.267	0.149329	0.464552	1	5452	tags=38%, list=25%, signal=51%
PIEPOLI_LGI1_TARGETS_UP	13	-0.499384	-1.26678	0.198618	0.464345	1	4388	tags=38%, list=20%, signal=48%
XU_RESPONSE_TO_TRETINOIN_UP	14	-0.487115	-1.26555	0.181664	0.466781	1	2380	tags=29%, list=11%, signal=32%
CROMER_METASTASIS_UP	59	-0.351373	-1.26546	0.13872	0.466211	1	5807	tags=32%, list=27%, signal=44%
STEIN_ESRRA_TARGETS_RESPONSIVE_TO_ESTROGEN_DN	36	-0.388074	-1.26492	0.1264	0.466908	1	2097	tags=14%, list=10%, signal=15%
CHICAS_RB1_TARGETS_GROWING	204	-0.29833	-1.26456	0.0443864	0.467063	1	3103	tags=17%, list=14%, signal=20%
CHIARADONNA_NEOPLASTIC_TRANSFORMATION_KRAS_CDC25_UP	48	-0.364299	-1.26416	0.138978	0.467318	1	3337	tags=21%, list=15%, signal=25%
STAMBOLSKY_TARGETS_OF_MUTATED_TP53_DN	31	-0.398531	-1.26408	0.137161	0.466725	1	2749	tags=26%, list=13%, signal=29%
WU_APOPTOSIS_BY_CDKN1A_NOT_VIA_TP53	9	-0.539523	-1.26406	0.176776	0.465934	1	1053	tags=22%, list=5%, signal=23%
AMBROSINI_FLAVOPIRIDOL_TREATMENT_TP53	85	-0.334178	-1.26302	0.105563	0.468026	1	6112	tags=35%, list=28%, signal=49%
ZHANG_TLX_TARGETS_60HR_UP	254	-0.28755	-1.26267	0.0447205	0.468239	1	3321	tags=22%, list=15%, signal=26%
VANTVEER_BREAST_CANCER_ESR1_UP	119	-0.316582	-1.26266	0.0943662	0.467447	1	5927	tags=36%, list=27%, signal=49%
GRANDVAUX_IRF3_TARGETS_UP	14	-0.495495	-1.26206	0.168367	0.468177	1	3107	tags=29%, list=14%, signal=33%
PETROVA_ENDOTHELIUM_LYMPHATIC_VS_BLOOD_DN	137	-0.309925	-1.26182	0.0868307	0.467997	1	3093	tags=24%, list=14%, signal=28%
IIZUKA_LIVER_CANCER_PROGRESSION_G2_G3_DN	9	-0.542391	-1.26046	0.192101	0.470935	1	6501	tags=78%, list=30%, signal=111%
MEISSNER_NPC_HCP_WITH_H3K4ME2	381	-0.278235	-1.26033	0.0293083	0.470465	1	3927	tags=24%, list=18%, signal=29%
RUTELLA_RESPONSE_TO_HGF_UP	332	-0.282231	-1.26015	0.0443114	0.470114	1	5122	tags=27%, list=23%, signal=35%
KEEN_RESPONSE_TO_ROSIGLITAZONE_UP	31	-0.400385	-1.25928	0.149206	0.471702	1	2579	tags=23%, list=12%, signal=26%
WANG_TARGETS_OF_MLL_CBP_FUSION_UP	35	-0.391765	-1.25882	0.160514	0.472181	1	5874	tags=37%, list=27%, signal=51%
MANTOVANI_VIRAL_GPCR_SIGNALING_UP	75	-0.337847	-1.25751	0.114286	0.474977	1	2765	tags=25%, list=13%, signal=29%
JECHLINGER_EPITHELIAL_TO_MESENCHYMAL_TRANSITION_UP	65	-0.344743	-1.25635	0.117737	0.477384	1	5242	tags=40%, list=24%, signal=52%
GAUSSMANN_MLL_AF4_FUSION_TARGETS_F_DN	29	-0.404872	-1.25597	0.154723	0.477616	1	1152	tags=24%, list=5%, signal=25%
NAKAYAMA_SOFT_TISSUE_TUMORS_PCA1_DN	65	-0.344835	-1.25547	0.115031	0.478232	1	2901	tags=22%, list=13%, signal=25%
OHM_METHYLATED_IN_ADULT_CANCERS	24	-0.424814	-1.25514	0.169872	0.478312	1	2439	tags=25%, list=11%, signal=28%
YAO_HOXA10_TARGETS_VIA_PROGESTERONE_UP	70	-0.341212	-1.25476	0.134644	0.478569	1	2803	tags=21%, list=13%, signal=24%
NIKOLSKY_BREAST_CANCER_20P13_AMPLICON	7	-0.586994	-1.25279	0.208772	0.483257	1	21	tags=14%, list=0%, signal=14%
YAN_ESCAPE_FROM_ANOIKIS	20	-0.441829	-1.25232	0.167496	0.483728	1	2082	tags=30%, list=10%, signal=33%
MIKKELSEN_IPS_HCP_WITH_H3_UNMETHYLATED	59	-0.346115	-1.25207	0.108597	0.483627	1	2292	tags=19%, list=10%, signal=21%
CASORELLI_APL_SECONDARY_VS_DE_NOVO_UP	31	-0.401736	-1.25138	0.180511	0.484738	1	1511	tags=19%, list=7%, signal=21%
JAZAERI_BREAST_CANCER_BRCA1_VS_BRCA2_DN	36	-0.386114	-1.24977	0.160063	0.488463	1	3405	tags=31%, list=16%, signal=36%
RUTELLA_RESPONSE_TO_HGF_VS_CSF2RB_AND_IL4_UP	321	-0.278822	-1.24969	0.0478528	0.487852	1	5540	tags=30%, list=25%, signal=39%
GOBERT_OLIGODENDROCYTE_DIFFERENTIATION_DN	803	-0.262264	-1.24825	0.0131004	0.491006	1	4224	tags=22%, list=19%, signal=26%
BECKER_TAMOXIFEN_RESISTANCE_UP	44	-0.370444	-1.24768	0.14619	0.491864	1	3882	tags=27%, list=18%, signal=33%
CHIANG_LIVER_CANCER_SUBCLASS_CTNNB1_DN	136	-0.304255	-1.24744	0.10069	0.491758	1	5001	tags=33%, list=23%, signal=43%
DIERICK_SEROTONIN_FUNCTION_GENES	5	-0.643182	-1.24733	0.199634	0.491266	1	3449	tags=40%, list=16%, signal=47%
DACOSTA_ERCC3_ALLELE_XPCS_VS_TTD_DN	32	-0.394696	-1.24714	0.156495	0.491031	1	5980	tags=41%, list=27%, signal=56%
PARK_OSTEOBLAST_DIFFERENTIATION_BY_PHENYLAMIL_DN	5	-0.653635	-1.24711	0.204991	0.490293	1	2417	tags=60%, list=11%, signal=67%
MOOTHA_FFA_OXYDATION	18	-0.459991	-1.24709	0.184348	0.489518	1	7846	tags=67%, list=36%, signal=104%
ZHOU_PANCREATIC_BETA_CELL	7	-0.59402	-1.24608	0.205624	0.491608	1	5392	tags=43%, list=25%, signal=57%
TURJANSKI_MAPK7_TARGETS	8	-0.562501	-1.24608	0.212281	0.490809	1	273	tags=13%, list=1%, signal=13%
MCBRYAN_PUBERTAL_BREAST_3_4WK_UP	172	-0.296167	-1.24566	0.0862309	0.491191	1	3460	tags=22%, list=16%, signal=26%
VALK_AML_CLUSTER_1	24	-0.420137	-1.24466	0.176198	0.493201	1	6284	tags=54%, list=29%, signal=76%
KANG_IMMORTALIZED_BY_TERT_UP	78	-0.331413	-1.24433	0.108108	0.493345	1	4073	tags=29%, list=19%, signal=36%
DING_LUNG_CANCER_MUTATED_FREQUENTLY	12	-0.500214	-1.24324	0.221441	0.495676	1	7495	tags=67%, list=34%, signal=101%
PLASARI_NFIC_TARGETS_BASAL_UP	24	-0.428805	-1.2431	0.188498	0.495232	1	2055	tags=29%, list=9%, signal=32%
TERAMOTO_OPN_TARGETS_CLUSTER_8	6	-0.614953	-1.24251	0.192101	0.496001	1	1218	tags=33%, list=6%, signal=35%
BROWNE_HCMV_INFECTION_18HR_DN	146	-0.2994	-1.24147	0.107191	0.498088	1	4007	tags=27%, list=18%, signal=32%
HOLLMANN_APOPTOSIS_VIA_CD40_DN	200	-0.288802	-1.24085	0.0732919	0.498951	1	5798	tags=28%, list=26%, signal=38%
VANHARANTA_UTERINE_FIBROID_UP	38	-0.37452	-1.24036	0.155063	0.499476	1	3896	tags=32%, list=18%, signal=38%
MILICIC_FAMILIAL_ADENOMATOUS_POLYPOSIS_DN	8	-0.559068	-1.23928	0.214022	0.501793	1	1804	tags=38%, list=8%, signal=41%
BAUS_TFF2_TARGETS_UP	26	-0.410507	-1.23873	0.161667	0.502448	1	4895	tags=35%, list=22%, signal=45%
CHIARETTI_T_ALL_RELAPSE_PROGNOSIS	16	-0.458206	-1.23864	0.205128	0.501835	1	2488	tags=13%, list=11%, signal=14%
RODRIGUES_DCC_TARGETS_DN	105	-0.317623	-1.23807	0.10084	0.502601	1	4780	tags=28%, list=22%, signal=35%
DAVICIONI_MOLECULAR_ARMS_VS_ERMS_DN	146	-0.302691	-1.23732	0.0870748	0.503791	1	3863	tags=24%, list=18%, signal=29%
CHEOK_RESPONSE_TO_MERCAPTOPURINE_DN	18	-0.44065	-1.23673	0.200345	0.504699	1	4017	tags=33%, list=18%, signal=41%
LEIN_MEDULLA_MARKERS	67	-0.339626	-1.23642	0.129927	0.504744	1	2804	tags=22%, list=13%, signal=26%
BERENJENO_TRANSFORMED_BY_RHOA_FOREVER_UP	16	-0.467354	-1.23515	0.211382	0.507591	1	4321	tags=44%, list=20%, signal=54%
LIANG_HEMATOPOIESIS_STEM_CELL_NUMBER_SMALL_VS_HUGE_UP	31	-0.396581	-1.23414	0.1536	0.509588	1	5440	tags=39%, list=25%, signal=51%
WIERENGA_STAT5A_TARGETS_DN	157	-0.30189	-1.23375	0.0891892	0.509869	1	4402	tags=26%, list=20%, signal=32%
AMIT_EGF_RESPONSE_20_MCF10A	13	-0.485944	-1.23358	0.198653	0.509517	1	3093	tags=23%, list=14%, signal=27%
GARGALOVIC_RESPONSE_TO_OXIDIZED_PHOSPHOLIPIDS_YELLOW_DN	12	-0.487759	-1.23142	0.197574	0.515028	1	7008	tags=58%, list=32%, signal=86%
QI_PLASMACYTOMA_UP	247	-0.283431	-1.23129	0.0747782	0.514579	1	5565	tags=36%, list=25%, signal=48%
HATADA_METHYLATED_IN_LUNG_CANCER_UP	271	-0.276717	-1.22949	0.0707965	0.518903	1	5149	tags=32%, list=24%, signal=41%
RIZ_ERYTHROID_DIFFERENTIATION_6HR	33	-0.37949	-1.22835	0.162119	0.521396	1	3992	tags=30%, list=18%, signal=37%
MANTOVANI_NFKB_TARGETS_DN	10	-0.523837	-1.22768	0.20068	0.52256	1	6716	tags=60%, list=31%, signal=87%
TONKS_TARGETS_OF_RUNX1_RUNX1T1_FUSION_HSC_DN	150	-0.299239	-1.22706	0.108183	0.523546	1	5104	tags=31%, list=23%, signal=40%
LI_INDUCED_T_TO_NATURAL_KILLER_DN	106	-0.312684	-1.22656	0.114846	0.524201	1	3212	tags=23%, list=15%, signal=26%
LEE_AGING_CEREBELLUM_DN	73	-0.328809	-1.22552	0.126638	0.526421	1	3515	tags=26%, list=16%, signal=31%
TARTE_PLASMA_CELL_VS_PLASMABLAST_UP	304	-0.275615	-1.22534	0.0581818	0.526184	1	3785	tags=23%, list=17%, signal=28%
BROWNE_HCMV_INFECTION_12HR_DN	76	-0.326011	-1.22507	0.148905	0.526109	1	2733	tags=17%, list=12%, signal=19%
JUBAN_TARGETS_OF_SPI1_AND_FLI1_UP	96	-0.313927	-1.22486	0.129032	0.525881	1	5543	tags=30%, list=25%, signal=40%
GRANDVAUX_IRF3_TARGETS_DN	17	-0.452461	-1.22377	0.210526	0.528297	1	4310	tags=35%, list=20%, signal=44%
LEIN_PONS_MARKERS	78	-0.323719	-1.22345	0.141429	0.528352	1	5724	tags=38%, list=26%, signal=52%
ZHOU_INFLAMMATORY_RESPONSE_LIVE_UP	337	-0.27131	-1.223	0.0544794	0.528852	1	3570	tags=22%, list=16%, signal=25%
DUNNE_TARGETS_OF_AML1_MTG8_FUSION_UP	38	-0.372509	-1.22271	0.175523	0.528859	1	6972	tags=58%, list=32%, signal=85%
ROZANOV_MMP14_CORRELATED	11	-0.502155	-1.22241	0.225688	0.528895	1	2596	tags=27%, list=12%, signal=31%
GAVIN_FOXP3_TARGETS_CLUSTER_P4	80	-0.325343	-1.22228	0.131268	0.528462	1	2812	tags=21%, list=13%, signal=24%
CHANG_POU5F1_TARGETS_UP	13	-0.477292	-1.22126	0.233937	0.530541	1	2223	tags=31%, list=10%, signal=34%
HELLER_HDAC_TARGETS_SILENCED_BY_METHYLATION_UP	337	-0.270297	-1.22054	0.0562347	0.531894	1	3387	tags=21%, list=15%, signal=24%
CADWELL_ATG16L1_TARGETS_DN	50	-0.348645	-1.22021	0.190476	0.532008	1	4517	tags=32%, list=21%, signal=40%
JU_AGING_TERC_TARGETS_UP	9	-0.540098	-1.21976	0.23951	0.532515	1	2945	tags=44%, list=13%, signal=51%
CHEOK_RESPONSE_TO_HD_MTX_DN	21	-0.421351	-1.21899	0.180195	0.533889	1	5941	tags=38%, list=27%, signal=52%
ELLWOOD_MYC_TARGETS_DN	31	-0.389117	-1.21877	0.173139	0.533603	1	7389	tags=52%, list=34%, signal=78%
NIELSEN_LEIOMYOSARCOMA_CNN1_DN	18	-0.4368	-1.21859	0.225806	0.533276	1	7429	tags=67%, list=34%, signal=101%
POS_RESPONSE_TO_HISTAMINE_UP	9	-0.530791	-1.21797	0.236615	0.534314	1	6740	tags=67%, list=31%, signal=96%
SCHLESINGER_METHYLATED_DE_NOVO_IN_CANCER	79	-0.323652	-1.21765	0.160059	0.534375	1	4121	tags=25%, list=19%, signal=31%
CHEMNITZ_RESPONSE_TO_PROSTAGLANDIN_E2_DN	262	-0.27771	-1.21742	0.0781638	0.534205	1	2756	tags=18%, list=13%, signal=20%
RAY_TARGETS_OF_P210_BCR_ABL_FUSION_UP	14	-0.476194	-1.21722	0.224456	0.533984	1	5548	tags=50%, list=25%, signal=67%
ZHAN_MULTIPLE_MYELOMA_DN	34	-0.373451	-1.21707	0.198098	0.533605	1	6564	tags=50%, list=30%, signal=71%
ZIRN_TRETINOIN_RESPONSE_DN	6	-0.606437	-1.21665	0.249567	0.534091	1	748	tags=17%, list=3%, signal=17%
VANTVEER_BREAST_CANCER_POOR_PROGNOSIS	42	-0.361419	-1.21574	0.182986	0.535903	1	4732	tags=31%, list=22%, signal=39%
SPIELMAN_LYMPHOBLAST_EUROPEAN_VS_ASIAN_2FC_DN	16	-0.457977	-1.21545	0.211823	0.535885	1	5625	tags=38%, list=26%, signal=50%
CHEN_METABOLIC_SYNDROM_NETWORK	955	-0.251494	-1.21489	0.0138593	0.536772	1	4857	tags=26%, list=22%, signal=32%
CHOW_RASSF1_TARGETS_DN	25	-0.407121	-1.21439	0.204931	0.537504	1	5707	tags=28%, list=26%, signal=38%
SASAI_RESISTANCE_TO_NEOPLASTIC_TRANSFROMATION	49	-0.356407	-1.21438	0.174923	0.53673	1	2422	tags=29%, list=11%, signal=32%
THUM_SYSTOLIC_HEART_FAILURE_UP	328	-0.27244	-1.21365	0.0666667	0.537972	1	5246	tags=26%, list=24%, signal=34%
LINDGREN_BLADDER_CANCER_CLUSTER_2A_DN	103	-0.312577	-1.21362	0.13674	0.537233	1	6762	tags=36%, list=31%, signal=52%
HUTTMANN_B_CLL_POOR_SURVIVAL_UP	215	-0.283407	-1.21309	0.100125	0.537929	1	4582	tags=26%, list=21%, signal=32%
PARK_APL_PATHOGENESIS_UP	13	-0.476771	-1.21208	0.21017	0.539906	1	273	tags=15%, list=1%, signal=16%
IWANAGA_CARCINOGENESIS_BY_KRAS_PTEN_DN	267	-0.27706	-1.21196	0.0865266	0.539443	1	2926	tags=18%, list=13%, signal=21%
VALK_AML_WITH_CEBPA	30	-0.390267	-1.2118	0.210361	0.539116	1	1620	tags=17%, list=7%, signal=18%
LIM_MAMMARY_STEM_CELL_UP	412	-0.265504	-1.21168	0.0513419	0.538691	1	3126	tags=21%, list=14%, signal=24%
ONDER_CDH1_TARGETS_3_UP	16	-0.464183	-1.21098	0.230637	0.539919	1	5497	tags=44%, list=25%, signal=58%
HE_PTEN_TARGETS_UP	16	-0.451361	-1.21068	0.220228	0.539958	1	500	tags=13%, list=2%, signal=13%
PETROVA_ENDOTHELIUM_LYMPHATIC_VS_BLOOD_UP	112	-0.303828	-1.21066	0.130682	0.539205	1	4548	tags=26%, list=21%, signal=33%
JISON_SICKLE_CELL_DISEASE_UP	150	-0.292942	-1.21031	0.127747	0.539384	1	2167	tags=17%, list=10%, signal=18%
BOYLAN_MULTIPLE_MYELOMA_C_D_DN	213	-0.280017	-1.21027	0.0985545	0.538698	1	4358	tags=26%, list=20%, signal=33%
BENPORATH_ES_WITH_H3K27ME3	871	-0.251536	-1.21024	0.0214823	0.537996	1	4846	tags=28%, list=22%, signal=34%
FIGUEROA_AML_METHYLATION_CLUSTER_3_DN	25	-0.411801	-1.21018	0.219512	0.537379	1	2644	tags=20%, list=12%, signal=23%
CHESLER_BRAIN_D6MIT150_QTL_TRANS	8	-0.550963	-1.20968	0.256184	0.538021	1	8042	tags=75%, list=37%, signal=119%
MEISSNER_BRAIN_HCP_WITH_H3K4ME2	13	-0.484634	-1.20917	0.238908	0.538713	1	2863	tags=31%, list=13%, signal=35%
FOURNIER_ACINAR_DEVELOPMENT_EARLY_UP	16	-0.439128	-1.20916	0.211129	0.537965	1	5003	tags=44%, list=23%, signal=57%
BARRIER_CANCER_RELAPSE_NORMAL_SAMPLE_UP	26	-0.409784	-1.2091	0.20813	0.537346	1	2923	tags=27%, list=13%, signal=31%
LE_SKI_TARGETS_UP	15	-0.44856	-1.209	0.224959	0.536858	1	332	tags=20%, list=2%, signal=20%
BROWNE_HCMV_INFECTION_24HR_DN	123	-0.298355	-1.20821	0.109875	0.538445	1	4048	tags=24%, list=18%, signal=30%
RODRIGUES_THYROID_CARCINOMA_POORLY_DIFFERENTIATED_DN	551	-0.259895	-1.20793	0.0468037	0.538465	1	4873	tags=23%, list=22%, signal=29%
MEISSNER_BRAIN_ICP_WITH_H3K4ME3	19	-0.443171	-1.20698	0.217391	0.540507	1	4362	tags=37%, list=20%, signal=46%
GAVIN_FOXP3_TARGETS_CLUSTER_P2	57	-0.343534	-1.20697	0.182946	0.539736	1	6352	tags=39%, list=29%, signal=54%
SCHAEFFER_PROSTATE_DEVELOPMENT_AND_CANCER_BOX2_DN	6	-0.598947	-1.20672	0.248288	0.539692	1	275	tags=17%, list=1%, signal=17%
KIM_RESPONSE_TO_TSA_AND_DECITABINE_UP	98	-0.309558	-1.20669	0.1443	0.538992	1	3439	tags=24%, list=16%, signal=29%
MOOTHA_GLYCOGEN_METABOLISM	18	-0.449665	-1.20613	0.212219	0.539888	1	4415	tags=33%, list=20%, signal=42%
LEE_CALORIE_RESTRICTION_MUSCLE_UP	36	-0.373438	-1.20408	0.197512	0.545036	1	3616	tags=25%, list=17%, signal=30%
BERNARD_PPAPDC1B_TARGETS_UP	30	-0.385578	-1.20402	0.21129	0.544449	1	5036	tags=30%, list=23%, signal=39%
YAGI_AML_FAB_MARKERS	166	-0.289983	-1.20379	0.113182	0.544295	1	6347	tags=34%, list=29%, signal=48%
SCIBETTA_KDM5B_TARGETS_DN	63	-0.333098	-1.20248	0.177253	0.547402	1	2560	tags=16%, list=12%, signal=18%
WAKABAYASHI_ADIPOGENESIS_PPARG_RXRA_BOUND_36HR	111	-0.305701	-1.20243	0.150568	0.546757	1	7843	tags=40%, list=36%, signal=61%
HOFFMANN_IMMATURE_TO_MATURE_B_LYMPHOCYTE_DN	44	-0.352025	-1.20182	0.208655	0.547662	1	3544	tags=23%, list=16%, signal=27%
HOFMANN_MYELODYSPLASTIC_SYNDROM_RISK_DN	17	-0.434552	-1.20162	0.204738	0.54747	1	3323	tags=29%, list=15%, signal=35%
TSUDA_ALVEOLAR_SOFT_PART_SARCOMA	8	-0.544646	-1.20135	0.251291	0.547426	1	1862	tags=13%, list=9%, signal=14%
WORSCHECH_TUMOR_EVASION_AND_TOLEROGENICITY_UP	29	-0.390524	-1.20105	0.206667	0.547519	1	4827	tags=34%, list=22%, signal=44%
RAFFEL_VEGFA_TARGETS_DN	5	-0.610829	-1.20102	0.255556	0.546822	1	41	tags=20%, list=0%, signal=20%
YAMASHITA_LIVER_CANCER_STEM_CELL_DN	64	-0.33421	-1.20096	0.162003	0.546189	1	2149	tags=22%, list=10%, signal=24%
ZHANG_GATA6_TARGETS_UP	14	-0.465763	-1.20071	0.223684	0.546133	1	4532	tags=50%, list=21%, signal=63%
BROWNE_HCMV_INFECTION_8HR_DN	34	-0.376062	-1.20026	0.236273	0.546683	1	5855	tags=41%, list=27%, signal=56%
ELVIDGE_HIF2A_TARGETS_UP	5	-0.62619	-1.20025	0.258929	0.545926	1	3547	tags=60%, list=16%, signal=72%
GREENBAUM_E2A_TARGETS_DN	15	-0.46174	-1.19938	0.247492	0.547782	1	6636	tags=47%, list=30%, signal=67%
KLEIN_PRIMARY_EFFUSION_LYMPHOMA_DN	46	-0.352899	-1.19896	0.185299	0.548207	1	4656	tags=33%, list=21%, signal=41%
LENAOUR_DENDRITIC_CELL_MATURATION_UP	94	-0.312756	-1.19864	0.149856	0.548397	1	6409	tags=40%, list=29%, signal=57%
YOSHIMURA_MAPK8_TARGETS_UP	1115	-0.247938	-1.19837	0.0178759	0.548345	1	3759	tags=21%, list=17%, signal=24%
RUAN_RESPONSE_TO_TROGLITAZONE_UP	24	-0.407371	-1.19827	0.220949	0.547829	1	7479	tags=50%, list=34%, signal=76%
BOYERINAS_ONCOFETAL_TARGETS_OF_LET7A1	11	-0.491608	-1.19779	0.22629	0.548372	1	4197	tags=36%, list=19%, signal=45%
FRASOR_TAMOXIFEN_RESPONSE_DN	10	-0.511303	-1.19742	0.230384	0.548666	1	1691	tags=30%, list=8%, signal=32%
BERNARD_PPAPDC1B_TARGETS_DN	40	-0.363413	-1.19736	0.219512	0.548074	1	2471	tags=20%, list=11%, signal=23%
SEITZ_NEOPLASTIC_TRANSFORMATION_BY_8P_DELETION_UP	59	-0.335338	-1.19673	0.179878	0.549232	1	4424	tags=31%, list=20%, signal=38%
HENDRICKS_SMARCA4_TARGETS_DN	41	-0.359214	-1.19632	0.202946	0.549735	1	2617	tags=20%, list=12%, signal=22%
OZEN_MIR125B1_TARGETS	20	-0.428834	-1.19631	0.242475	0.54899	1	3196	tags=20%, list=15%, signal=23%
NAKAYAMA_FGF2_TARGETS	25	-0.40796	-1.19596	0.228041	0.549229	1	3787	tags=32%, list=17%, signal=39%
CHANG_CORE_SERUM_RESPONSE_DN	157	-0.288487	-1.19523	0.118667	0.550533	1	4541	tags=27%, list=21%, signal=34%
KUMAR_AUTOPHAGY_NETWORK	43	-0.357599	-1.19492	0.196108	0.550692	1	5038	tags=30%, list=23%, signal=39%
SEIDEN_MET_SIGNALING	18	-0.426681	-1.19407	0.227723	0.552442	1	4113	tags=28%, list=19%, signal=34%
LEE_LIVER_CANCER_ACOX1_DN	58	-0.336878	-1.1937	0.179372	0.552702	1	4048	tags=31%, list=18%, signal=38%
ZHENG_FOXP3_TARGETS_IN_T_LYMPHOCYTE_UP	10	-0.505555	-1.19349	0.25089	0.552565	1	7996	tags=70%, list=37%, signal=110%
STEIN_ESTROGEN_RESPONSE_NOT_VIA_ESRRA	17	-0.436793	-1.19324	0.251265	0.552538	1	2935	tags=24%, list=13%, signal=27%
LEE_DOUBLE_POLAR_THYMOCYTE	22	-0.413584	-1.19319	0.221138	0.551914	1	1297	tags=14%, list=6%, signal=14%
BYSTRYKH_HEMATOPOIESIS_STEM_CELL_FGF3	8	-0.543775	-1.19268	0.252708	0.55267	1	179	tags=13%, list=1%, signal=13%
TCGA_GLIOBLASTOMA_COPY_NUMBER_DN	26	-0.401872	-1.1925	0.212418	0.552478	1	3664	tags=31%, list=17%, signal=37%
BRIDEAU_IMPRINTED_GENES	57	-0.335111	-1.19227	0.202381	0.552382	1	7969	tags=47%, list=36%, signal=74%
CUI_TCF21_TARGETS_DN	28	-0.390388	-1.19212	0.20912	0.552016	1	4374	tags=32%, list=20%, signal=40%
DODD_NASOPHARYNGEAL_CARCINOMA_UP	1046	-0.247959	-1.19206	0.0201271	0.551426	1	4199	tags=23%, list=19%, signal=27%
NAKAMURA_ADIPOGENESIS_EARLY_DN	37	-0.370154	-1.19193	0.2125	0.551056	1	3528	tags=35%, list=16%, signal=42%
LEE_AGING_NEOCORTEX_DN	70	-0.324285	-1.1916	0.163077	0.551246	1	4189	tags=29%, list=19%, signal=35%
LEE_LIVER_CANCER_MYC_TGFA_UP	54	-0.339335	-1.19085	0.190108	0.552624	1	5122	tags=31%, list=23%, signal=41%
SU_LIVER	44	-0.351058	-1.1902	0.222571	0.553849	1	1018	tags=16%, list=5%, signal=17%
CROONQUIST_NRAS_VS_STROMAL_STIMULATION_UP	34	-0.366103	-1.18976	0.21	0.554423	1	7769	tags=59%, list=35%, signal=91%
CROONQUIST_NRAS_VS_STROMAL_STIMULATION_DN	80	-0.314422	-1.18928	0.170977	0.555114	1	3183	tags=20%, list=15%, signal=23%
GUENTHER_GROWTH_SPHERICAL_VS_ADHERENT_UP	20	-0.423485	-1.1892	0.256956	0.554579	1	1885	tags=30%, list=9%, signal=33%
NIELSEN_LEIOMYOSARCOMA_UP	14	-0.451411	-1.18914	0.240964	0.553991	1	5021	tags=50%, list=23%, signal=65%
XU_HGF_TARGETS_INDUCED_BY_AKT1_6HR	14	-0.462733	-1.18842	0.227197	0.55534	1	182	tags=14%, list=1%, signal=14%
DEMAGALHAES_AGING_UP	42	-0.359244	-1.18749	0.227273	0.557302	1	2022	tags=17%, list=9%, signal=18%
BONOME_OVARIAN_CANCER_POOR_SURVIVAL_UP	24	-0.404495	-1.18717	0.241653	0.557532	1	8099	tags=54%, list=37%, signal=86%
RHEIN_ALL_GLUCOCORTICOID_THERAPY_UP	60	-0.326906	-1.18686	0.191045	0.55775	1	3573	tags=22%, list=16%, signal=26%
BAKKER_FOXO3_TARGETS_UP	46	-0.3523	-1.18636	0.214925	0.558346	1	4582	tags=28%, list=21%, signal=36%
WANG_BARRETTS_ESOPHAGUS_AND_ESOPHAGUS_CANCER_UP	22	-0.407226	-1.18595	0.254045	0.55881	1	1134	tags=14%, list=5%, signal=14%
MEINHOLD_OVARIAN_CANCER_LOW_GRADE_UP	14	-0.46963	-1.1858	0.254237	0.558484	1	3543	tags=29%, list=16%, signal=34%
BENPORATH_SUZ12_TARGETS	794	-0.250014	-1.18532	0.0455531	0.55904	1	4837	tags=27%, list=22%, signal=33%
MULLIGHAN_MLL_SIGNATURE_2_UP	321	-0.266187	-1.1847	0.0892642	0.560104	1	5847	tags=29%, list=27%, signal=39%
CHESLER_BRAIN_QTL_CIS	56	-0.333781	-1.18446	0.204856	0.560068	1	3564	tags=20%, list=16%, signal=23%
BAKKER_FOXO3_TARGETS_DN	139	-0.289737	-1.18439	0.157182	0.559534	1	3453	tags=19%, list=16%, signal=23%
TAVAZOIE_METASTASIS	71	-0.319532	-1.18433	0.182229	0.558939	1	6139	tags=39%, list=28%, signal=55%
HERNANDEZ_ABERRANT_MITOSIS_BY_DOCETACEL_2NM_UP	66	-0.321783	-1.18366	0.205438	0.560158	1	4949	tags=42%, list=23%, signal=55%
ZHAN_MULTIPLE_MYELOMA_MS_DN	29	-0.379816	-1.18334	0.213166	0.560388	1	7285	tags=41%, list=33%, signal=62%
ROVERSI_GLIOMA_LOH_REGIONS	38	-0.357967	-1.18314	0.228261	0.560212	1	3055	tags=24%, list=14%, signal=27%
SENGUPTA_NASOPHARYNGEAL_CARCINOMA_WITH_LMP1_DN	101	-0.302699	-1.1824	0.172222	0.561647	1	3496	tags=26%, list=16%, signal=30%
SMID_BREAST_CANCER_ERBB2_DN	5	-0.626779	-1.1823	0.267161	0.561179	1	3496	tags=60%, list=16%, signal=71%
XU_AKT1_TARGETS_6HR	21	-0.414753	-1.18182	0.237942	0.561854	1	6576	tags=43%, list=30%, signal=61%
JI_RESPONSE_TO_FSH_UP	63	-0.326333	-1.18142	0.208955	0.562269	1	4724	tags=33%, list=22%, signal=42%
VARELA_ZMPSTE24_TARGETS_DN	31	-0.378179	-1.18042	0.224	0.56441	1	4750	tags=39%, list=22%, signal=49%
LEE_LIVER_CANCER_DENA_DN	64	-0.326477	-1.1783	0.194903	0.569855	1	4700	tags=31%, list=21%, signal=40%
GAVIN_FOXP3_TARGETS_CLUSTER_P3	128	-0.290025	-1.17829	0.169916	0.569127	1	5147	tags=27%, list=24%, signal=36%
VANTVEER_BREAST_CANCER_METASTASIS_UP	40	-0.354826	-1.17824	0.219512	0.568496	1	4621	tags=35%, list=21%, signal=44%
VERRECCHIA_RESPONSE_TO_TGFB1_C1	18	-0.428899	-1.17814	0.261563	0.568029	1	1040	tags=17%, list=5%, signal=17%
KATSANOU_ELAVL1_TARGETS_DN	118	-0.295709	-1.17776	0.172222	0.568357	1	3551	tags=22%, list=16%, signal=26%
BRUNO_HEMATOPOIESIS	60	-0.324747	-1.17766	0.205128	0.567922	1	3730	tags=22%, list=17%, signal=26%
CHIARADONNA_NEOPLASTIC_TRANSFORMATION_KRAS_CDC25_DN	48	-0.337314	-1.17741	0.201908	0.56793	1	4532	tags=31%, list=21%, signal=39%
GENTLES_LEUKEMIC_STEM_CELL_UP	22	-0.413418	-1.17723	0.256667	0.567697	1	3114	tags=32%, list=14%, signal=37%
COWLING_MYCN_TARGETS	35	-0.368223	-1.17697	0.22741	0.56779	1	4999	tags=37%, list=23%, signal=48%
DANG_REGULATED_BY_MYC_DN	220	-0.275023	-1.17667	0.131744	0.567938	1	2712	tags=16%, list=12%, signal=18%
EBAUER_MYOGENIC_TARGETS_OF_PAX3_FOXO1_FUSION	47	-0.347839	-1.17662	0.207891	0.567337	1	2444	tags=19%, list=11%, signal=22%
ROSS_AML_WITH_MLL_FUSIONS	65	-0.330022	-1.17657	0.211568	0.56674	1	4246	tags=26%, list=19%, signal=32%
BROWNE_HCMV_INFECTION_30MIN_DN	111	-0.298259	-1.17614	0.164993	0.567188	1	3227	tags=24%, list=15%, signal=28%
RIGGINS_TAMOXIFEN_RESISTANCE_DN	174	-0.281539	-1.17491	0.144986	0.570186	1	6859	tags=36%, list=31%, signal=52%
BORLAK_LIVER_CANCER_EGF_UP	48	-0.340918	-1.17451	0.222388	0.570635	1	2170	tags=17%, list=10%, signal=18%
JOSEPH_RESPONSE_TO_SODIUM_BUTYRATE_DN	52	-0.339935	-1.17429	0.201563	0.570504	1	4414	tags=31%, list=20%, signal=38%
ROSS_LEUKEMIA_WITH_MLL_FUSIONS	64	-0.323297	-1.17397	0.212833	0.570734	1	5294	tags=30%, list=24%, signal=39%
NATSUME_RESPONSE_TO_INTERFERON_BETA_UP	62	-0.326968	-1.17359	0.20362	0.571105	1	3573	tags=26%, list=16%, signal=31%
BROWNE_HCMV_INFECTION_30MIN_UP	45	-0.344306	-1.17276	0.222749	0.572825	1	2722	tags=24%, list=12%, signal=28%
SMIRNOV_RESPONSE_TO_IR_6HR_DN	98	-0.301436	-1.17235	0.185239	0.573336	1	5761	tags=37%, list=26%, signal=50%
IVANOVA_HEMATOPOIESIS_STEM_CELL_LONG_TERM	231	-0.271871	-1.17224	0.127086	0.572916	1	4692	tags=26%, list=21%, signal=33%
MCGOWAN_RSP6_TARGETS_UP	16	-0.435576	-1.17212	0.267703	0.572557	1	1703	tags=13%, list=8%, signal=14%
ROSS_AML_OF_FAB_M7_TYPE	64	-0.325336	-1.17192	0.213986	0.572393	1	5092	tags=28%, list=23%, signal=37%
MORI_LARGE_PRE_BII_LYMPHOCYTE_DN	46	-0.343782	-1.17186	0.250404	0.571823	1	4846	tags=39%, list=22%, signal=50%
ROSS_ACUTE_MYELOID_LEUKEMIA_CBF	64	-0.326207	-1.17102	0.21374	0.573515	1	3683	tags=27%, list=17%, signal=32%
HOFFMANN_SMALL_PRE_BII_TO_IMMATURE_B_LYMPHOCYTE_UP	58	-0.328085	-1.17086	0.20216	0.573239	1	4389	tags=29%, list=20%, signal=37%
NELSON_RESPONSE_TO_ANDROGEN_DN	19	-0.415782	-1.16966	0.247892	0.576146	1	5618	tags=47%, list=26%, signal=64%
ZIRN_TRETINOIN_RESPONSE_WT1_UP	19	-0.411511	-1.16758	0.247541	0.581584	1	3462	tags=37%, list=16%, signal=44%
WELCH_GATA1_TARGETS	19	-0.419317	-1.16741	0.26149	0.581318	1	2681	tags=21%, list=12%, signal=24%
DUNNE_TARGETS_OF_AML1_MTG8_FUSION_DN	17	-0.430505	-1.16735	0.26178	0.580732	1	2425	tags=29%, list=11%, signal=33%
ZEMBUTSU_SENSITIVITY_TO_MITOMYCIN	14	-0.443549	-1.16678	0.261084	0.581798	1	2358	tags=29%, list=11%, signal=32%
FIGUEROA_AML_METHYLATION_CLUSTER_6_DN	23	-0.400734	-1.16631	0.259631	0.582528	1	3084	tags=39%, list=14%, signal=45%
PARK_HSC_VS_MULTIPOTENT_PROGENITORS_UP	15	-0.442775	-1.16623	0.261246	0.582033	1	1057	tags=13%, list=5%, signal=14%
FARMER_BREAST_CANCER_APOCRINE_VS_BASAL	258	-0.2647	-1.16611	0.123894	0.581596	1	5747	tags=30%, list=26%, signal=40%
SIMBULAN_UV_RESPONSE_NORMAL_UP	7	-0.542601	-1.1661	0.302026	0.580891	1	4613	tags=43%, list=21%, signal=54%
XU_GH1_EXOGENOUS_TARGETS_UP	52	-0.33271	-1.16577	0.210445	0.581179	1	1439	tags=15%, list=7%, signal=16%
OHASHI_AURKA_TARGETS	5	-0.611712	-1.1656	0.285461	0.580954	1	3103	tags=40%, list=14%, signal=47%
TAKADA_GASTRIC_CANCER_COPY_NUMBER_UP	7	-0.533373	-1.16526	0.30662	0.581233	1	2471	tags=29%, list=11%, signal=32%
GRAHAM_NORMAL_QUIESCENT_VS_NORMAL_DIVIDING_UP	52	-0.336365	-1.16461	0.236446	0.582467	1	3739	tags=25%, list=17%, signal=30%
MOHANKUMAR_TLX1_TARGETS_DN	134	-0.286641	-1.16424	0.179945	0.582835	1	4548	tags=28%, list=21%, signal=35%
PENG_RAPAMYCIN_RESPONSE_UP	159	-0.279244	-1.16421	0.161206	0.582164	1	6870	tags=40%, list=31%, signal=58%
JAZAG_TGFB1_SIGNALING_DN	29	-0.379905	-1.16362	0.253659	0.583184	1	5771	tags=41%, list=26%, signal=56%
WALLACE_PROSTATE_CANCER_RACE_DN	55	-0.328824	-1.16311	0.212308	0.583988	1	7733	tags=45%, list=35%, signal=70%
LIM_MAMMARY_LUMINAL_PROGENITOR_DN	11	-0.493012	-1.16308	0.283276	0.583352	1	5854	tags=55%, list=27%, signal=74%
MOLENAAR_TARGETS_OF_CCND1_AND_CDK4_UP	40	-0.344445	-1.16288	0.242472	0.583214	1	4144	tags=28%, list=19%, signal=34%
BERTUCCI_MEDULLARY_VS_DUCTAL_BREAST_CANCER_UP	146	-0.286066	-1.16247	0.177622	0.583806	1	4969	tags=28%, list=23%, signal=36%
MCCABE_HOXC6_TARGETS_CANCER_UP	25	-0.395074	-1.16111	0.241491	0.587097	1	6699	tags=48%, list=31%, signal=69%
ZHENG_FOXP3_TARGETS_IN_T_LYMPHOCYTE_DN	30	-0.376479	-1.16059	0.261589	0.587927	1	2610	tags=20%, list=12%, signal=23%
GUTIERREZ_WALDENSTROEMS_MACROGLOBULINEMIA_2	7	-0.550142	-1.16059	0.295053	0.587209	1	1522	tags=29%, list=7%, signal=31%
TURASHVILI_BREAST_LOBULAR_CARCINOMA_VS_LOBULAR_NORMAL_UP	74	-0.31241	-1.16057	0.204112	0.586509	1	2694	tags=19%, list=12%, signal=22%
BONOME_OVARIAN_CANCER_SURVIVAL_OPTIMAL_DEBULKING	183	-0.273135	-1.16055	0.150266	0.585848	1	5725	tags=30%, list=26%, signal=40%
TERAO_AOX4_TARGETS_SKIN_DN	13	-0.460485	-1.16008	0.291525	0.586543	1	1298	tags=31%, list=6%, signal=33%
ZWANG_TRANSIENTLY_UP_BY_2ND_EGF_PULSE_ONLY	916	-0.242547	-1.15943	0.0537057	0.587689	1	4524	tags=26%, list=21%, signal=32%
BENPORATH_EED_TARGETS	783	-0.243842	-1.15886	0.0694143	0.588585	1	4552	tags=24%, list=21%, signal=29%
CHEN_LVAD_SUPPORT_OF_FAILING_HEART_DN	39	-0.354299	-1.15856	0.237937	0.58872	1	2685	tags=23%, list=12%, signal=26%
PATTERSON_DOCETAXEL_RESISTANCE	26	-0.381425	-1.15837	0.270833	0.5886	1	3533	tags=31%, list=16%, signal=37%
BOYLAN_MULTIPLE_MYELOMA_PCA1_DN	8	-0.529094	-1.15779	0.291297	0.589578	1	4847	tags=50%, list=22%, signal=64%
AMUNDSON_POOR_SURVIVAL_AFTER_GAMMA_RADIATION_2G	132	-0.285121	-1.15745	0.171674	0.589853	1	3350	tags=20%, list=15%, signal=24%
LIANG_HEMATOPOIESIS_STEM_CELL_NUMBER_QTL	14	-0.445006	-1.15654	0.29085	0.591809	1	5440	tags=57%, list=25%, signal=76%
GRUETZMANN_PANCREATIC_CANCER_DN	176	-0.27607	-1.15621	0.194631	0.592009	1	5798	tags=29%, list=26%, signal=39%
HOFMANN_CELL_LYMPHOMA_DN	35	-0.361141	-1.15608	0.247961	0.591726	1	1784	tags=17%, list=8%, signal=19%
POMEROY_MEDULLOBLASTOMA_DESMOPLASIC_VS_CLASSIC_UP	50	-0.332489	-1.15608	0.206738	0.591015	1	400	tags=10%, list=2%, signal=10%
JIANG_AGING_HYPOTHALAMUS_DN	39	-0.353193	-1.15498	0.253106	0.593693	1	6368	tags=28%, list=29%, signal=40%
BILANGES_RAPAMYCIN_SENSITIVE_GENES	27	-0.370681	-1.1545	0.254516	0.594399	1	708	tags=7%, list=3%, signal=8%
FONTAINE_THYROID_TUMOR_UNCERTAIN_MALIGNANCY_DN	21	-0.399003	-1.15394	0.272431	0.595328	1	595	tags=19%, list=3%, signal=20%
KHETCHOUMIAN_TRIM24_TARGETS_UP	45	-0.337144	-1.15393	0.242658	0.594614	1	2829	tags=24%, list=13%, signal=28%
MONNIER_POSTRADIATION_TUMOR_ESCAPE_DN	272	-0.261531	-1.15343	0.145363	0.595368	1	6070	tags=32%, list=28%, signal=43%
MORI_IMMATURE_B_LYMPHOCYTE_UP	44	-0.340408	-1.15298	0.24252	0.595992	1	4846	tags=36%, list=22%, signal=47%
VERRECCHIA_DELAYED_RESPONSE_TO_TGFB1	36	-0.355338	-1.15229	0.277691	0.597351	1	3584	tags=25%, list=16%, signal=30%
HOFMANN_CELL_LYMPHOMA_UP	41	-0.345522	-1.15229	0.241275	0.596632	1	4541	tags=22%, list=21%, signal=28%
NADLER_OBESITY_UP	54	-0.326799	-1.15202	0.23494	0.596735	1	4719	tags=28%, list=22%, signal=35%
BRUINS_UVC_RESPONSE_VIA_TP53_GROUP_A	669	-0.244747	-1.15145	0.0835165	0.597835	1	4991	tags=26%, list=23%, signal=33%
HOLLEMAN_PREDNISOLONE_RESISTANCE_ALL_UP	10	-0.489343	-1.15118	0.289644	0.597919	1	4388	tags=30%, list=20%, signal=38%
SMID_BREAST_CANCER_RELAPSE_IN_PLEURA_UP	5	-0.599518	-1.15086	0.313653	0.598239	1	2371	tags=40%, list=11%, signal=45%
CHEN_ETV5_TARGETS_SERTOLI	17	-0.4224	-1.15052	0.289157	0.598566	1	5122	tags=59%, list=23%, signal=77%
MATSUDA_NATURAL_KILLER_DIFFERENTIATION	403	-0.25218	-1.15042	0.131361	0.598136	1	3636	tags=19%, list=17%, signal=22%
MIKKELSEN_ES_LCP_WITH_H3K4ME3_AND_H3K27ME3	5	-0.605879	-1.1503	0.302703	0.597788	1	5622	tags=60%, list=26%, signal=81%
GUILLAUMOND_KLF10_TARGETS_UP	46	-0.338208	-1.14988	0.243865	0.598315	1	4582	tags=33%, list=21%, signal=41%
KYNG_ENVIRONMENTAL_STRESS_RESPONSE_DN	15	-0.435176	-1.14972	0.259504	0.598065	1	2702	tags=20%, list=12%, signal=23%
CHANG_IMMORTALIZED_BY_HPV31_UP	57	-0.322807	-1.1491	0.239695	0.599218	1	4180	tags=25%, list=19%, signal=30%
LEE_NAIVE_T_LYMPHOCYTE	14	-0.437474	-1.14868	0.288889	0.599774	1	3388	tags=29%, list=15%, signal=34%
STEIN_ESR1_TARGETS	73	-0.313344	-1.1486	0.229197	0.599268	1	2033	tags=14%, list=9%, signal=15%
MIKKELSEN_MEF_ICP_WITH_H3K27ME3	144	-0.278171	-1.14812	0.205801	0.599983	1	4654	tags=31%, list=21%, signal=39%
NAKAMURA_BRONCHIAL_AND_BRONCHIOLAR_EPITHELIA	5	-0.600187	-1.14794	0.323636	0.599795	1	1939	tags=60%, list=9%, signal=66%
EBAUER_TARGETS_OF_PAX3_FOXO1_FUSION_UP	165	-0.275964	-1.14788	0.191946	0.599251	1	3192	tags=21%, list=15%, signal=25%
NIKOLSKY_OVERCONNECTED_IN_BREAST_CANCER	18	-0.413857	-1.14741	0.284014	0.599987	1	4188	tags=28%, list=19%, signal=34%
GOBERT_CORE_OLIGODENDROCYTE_DIFFERENTIATION	35	-0.35645	-1.14705	0.262992	0.600339	1	3573	tags=26%, list=16%, signal=31%
GAUSSMANN_MLL_AF4_FUSION_TARGETS_D_DN	7	-0.535646	-1.14699	0.310406	0.599804	1	3739	tags=57%, list=17%, signal=69%
KANG_AR_TARGETS_UP	17	-0.410031	-1.1468	0.279801	0.599675	1	3748	tags=35%, list=17%, signal=43%
DEURIG_T_CELL_PROLYMPHOCYTIC_LEUKEMIA_DN	230	-0.267348	-1.14653	0.159696	0.599787	1	6844	tags=35%, list=31%, signal=51%
MARIADASON_RESPONSE_TO_BUTYRATE_CURCUMIN_SULINDAC_TSA_8	13	-0.448348	-1.14651	0.289384	0.599133	1	6504	tags=46%, list=30%, signal=66%
WU_ALZHEIMER_DISEASE_DN	15	-0.443016	-1.14643	0.282178	0.598666	1	3213	tags=40%, list=15%, signal=47%
DACOSTA_ERCC3_ALLELE_XPCS_VS_TTD_UP	23	-0.393501	-1.14623	0.280936	0.598596	1	1815	tags=22%, list=8%, signal=24%
GINESTIER_BREAST_CANCER_20Q13_AMPLIFICATION_UP	82	-0.304005	-1.14535	0.230321	0.600503	1	5260	tags=30%, list=24%, signal=40%
BOSCO_TH1_CYTOTOXIC_MODULE	81	-0.302877	-1.14525	0.214697	0.60012	1	2765	tags=23%, list=13%, signal=27%
SANA_TNF_SIGNALING_UP	65	-0.310199	-1.14508	0.251543	0.599901	1	3387	tags=23%, list=15%, signal=27%
MELLMAN_TUT1_TARGETS_DN	42	-0.344772	-1.14481	0.264331	0.599979	1	1358	tags=14%, list=6%, signal=15%
HADDAD_T_LYMPHOCYTE_AND_NK_PROGENITOR_UP	64	-0.317605	-1.14408	0.225564	0.601418	1	3243	tags=23%, list=15%, signal=27%
GERHOLD_RESPONSE_TO_TZD_UP	6	-0.579103	-1.14384	0.330373	0.601414	1	3570	tags=50%, list=16%, signal=60%
VETTER_TARGETS_OF_PRKCA_AND_ETS1_DN	12	-0.464963	-1.14363	0.308348	0.60134	1	5996	tags=58%, list=27%, signal=80%
VALK_AML_CLUSTER_8	21	-0.398544	-1.14308	0.261637	0.602299	1	5707	tags=43%, list=26%, signal=58%
GRABARCZYK_BCL11B_TARGETS_DN	46	-0.33507	-1.14233	0.240683	0.603955	1	5141	tags=30%, list=23%, signal=40%
JACKSON_DNMT1_TARGETS_DN	25	-0.385895	-1.1414	0.291139	0.606007	1	3343	tags=28%, list=15%, signal=33%
CASORELLI_ACUTE_PROMYELOCYTIC_LEUKEMIA_UP	131	-0.281798	-1.13814	0.207219	0.615206	1	5485	tags=27%, list=25%, signal=36%
KYNG_DNA_DAMAGE_UP	195	-0.270358	-1.13777	0.181579	0.615583	1	5131	tags=28%, list=23%, signal=36%
CLIMENT_BREAST_CANCER_COPY_NUMBER_UP	22	-0.396147	-1.13697	0.259504	0.617368	1	1111	tags=14%, list=5%, signal=14%
OXFORD_RALB_TARGETS_UP	7	-0.537375	-1.13679	0.315298	0.617146	1	2223	tags=29%, list=10%, signal=32%
KANG_FLUOROURACIL_RESISTANCE_UP	19	-0.409728	-1.13641	0.272109	0.617635	1	1953	tags=21%, list=9%, signal=23%
GAVIN_IL2_RESPONSIVE_FOXP3_TARGETS_DN	5	-0.596676	-1.13639	0.315596	0.616969	1	1551	tags=40%, list=7%, signal=43%
HOELZEL_NF1_TARGETS_UP	105	-0.28745	-1.13623	0.233894	0.616756	1	5058	tags=27%, list=23%, signal=35%
SCHUETZ_BREAST_CANCER_DUCTAL_INVASIVE_DN	73	-0.307785	-1.1356	0.26009	0.617958	1	2694	tags=19%, list=12%, signal=22%
NIKOLSKY_BREAST_CANCER_17Q11_Q21_AMPLICON	73	-0.306675	-1.13535	0.263235	0.618004	1	5874	tags=29%, list=27%, signal=39%
VALK_AML_WITH_11Q23_REARRANGED	15	-0.425336	-1.13513	0.298305	0.617989	1	7264	tags=60%, list=33%, signal=90%
MOREIRA_RESPONSE_TO_TSA_DN	17	-0.417324	-1.13512	0.287145	0.617307	1	2439	tags=29%, list=11%, signal=33%
BOYLAN_MULTIPLE_MYELOMA_C_UP	34	-0.356465	-1.13505	0.296412	0.616806	1	1834	tags=18%, list=8%, signal=19%
KUMAR_PATHOGEN_LOAD_BY_MACROPHAGES	166	-0.272331	-1.13483	0.195155	0.616755	1	5038	tags=23%, list=23%, signal=30%
SHIRAISHI_PLZF_TARGETS_UP	8	-0.510727	-1.13414	0.300366	0.618143	1	182	tags=13%, list=1%, signal=13%
NAKAYAMA_FRA2_TARGETS	33	-0.355204	-1.13402	0.267311	0.617802	1	3755	tags=27%, list=17%, signal=33%
KAPOSI_LIVER_CANCER_MET_DN	6	-0.541179	-1.13326	0.321818	0.619416	1	6569	tags=83%, list=30%, signal=119%
AMUNDSON_POOR_SURVIVAL_AFTER_GAMMA_RADIATION_8G	83	-0.297678	-1.13269	0.248555	0.620448	1	5590	tags=34%, list=26%, signal=45%
POTTI_5FU_SENSITIVITY	31	-0.360914	-1.1323	0.2992	0.620898	1	4284	tags=29%, list=20%, signal=36%
HERNANDEZ_MITOTIC_ARREST_BY_DOCETAXEL_1_DN	33	-0.361175	-1.13152	0.28243	0.622674	1	5404	tags=33%, list=25%, signal=44%
BOGNI_TREATMENT_RELATED_MYELOID_LEUKEMIA_UP	18	-0.413607	-1.13146	0.285714	0.622155	1	6416	tags=39%, list=29%, signal=55%
SCHAEFFER_PROSTATE_DEVELOPMENT_48HR_UP	373	-0.248114	-1.13127	0.158019	0.622016	1	3953	tags=22%, list=18%, signal=27%
BUYTAERT_PHOTODYNAMIC_THERAPY_STRESS_DN	484	-0.243861	-1.13104	0.142349	0.622023	1	4067	tags=19%, list=19%, signal=23%
JAEGER_METASTASIS_DN	191	-0.266412	-1.13074	0.201872	0.622237	1	3400	tags=22%, list=16%, signal=26%
CHIARETTI_T_ALL_REFRACTORY_TO_THERAPY	25	-0.380016	-1.13001	0.290997	0.623707	1	5021	tags=36%, list=23%, signal=47%
KAAB_HEART_ATRIUM_VS_VENTRICLE_UP	209	-0.262683	-1.12888	0.191816	0.626385	1	4318	tags=26%, list=20%, signal=32%
BYSTROEM_CORRELATED_WITH_IL5_DN	58	-0.31389	-1.12827	0.258567	0.627511	1	8004	tags=43%, list=37%, signal=68%
TONKS_TARGETS_OF_RUNX1_RUNX1T1_FUSION_ERYTHROCYTE_UP	127	-0.277047	-1.12812	0.218182	0.627284	1	3809	tags=23%, list=17%, signal=27%
LEIN_NEURON_MARKERS	57	-0.317716	-1.12785	0.266362	0.627481	1	3780	tags=23%, list=17%, signal=27%
FERRANDO_LYL1_NEIGHBORS	15	-0.429236	-1.12767	0.309883	0.627335	1	7654	tags=60%, list=35%, signal=92%
ZHOU_CELL_CYCLE_GENES_IN_IR_RESPONSE_2HR	6	-0.555381	-1.12708	0.353591	0.628505	1	3858	tags=50%, list=18%, signal=61%
RIGGI_EWING_SARCOMA_PROGENITOR_DN	145	-0.274666	-1.1268	0.218232	0.628659	1	4502	tags=30%, list=21%, signal=38%
CHARAFE_BREAST_CANCER_LUMINAL_VS_MESENCHYMAL_UP	321	-0.251649	-1.12637	0.180348	0.629306	1	4713	tags=23%, list=22%, signal=29%
ZHOU_INFLAMMATORY_RESPONSE_FIMA_UP	359	-0.248326	-1.12616	0.175708	0.629216	1	3570	tags=20%, list=16%, signal=24%
TURJANSKI_MAPK14_TARGETS	9	-0.494076	-1.12453	0.319569	0.633594	1	273	tags=11%, list=1%, signal=11%
YE_METASTATIC_LIVER_CANCER	22	-0.38597	-1.12441	0.294613	0.633229	1	3921	tags=45%, list=18%, signal=55%
BROWNE_HCMV_INFECTION_16HR_DN	68	-0.30645	-1.12377	0.265306	0.634539	1	3508	tags=24%, list=16%, signal=28%
MISHRA_CARCINOMA_ASSOCIATED_FIBROBLAST_DN	17	-0.405479	-1.12168	0.305842	0.640426	1	3773	tags=24%, list=17%, signal=28%
LIU_PROSTATE_CANCER_DN	367	-0.24572	-1.12131	0.190361	0.640838	1	5057	tags=27%, list=23%, signal=34%
SMITH_TERT_TARGETS_DN	75	-0.304468	-1.12062	0.270231	0.642206	1	2022	tags=13%, list=9%, signal=15%
SU_KIDNEY	14	-0.442395	-1.11906	0.331046	0.646415	1	4549	tags=50%, list=21%, signal=63%
ZWANG_TRANSIENTLY_UP_BY_1ST_EGF_PULSE_ONLY	1046	-0.232884	-1.11903	0.105428	0.645785	1	5368	tags=27%, list=25%, signal=34%
MCBRYAN_TERMINAL_END_BUD_UP	11	-0.464426	-1.11849	0.298561	0.646787	1	6653	tags=45%, list=30%, signal=65%
CAIRO_LIVER_DEVELOPMENT_UP	141	-0.273553	-1.11768	0.231903	0.648617	1	5994	tags=37%, list=27%, signal=50%
HAHTOLA_CTCL_CUTANEOUS	22	-0.381522	-1.1167	0.309365	0.650909	1	4821	tags=27%, list=22%, signal=35%
EHLERS_ANEUPLOIDY_UP	32	-0.35229	-1.1162	0.3184	0.651745	1	1532	tags=16%, list=7%, signal=17%
BRUINS_UVC_RESPONSE_VIA_TP53_GROUP_D	206	-0.259234	-1.11606	0.212682	0.651448	1	3665	tags=21%, list=17%, signal=25%
TAKEDA_TARGETS_OF_NUP98_HOXA9_FUSION_10D_DN	101	-0.287004	-1.11431	0.26491	0.65625	1	5936	tags=35%, list=27%, signal=47%
MCCLUNG_DELTA_FOSB_TARGETS_2WK	40	-0.332629	-1.11424	0.297638	0.655752	1	2169	tags=20%, list=10%, signal=22%
GRAHAM_CML_DIVIDING_VS_NORMAL_QUIESCENT_DN	69	-0.302437	-1.11329	0.286969	0.658102	1	3362	tags=22%, list=15%, signal=26%
GAUSSMANN_MLL_AF4_FUSION_TARGETS_E_DN	18	-0.399582	-1.11279	0.321131	0.659007	1	1991	tags=33%, list=9%, signal=37%
HOLLEMAN_VINCRISTINE_RESISTANCE_B_ALL_DN	13	-0.44115	-1.11262	0.325082	0.658844	1	3244	tags=15%, list=15%, signal=18%
BROWNE_HCMV_INFECTION_48HR_DN	402	-0.243632	-1.11197	0.177458	0.660179	1	3400	tags=19%, list=16%, signal=23%
MAHADEVAN_IMATINIB_RESISTANCE_UP	17	-0.410775	-1.1119	0.333333	0.659683	1	8540	tags=59%, list=39%, signal=96%
CLAUS_PGR_POSITIVE_MENINGIOMA_UP	5	-0.573786	-1.11189	0.357143	0.658984	1	2527	tags=40%, list=12%, signal=45%
SCHAEFFER_PROSTATE_DEVELOPMENT_12HR_DN	45	-0.331081	-1.11149	0.292528	0.659534	1	2935	tags=20%, list=13%, signal=23%
MARKS_HDAC_TARGETS_DN	13	-0.435873	-1.11133	0.33279	0.659275	1	2638	tags=23%, list=12%, signal=26%
CERVERA_SDHB_TARGETS_1_DN	30	-0.355201	-1.11104	0.296825	0.659434	1	2744	tags=30%, list=13%, signal=34%
BOYAULT_LIVER_CANCER_SUBCLASS_G56_UP	10	-0.482762	-1.11071	0.331023	0.659796	1	3515	tags=50%, list=16%, signal=60%
PLASARI_TGFB1_SIGNALING_VIA_NFIC_10HR_DN	22	-0.385175	-1.11017	0.333333	0.660733	1	3471	tags=36%, list=16%, signal=43%
WATTEL_AUTONOMOUS_THYROID_ADENOMA_DN	43	-0.330251	-1.11016	0.302034	0.660071	1	3573	tags=33%, list=16%, signal=39%
YAGI_AML_WITH_11Q23_REARRANGED	306	-0.249815	-1.10904	0.212235	0.662881	1	5874	tags=29%, list=27%, signal=39%
NATSUME_RESPONSE_TO_INTERFERON_BETA_DN	41	-0.333282	-1.10879	0.309637	0.662954	1	4643	tags=24%, list=21%, signal=31%
HADDAD_B_LYMPHOCYTE_PROGENITOR	211	-0.258696	-1.10878	0.224384	0.662248	1	7300	tags=36%, list=33%, signal=54%
HELLEBREKERS_SILENCED_DURING_TUMOR_ANGIOGENESIS	66	-0.301157	-1.10856	0.301223	0.662238	1	2397	tags=18%, list=11%, signal=20%
VECCHI_GASTRIC_CANCER_ADVANCED_VS_EARLY_DN	94	-0.290207	-1.10856	0.268678	0.661518	1	7912	tags=47%, list=36%, signal=73%
MOTAMED_RESPONSE_TO_ANDROGEN_DN	6	-0.543775	-1.10721	0.368726	0.664991	1	7668	tags=83%, list=35%, signal=128%
FRIDMAN_SENESCENCE_UP	68	-0.301357	-1.10679	0.297972	0.665647	1	2121	tags=18%, list=10%, signal=19%
MOOTHA_ROS	6	-0.553916	-1.1062	0.368807	0.666844	1	9422	tags=83%, list=43%, signal=146%
HOSHIDA_LIVER_CANCER_SURVIVAL_DN	97	-0.286236	-1.10613	0.276109	0.666323	1	2923	tags=18%, list=13%, signal=20%
TORCHIA_TARGETS_OF_EWSR1_FLI1_FUSION_TOP20_DN	17	-0.414388	-1.10598	0.325543	0.666087	1	6110	tags=41%, list=28%, signal=57%
NIKOLSKY_BREAST_CANCER_11Q12_Q14_AMPLICON	116	-0.278349	-1.10595	0.261474	0.665475	1	5296	tags=28%, list=24%, signal=37%
MIYAGAWA_TARGETS_OF_EWSR1_ETS_FUSIONS_DN	164	-0.267234	-1.10579	0.252674	0.665213	1	3325	tags=21%, list=15%, signal=25%
LU_IL4_SIGNALING	80	-0.291617	-1.10543	0.296081	0.665663	1	4817	tags=25%, list=22%, signal=32%
JOHANSSON_GLIOMAGENESIS_BY_PDGFB_DN	16	-0.406782	-1.10542	0.322528	0.664971	1	554	tags=19%, list=3%, signal=19%
TONKS_TARGETS_OF_RUNX1_RUNX1T1_FUSION_SUSTAINED_IN_GRANULOCYTE_DN	7	-0.526369	-1.10505	0.366548	0.665378	1	6317	tags=71%, list=29%, signal=100%
HOFFMANN_LARGE_TO_SMALL_PRE_BII_LYMPHOCYTE_DN	62	-0.303713	-1.10502	0.29771	0.664773	1	5269	tags=32%, list=24%, signal=42%
LEE_TARGETS_OF_PTCH1_AND_SUFU_UP	71	-0.297215	-1.10477	0.293592	0.664849	1	6979	tags=48%, list=32%, signal=70%
MAHAJAN_RESPONSE_TO_IL1A_UP	70	-0.301848	-1.10416	0.305936	0.666063	1	6703	tags=44%, list=31%, signal=64%
WALLACE_PROSTATE_CANCER_DN	6	-0.534376	-1.10379	0.362676	0.666511	1	2371	tags=33%, list=11%, signal=37%
TSAI_DNAJB4_TARGETS_DN	6	-0.542555	-1.10274	0.36414	0.669184	1	274	tags=17%, list=1%, signal=17%
OXFORD_RALA_AND_RALB_TARGETS_DN	9	-0.486613	-1.10267	0.357143	0.668707	1	4738	tags=44%, list=22%, signal=57%
NIKOLSKY_BREAST_CANCER_10Q22_AMPLICON	5	-0.565901	-1.10245	0.366726	0.668654	1	2873	tags=40%, list=13%, signal=46%
WANG_RECURRENT_LIVER_CANCER_DN	16	-0.41095	-1.1017	0.338073	0.670354	1	2419	tags=19%, list=11%, signal=21%
MISSIAGLIA_REGULATED_BY_METHYLATION_UP	96	-0.28366	-1.1016	0.289174	0.669934	1	4073	tags=22%, list=19%, signal=27%
PARK_TRETINOIN_RESPONSE	11	-0.455888	-1.10021	0.347295	0.673557	1	2644	tags=36%, list=12%, signal=41%
MATZUK_OVULATION	14	-0.42934	-1.1	0.336735	0.673497	1	3953	tags=29%, list=18%, signal=35%
VANHARANTA_UTERINE_FIBROID_WITH_7Q_DELETION_DN	27	-0.352562	-1.09979	0.325243	0.673424	1	7558	tags=41%, list=35%, signal=62%
GRUETZMANN_PANCREATIC_CANCER_UP	305	-0.247107	-1.09963	0.231353	0.673223	1	3549	tags=18%, list=16%, signal=21%
BURTON_ADIPOGENESIS_12	23	-0.375737	-1.09923	0.32	0.673761	1	6126	tags=30%, list=28%, signal=42%
CALVET_IRINOTECAN_SENSITIVE_VS_RESISTANT_UP	5	-0.574754	-1.0987	0.374341	0.674755	1	774	tags=20%, list=4%, signal=21%
YAO_TEMPORAL_RESPONSE_TO_PROGESTERONE_CLUSTER_9	63	-0.301354	-1.09852	0.294586	0.674611	1	6846	tags=38%, list=31%, signal=55%
RICKMAN_HEAD_AND_NECK_CANCER_A	70	-0.296755	-1.09716	0.292576	0.678192	1	2943	tags=20%, list=13%, signal=23%
TOMIDA_LUNG_CANCER_POOR_SURVIVAL	5	-0.568326	-1.09684	0.388258	0.67844	1	2105	tags=40%, list=10%, signal=44%
LABBE_WNT3A_TARGETS_UP	100	-0.2803	-1.09624	0.288406	0.67962	1	4491	tags=26%, list=21%, signal=33%
DEMAGALHAES_AGING_DN	15	-0.422082	-1.09607	0.336918	0.679407	1	2075	tags=27%, list=9%, signal=29%
CROONQUIST_NRAS_SIGNALING_UP	34	-0.345559	-1.09575	0.32967	0.679702	1	7113	tags=50%, list=32%, signal=74%
XU_GH1_AUTOCRINE_TARGETS_DN	108	-0.276816	-1.09558	0.282158	0.679517	1	5413	tags=29%, list=25%, signal=38%
CHESLER_BRAIN_HIGHEST_GENETIC_VARIANCE	24	-0.373895	-1.09537	0.350734	0.679446	1	1448	tags=13%, list=7%, signal=13%
MYLLYKANGAS_AMPLIFICATION_HOT_SPOT_23	17	-0.404399	-1.09507	0.3367	0.679659	1	5464	tags=41%, list=25%, signal=55%
DELACROIX_RAR_TARGETS_UP	43	-0.325739	-1.09487	0.319084	0.679559	1	3462	tags=21%, list=16%, signal=25%
BENNETT_SYSTEMIC_LUPUS_ERYTHEMATOSUS	20	-0.384369	-1.09479	0.346218	0.679134	1	5565	tags=50%, list=25%, signal=67%
LEE_NEURAL_CREST_STEM_CELL_UP	124	-0.272509	-1.09345	0.286104	0.682755	1	2994	tags=23%, list=14%, signal=26%
GRAESSMANN_APOPTOSIS_BY_SERUM_DEPRIVATION_UP	434	-0.238277	-1.09328	0.205431	0.682515	1	3413	tags=19%, list=16%, signal=22%
CHYLA_CBFA2T3_TARGETS_DN	167	-0.262001	-1.09318	0.268717	0.682105	1	6031	tags=36%, list=28%, signal=49%
WENG_POR_TARGETS_LIVER_DN	16	-0.410091	-1.093	0.357711	0.681962	1	3114	tags=38%, list=14%, signal=44%
CHIANG_LIVER_CANCER_SUBCLASS_POLYSOMY7_DN	17	-0.410907	-1.0927	0.349073	0.682149	1	4977	tags=41%, list=23%, signal=53%
PROVENZANI_METASTASIS_UP	151	-0.265687	-1.09238	0.285714	0.682473	1	6702	tags=34%, list=31%, signal=48%
CHANG_IMMORTALIZED_BY_HPV31_DN	54	-0.309659	-1.09232	0.308527	0.681935	1	3107	tags=20%, list=14%, signal=24%
BARIS_THYROID_CANCER_DN	56	-0.310328	-1.0921	0.293495	0.681882	1	3544	tags=18%, list=16%, signal=21%
MA_MYELOID_DIFFERENTIATION_DN	41	-0.3323	-1.09173	0.319355	0.682379	1	3096	tags=22%, list=14%, signal=26%
VERHAAK_GLIOBLASTOMA_NEURAL	177	-0.260841	-1.09122	0.274869	0.683355	1	5086	tags=29%, list=23%, signal=37%
WANG_LSD1_TARGETS_UP	21	-0.378805	-1.09116	0.319797	0.682849	1	2156	tags=24%, list=10%, signal=26%
KUROKAWA_LIVER_CANCER_EARLY_RECURRENCE_UP	8	-0.483587	-1.09092	0.367021	0.682912	1	151	tags=13%, list=1%, signal=13%
MULLIGHAN_NPM1_MUTATED_SIGNATURE_2_DN	58	-0.309734	-1.09087	0.316418	0.682354	1	2025	tags=14%, list=9%, signal=15%
GARCIA_TARGETS_OF_FLI1_AND_DAX1_UP	39	-0.327943	-1.09059	0.327504	0.682504	1	1841	tags=13%, list=8%, signal=14%
BANDRES_RESPONSE_TO_CARMUSTIN_MGMT_48HR_UP	16	-0.410188	-1.09035	0.344884	0.682527	1	991	tags=13%, list=5%, signal=13%
KOBAYASHI_EGFR_SIGNALING_6HR_UP	7	-0.523041	-1.09023	0.383212	0.682227	1	8335	tags=57%, list=38%, signal=92%
NAKAMURA_ADIPOGENESIS_LATE_DN	35	-0.341243	-1.08924	0.313291	0.684709	1	3528	tags=34%, list=16%, signal=41%
MORI_MATURE_B_LYMPHOCYTE_DN	68	-0.297812	-1.08912	0.306122	0.684377	1	5847	tags=32%, list=27%, signal=44%
MULLIGHAN_NPM1_SIGNATURE_3_DN	123	-0.27272	-1.08786	0.30069	0.687738	1	3667	tags=19%, list=17%, signal=22%
MARSON_FOXP3_TARGETS_STIMULATED_UP	24	-0.371171	-1.08768	0.333333	0.687599	1	5130	tags=42%, list=23%, signal=54%
GAVIN_FOXP3_TARGETS_CLUSTER_P7	74	-0.295423	-1.08742	0.324238	0.687737	1	3051	tags=19%, list=14%, signal=22%
CHANG_POU5F1_TARGETS_DN	7	-0.50748	-1.08716	0.374768	0.687915	1	7325	tags=57%, list=33%, signal=86%
MYLLYKANGAS_AMPLIFICATION_HOT_SPOT_6	5	-0.58144	-1.08638	0.390977	0.689604	1	5173	tags=40%, list=24%, signal=52%
LIAN_NEUTROPHIL_GRANULE_CONSTITUENTS	21	-0.380236	-1.08599	0.369497	0.690151	1	3748	tags=29%, list=17%, signal=34%
POMEROY_MEDULLOBLASTOMA_DESMOPLASIC_VS_CLASSIC_DN	49	-0.317096	-1.08489	0.355083	0.692902	1	2075	tags=14%, list=9%, signal=16%
SENGUPTA_NASOPHARYNGEAL_CARCINOMA_UP	219	-0.251925	-1.08358	0.284047	0.696426	1	3714	tags=18%, list=17%, signal=21%
DASU_IL6_SIGNALING_SCAR_UP	25	-0.363916	-1.08343	0.350467	0.696164	1	3580	tags=24%, list=16%, signal=29%
SENGUPTA_NASOPHARYNGEAL_CARCINOMA_WITH_LMP1_UP	292	-0.242506	-1.08315	0.28034	0.696282	1	3365	tags=17%, list=15%, signal=20%
GARGALOVIC_RESPONSE_TO_OXIDIZED_PHOSPHOLIPIDS_RED_DN	18	-0.399486	-1.08294	0.346341	0.696242	1	2731	tags=17%, list=12%, signal=19%
BEIER_GLIOMA_STEM_CELL_DN	45	-0.316804	-1.08247	0.322437	0.697029	1	6141	tags=42%, list=28%, signal=59%
NING_CHRONIC_OBSTRUCTIVE_PULMONARY_DISEASE_DN	101	-0.27692	-1.08226	0.305634	0.696961	1	4497	tags=22%, list=21%, signal=27%
HOFFMANN_PRE_BI_TO_LARGE_PRE_BII_LYMPHOCYTE_DN	65	-0.299102	-1.08196	0.333333	0.697217	1	4532	tags=28%, list=21%, signal=35%
HOFMANN_MYELODYSPLASTIC_SYNDROM_HIGH_RISK_DN	15	-0.412359	-1.0815	0.357022	0.697898	1	7613	tags=60%, list=35%, signal=92%
EHRLICH_ICF_SYNDROM_UP	11	-0.451826	-1.0809	0.37931	0.699072	1	2025	tags=27%, list=9%, signal=30%
RUAN_RESPONSE_TO_TNF_TROGLITAZONE_UP	16	-0.391319	-1.08042	0.38254	0.699877	1	1775	tags=19%, list=8%, signal=20%
SAMOLS_TARGETS_OF_KHSV_MIRNAS_DN	43	-0.32403	-1.0797	0.336493	0.701424	1	3349	tags=26%, list=15%, signal=30%
MARSON_FOXP3_TARGETS_UP	61	-0.303308	-1.0781	0.364742	0.705875	1	3733	tags=21%, list=17%, signal=26%
FONTAINE_PAPILLARY_THYROID_CARCINOMA_DN	61	-0.296328	-1.07807	0.328551	0.705224	1	2522	tags=18%, list=12%, signal=20%
MCCLUNG_DELTA_FOSB_TARGETS_8WK	44	-0.321559	-1.07791	0.343939	0.705066	1	7565	tags=39%, list=35%, signal=59%
YAO_TEMPORAL_RESPONSE_TO_PROGESTERONE_CLUSTER_1	60	-0.302147	-1.07791	0.327381	0.704356	1	5855	tags=35%, list=27%, signal=48%
CHEOK_RESPONSE_TO_MERCAPTOPURINE_AND_LD_MTX_DN	13	-0.425308	-1.07766	0.38488	0.704418	1	4197	tags=38%, list=19%, signal=48%
KUNINGER_IGF1_VS_PDGFB_TARGETS_UP	67	-0.294315	-1.07691	0.329971	0.706034	1	4483	tags=30%, list=20%, signal=37%
WIEMANN_TELOMERE_SHORTENING_AND_CHRONIC_LIVER_DAMAGE_UP	6	-0.527268	-1.07679	0.397959	0.705716	1	420	tags=17%, list=2%, signal=17%
AZARE_NEOPLASTIC_TRANSFORMATION_BY_STAT3_DN	95	-0.2775	-1.07666	0.313869	0.705374	1	3570	tags=24%, list=16%, signal=29%
MALONEY_RESPONSE_TO_17AAG_UP	34	-0.338983	-1.07617	0.375594	0.706234	1	2412	tags=18%, list=11%, signal=20%
MCBRYAN_PUBERTAL_BREAST_5_6WK_DN	113	-0.271504	-1.07566	0.302292	0.707108	1	7580	tags=39%, list=35%, signal=59%
HOOI_ST7_TARGETS_DN	79	-0.2863	-1.07543	0.315485	0.707183	1	5345	tags=35%, list=24%, signal=47%
FIGUEROA_AML_METHYLATION_CLUSTER_1_UP	77	-0.288205	-1.07506	0.318731	0.707576	1	2152	tags=17%, list=10%, signal=19%
GOZGIT_ESR1_TARGETS_UP	106	-0.273811	-1.07499	0.315341	0.707109	1	4354	tags=26%, list=20%, signal=33%
GAUSSMANN_MLL_AF4_FUSION_TARGETS_A_DN	68	-0.298537	-1.07469	0.305797	0.707363	1	3709	tags=24%, list=17%, signal=28%
STARK_PREFRONTAL_CORTEX_22Q11_DELETION_UP	151	-0.258523	-1.07466	0.305707	0.706757	1	8060	tags=45%, list=37%, signal=71%
SEIKE_LUNG_CANCER_POOR_SURVIVAL	8	-0.486027	-1.07438	0.407986	0.70697	1	4228	tags=63%, list=19%, signal=77%
TURASHVILI_BREAST_CARCINOMA_DUCTAL_VS_LOBULAR_DN	5	-0.556523	-1.07407	0.406654	0.707312	1	74	tags=20%, list=0%, signal=20%
VERRECCHIA_RESPONSE_TO_TGFB1_C3	13	-0.424608	-1.07391	0.388889	0.707069	1	562	tags=15%, list=3%, signal=16%
MARTENS_TRETINOIN_RESPONSE_UP	566	-0.22962	-1.07362	0.252294	0.707321	1	3715	tags=21%, list=17%, signal=25%
MYLLYKANGAS_AMPLIFICATION_HOT_SPOT_24	12	-0.439951	-1.0732	0.376098	0.707913	1	7524	tags=42%, list=34%, signal=63%
BASSO_CD40_SIGNALING_DN	57	-0.301189	-1.07316	0.335878	0.707347	1	6131	tags=40%, list=28%, signal=56%
CREIGHTON_ENDOCRINE_THERAPY_RESISTANCE_2	247	-0.243588	-1.07281	0.287724	0.707781	1	4804	tags=24%, list=22%, signal=31%
KIM_MYC_AMPLIFICATION_TARGETS_DN	67	-0.296554	-1.07236	0.332382	0.708452	1	6146	tags=37%, list=28%, signal=52%
ROY_WOUND_BLOOD_VESSEL_DN	15	-0.401685	-1.0706	0.380035	0.713277	1	3011	tags=27%, list=14%, signal=31%
HOWLIN_CITED1_TARGETS_1_UP	27	-0.35254	-1.06851	0.357143	0.719152	1	2976	tags=22%, list=14%, signal=26%
DARWICHE_SQUAMOUS_CELL_CARCINOMA_DN	126	-0.262505	-1.06792	0.328652	0.720343	1	6220	tags=33%, list=28%, signal=45%
CHUNG_BLISTER_CYTOTOXICITY_UP	103	-0.271714	-1.06765	0.341326	0.720475	1	4435	tags=20%, list=20%, signal=25%
TESAR_ALK_AND_JAK_TARGETS_MOUSE_ES_D4_DN	6	-0.51952	-1.06763	0.420956	0.719825	1	5441	tags=50%, list=25%, signal=67%
GAZDA_DIAMOND_BLACKFAN_ANEMIA_MYELOID_DN	28	-0.348302	-1.06642	0.365609	0.72304	1	2681	tags=18%, list=12%, signal=20%
YAGI_AML_WITH_INV_16_TRANSLOCATION	335	-0.235998	-1.06576	0.284277	0.724465	1	4974	tags=22%, list=23%, signal=29%
LU_AGING_BRAIN_UP	220	-0.245649	-1.06557	0.30401	0.724369	1	6011	tags=31%, list=27%, signal=43%
MARKEY_RB1_CHRONIC_LOF_DN	99	-0.270248	-1.06529	0.343348	0.724569	1	4674	tags=27%, list=21%, signal=35%
ZEMBUTSU_SENSITIVITY_TO_CISPLATIN	18	-0.385224	-1.06522	0.366894	0.724062	1	2756	tags=22%, list=13%, signal=25%
PEPPER_CHRONIC_LYMPHOCYTIC_LEUKEMIA_UP	21	-0.37414	-1.06507	0.373817	0.723841	1	2638	tags=29%, list=12%, signal=32%
HU_GENOTOXIN_ACTION_DIRECT_VS_INDIRECT_4HR	33	-0.334216	-1.06397	0.357257	0.726644	1	5226	tags=24%, list=24%, signal=32%
GAVIN_FOXP3_TARGETS_CLUSTER_T7	81	-0.279949	-1.06368	0.346154	0.726907	1	3078	tags=15%, list=14%, signal=17%
HAN_SATB1_TARGETS_DN	340	-0.235987	-1.06365	0.305623	0.726275	1	3589	tags=18%, list=16%, signal=21%
BAE_BRCA1_TARGETS_DN	27	-0.34583	-1.06335	0.372828	0.726541	1	5011	tags=37%, list=23%, signal=48%
LI_INDUCED_T_TO_NATURAL_KILLER_UP	240	-0.244692	-1.06303	0.323604	0.72685	1	3289	tags=18%, list=15%, signal=20%
KYNG_DNA_DAMAGE_BY_GAMMA_RADIATION	70	-0.289215	-1.06295	0.347763	0.726415	1	5090	tags=30%, list=23%, signal=39%
YANG_BCL3_TARGETS_DN	6	-0.519787	-1.06266	0.427239	0.72667	1	3733	tags=50%, list=17%, signal=60%
STEARMAN_LUNG_CANCER_EARLY_VS_LATE_UP	99	-0.273861	-1.06234	0.351852	0.726972	1	8573	tags=42%, list=39%, signal=69%
IM_SREBF1A_TARGETS	5	-0.539743	-1.06216	0.409836	0.726861	1	7543	tags=60%, list=34%, signal=92%
ZHAN_MULTIPLE_MYELOMA_CD1_AND_CD2_UP	61	-0.295546	-1.06141	0.336874	0.728521	1	6561	tags=38%, list=30%, signal=54%
PEDRIOLI_MIR31_TARGETS_UP	126	-0.26435	-1.06119	0.335645	0.728554	1	4545	tags=29%, list=21%, signal=36%
REICHERT_MITOSIS_LIN9_TARGETS	22	-0.37213	-1.06089	0.37799	0.728857	1	7445	tags=41%, list=34%, signal=62%
RICKMAN_HEAD_AND_NECK_CANCER_B	31	-0.343941	-1.06038	0.405063	0.729788	1	2668	tags=26%, list=12%, signal=29%
WUNDER_INFLAMMATORY_RESPONSE_AND_CHOLESTEROL_UP	36	-0.325697	-1.06037	0.38871	0.729121	1	1882	tags=17%, list=9%, signal=18%
YANG_BREAST_CANCER_ESR1_LASER_UP	25	-0.354347	-1.06008	0.390651	0.72936	1	6060	tags=44%, list=28%, signal=61%
LE_EGR2_TARGETS_DN	98	-0.272346	-1.05956	0.349788	0.730329	1	3858	tags=26%, list=18%, signal=31%
CHARAFE_BREAST_CANCER_LUMINAL_VS_MESENCHYMAL_DN	365	-0.233207	-1.05947	0.307601	0.729941	1	4003	tags=20%, list=18%, signal=24%
HOFMANN_MYELODYSPLASTIC_SYNDROM_HIGH_RISK_UP	10	-0.445752	-1.05941	0.389338	0.729418	1	4313	tags=30%, list=20%, signal=37%
IRITANI_MAD1_TARGETS_UP	11	-0.437715	-1.0593	0.387792	0.729063	1	7193	tags=73%, list=33%, signal=108%
WANG_RECURRENT_LIVER_CANCER_UP	16	-0.406127	-1.05915	0.393388	0.728843	1	8337	tags=56%, list=38%, signal=91%
HOLLEMAN_DAUNORUBICIN_B_ALL_UP	8	-0.482563	-1.0591	0.417122	0.728331	1	1823	tags=25%, list=8%, signal=27%
FONTAINE_PAPILLARY_THYROID_CARCINOMA_UP	50	-0.30536	-1.0589	0.364329	0.728281	1	3709	tags=20%, list=17%, signal=24%
ROZANOV_MMP14_TARGETS_SUBSET	31	-0.334071	-1.05886	0.354735	0.727711	1	4661	tags=35%, list=21%, signal=45%
SCHAEFFER_PROSTATE_DEVELOPMENT_6HR_DN	405	-0.232241	-1.05886	0.301887	0.727027	1	6798	tags=28%, list=31%, signal=40%
DURCHDEWALD_SKIN_CARCINOGENESIS_DN	210	-0.245898	-1.05832	0.325729	0.728003	1	7479	tags=40%, list=34%, signal=60%
PEREZ_TP63_TARGETS	266	-0.2409	-1.05767	0.32125	0.729458	1	4243	tags=21%, list=19%, signal=26%
BLALOCK_ALZHEIMERS_DISEASE_INCIPIENT_UP	308	-0.23713	-1.05754	0.308252	0.72917	1	4856	tags=24%, list=22%, signal=31%
TONKS_TARGETS_OF_RUNX1_RUNX1T1_FUSION_GRANULOCYTE_DN	14	-0.407768	-1.05741	0.406302	0.728893	1	6317	tags=50%, list=29%, signal=70%
SCHLOSSER_SERUM_RESPONSE_UP	103	-0.268582	-1.05728	0.333333	0.728642	1	8432	tags=43%, list=39%, signal=69%
DER_IFN_GAMMA_RESPONSE_UP	61	-0.289502	-1.05727	0.356509	0.727977	1	3667	tags=21%, list=17%, signal=26%
JIANG_AGING_CEREBRAL_CORTEX_UP	32	-0.338938	-1.0571	0.369355	0.727849	1	1885	tags=13%, list=9%, signal=14%
ROVERSI_GLIOMA_COPY_NUMBER_DN	44	-0.313882	-1.05699	0.360738	0.727478	1	3277	tags=25%, list=15%, signal=29%
KUROKAWA_LIVER_CANCER_CHEMOTHERAPY_UP	8	-0.470886	-1.05651	0.382716	0.728329	1	3748	tags=38%, list=17%, signal=45%
MCBRYAN_PUBERTAL_TGFB1_TARGETS_DN	60	-0.296149	-1.05646	0.384962	0.727821	1	4575	tags=23%, list=21%, signal=29%
DAIRKEE_TERT_TARGETS_DN	82	-0.281073	-1.05628	0.353372	0.72768	1	2869	tags=16%, list=13%, signal=18%
CUI_TCF21_TARGETS_2_UP	341	-0.23455	-1.05604	0.330855	0.727759	1	3684	tags=20%, list=17%, signal=23%
ACOSTA_PROLIFERATION_INDEPENDENT_MYC_TARGETS_DN	94	-0.271511	-1.05552	0.355167	0.728767	1	3564	tags=20%, list=16%, signal=24%
WAKABAYASHI_ADIPOGENESIS_PPARG_RXRA_BOUND_WITH_H4K20ME1_MARK	107	-0.268909	-1.05526	0.346099	0.72889	1	5504	tags=25%, list=25%, signal=34%
DAVICIONI_RHABDOMYOSARCOMA_PAX_FOXO1_FUSION_UP	52	-0.299195	-1.05462	0.374224	0.730193	1	2636	tags=19%, list=12%, signal=22%
BOYAULT_LIVER_CANCER_SUBCLASS_G2	23	-0.35616	-1.05442	0.383224	0.730137	1	288	tags=9%, list=1%, signal=9%
MAINA_VHL_TARGETS_DN	15	-0.392442	-1.05411	0.400657	0.730444	1	2525	tags=27%, list=12%, signal=30%
WAKABAYASHI_ADIPOGENESIS_PPARG_BOUND_36HR	26	-0.348569	-1.05408	0.404088	0.729871	1	3164	tags=19%, list=14%, signal=22%
OHM_EMBRYONIC_CARCINOMA_UP	6	-0.519433	-1.0538	0.424242	0.730046	1	921	tags=17%, list=4%, signal=17%
WALLACE_PROSTATE_CANCER_UP	17	-0.381581	-1.05346	0.402827	0.730482	1	632	tags=12%, list=3%, signal=12%
BREDEMEYER_RAG_SIGNALING_NOT_VIA_ATM_DN	48	-0.309889	-1.05327	0.371248	0.730425	1	3371	tags=21%, list=15%, signal=25%
PEREZ_TP53_AND_TP63_TARGETS	164	-0.251654	-1.05285	0.351573	0.731091	1	3237	tags=16%, list=15%, signal=19%
WIEDERSCHAIN_TARGETS_OF_BMI1_AND_PCGF2	46	-0.310253	-1.05172	0.375389	0.734007	1	2630	tags=22%, list=12%, signal=25%
TSAI_RESPONSE_TO_RADIATION_THERAPY	25	-0.355249	-1.05076	0.391517	0.73633	1	3343	tags=32%, list=15%, signal=38%
FERRANDO_HOX11_NEIGHBORS	18	-0.384373	-1.05062	0.389338	0.736072	1	1611	tags=11%, list=7%, signal=12%
SHETH_LIVER_CANCER_VS_TXNIP_LOSS_PAM1	193	-0.248577	-1.0506	0.367429	0.735448	1	2906	tags=16%, list=13%, signal=18%
LIANG_SILENCED_BY_METHYLATION_UP	23	-0.358356	-1.05057	0.389171	0.734839	1	2727	tags=30%, list=12%, signal=35%
JECHLINGER_EPITHELIAL_TO_MESENCHYMAL_TRANSITION_DN	57	-0.295027	-1.04921	0.391502	0.738541	1	1784	tags=11%, list=8%, signal=11%
MIKKELSEN_ES_ICP_WITH_H3K4ME3_AND_H3K27ME3	108	-0.268181	-1.04885	0.357043	0.738964	1	4963	tags=35%, list=23%, signal=45%
BILANGES_RAPAMYCIN_SENSITIVE_VIA_TSC1_AND_TSC2	53	-0.292437	-1.04869	0.38162	0.738818	1	2435	tags=11%, list=11%, signal=13%
WIKMAN_ASBESTOS_LUNG_CANCER_DN	22	-0.360146	-1.04841	0.373083	0.73901	1	4570	tags=32%, list=21%, signal=40%
HUMMERICH_BENIGN_SKIN_TUMOR_DN	17	-0.387557	-1.04812	0.401695	0.739238	1	3270	tags=35%, list=15%, signal=41%
SANSOM_WNT_PATHWAY_REQUIRE_MYC	56	-0.293965	-1.04733	0.376682	0.741023	1	4257	tags=25%, list=19%, signal=31%
CHIARADONNA_NEOPLASTIC_TRANSFORMATION_CDC25_DN	140	-0.255284	-1.04709	0.360544	0.741067	1	3596	tags=22%, list=16%, signal=26%
WENG_POR_TARGETS_GLOBAL_UP	17	-0.380053	-1.04617	0.395623	0.743328	1	1467	tags=24%, list=7%, signal=25%
MATZUK_CENTRAL_FOR_FEMALE_FERTILITY	26	-0.345493	-1.04553	0.404959	0.744696	1	4194	tags=27%, list=19%, signal=33%
GARGALOVIC_RESPONSE_TO_OXIDIZED_PHOSPHOLIPIDS_YELLOW_UP	20	-0.364431	-1.0452	0.404722	0.745036	1	5149	tags=35%, list=24%, signal=46%
NADLER_OBESITY_DN	46	-0.304477	-1.04517	0.382812	0.744421	1	5903	tags=35%, list=27%, signal=48%
SHAFFER_IRF4_MULTIPLE_MYELOMA_PROGRAM	35	-0.322107	-1.04512	0.407936	0.743895	1	2318	tags=17%, list=11%, signal=19%
LI_WILMS_TUMOR_VS_FETAL_KIDNEY_2_DN	48	-0.300447	-1.04476	0.365297	0.744366	1	3271	tags=23%, list=15%, signal=27%
HOLLEMAN_VINCRISTINE_RESISTANCE_ALL_DN	16	-0.391577	-1.04471	0.397373	0.743862	1	746	tags=6%, list=3%, signal=6%
XU_RESPONSE_TO_TRETINOIN_AND_NSC682994_UP	15	-0.405807	-1.04412	0.424749	0.745044	1	3254	tags=27%, list=15%, signal=31%
BROWNE_HCMV_INFECTION_12HR_UP	81	-0.281139	-1.04394	0.3739	0.744967	1	6141	tags=33%, list=28%, signal=46%
MARTINEZ_RB1_AND_TP53_TARGETS_UP	503	-0.225218	-1.04384	0.339306	0.744589	1	4895	tags=24%, list=22%, signal=31%
XU_GH1_AUTOCRINE_TARGETS_UP	168	-0.251266	-1.04354	0.377158	0.744871	1	6037	tags=33%, list=28%, signal=45%
ONO_FOXP3_TARGETS_DN	38	-0.317834	-1.04286	0.397083	0.746364	1	3039	tags=26%, list=14%, signal=31%
VALK_AML_CLUSTER_2	24	-0.355289	-1.04279	0.415712	0.745908	1	1640	tags=17%, list=7%, signal=18%
NIELSEN_GIST_AND_SYNOVIAL_SARCOMA_UP	19	-0.369838	-1.04239	0.39094	0.746509	1	7046	tags=58%, list=32%, signal=85%
ZHOU_INFLAMMATORY_RESPONSE_LIVE_DN	253	-0.236717	-1.04235	0.36	0.745959	1	6299	tags=34%, list=29%, signal=47%
PIEPOLI_LGI1_TARGETS_DN	10	-0.446256	-1.04218	0.414966	0.745826	1	2997	tags=40%, list=14%, signal=46%
CHENG_IMPRINTED_BY_ESTRADIOL	73	-0.281967	-1.04175	0.403983	0.746479	1	3551	tags=23%, list=16%, signal=28%
CHEN_NEUROBLASTOMA_COPY_NUMBER_GAINS	41	-0.317079	-1.04151	0.393082	0.746579	1	4250	tags=29%, list=19%, signal=36%
TERAMOTO_OPN_TARGETS_CLUSTER_4	9	-0.46376	-1.04097	0.437075	0.747627	1	3138	tags=44%, list=14%, signal=52%
PASINI_SUZ12_TARGETS_UP	91	-0.269421	-1.04086	0.389758	0.747314	1	5922	tags=37%, list=27%, signal=51%
DARWICHE_SKIN_TUMOR_PROMOTER_DN	125	-0.258158	-1.03944	0.398892	0.751138	1	3035	tags=17%, list=14%, signal=19%
TSUNODA_CISPLATIN_RESISTANCE_UP	14	-0.405795	-1.0392	0.408772	0.751243	1	6099	tags=64%, list=28%, signal=89%
MATZUK_FERTILIZATION	8	-0.469997	-1.03892	0.438261	0.751445	1	5165	tags=38%, list=24%, signal=49%
LU_AGING_BRAIN_DN	130	-0.255828	-1.03856	0.385816	0.751891	1	4346	tags=21%, list=20%, signal=26%
BAELDE_DIABETIC_NEPHROPATHY_DN	378	-0.229829	-1.03832	0.35006	0.751981	1	5818	tags=26%, list=27%, signal=35%
GARY_CD5_TARGETS_UP	394	-0.227972	-1.03781	0.353293	0.752879	1	4842	tags=26%, list=22%, signal=32%
DAVICIONI_TARGETS_OF_PAX_FOXO1_FUSIONS_DN	58	-0.294054	-1.03756	0.377099	0.752947	1	3573	tags=24%, list=16%, signal=29%
SHARMA_PILOCYTIC_ASTROCYTOMA_LOCATION_DN	5	-0.538763	-1.03708	0.446296	0.75378	1	8951	tags=80%, list=41%, signal=135%
MARIADASON_RESPONSE_TO_BUTYRATE_CURCUMIN_SULINDAC_TSA_1	7	-0.49671	-1.03685	0.411661	0.75385	1	11022	tags=100%, list=50%, signal=201%
ISSAEVA_MLL2_TARGETS	54	-0.296676	-1.03683	0.393027	0.753219	1	5439	tags=44%, list=25%, signal=59%
RUAN_RESPONSE_TO_TROGLITAZONE_DN	19	-0.373451	-1.03591	0.406302	0.755518	1	3573	tags=32%, list=16%, signal=38%
GROSS_ELK3_TARGETS_UP	25	-0.353941	-1.03587	0.426966	0.754972	1	6180	tags=44%, list=28%, signal=61%
VANLOO_SP3_TARGETS_DN	74	-0.278499	-1.03581	0.401773	0.754483	1	4991	tags=32%, list=23%, signal=42%
MIKKELSEN_DEDIFFERENTIATED_STATE_DN	6	-0.513739	-1.03564	0.449912	0.754345	1	9075	tags=83%, list=41%, signal=142%
ODONNELL_TFRC_TARGETS_UP	284	-0.234054	-1.03557	0.370927	0.753876	1	4902	tags=24%, list=22%, signal=31%
LI_ADIPOGENESIS_BY_ACTIVATED_PPARG	16	-0.393925	-1.03551	0.398693	0.753443	1	6354	tags=38%, list=29%, signal=53%
SENESE_HDAC1_TARGETS_DN	179	-0.247778	-1.03504	0.397039	0.754184	1	5540	tags=32%, list=25%, signal=43%
MCBRYAN_PUBERTAL_BREAST_4_5WK_DN	163	-0.248878	-1.03471	0.391892	0.754596	1	2935	tags=16%, list=13%, signal=18%
HUMMEL_BURKITTS_LYMPHOMA_UP	33	-0.324805	-1.03464	0.433871	0.754145	1	3126	tags=21%, list=14%, signal=25%
GAUSSMANN_MLL_AF4_FUSION_TARGETS_A_UP	151	-0.250736	-1.03364	0.399718	0.756665	1	2478	tags=15%, list=11%, signal=17%
GAUSSMANN_MLL_AF4_FUSION_TARGETS_G_UP	171	-0.25014	-1.03337	0.380263	0.756859	1	5568	tags=29%, list=25%, signal=39%
LIN_TUMOR_ESCAPE_FROM_IMMUNE_ATTACK	15	-0.401504	-1.03314	0.410256	0.756916	1	3680	tags=40%, list=17%, signal=48%
LAIHO_COLORECTAL_CANCER_SERRATED_DN	61	-0.288607	-1.03303	0.421851	0.756614	1	8640	tags=51%, list=39%, signal=84%
NIKOLSKY_BREAST_CANCER_7Q21_Q22_AMPLICON	50	-0.294355	-1.03288	0.403101	0.756363	1	5539	tags=32%, list=25%, signal=43%
MCBRYAN_PUBERTAL_BREAST_6_7WK_UP	165	-0.244308	-1.0327	0.392761	0.756293	1	8116	tags=41%, list=37%, signal=64%
LI_WILMS_TUMOR_VS_FETAL_KIDNEY_2_UP	28	-0.328489	-1.03191	0.415361	0.758109	1	4888	tags=32%, list=22%, signal=41%
BENPORATH_NOS_TARGETS	143	-0.25126	-1.03102	0.391892	0.76022	1	6144	tags=34%, list=28%, signal=46%
GUTIERREZ_WALDENSTROEMS_MACROGLOBULINEMIA_1_UP	9	-0.44775	-1.03072	0.433735	0.760508	1	1753	tags=33%, list=8%, signal=36%
CORRE_MULTIPLE_MYELOMA_UP	55	-0.292633	-1.03036	0.391502	0.760959	1	1120	tags=15%, list=5%, signal=15%
FLECHNER_BIOPSY_KIDNEY_TRANSPLANT_OK_VS_DONOR_UP	447	-0.223557	-1.03014	0.382456	0.760981	1	5955	tags=24%, list=27%, signal=32%
IVANOVA_HEMATOPOIESIS_STEM_CELL_AND_PROGENITOR	488	-0.223707	-1.02979	0.397451	0.761366	1	3805	tags=19%, list=17%, signal=22%
PEREZ_TP53_TARGETS	732	-0.217776	-1.02961	0.371555	0.761266	1	3039	tags=15%, list=14%, signal=17%
THILLAINADESAN_ZNF217_TARGETS_UP	34	-0.32388	-1.02928	0.412873	0.761598	1	5630	tags=29%, list=26%, signal=40%
WANG_BARRETTS_ESOPHAGUS_UP	42	-0.309646	-1.02928	0.432558	0.760945	1	3573	tags=29%, list=16%, signal=34%
MAHADEVAN_GIST_MORPHOLOGICAL_SWITCH	15	-0.392489	-1.02839	0.434122	0.76308	1	2688	tags=33%, list=12%, signal=38%
DAZARD_UV_RESPONSE_CLUSTER_G6	117	-0.260815	-1.02825	0.405817	0.762872	1	6605	tags=33%, list=30%, signal=47%
STEIN_ESRRA_TARGETS_UP	297	-0.232209	-1.02814	0.386139	0.762534	1	6248	tags=27%, list=29%, signal=37%
LEE_LIVER_CANCER_HEPATOBLAST	12	-0.414258	-1.02774	0.412698	0.763061	1	3365	tags=33%, list=15%, signal=39%
GHO_ATF5_TARGETS_UP	9	-0.453683	-1.02636	0.451389	0.76676	1	3260	tags=33%, list=15%, signal=39%
YAUCH_HEDGEHOG_SIGNALING_PARACRINE_UP	115	-0.257746	-1.02521	0.415654	0.769675	1	4282	tags=23%, list=20%, signal=29%
TONKS_TARGETS_OF_RUNX1_RUNX1T1_FUSION_SUSTAINED_IN_MONOCYTE_DN	6	-0.503363	-1.02457	0.433155	0.770984	1	5724	tags=67%, list=26%, signal=90%
DARWICHE_PAPILLOMA_RISK_HIGH_DN	127	-0.254755	-1.02451	0.416552	0.770487	1	6220	tags=31%, list=28%, signal=43%
PARENT_MTOR_SIGNALING_UP	437	-0.222216	-1.02439	0.39489	0.770187	1	5056	tags=22%, list=23%, signal=29%
BURTON_ADIPOGENESIS_8	77	-0.276394	-1.0243	0.431784	0.769761	1	6370	tags=32%, list=29%, signal=46%
MOREAUX_B_LYMPHOCYTE_MATURATION_BY_TACI_UP	67	-0.27702	-1.02382	0.416413	0.770548	1	2260	tags=15%, list=10%, signal=17%
MEISSNER_BRAIN_HCP_WITH_H3K4ME2_AND_H3K27ME3	47	-0.299234	-1.02362	0.427683	0.770483	1	4434	tags=30%, list=20%, signal=37%
YAUCH_HEDGEHOG_SIGNALING_PARACRINE_DN	197	-0.239785	-1.02318	0.412	0.771237	1	2701	tags=16%, list=12%, signal=18%
FARMER_BREAST_CANCER_BASAL_VS_LULMINAL	264	-0.231319	-1.02274	0.394437	0.771946	1	3869	tags=18%, list=18%, signal=22%
WU_HBX_TARGETS_3_UP	16	-0.383531	-1.02273	0.43686	0.771315	1	2807	tags=19%, list=13%, signal=21%
LUCAS_HNF4A_TARGETS_DN	6	-0.496116	-1.0226	0.450435	0.771059	1	3471	tags=50%, list=16%, signal=59%
VIETOR_IFRD1_TARGETS	19	-0.363923	-1.02223	0.428331	0.771552	1	2219	tags=16%, list=10%, signal=18%
NIELSEN_LEIOMYOSARCOMA_DN	13	-0.400159	-1.02178	0.427817	0.77228	1	5740	tags=38%, list=26%, signal=52%
OKUMURA_INFLAMMATORY_RESPONSE_LPS	144	-0.250663	-1.02118	0.42462	0.773432	1	5718	tags=32%, list=26%, signal=43%
HADDAD_T_LYMPHOCYTE_AND_NK_PROGENITOR_DN	55	-0.291295	-1.02092	0.422323	0.773582	1	5925	tags=38%, list=27%, signal=52%
FRASOR_RESPONSE_TO_ESTRADIOL_UP	34	-0.323583	-1.02081	0.429688	0.773195	1	2935	tags=18%, list=13%, signal=20%
ACEVEDO_LIVER_CANCER_WITH_H3K27ME3_UP	185	-0.241309	-1.01945	0.422164	0.776859	1	4024	tags=24%, list=18%, signal=29%
DEBIASI_APOPTOSIS_BY_REOVIRUS_INFECTION_DN	238	-0.231674	-1.01911	0.423177	0.777235	1	4364	tags=21%, list=20%, signal=25%
BURTON_ADIPOGENESIS_7	46	-0.298935	-1.01807	0.442786	0.779827	1	6133	tags=28%, list=28%, signal=39%
MIKKELSEN_IPS_ICP_WITH_H3K4ME3_AND_H327ME3	94	-0.265639	-1.01627	0.42616	0.784705	1	3389	tags=23%, list=15%, signal=28%
MASSARWEH_TAMOXIFEN_RESISTANCE_UP	411	-0.220839	-1.01494	0.442775	0.788274	1	4966	tags=23%, list=23%, signal=29%
BUSA_SAM68_TARGETS_DN	6	-0.495139	-1.01466	0.466549	0.78851	1	2993	tags=33%, list=14%, signal=39%
TESAR_ALK_TARGETS_HUMAN_ES_5D_DN	7	-0.473101	-1.01383	0.455806	0.790415	1	5441	tags=43%, list=25%, signal=57%
IVANOVA_HEMATOPOIESIS_MATURE_CELL	214	-0.233083	-1.01375	0.427441	0.789963	1	5966	tags=31%, list=27%, signal=42%
SASSON_RESPONSE_TO_FORSKOLIN_DN	78	-0.270801	-1.01346	0.434586	0.790163	1	6979	tags=35%, list=32%, signal=51%
SATO_SILENCED_BY_METHYLATION_IN_PANCREATIC_CANCER_1	314	-0.22635	-1.01337	0.443636	0.789774	1	4827	tags=29%, list=22%, signal=36%
STEINER_ERYTHROCYTE_MEMBRANE_GENES	10	-0.427475	-1.01315	0.438775	0.789779	1	4003	tags=30%, list=18%, signal=37%
MATTIOLI_MULTIPLE_MYELOMA_WITH_14Q32_TRANSLOCATIONS	35	-0.317421	-1.01304	0.441498	0.789465	1	2636	tags=20%, list=12%, signal=23%
MIKKELSEN_NPC_HCP_WITH_H3K27ME3	279	-0.228971	-1.01291	0.428397	0.789185	1	4337	tags=25%, list=20%, signal=30%
VANDESLUIS_NORMAL_EMBRYOS_DN	18	-0.371027	-1.01268	0.445	0.789182	1	3886	tags=33%, list=18%, signal=40%
SASAKI_ADULT_T_CELL_LEUKEMIA	146	-0.247844	-1.01266	0.4278	0.788585	1	5732	tags=27%, list=26%, signal=36%
ONKEN_UVEAL_MELANOMA_DN	427	-0.220597	-1.01232	0.427902	0.788977	1	6846	tags=27%, list=31%, signal=39%
PAPASPYRIDONOS_UNSTABLE_ATEROSCLEROTIC_PLAQUE_UP	40	-0.30671	-1.01219	0.454824	0.788721	1	7654	tags=40%, list=35%, signal=61%
BONOME_OVARIAN_CANCER_SURVIVAL_SUBOPTIMAL_DEBULKING	404	-0.222686	-1.01175	0.422986	0.78945	1	4077	tags=19%, list=19%, signal=23%
HAHTOLA_SEZARY_SYNDROM_UP	80	-0.270101	-1.01155	0.4757	0.789379	1	388	tags=6%, list=2%, signal=6%
HAN_SATB1_TARGETS_UP	300	-0.227888	-1.01111	0.413151	0.790171	1	3751	tags=20%, list=17%, signal=23%
SHEN_SMARCA2_TARGETS_UP	323	-0.225627	-1.0105	0.439708	0.791335	1	8545	tags=40%, list=39%, signal=64%
WAKABAYASHI_ADIPOGENESIS_PPARG_BOUND_8D	528	-0.216516	-1.01007	0.439462	0.791991	1	4216	tags=19%, list=19%, signal=22%
BOYLAN_MULTIPLE_MYELOMA_C_DN	42	-0.303473	-1.00998	0.446741	0.7916	1	1701	tags=12%, list=8%, signal=13%
ZHONG_SECRETOME_OF_LUNG_CANCER_AND_FIBROBLAST	113	-0.252945	-1.00961	0.447188	0.79212	1	2710	tags=12%, list=12%, signal=14%
DELASERNA_MYOD_TARGETS_UP	78	-0.265985	-1.00942	0.428571	0.792043	1	4410	tags=27%, list=20%, signal=34%
RUTELLA_RESPONSE_TO_CSF2RB_AND_IL4_UP	274	-0.228904	-1.00887	0.449564	0.793071	1	5122	tags=25%, list=23%, signal=32%
KOYAMA_SEMA3B_TARGETS_UP	203	-0.233523	-1.00858	0.435279	0.793348	1	4870	tags=24%, list=22%, signal=30%
CAIRO_HEPATOBLASTOMA_UP	169	-0.241324	-1.00701	0.429894	0.797618	1	2783	tags=14%, list=13%, signal=16%
WIERENGA_STAT5A_TARGETS_GROUP2	46	-0.291613	-1.00673	0.479876	0.797818	1	1104	tags=15%, list=5%, signal=16%
PARK_HSC_AND_MULTIPOTENT_PROGENITORS	43	-0.302554	-1.00645	0.460389	0.798006	1	2562	tags=9%, list=12%, signal=11%
MORI_SMALL_PRE_BII_LYMPHOCYTE_DN	65	-0.275676	-1.00637	0.448062	0.797605	1	5041	tags=29%, list=23%, signal=38%
GUTIERREZ_MULTIPLE_MYELOMA_DN	29	-0.322717	-1.00636	0.464407	0.796933	1	634	tags=7%, list=3%, signal=7%
KYNG_WERNER_SYNDROM_AND_NORMAL_AGING_DN	172	-0.241575	-1.00601	0.456954	0.797429	1	5501	tags=26%, list=25%, signal=34%
AMUNDSON_GAMMA_RADIATION_RESPONSE	36	-0.311326	-1.00596	0.426689	0.796925	1	6414	tags=25%, list=29%, signal=35%
LOPEZ_MBD_TARGETS_IMPRINTED_AND_X_LINKED	14	-0.396565	-1.00574	0.45583	0.796913	1	6604	tags=43%, list=30%, signal=61%
WANG_RESPONSE_TO_ANDROGEN_UP	24	-0.341791	-1.00572	0.449206	0.796318	1	2234	tags=13%, list=10%, signal=14%
PARK_HSC_MARKERS	37	-0.311213	-1.0057	0.446372	0.795731	1	8113	tags=51%, list=37%, signal=81%
MIKKELSEN_MEF_HCP_WITH_H3K27ME3	474	-0.216421	-1.00509	0.444314	0.797006	1	4137	tags=23%, list=19%, signal=28%
MULLIGHAN_MLL_SIGNATURE_1_UP	299	-0.22477	-1.00445	0.440298	0.798338	1	5847	tags=27%, list=27%, signal=36%
KOBAYASHI_EGFR_SIGNALING_6HR_DN	17	-0.3661	-1.00337	0.435764	0.801004	1	3570	tags=24%, list=16%, signal=28%
LIANG_SILENCED_BY_METHYLATION_2	42	-0.302817	-1.00309	0.453005	0.801187	1	4951	tags=33%, list=23%, signal=43%
HANN_RESISTANCE_TO_BCL2_INHIBITOR_UP	28	-0.329397	-1.00271	0.456628	0.801701	1	2826	tags=25%, list=13%, signal=29%
WINTER_HYPOXIA_METAGENE	194	-0.232473	-1.00215	0.467721	0.802779	1	3882	tags=22%, list=18%, signal=26%
KANG_DOXORUBICIN_RESISTANCE_DN	16	-0.372875	-1.00148	0.458844	0.804117	1	6388	tags=38%, list=29%, signal=53%
ZUCCHI_METASTASIS_UP	34	-0.313135	-1.00143	0.449456	0.8036	1	3564	tags=26%, list=16%, signal=32%
WANG_TNF_TARGETS	22	-0.345113	-1.00116	0.449744	0.803791	1	3813	tags=32%, list=17%, signal=38%
HERNANDEZ_MITOTIC_ARREST_BY_DOCETAXEL_2_UP	50	-0.293144	-1.00049	0.465544	0.805187	1	3755	tags=26%, list=17%, signal=31%
SMIRNOV_CIRCULATING_ENDOTHELIOCYTES_IN_CANCER_UP	134	-0.247596	-0.999925	0.440443	0.806283	1	4956	tags=25%, list=23%, signal=33%
JU_AGING_TERC_TARGETS_DN	5	-0.519131	-0.999832	0.517691	0.805922	1	6219	tags=60%, list=28%, signal=84%
WILLIAMS_ESR2_TARGETS_UP	24	-0.341831	-0.999718	0.479798	0.805628	1	1564	tags=17%, list=7%, signal=18%
KAAB_HEART_ATRIUM_VS_VENTRICLE_DN	217	-0.230905	-0.998664	0.465879	0.808183	1	4723	tags=21%, list=22%, signal=26%
BACOLOD_RESISTANCE_TO_ALKYLATING_AGENTS_DN	48	-0.290199	-0.998502	0.452096	0.80804	1	4186	tags=23%, list=19%, signal=28%
LINDGREN_BLADDER_CANCER_CLUSTER_3_DN	173	-0.237912	-0.998484	0.453678	0.80743	1	2842	tags=16%, list=13%, signal=18%
IGARASHI_ATF4_TARGETS_DN	69	-0.272404	-0.998368	0.449635	0.807119	1	4508	tags=28%, list=21%, signal=35%
WANG_LSD1_TARGETS_DN	36	-0.30477	-0.998266	0.470588	0.806741	1	593	tags=14%, list=3%, signal=14%
THEILGAARD_NEUTROPHIL_AT_SKIN_WOUND_DN	192	-0.233998	-0.997946	0.474774	0.807036	1	5582	tags=23%, list=25%, signal=31%
AFFAR_YY1_TARGETS_DN	211	-0.229864	-0.997861	0.469755	0.806627	1	4709	tags=21%, list=22%, signal=27%
CAVARD_LIVER_CANCER_MALIGNANT_VS_BENIGN	25	-0.334636	-0.997828	0.462046	0.806074	1	4539	tags=28%, list=21%, signal=35%
TENEDINI_MEGAKARYOCYTE_MARKERS	56	-0.284284	-0.99763	0.44613	0.806003	1	6414	tags=41%, list=29%, signal=58%
KIM_MYCN_AMPLIFICATION_TARGETS_UP	73	-0.275425	-0.9975	0.478852	0.805767	1	2965	tags=19%, list=14%, signal=22%
BECKER_TAMOXIFEN_RESISTANCE_DN	45	-0.295068	-0.997166	0.450704	0.806126	1	2371	tags=16%, list=11%, signal=17%
CHIARADONNA_NEOPLASTIC_TRANSFORMATION_CDC25_UP	102	-0.256498	-0.99709	0.430769	0.805691	1	6485	tags=34%, list=30%, signal=49%
MIKKELSEN_IPS_ICP_WITH_H3K27ME3	42	-0.301005	-0.997022	0.470229	0.805232	1	4717	tags=33%, list=22%, signal=42%
BILANGES_SERUM_SENSITIVE_VIA_TSC2	27	-0.326551	-0.996411	0.486134	0.806438	1	5836	tags=37%, list=27%, signal=50%
MASSARWEH_TAMOXIFEN_RESISTANCE_DN	182	-0.236109	-0.995959	0.480795	0.807153	1	3794	tags=20%, list=17%, signal=24%
SCHLESINGER_H3K27ME3_IN_NORMAL_AND_METHYLATED_IN_CANCER	22	-0.341007	-0.995694	0.476744	0.807336	1	3707	tags=27%, list=17%, signal=33%
NAKAJIMA_EOSINOPHIL	24	-0.333751	-0.995012	0.451299	0.808784	1	4817	tags=38%, list=22%, signal=48%
KENNY_CTNNB1_TARGETS_UP	39	-0.301325	-0.994772	0.463722	0.808845	1	4019	tags=26%, list=18%, signal=31%
LUCAS_HNF4A_TARGETS_UP	48	-0.288741	-0.994471	0.465116	0.80911	1	6011	tags=31%, list=27%, signal=43%
SILIGAN_BOUND_BY_EWS_FLT1_FUSION	37	-0.308261	-0.993985	0.458136	0.809924	1	4407	tags=32%, list=20%, signal=41%
VART_KSHV_INFECTION_ANGIOGENIC_MARKERS_DN	125	-0.248766	-0.993716	0.462912	0.810103	1	4739	tags=27%, list=22%, signal=35%
FARMER_BREAST_CANCER_APOCRINE_VS_LUMINAL	258	-0.225093	-0.993542	0.483313	0.809946	1	3675	tags=19%, list=17%, signal=23%
BRUECKNER_TARGETS_OF_MIRLET7A3_UP	90	-0.260245	-0.992779	0.484805	0.811685	1	4569	tags=24%, list=21%, signal=31%
JAATINEN_HEMATOPOIETIC_STEM_CELL_DN	162	-0.236959	-0.992713	0.502098	0.811231	1	5974	tags=35%, list=27%, signal=48%
MARSHALL_VIRAL_INFECTION_RESPONSE_DN	25	-0.332078	-0.992292	0.461921	0.811815	1	5314	tags=28%, list=24%, signal=37%
MULLIGHAN_MLL_SIGNATURE_2_DN	223	-0.23176	-0.992061	0.485	0.811868	1	3474	tags=18%, list=16%, signal=21%
WANG_RESPONSE_TO_BEXAROTENE_DN	25	-0.338691	-0.991888	0.485904	0.811741	1	3227	tags=36%, list=15%, signal=42%
FERRANDO_TAL1_NEIGHBORS	16	-0.377746	-0.990919	0.477352	0.814017	1	4452	tags=31%, list=20%, signal=39%
WEBER_METHYLATED_HCP_IN_FIBROBLAST_DN	29	-0.315617	-0.990369	0.483721	0.815038	1	357	tags=10%, list=2%, signal=11%
WILSON_PROTEASES_AT_TUMOR_BONE_INTERFACE_UP	21	-0.344513	-0.990314	0.476033	0.814546	1	5650	tags=43%, list=26%, signal=58%
LANDIS_ERBB2_BREAST_PRENEOPLASTIC_DN	49	-0.282937	-0.990271	0.477519	0.814019	1	5509	tags=35%, list=25%, signal=46%
BILBAN_B_CLL_LPL_DN	29	-0.323063	-0.990138	0.479233	0.813764	1	3573	tags=21%, list=16%, signal=25%
WEBER_METHYLATED_ICP_IN_SPERM_DN	10	-0.411883	-0.989858	0.490066	0.813961	1	743	tags=20%, list=3%, signal=21%
ZHAN_MULTIPLE_MYELOMA_MF_DN	29	-0.324662	-0.989837	0.464968	0.813367	1	6422	tags=45%, list=29%, signal=63%
JOHNSTONE_PARVB_TARGETS_3_UP	329	-0.222338	-0.989337	0.47543	0.814232	1	5565	tags=25%, list=25%, signal=33%
HINATA_NFKB_TARGETS_FIBROBLAST_UP	73	-0.265188	-0.988689	0.486804	0.815583	1	3093	tags=21%, list=14%, signal=24%
HEIDENBLAD_AMPLICON_8Q24_DN	36	-0.303819	-0.988327	0.491961	0.816036	1	1714	tags=14%, list=8%, signal=15%
JAATINEN_HEMATOPOIETIC_STEM_CELL_UP	228	-0.228934	-0.988271	0.510911	0.815565	1	3739	tags=19%, list=17%, signal=23%
BERENJENO_ROCK_SIGNALING_NOT_VIA_RHOA_UP	26	-0.323507	-0.988021	0.499162	0.815691	1	1513	tags=19%, list=7%, signal=21%
ZHANG_BREAST_CANCER_PROGENITORS_DN	121	-0.247344	-0.987107	0.480742	0.81777	1	5555	tags=30%, list=25%, signal=40%
SWEET_KRAS_ONCOGENIC_SIGNATURE	73	-0.266407	-0.986838	0.480655	0.817926	1	8558	tags=45%, list=39%, signal=74%
SHARMA_PILOCYTIC_ASTROCYTOMA_LOCATION_UP	19	-0.354148	-0.986677	0.494176	0.817729	1	2439	tags=26%, list=11%, signal=30%
MOREAUX_MULTIPLE_MYELOMA_BY_TACI_UP	311	-0.223845	-0.985591	0.47896	0.820423	1	5157	tags=27%, list=24%, signal=35%
MCDOWELL_ACUTE_LUNG_INJURY_UP	43	-0.286999	-0.9855	0.479199	0.82006	1	1734	tags=14%, list=8%, signal=15%
PEPPER_CHRONIC_LYMPHOCYTIC_LEUKEMIA_DN	16	-0.368385	-0.985238	0.479542	0.820222	1	1518	tags=25%, list=7%, signal=27%
BIDUS_METASTASIS_DN	113	-0.248047	-0.984229	0.495035	0.822594	1	6703	tags=41%, list=31%, signal=58%
DUTERTRE_ESTRADIOL_RESPONSE_6HR_DN	71	-0.265876	-0.984157	0.491551	0.822137	1	6215	tags=37%, list=28%, signal=51%
KIM_TIAL1_TARGETS	27	-0.322633	-0.983183	0.474016	0.824486	1	2838	tags=19%, list=13%, signal=21%
TONKS_TARGETS_OF_RUNX1_RUNX1T1_FUSION_HSC_UP	148	-0.237817	-0.98313	0.499343	0.823997	1	6195	tags=34%, list=28%, signal=48%
BHATTACHARYA_EMBRYONIC_STEM_CELL	70	-0.264472	-0.983038	0.492604	0.823625	1	3055	tags=16%, list=14%, signal=18%
HERNANDEZ_ABERRANT_MITOSIS_BY_DOCETACEL_2NM_DN	20	-0.349449	-0.982818	0.47549	0.82361	1	7620	tags=65%, list=35%, signal=100%
WU_CELL_MIGRATION	149	-0.238713	-0.982656	0.506794	0.823434	1	3530	tags=19%, list=16%, signal=23%
STEARMAN_LUNG_CANCER_EARLY_VS_LATE_DN	51	-0.280425	-0.981385	0.492063	0.826528	1	3751	tags=24%, list=17%, signal=28%
RIGGINS_TAMOXIFEN_RESISTANCE_UP	59	-0.273296	-0.981206	0.489264	0.826427	1	3017	tags=20%, list=14%, signal=24%
KYNG_DNA_DAMAGE_BY_GAMMA_AND_UV_RADIATION	78	-0.265115	-0.980924	0.493488	0.826618	1	5242	tags=26%, list=24%, signal=34%
NAKAJIMA_MAST_CELL	42	-0.299659	-0.980903	0.501534	0.826022	1	1522	tags=17%, list=7%, signal=18%
WILLIAMS_ESR1_TARGETS_UP	21	-0.344054	-0.980711	0.484553	0.825963	1	681	tags=10%, list=3%, signal=10%
MCMURRAY_TP53_HRAS_COOPERATION_RESPONSE_DN	63	-0.270812	-0.980295	0.47205	0.826552	1	3339	tags=17%, list=15%, signal=21%
YAO_TEMPORAL_RESPONSE_TO_PROGESTERONE_CLUSTER_4	15	-0.371831	-0.979999	0.473776	0.826797	1	5521	tags=47%, list=25%, signal=62%
GRADE_COLON_VS_RECTAL_CANCER_UP	27	-0.324758	-0.979758	0.492386	0.826891	1	1247	tags=15%, list=6%, signal=16%
SCHAEFFER_PROSTATE_DEVELOPMENT_AND_CANCER_BOX4_UP	6	-0.483318	-0.979363	0.514981	0.827435	1	2335	tags=33%, list=11%, signal=37%
FERRANDO_T_ALL_WITH_MLL_ENL_FUSION_DN	73	-0.265926	-0.979355	0.497724	0.826801	1	4339	tags=23%, list=20%, signal=29%
GRAESSMANN_RESPONSE_TO_MC_AND_DOXORUBICIN_UP	492	-0.211699	-0.979337	0.523429	0.826201	1	5104	tags=23%, list=23%, signal=30%
NAKAMURA_ADIPOGENESIS_LATE_UP	88	-0.256897	-0.978861	0.492754	0.827003	1	2412	tags=14%, list=11%, signal=15%
WENDT_COHESIN_TARGETS_UP	25	-0.328595	-0.978505	0.497553	0.827449	1	7089	tags=40%, list=32%, signal=59%
TESAR_ALK_TARGETS_HUMAN_ES_4D_DN	6	-0.480518	-0.978344	0.521024	0.827314	1	5441	tags=50%, list=25%, signal=67%
MYLLYKANGAS_AMPLIFICATION_HOT_SPOT_21	5	-0.502407	-0.976949	0.525	0.830892	1	274	tags=20%, list=1%, signal=20%
FRASOR_RESPONSE_TO_ESTRADIOL_DN	72	-0.26542	-0.975774	0.491124	0.833811	1	3589	tags=19%, list=16%, signal=23%
DOUGLAS_BMI1_TARGETS_UP	441	-0.213613	-0.975683	0.521338	0.833426	1	5303	tags=24%, list=24%, signal=31%
ZHOU_PANCREATIC_ENDOCRINE_PROGENITOR	13	-0.385372	-0.97546	0.495682	0.833418	1	5655	tags=38%, list=26%, signal=52%
CHEBOTAEV_GR_TARGETS_DN	94	-0.251981	-0.974983	0.496372	0.83423	1	4239	tags=28%, list=19%, signal=34%
LA_MEN1_TARGETS	22	-0.338895	-0.974827	0.485484	0.834052	1	4769	tags=36%, list=22%, signal=46%
MITSIADES_RESPONSE_TO_APLIDIN_UP	326	-0.215534	-0.974418	0.536855	0.834638	1	6504	tags=29%, list=30%, signal=41%
ODONNELL_TARGETS_OF_MYC_AND_TFRC_UP	56	-0.273505	-0.973286	0.494135	0.837373	1	6637	tags=38%, list=30%, signal=54%
NUYTTEN_EZH2_TARGETS_UP	801	-0.203236	-0.972512	0.580194	0.839034	1	5449	tags=24%, list=25%, signal=31%
ZHOU_INFLAMMATORY_RESPONSE_FIMA_DN	184	-0.230326	-0.972351	0.529639	0.838828	1	5464	tags=25%, list=25%, signal=33%
HAEGERSTRAND_RESPONSE_TO_IMATINIB	9	-0.427515	-0.97204	0.512545	0.839107	1	3524	tags=44%, list=16%, signal=53%
MIKHAYLOVA_OXIDATIVE_STRESS_RESPONSE_VIA_VHL_UP	6	-0.475207	-0.971759	0.515789	0.839283	1	746	tags=17%, list=3%, signal=17%
ABBUD_LIF_SIGNALING_2_UP	12	-0.389634	-0.97175	0.496795	0.838655	1	526	tags=17%, list=2%, signal=17%
RAMPON_ENRICHED_LEARNING_ENVIRONMENT_EARLY_UP	14	-0.377521	-0.97153	0.486395	0.838613	1	6230	tags=43%, list=28%, signal=60%
KIM_ALL_DISORDERS_DURATION_CORR_UP	5	-0.510814	-0.970072	0.543561	0.842328	1	4205	tags=60%, list=19%, signal=74%
MATZUK_SPERMATOZOA	100	-0.251233	-0.969817	0.48784	0.842439	1	4886	tags=27%, list=22%, signal=35%
MISHRA_CARCINOMA_ASSOCIATED_FIBROBLAST_UP	18	-0.34727	-0.969684	0.508361	0.84218	1	4397	tags=44%, list=20%, signal=56%
SCHAEFFER_PROSTATE_DEVELOPMENT_AND_CANCER_BOX4_DN	27	-0.322039	-0.969378	0.526829	0.842438	1	9564	tags=59%, list=44%, signal=105%
BILANGES_SERUM_AND_RAPAMYCIN_SENSITIVE_GENES	55	-0.2707	-0.969377	0.51682	0.841788	1	15981	tags=100%, list=73%, signal=369%
KRIGE_RESPONSE_TO_TOSEDOSTAT_24HR_UP	515	-0.209041	-0.969119	0.568102	0.841932	1	5147	tags=25%, list=24%, signal=31%
IKEDA_MIR30_TARGETS_DN	25	-0.320227	-0.968549	0.506601	0.842938	1	4075	tags=28%, list=19%, signal=34%
WATANABE_RECTAL_CANCER_RADIOTHERAPY_RESPONSIVE_DN	78	-0.258495	-0.968025	0.525714	0.843805	1	3167	tags=18%, list=14%, signal=21%
YOSHIMURA_MAPK8_TARGETS_DN	315	-0.215515	-0.967753	0.541162	0.843955	1	4817	tags=21%, list=22%, signal=26%
HOEGERKORP_CD44_TARGETS_DIRECT_UP	22	-0.330773	-0.967489	0.506601	0.844111	1	4197	tags=32%, list=19%, signal=39%
NAKAMURA_TUMOR_ZONE_PERIPHERAL_VS_CENTRAL_DN	434	-0.211689	-0.966818	0.572954	0.845471	1	6861	tags=32%, list=31%, signal=46%
YAO_TEMPORAL_RESPONSE_TO_PROGESTERONE_CLUSTER_2	74	-0.258949	-0.966591	0.519174	0.845506	1	5338	tags=27%, list=24%, signal=36%
CHARAFE_BREAST_CANCER_LUMINAL_VS_BASAL_UP	259	-0.221111	-0.965974	0.54064	0.846699	1	7198	tags=39%, list=33%, signal=57%
NEBEN_AML_WITH_FLT3_OR_NRAS_UP	5	-0.499203	-0.965647	0.52349	0.847047	1	1627	tags=40%, list=7%, signal=43%
MORI_PRE_BI_LYMPHOCYTE_UP	67	-0.264354	-0.965387	0.522988	0.847221	1	6708	tags=33%, list=31%, signal=47%
LAIHO_COLORECTAL_CANCER_SERRATED_UP	94	-0.246418	-0.964626	0.515363	0.848812	1	8670	tags=39%, list=40%, signal=65%
RUTELLA_RESPONSE_TO_HGF_VS_CSF2RB_AND_IL4_DN	194	-0.226245	-0.96325	0.55305	0.852368	1	5413	tags=25%, list=25%, signal=33%
BHAT_ESR1_TARGETS_NOT_VIA_AKT1_DN	75	-0.257875	-0.962866	0.521341	0.852827	1	5533	tags=33%, list=25%, signal=44%
RIZ_ERYTHROID_DIFFERENTIATION_12HR	42	-0.28459	-0.962557	0.513761	0.853047	1	7820	tags=40%, list=36%, signal=63%
BROWNE_HCMV_INFECTION_6HR_UP	54	-0.27213	-0.962344	0.534073	0.853033	1	5398	tags=26%, list=25%, signal=34%
TIAN_TNF_SIGNALING_VIA_NFKB	26	-0.317925	-0.96231	0.487097	0.852475	1	2522	tags=23%, list=12%, signal=26%
BASAKI_YBX1_TARGETS_DN	271	-0.219685	-0.962271	0.564576	0.851948	1	6898	tags=34%, list=32%, signal=48%
GAL_LEUKEMIC_STEM_CELL_UP	92	-0.249914	-0.961943	0.552857	0.852323	1	3603	tags=17%, list=16%, signal=21%
SCHRAMM_INHBA_TARGETS_UP	7	-0.450685	-0.961527	0.529837	0.852914	1	5104	tags=43%, list=23%, signal=56%
KAAB_FAILED_HEART_ATRIUM_DN	120	-0.238912	-0.959477	0.558824	0.858381	1	4415	tags=18%, list=20%, signal=22%
MOOTHA_GLYCOLYSIS	19	-0.339725	-0.958752	0.508417	0.859908	1	1478	tags=16%, list=7%, signal=17%
RUTELLA_RESPONSE_TO_HGF_DN	183	-0.226948	-0.958716	0.554107	0.859354	1	7230	tags=38%, list=33%, signal=56%
NOUSHMEHR_GBM_GERMLINE_MUTATED	5	-0.505537	-0.958423	0.53211	0.859552	1	569	tags=20%, list=3%, signal=21%
LABBE_TARGETS_OF_TGFB1_AND_WNT3A_UP	99	-0.247397	-0.95815	0.550704	0.859707	1	6520	tags=38%, list=30%, signal=54%
WANG_CISPLATIN_RESPONSE_AND_XPC_DN	183	-0.225062	-0.957435	0.566443	0.861241	1	3356	tags=14%, list=15%, signal=16%
BROWN_MYELOID_CELL_DEVELOPMENT_UP	133	-0.23485	-0.957071	0.528378	0.861652	1	4223	tags=25%, list=19%, signal=31%
LI_WILMS_TUMOR_ANAPLASTIC_UP	14	-0.378172	-0.956749	0.510309	0.86199	1	5313	tags=29%, list=24%, signal=38%
ALONSO_METASTASIS_UP	153	-0.232477	-0.956377	0.561905	0.862392	1	6605	tags=27%, list=30%, signal=39%
MANTOVANI_VIRAL_GPCR_SIGNALING_DN	37	-0.291919	-0.955546	0.526917	0.864181	1	5582	tags=32%, list=25%, signal=43%
BROWNE_HCMV_INFECTION_48HR_UP	153	-0.231186	-0.954694	0.561475	0.866106	1	4929	tags=25%, list=23%, signal=32%
MARTINEZ_TP53_TARGETS_UP	500	-0.204716	-0.953227	0.635429	0.869743	1	4895	tags=22%, list=22%, signal=28%
WELCSH_BRCA1_TARGETS_UP	170	-0.229204	-0.953161	0.568575	0.869271	1	8020	tags=34%, list=37%, signal=53%
DORSAM_HOXA9_TARGETS_UP	32	-0.299362	-0.952787	0.533439	0.869747	1	4813	tags=25%, list=22%, signal=32%
LANG_MYB_FAMILY_TARGETS	26	-0.316016	-0.952626	0.528571	0.86955	1	3596	tags=23%, list=16%, signal=28%
KIM_WT1_TARGETS_8HR_DN	101	-0.243878	-0.952007	0.533528	0.870674	1	4946	tags=27%, list=23%, signal=34%
LI_PROSTATE_CANCER_EPIGENETIC	29	-0.303504	-0.951413	0.52381	0.87178	1	2663	tags=21%, list=12%, signal=24%
ZHOU_INFLAMMATORY_RESPONSE_LPS_UP	285	-0.216405	-0.951319	0.609964	0.871398	1	4956	tags=26%, list=23%, signal=33%
YAMANAKA_GLIOBLASTOMA_SURVIVAL_DN	6	-0.466437	-0.950479	0.537234	0.873228	1	8335	tags=50%, list=38%, signal=81%
SNIJDERS_AMPLIFIED_IN_HEAD_AND_NECK_TUMORS	34	-0.299657	-0.950374	0.545455	0.872865	1	2663	tags=18%, list=12%, signal=20%
SHETH_LIVER_CANCER_VS_TXNIP_LOSS_PAM2	129	-0.237403	-0.950124	0.558533	0.872957	1	1876	tags=12%, list=9%, signal=13%
GAUSSMANN_MLL_AF4_FUSION_TARGETS_C_UP	143	-0.228407	-0.949482	0.579376	0.874195	1	5672	tags=27%, list=26%, signal=36%
BRUINS_UVC_RESPONSE_VIA_TP53_GROUP_B	435	-0.206209	-0.949449	0.634548	0.873642	1	3830	tags=17%, list=17%, signal=20%
NIKOLSKY_BREAST_CANCER_21Q22_AMPLICON	12	-0.386165	-0.949425	0.530541	0.873054	1	3343	tags=33%, list=15%, signal=39%
MAHAJAN_RESPONSE_TO_IL1A_DN	62	-0.26534	-0.949342	0.542348	0.872626	1	7164	tags=39%, list=33%, signal=57%
DELACROIX_RAR_BOUND_ES	353	-0.209202	-0.949245	0.612469	0.872251	1	5864	tags=25%, list=27%, signal=34%
DAZARD_RESPONSE_TO_UV_SCC_UP	102	-0.241382	-0.949079	0.571831	0.872093	1	5894	tags=24%, list=27%, signal=32%
DARWICHE_PAPILLOMA_RISK_LOW_DN	114	-0.237338	-0.949054	0.556802	0.8715	1	3279	tags=18%, list=15%, signal=21%
MARSON_BOUND_BY_FOXP3_UNSTIMULATED	913	-0.197779	-0.948341	0.691239	0.872952	1	5501	tags=22%, list=25%, signal=28%
SMID_BREAST_CANCER_ERBB2_UP	105	-0.243261	-0.948044	0.580645	0.87317	1	3349	tags=19%, list=15%, signal=22%
PEDERSEN_METASTASIS_BY_ERBB2_ISOFORM_7	287	-0.214616	-0.947983	0.596977	0.872709	1	4529	tags=19%, list=21%, signal=24%
LEE_RECENT_THYMIC_EMIGRANT	156	-0.2292	-0.947557	0.586395	0.873316	1	6978	tags=32%, list=32%, signal=47%
FINETTI_BREAST_CANCERS_KINOME_GRAY	12	-0.374714	-0.947392	0.522337	0.873162	1	9564	tags=75%, list=44%, signal=133%
DEBOSSCHER_NFKB_TARGETS_REPRESSED_BY_GLUCOCORTICOIDS	20	-0.33476	-0.947327	0.532787	0.8727	1	6630	tags=55%, list=30%, signal=79%
HWANG_PROSTATE_CANCER_MARKERS	24	-0.320807	-0.947209	0.547739	0.872385	1	1409	tags=13%, list=6%, signal=13%
YAGI_AML_WITH_T_8_21_TRANSLOCATION	286	-0.213583	-0.947107	0.599232	0.872023	1	4713	tags=21%, list=22%, signal=27%
MATZUK_MALE_REPRODUCTION_SERTOLI	26	-0.316316	-0.946807	0.549206	0.872252	1	4141	tags=23%, list=19%, signal=28%
ZHAN_MULTIPLE_MYELOMA_SPIKED	20	-0.3316	-0.946296	0.53268	0.873058	1	4458	tags=40%, list=20%, signal=50%
FIRESTEIN_PROLIFERATION	148	-0.228497	-0.94628	0.590848	0.872456	1	6708	tags=34%, list=31%, signal=49%
GAUSSMANN_MLL_AF4_FUSION_TARGETS_G_DN	29	-0.304942	-0.946272	0.543189	0.871846	1	3138	tags=21%, list=14%, signal=24%
DAWSON_METHYLATED_IN_LYMPHOMA_TCL1	43	-0.279587	-0.945633	0.522436	0.873083	1	5281	tags=33%, list=24%, signal=43%
NIELSEN_LIPOSARCOMA_UP	16	-0.35387	-0.944912	0.533003	0.874563	1	3405	tags=44%, list=16%, signal=52%
KYNG_DNA_DAMAGE_BY_4NQO_OR_UV	54	-0.268956	-0.944151	0.556671	0.876106	1	2949	tags=17%, list=13%, signal=19%
LIN_NPAS4_TARGETS_UP	118	-0.239129	-0.943944	0.55571	0.876028	1	1131	tags=8%, list=5%, signal=9%
SHEDDEN_LUNG_CANCER_GOOD_SURVIVAL_A5	46	-0.280582	-0.943369	0.567233	0.877026	1	1543	tags=13%, list=7%, signal=14%
TURASHVILI_BREAST_DUCTAL_CARCINOMA_VS_LOBULAR_NORMAL_DN	48	-0.277931	-0.94334	0.555387	0.876458	1	2303	tags=15%, list=11%, signal=16%
SASSON_RESPONSE_TO_GONADOTROPHINS_DN	77	-0.25151	-0.943141	0.581818	0.876383	1	7082	tags=35%, list=32%, signal=52%
BARRIER_CANCER_RELAPSE_TUMOR_SAMPLE_UP	11	-0.384636	-0.943096	0.536627	0.875858	1	7823	tags=55%, list=36%, signal=85%
MATZUK_STEROIDOGENESIS	7	-0.444308	-0.942677	0.569149	0.876452	1	781	tags=14%, list=4%, signal=15%
BREDEMEYER_RAG_SIGNALING_NOT_VIA_ATM_UP	39	-0.286318	-0.942571	0.569182	0.8761	1	4018	tags=23%, list=18%, signal=28%
ELVIDGE_HIF1A_TARGETS_DN	71	-0.254054	-0.942511	0.551672	0.87563	1	3038	tags=20%, list=14%, signal=23%
CREIGHTON_ENDOCRINE_THERAPY_RESISTANCE_3	510	-0.202947	-0.942088	0.655443	0.876183	1	6981	tags=34%, list=32%, signal=48%
LEE_LIVER_CANCER_DENA_UP	54	-0.268937	-0.941816	0.561644	0.876286	1	5936	tags=37%, list=27%, signal=51%
MCBRYAN_PUBERTAL_BREAST_3_4WK_DN	31	-0.302373	-0.941519	0.552	0.876512	1	3649	tags=19%, list=17%, signal=23%
ACEVEDO_LIVER_CANCER_UP	710	-0.199405	-0.941466	0.685125	0.876033	1	5996	tags=24%, list=27%, signal=31%
AFFAR_YY1_TARGETS_UP	194	-0.220487	-0.940919	0.596053	0.876952	1	3260	tags=19%, list=15%, signal=22%
RADMACHER_AML_PROGNOSIS	65	-0.260211	-0.940486	0.580981	0.877526	1	3883	tags=22%, list=18%, signal=26%
ALONSO_METASTASIS_NEURAL_UP	16	-0.350312	-0.939684	0.539735	0.879185	1	3141	tags=25%, list=14%, signal=29%
BREDEMEYER_RAG_SIGNALING_VIA_ATM_NOT_VIA_NFKB_UP	35	-0.293398	-0.93914	0.563579	0.880094	1	6781	tags=43%, list=31%, signal=62%
MATTIOLI_MULTIPLE_MYELOMA_SUBGROUPS	11	-0.392819	-0.938926	0.559792	0.880064	1	3635	tags=27%, list=17%, signal=33%
DAZARD_RESPONSE_TO_UV_NHEK_DN	245	-0.215779	-0.938696	0.641414	0.880079	1	6422	tags=29%, list=29%, signal=40%
REN_ALVEOLAR_RHABDOMYOSARCOMA_DN	379	-0.206377	-0.938555	0.652226	0.879855	1	4045	tags=18%, list=18%, signal=22%
BROWNE_HCMV_INFECTION_18HR_UP	151	-0.22696	-0.937425	0.596206	0.882371	1	4710	tags=22%, list=22%, signal=28%
TSAI_DNAJB4_TARGETS_UP	10	-0.395776	-0.937167	0.544369	0.882468	1	1775	tags=30%, list=8%, signal=33%
CAIRO_PML_TARGETS_BOUND_BY_MYC_DN	13	-0.362014	-0.936918	0.536256	0.882557	1	1009	tags=15%, list=5%, signal=16%
WILENSKY_RESPONSE_TO_DARAPLADIB	27	-0.306796	-0.936159	0.542536	0.884038	1	4558	tags=33%, list=21%, signal=42%
JOHANSSON_BRAIN_CANCER_EARLY_VS_LATE_UP	7	-0.450498	-0.936127	0.570128	0.883502	1	4953	tags=29%, list=23%, signal=37%
YAMASHITA_METHYLATED_IN_PROSTATE_CANCER	48	-0.270459	-0.935623	0.549763	0.88427	1	4595	tags=31%, list=21%, signal=39%
GROSS_HYPOXIA_VIA_ELK3_AND_HIF1A_DN	84	-0.243786	-0.934527	0.58908	0.886747	1	6803	tags=37%, list=31%, signal=53%
GEISS_RESPONSE_TO_DSRNA_DN	14	-0.356757	-0.934263	0.566722	0.886874	1	6879	tags=50%, list=31%, signal=73%
BILD_E2F3_ONCOGENIC_SIGNATURE	172	-0.22175	-0.93398	0.629333	0.887041	1	5971	tags=28%, list=27%, signal=38%
KANG_CISPLATIN_RESISTANCE_UP	15	-0.359005	-0.933868	0.554031	0.886728	1	4661	tags=33%, list=21%, signal=42%
HASLINGER_B_CLL_WITH_MUTATED_VH_GENES	16	-0.349894	-0.93287	0.558484	0.888904	1	634	tags=13%, list=3%, signal=13%
IKEDA_MIR30_TARGETS_UP	107	-0.239349	-0.932165	0.598228	0.890212	1	3681	tags=14%, list=17%, signal=17%
NIKOLSKY_BREAST_CANCER_15Q26_AMPLICON	14	-0.358367	-0.931466	0.544521	0.891531	1	550	tags=14%, list=3%, signal=15%
LEE_SP4_THYMOCYTE	11	-0.380498	-0.931371	0.564784	0.891149	1	3183	tags=27%, list=15%, signal=32%
HASLINGER_B_CLL_WITH_11Q23_DELETION	19	-0.331355	-0.930306	0.55184	0.893462	1	252	tags=11%, list=1%, signal=11%
GARGALOVIC_RESPONSE_TO_OXIDIZED_PHOSPHOLIPIDS_BLACK_DN	7	-0.440773	-0.930085	0.555755	0.893424	1	4464	tags=29%, list=20%, signal=36%
CERVERA_SDHB_TARGETS_2	90	-0.24105	-0.929989	0.597421	0.893049	1	5157	tags=32%, list=24%, signal=42%
WANG_ESOPHAGUS_CANCER_PROGRESSION_UP	7	-0.444773	-0.929909	0.579861	0.892645	1	2961	tags=29%, list=14%, signal=33%
NAKAYAMA_SOFT_TISSUE_TUMORS_PCA2_UP	75	-0.250827	-0.929406	0.575144	0.893424	1	6414	tags=28%, list=29%, signal=39%
HUTTMANN_B_CLL_POOR_SURVIVAL_DN	48	-0.268586	-0.928205	0.581288	0.896158	1	273	tags=6%, list=1%, signal=6%
GALIE_TUMOR_STEMNESS_GENES	5	-0.48743	-0.927925	0.563506	0.896288	1	5855	tags=60%, list=27%, signal=82%
DORSAM_HOXA9_TARGETS_DN	26	-0.304854	-0.927777	0.545752	0.896078	1	5485	tags=31%, list=25%, signal=41%
VANASSE_BCL2_TARGETS_DN	61	-0.257079	-0.927222	0.61562	0.896989	1	2259	tags=16%, list=10%, signal=18%
LIAN_LIPA_TARGETS_3M	52	-0.265283	-0.926871	0.562315	0.897298	1	5513	tags=33%, list=25%, signal=44%
BOYAULT_LIVER_CANCER_SUBCLASS_G123_DN	44	-0.273354	-0.926845	0.590267	0.896731	1	3620	tags=20%, list=17%, signal=24%
ROSS_AML_WITH_PML_RARA_FUSION	62	-0.258376	-0.926076	0.579268	0.89824	1	2022	tags=15%, list=9%, signal=16%
DAVICIONI_TARGETS_OF_PAX_FOXO1_FUSIONS_UP	216	-0.21436	-0.925573	0.641849	0.899019	1	5855	tags=27%, list=27%, signal=37%
MCCABE_HOXC6_TARGETS_CANCER_DN	17	-0.339141	-0.925288	0.556303	0.8992	1	6503	tags=35%, list=30%, signal=50%
GRAHAM_CML_QUIESCENT_VS_CML_DIVIDING_DN	6	-0.462087	-0.924488	0.556537	0.90078	1	1522	tags=33%, list=7%, signal=36%
ELVIDGE_HIF1A_AND_HIF2A_TARGETS_DN	79	-0.248888	-0.923997	0.629573	0.901537	1	3955	tags=24%, list=18%, signal=29%
CHICAS_RB1_TARGETS_SENESCENT	430	-0.203376	-0.923918	0.702641	0.90111	1	6203	tags=29%, list=28%, signal=39%
ACOSTA_PROLIFERATION_INDEPENDENT_MYC_TARGETS_UP	66	-0.25453	-0.923581	0.600587	0.90143	1	4499	tags=26%, list=21%, signal=32%
STAMBOLSKY_RESPONSE_TO_VITAMIN_D3_UP	60	-0.257696	-0.92301	0.603448	0.9024	1	455	tags=7%, list=2%, signal=7%
MARSHALL_VIRAL_INFECTION_RESPONSE_UP	6	-0.453145	-0.921849	0.57672	0.90503	1	5725	tags=50%, list=26%, signal=68%
HAMAI_APOPTOSIS_VIA_TRAIL_DN	146	-0.225186	-0.921616	0.639893	0.905052	1	2287	tags=13%, list=10%, signal=14%
LOPEZ_MESOTHELIOMA_SURVIVAL_UP	5	-0.482004	-0.920045	0.608365	0.908811	1	1607	tags=20%, list=7%, signal=22%
CONCANNON_APOPTOSIS_BY_EPOXOMICIN_DN	132	-0.225142	-0.91999	0.653203	0.908319	1	3713	tags=17%, list=17%, signal=21%
LI_CISPLATIN_RESISTANCE_UP	22	-0.314635	-0.919716	0.590909	0.908481	1	4970	tags=41%, list=23%, signal=53%
LENAOUR_DENDRITIC_CELL_MATURATION_DN	104	-0.234363	-0.919687	0.632948	0.90792	1	4946	tags=27%, list=23%, signal=35%
VERHAAK_GLIOBLASTOMA_CLASSICAL	167	-0.218857	-0.91838	0.646586	0.910953	1	3993	tags=20%, list=18%, signal=25%
ACEVEDO_FGFR1_TARGETS_IN_PROSTATE_CANCER_MODEL_UP	233	-0.211009	-0.917748	0.675711	0.91199	1	2224	tags=12%, list=10%, signal=14%
KOKKINAKIS_METHIONINE_DEPRIVATION_96HR_UP	111	-0.22926	-0.916441	0.631724	0.914934	1	4648	tags=24%, list=21%, signal=31%
GOUYER_TATI_TARGETS_UP	9	-0.394637	-0.916177	0.573503	0.914963	1	415	tags=11%, list=2%, signal=11%
DAIRKEE_CANCER_PRONE_RESPONSE_E2	26	-0.311784	-0.915889	0.566722	0.915096	1	3596	tags=23%, list=16%, signal=28%
ABDULRAHMAN_KIDNEY_CANCER_VHL_DN	13	-0.361957	-0.915358	0.58557	0.915854	1	6144	tags=46%, list=28%, signal=64%
IVANOVA_HEMATOPOIESIS_STEM_CELL_SHORT_TERM	25	-0.310387	-0.915218	0.566667	0.915596	1	4406	tags=28%, list=20%, signal=35%
MCBRYAN_PUBERTAL_TGFB1_TARGETS_UP	156	-0.222719	-0.914973	0.648964	0.915634	1	4960	tags=24%, list=23%, signal=31%
DARWICHE_PAPILLOMA_RISK_HIGH_VS_LOW_DN	27	-0.304149	-0.91452	0.602826	0.916274	1	6147	tags=37%, list=28%, signal=51%
ZHU_CMV_ALL_UP	101	-0.235207	-0.914439	0.63925	0.915823	1	3107	tags=15%, list=14%, signal=17%
ZEMBUTSU_SENSITIVITY_TO_FLUOROURACIL	14	-0.346141	-0.914299	0.586667	0.915573	1	2239	tags=21%, list=10%, signal=24%
BAKER_HEMATOPOIESIS_STAT3_TARGETS	15	-0.345145	-0.913767	0.553292	0.916423	1	6083	tags=33%, list=28%, signal=46%
LEE_AGING_MUSCLE_UP	40	-0.277472	-0.913566	0.591049	0.916319	1	6115	tags=38%, list=28%, signal=52%
HEDENFALK_BREAST_CANCER_BRACX_DN	18	-0.335566	-0.913359	0.579392	0.916241	1	1914	tags=17%, list=9%, signal=18%
HOLLMANN_APOPTOSIS_VIA_CD40_UP	162	-0.220136	-0.913075	0.665765	0.916428	1	3564	tags=17%, list=16%, signal=20%
CHESLER_BRAIN_D6MIT150_QTL_CIS	6	-0.46035	-0.912664	0.58348	0.916871	1	3176	tags=33%, list=15%, signal=39%
SAKAI_TUMOR_INFILTRATING_MONOCYTES_UP	25	-0.306108	-0.912067	0.604538	0.917848	1	4470	tags=36%, list=20%, signal=45%
BLALOCK_ALZHEIMERS_DISEASE_UP	1366	-0.187872	-0.911917	0.853734	0.9176	1	4940	tags=21%, list=23%, signal=25%
NIELSEN_SCHWANNOMA_DN	15	-0.34561	-0.911684	0.586667	0.917597	1	3863	tags=27%, list=18%, signal=32%
DASU_IL6_SIGNALING_UP	48	-0.267013	-0.911202	0.626506	0.918293	1	3832	tags=23%, list=18%, signal=28%
ZHONG_SECRETOME_OF_LUNG_CANCER_AND_MACROPHAGE	68	-0.252171	-0.910836	0.631501	0.918647	1	4990	tags=18%, list=23%, signal=23%
KAYO_AGING_MUSCLE_UP	195	-0.215355	-0.910688	0.688591	0.918418	1	3605	tags=19%, list=16%, signal=23%
KOYAMA_SEMA3B_TARGETS_DN	287	-0.203829	-0.910441	0.718072	0.918434	1	5549	tags=26%, list=25%, signal=34%
NUTT_GBM_VS_AO_GLIOMA_DN	35	-0.278967	-0.909702	0.603125	0.919816	1	4713	tags=26%, list=22%, signal=33%
WANG_RESPONSE_TO_BEXAROTENE_UP	27	-0.294861	-0.909681	0.612903	0.919233	1	3030	tags=19%, list=14%, signal=21%
MCBRYAN_PUBERTAL_BREAST_4_5WK_UP	227	-0.212323	-0.909453	0.710013	0.919238	1	4862	tags=20%, list=22%, signal=26%
WEI_MIR34A_TARGETS	112	-0.226774	-0.90941	0.638968	0.918725	1	5083	tags=24%, list=23%, signal=31%
IIZUKA_LIVER_CANCER_PROGRESSION_L0_L1_UP	12	-0.365252	-0.909269	0.573684	0.918491	1	3212	tags=25%, list=15%, signal=29%
FLOTHO_PEDIATRIC_ALL_THERAPY_RESPONSE_DN	20	-0.327134	-0.909071	0.589786	0.918352	1	1145	tags=10%, list=5%, signal=11%
MORI_SMALL_PRE_BII_LYMPHOCYTE_UP	75	-0.242346	-0.908093	0.640351	0.920352	1	6703	tags=39%, list=31%, signal=56%
BERENJENO_TRANSFORMED_BY_RHOA_REVERSIBLY_DN	27	-0.304841	-0.906878	0.592949	0.922974	1	6173	tags=33%, list=28%, signal=46%
JOHNSTONE_PARVB_TARGETS_2_UP	112	-0.23212	-0.906512	0.635211	0.923355	1	6246	tags=34%, list=29%, signal=47%
VANDESLUIS_COMMD1_TARGETS_GROUP_3_DN	36	-0.284166	-0.905695	0.645412	0.924936	1	4482	tags=36%, list=20%, signal=45%
SCHAEFFER_PROSTATE_DEVELOPMENT_AND_CANCER_BOX1_UP	11	-0.376715	-0.905298	0.58938	0.925351	1	7903	tags=55%, list=36%, signal=85%
GRAHAM_CML_DIVIDING_VS_NORMAL_QUIESCENT_UP	151	-0.218074	-0.903896	0.677249	0.928429	1	1544	tags=8%, list=7%, signal=8%
MIKI_COEXPRESSED_WITH_CYP19A1	7	-0.422225	-0.903568	0.588022	0.928658	1	4632	tags=29%, list=21%, signal=36%
KAUFFMANN_MELANOMA_RELAPSE_DN	5	-0.476565	-0.902637	0.624772	0.930459	1	4245	tags=40%, list=19%, signal=50%
RAO_BOUND_BY_SALL4_ISOFORM_B	384	-0.197686	-0.902089	0.75939	0.931283	1	5181	tags=22%, list=24%, signal=29%
HOLLEMAN_DAUNORUBICIN_ALL_UP	7	-0.426312	-0.90205	0.60354	0.930737	1	2961	tags=29%, list=14%, signal=33%
ONDER_CDH1_TARGETS_1_UP	98	-0.228003	-0.901219	0.671988	0.932358	1	4575	tags=24%, list=21%, signal=31%
ITO_PTTG1_TARGETS_UP	9	-0.394729	-0.901036	0.591065	0.932217	1	303	tags=11%, list=1%, signal=11%
LANDIS_ERBB2_BREAST_TUMORS_65_DN	33	-0.283743	-0.900194	0.620915	0.933782	1	5440	tags=36%, list=25%, signal=48%
DACOSTA_UV_RESPONSE_VIA_ERCC3_XPCS_DN	69	-0.244462	-0.899788	0.637956	0.934201	1	3362	tags=19%, list=15%, signal=22%
KIM_MYCL1_AMPLIFICATION_TARGETS_DN	17	-0.330626	-0.899766	0.612903	0.933612	1	1978	tags=18%, list=9%, signal=19%
VALK_AML_CLUSTER_7	22	-0.315699	-0.899618	0.613893	0.933334	1	3243	tags=23%, list=15%, signal=27%
RIZ_ERYTHROID_DIFFERENTIATION_CCNE1	33	-0.283993	-0.899454	0.625608	0.933125	1	7685	tags=39%, list=35%, signal=61%
ELVIDGE_HYPOXIA_UP	131	-0.221591	-0.898632	0.684507	0.934754	1	3471	tags=18%, list=16%, signal=22%
KUROKAWA_LIVER_CANCER_CHEMOTHERAPY_DN	38	-0.277833	-0.898183	0.634375	0.935331	1	1567	tags=11%, list=7%, signal=11%
LABBE_WNT3A_TARGETS_DN	85	-0.237765	-0.898171	0.637931	0.934733	1	5890	tags=33%, list=27%, signal=45%
ENK_UV_RESPONSE_EPIDERMIS_DN	435	-0.196163	-0.897376	0.758539	0.936235	1	6317	tags=26%, list=29%, signal=36%
DORMOY_ELAVL1_TARGETS	16	-0.333328	-0.897098	0.602131	0.936352	1	7922	tags=38%, list=36%, signal=59%
TIEN_INTESTINE_PROBIOTICS_6HR_UP	42	-0.267712	-0.896948	0.610592	0.93612	1	3051	tags=10%, list=14%, signal=11%
FERRANDO_T_ALL_WITH_MLL_ENL_FUSION_UP	72	-0.245333	-0.895947	0.649017	0.938162	1	1579	tags=11%, list=7%, signal=12%
OSMAN_BLADDER_CANCER_UP	313	-0.201248	-0.895556	0.760098	0.938488	1	7304	tags=32%, list=33%, signal=47%
HOFFMANN_IMMATURE_TO_MATURE_B_LYMPHOCYTE_UP	34	-0.280829	-0.895529	0.632399	0.937919	1	1862	tags=15%, list=9%, signal=16%
MUELLER_COMMON_TARGETS_OF_AML_FUSIONS_UP	14	-0.348425	-0.895474	0.615385	0.93742	1	7665	tags=43%, list=35%, signal=66%
KONDO_PROSTATE_CANCER_HCP_WITH_H3K27ME3	66	-0.244986	-0.894441	0.65593	0.939515	1	3809	tags=23%, list=17%, signal=27%
ABRAHAM_ALPC_VS_MULTIPLE_MYELOMA_UP	24	-0.29868	-0.894294	0.606299	0.93928	1	2941	tags=17%, list=13%, signal=19%
LIAN_LIPA_TARGETS_6M	66	-0.243717	-0.893681	0.670181	0.940178	1	5513	tags=30%, list=25%, signal=40%
PURBEY_TARGETS_OF_CTBP1_NOT_SATB1_DN	341	-0.199144	-0.893191	0.782249	0.940852	1	5524	tags=25%, list=25%, signal=33%
HUANG_FOXA2_TARGETS_DN	34	-0.280553	-0.89317	0.628615	0.940269	1	3900	tags=29%, list=18%, signal=36%
BRUINS_UVC_RESPONSE_LATE	874	-0.186813	-0.893105	0.869612	0.939787	1	4656	tags=19%, list=21%, signal=23%
GREGORY_SYNTHETIC_LETHAL_WITH_IMATINIB	101	-0.228431	-0.89301	0.677778	0.939402	1	3954	tags=17%, list=18%, signal=20%
SABATES_COLORECTAL_ADENOMA_SIZE_DN	8	-0.406795	-0.892945	0.606762	0.938935	1	184	tags=13%, list=1%, signal=13%
NIKOLSKY_BREAST_CANCER_20Q11_AMPLICON	20	-0.310189	-0.892771	0.602041	0.938749	1	9178	tags=60%, list=42%, signal=103%
GRABARCZYK_BCL11B_TARGETS_UP	55	-0.256221	-0.892529	0.66311	0.938722	1	1107	tags=7%, list=5%, signal=8%
ACEVEDO_NORMAL_TISSUE_ADJACENT_TO_LIVER_TUMOR_DN	274	-0.202031	-0.892305	0.768461	0.938637	1	7040	tags=30%, list=32%, signal=44%
MCBRYAN_PUBERTAL_BREAST_5_6WK_UP	96	-0.226383	-0.892137	0.684736	0.938442	1	4374	tags=19%, list=20%, signal=23%
HASEGAWA_TUMORIGENESIS_BY_RET_C634R	9	-0.395618	-0.891884	0.617216	0.938468	1	6865	tags=67%, list=31%, signal=97%
FIGUEROA_AML_METHYLATION_CLUSTER_3_UP	117	-0.222308	-0.891583	0.67842	0.938651	1	2380	tags=14%, list=11%, signal=15%
NIELSEN_LIPOSARCOMA_DN	19	-0.31337	-0.890685	0.628849	0.940376	1	4108	tags=32%, list=19%, signal=39%
KOINUMA_COLON_CANCER_MSI_DN	13	-0.356037	-0.890457	0.604651	0.940332	1	2765	tags=15%, list=13%, signal=18%
CLAUS_PGR_POSITIVE_MENINGIOMA_DN	11	-0.363189	-0.890118	0.59612	0.94056	1	1247	tags=18%, list=6%, signal=19%
COLIN_PILOCYTIC_ASTROCYTOMA_VS_GLIOBLASTOMA_UP	32	-0.281304	-0.889933	0.633385	0.940401	1	4618	tags=28%, list=21%, signal=36%
OUELLET_CULTURED_OVARIAN_CANCER_INVASIVE_VS_LMP_DN	24	-0.299188	-0.889723	0.611018	0.94029	1	2417	tags=21%, list=11%, signal=23%
OUILLETTE_CLL_13Q14_DELETION_UP	52	-0.257821	-0.889639	0.657097	0.939876	1	2825	tags=13%, list=13%, signal=15%
ASTON_MAJOR_DEPRESSIVE_DISORDER_UP	35	-0.277495	-0.889264	0.63837	0.94017	1	1038	tags=14%, list=5%, signal=15%
BURTON_ADIPOGENESIS_11	45	-0.259504	-0.888763	0.647235	0.940805	1	2215	tags=13%, list=10%, signal=15%
KYNG_DNA_DAMAGE_BY_UV	53	-0.258765	-0.888718	0.645161	0.940297	1	4094	tags=25%, list=19%, signal=30%
BANDRES_RESPONSE_TO_CARMUSTIN_WITHOUT_MGMT_48HR_UP	18	-0.318936	-0.88784	0.640068	0.941969	1	2815	tags=17%, list=13%, signal=19%
NIKOLSKY_BREAST_CANCER_16P13_AMPLICON	80	-0.240809	-0.887746	0.685106	0.941588	1	2460	tags=14%, list=11%, signal=15%
MASSARWEH_RESPONSE_TO_ESTRADIOL	49	-0.256222	-0.887626	0.67075	0.94127	1	7061	tags=37%, list=32%, signal=54%
PARK_TRETINOIN_RESPONSE_AND_PML_RARA_FUSION	28	-0.291122	-0.88747	0.65	0.941026	1	3099	tags=21%, list=14%, signal=25%
LEI_HOXC8_TARGETS_UP	12	-0.367652	-0.887092	0.630282	0.9414	1	8296	tags=75%, list=38%, signal=121%
BOYAULT_LIVER_CANCER_SUBCLASS_G5_DN	17	-0.325126	-0.886595	0.638191	0.942087	1	5452	tags=35%, list=25%, signal=47%
LOPEZ_MESOTELIOMA_SURVIVAL_TIME_UP	12	-0.353688	-0.886026	0.619217	0.942906	1	420	tags=8%, list=2%, signal=8%
LOPES_METHYLATED_IN_COLON_CANCER_DN	25	-0.291618	-0.88595	0.636667	0.942459	1	1579	tags=16%, list=7%, signal=17%
KUNINGER_IGF1_VS_PDGFB_TARGETS_DN	39	-0.266326	-0.88572	0.628617	0.942431	1	6440	tags=36%, list=29%, signal=51%
GEISS_RESPONSE_TO_DSRNA_UP	34	-0.27688	-0.885515	0.656012	0.942335	1	4817	tags=29%, list=22%, signal=38%
LEE_AGING_CEREBELLUM_UP	74	-0.240557	-0.885206	0.695652	0.942482	1	4827	tags=22%, list=22%, signal=28%
WAKABAYASHI_ADIPOGENESIS_PPARG_RXRA_BOUND_8D	665	-0.185608	-0.884973	0.854911	0.942442	1	6136	tags=26%, list=28%, signal=34%
GAVIN_IL2_RESPONSIVE_FOXP3_TARGETS_UP	15	-0.336845	-0.88456	0.623064	0.942855	1	2838	tags=27%, list=13%, signal=31%
FOSTER_KDM1A_TARGETS_DN	159	-0.21301	-0.884431	0.713521	0.94257	1	3785	tags=18%, list=17%, signal=22%
IYENGAR_RESPONSE_TO_ADIPOCYTE_FACTORS	9	-0.379594	-0.884391	0.606164	0.942039	1	2045	tags=22%, list=9%, signal=25%
CHOI_ATL_ACUTE_STAGE	5	-0.454191	-0.883951	0.629764	0.942591	1	387	tags=20%, list=2%, signal=20%
HOSHIDA_LIVER_CANCER_LATE_RECURRENCE_DN	62	-0.247994	-0.882741	0.691377	0.945074	1	3551	tags=23%, list=16%, signal=27%
DEBIASI_APOPTOSIS_BY_REOVIRUS_INFECTION_UP	238	-0.203639	-0.881509	0.74937	0.947564	1	5818	tags=24%, list=27%, signal=33%
GROSS_HIF1A_TARGETS_UP	7	-0.405289	-0.881312	0.603571	0.947429	1	2419	tags=29%, list=11%, signal=32%
LI_AMPLIFIED_IN_LUNG_CANCER	161	-0.211589	-0.88094	0.740053	0.947738	1	3164	tags=11%, list=14%, signal=13%
PELLICCIOTTA_HDAC_IN_ANTIGEN_PRESENTATION_DN	43	-0.259737	-0.880862	0.662651	0.947314	1	4526	tags=21%, list=21%, signal=26%
CHNG_MULTIPLE_MYELOMA_HYPERPLOID_DN	27	-0.291755	-0.880668	0.648208	0.947172	1	1589	tags=11%, list=7%, signal=12%
MEISSNER_NPC_ICP_WITH_H3K4ME3	13	-0.349982	-0.87991	0.635434	0.948404	1	1560	tags=15%, list=7%, signal=17%
RAGHAVACHARI_PLATELET_SPECIFIC_GENES	55	-0.249235	-0.878653	0.663664	0.950955	1	4162	tags=20%, list=19%, signal=25%
PETRETTO_LEFT_VENTRICLE_MASS_QTL_CIS_UP	5	-0.445628	-0.878513	0.626786	0.950666	1	1366	tags=20%, list=6%, signal=21%
ROME_INSULIN_TARGETS_IN_MUSCLE_DN	121	-0.219311	-0.878169	0.740947	0.9509	1	4817	tags=26%, list=22%, signal=34%
SENESE_HDAC2_TARGETS_UP	96	-0.228186	-0.87784	0.700709	0.95109	1	4216	tags=19%, list=19%, signal=23%
BOYLAN_MULTIPLE_MYELOMA_C_CLUSTER_DN	29	-0.284799	-0.876996	0.633224	0.952517	1	1061	tags=10%, list=5%, signal=11%
MYLLYKANGAS_AMPLIFICATION_HOT_SPOT_16	8	-0.401691	-0.876845	0.614565	0.952262	1	3700	tags=25%, list=17%, signal=30%
MUNSHI_MULTIPLE_MYELOMA_DN	7	-0.416724	-0.87681	0.645161	0.951731	1	200	tags=14%, list=1%, signal=14%
JISON_SICKLE_CELL_DISEASE_DN	131	-0.217235	-0.876548	0.733333	0.951716	1	6637	tags=24%, list=30%, signal=34%
MODY_HIPPOCAMPUS_PRENATAL	36	-0.268145	-0.876465	0.64366	0.951287	1	5732	tags=19%, list=26%, signal=26%
NOUSHMEHR_GBM_SILENCED_BY_METHYLATION	41	-0.262751	-0.876181	0.658385	0.951382	1	3773	tags=24%, list=17%, signal=29%
RAMASWAMY_METASTASIS_DN	47	-0.257677	-0.876053	0.663093	0.951053	1	6457	tags=38%, list=29%, signal=54%
VANTVEER_BREAST_CANCER_BRCA1_UP	26	-0.29139	-0.875602	0.676617	0.951541	1	5087	tags=31%, list=23%, signal=40%
BLALOCK_ALZHEIMERS_DISEASE_DN	1059	-0.181934	-0.875462	0.924868	0.951278	1	4991	tags=19%, list=23%, signal=23%
THUM_MIR21_TARGETS_HEART_DISEASE_DN	7	-0.41053	-0.87529	0.645614	0.951105	1	2179	tags=29%, list=10%, signal=32%
BROWNE_HCMV_INFECTION_4HR_UP	46	-0.259663	-0.875268	0.667185	0.950538	1	1968	tags=15%, list=9%, signal=17%
LINDSTEDT_DENDRITIC_CELL_MATURATION_A	61	-0.2465	-0.873771	0.681203	0.953514	1	3365	tags=23%, list=15%, signal=27%
IWANAGA_E2F1_TARGETS_NOT_INDUCED_BY_SERUM	5	-0.448093	-0.873723	0.601504	0.953023	1	1656	tags=20%, list=8%, signal=22%
FOSTER_TOLERANT_MACROPHAGE_UP	130	-0.212557	-0.873551	0.76	0.952831	1	6164	tags=35%, list=28%, signal=49%
CHARAFE_BREAST_CANCER_LUMINAL_VS_BASAL_DN	349	-0.192681	-0.873409	0.837037	0.952534	1	3766	tags=17%, list=17%, signal=20%
KASLER_HDAC7_TARGETS_1_DN	16	-0.329125	-0.873192	0.638261	0.952421	1	6637	tags=44%, list=30%, signal=63%
ZHANG_TLX_TARGETS_36HR_UP	187	-0.203965	-0.873032	0.757123	0.95217	1	4038	tags=18%, list=18%, signal=22%
CHANGOLKAR_H2AFY_TARGETS_UP	34	-0.271942	-0.872444	0.689602	0.952947	1	7383	tags=38%, list=34%, signal=58%
GENTILE_UV_RESPONSE_CLUSTER_D8	32	-0.275614	-0.872261	0.65154	0.952773	1	2099	tags=13%, list=10%, signal=14%
ROESSLER_LIVER_CANCER_METASTASIS_UP	93	-0.229085	-0.871023	0.720998	0.955174	1	4077	tags=22%, list=19%, signal=26%
TAKEDA_TARGETS_OF_NUP98_HOXA9_FUSION_6HR_DN	36	-0.271534	-0.869455	0.672956	0.958349	1	5633	tags=31%, list=26%, signal=41%
SENGUPTA_EBNA1_ANTICORRELATED	107	-0.222244	-0.868559	0.694051	0.95989	1	2774	tags=15%, list=13%, signal=17%
ROLEF_GLIS3_TARGETS	35	-0.27192	-0.867986	0.675806	0.960614	1	4151	tags=29%, list=19%, signal=35%
ZHU_CMV_8_HR_DN	45	-0.252342	-0.867842	0.676876	0.960308	1	2095	tags=13%, list=10%, signal=15%
LU_EZH2_TARGETS_UP	193	-0.206023	-0.867487	0.775457	0.960556	1	4006	tags=18%, list=18%, signal=22%
OXFORD_RALA_TARGETS_DN	8	-0.392958	-0.867237	0.635379	0.960498	1	2223	tags=25%, list=10%, signal=28%
STARK_HYPPOCAMPUS_22Q11_DELETION_UP	41	-0.260701	-0.866878	0.701754	0.960769	1	5532	tags=34%, list=25%, signal=46%
SHEPARD_CRUSH_AND_BURN_MUTANT_DN	151	-0.20993	-0.866857	0.748281	0.960195	1	6414	tags=32%, list=29%, signal=46%
LEI_MYB_TARGETS	264	-0.198867	-0.866756	0.805521	0.95981	1	3164	tags=15%, list=14%, signal=17%
ABBUD_LIF_SIGNALING_1_DN	22	-0.298907	-0.866542	0.667205	0.959711	1	4133	tags=18%, list=19%, signal=22%
MIKKELSEN_NPC_LCP_WITH_H3K4ME3	41	-0.25737	-0.866051	0.687011	0.960245	1	4742	tags=24%, list=22%, signal=31%
YOSHIOKA_LIVER_CANCER_EARLY_RECURRENCE_UP	26	-0.293723	-0.865616	0.687697	0.960682	1	3521	tags=23%, list=16%, signal=27%
KARLSSON_TGFB1_TARGETS_DN	174	-0.20727	-0.865517	0.760211	0.96027	1	8141	tags=41%, list=37%, signal=65%
NAKAMURA_LUNG_CANCER	7	-0.401698	-0.865363	0.645221	0.960027	1	2679	tags=29%, list=12%, signal=33%
BOYLAN_MULTIPLE_MYELOMA_PCA1_UP	86	-0.225742	-0.865151	0.738506	0.959899	1	4343	tags=28%, list=20%, signal=35%
GOERING_BLOOD_HDL_CHOLESTEROL_QTL_TRANS	9	-0.382837	-0.86513	0.652878	0.959327	1	1098	tags=22%, list=5%, signal=23%
ZHENG_RESPONSE_TO_ARSENITE_DN	16	-0.328254	-0.865103	0.651877	0.95877	1	5108	tags=38%, list=23%, signal=49%
DELYS_THYROID_CANCER_UP	376	-0.19061	-0.864746	0.848739	0.959016	1	5535	tags=24%, list=25%, signal=32%
HOLLEMAN_VINCRISTINE_RESISTANCE_B_ALL_UP	31	-0.275181	-0.864153	0.677368	0.959812	1	2649	tags=23%, list=12%, signal=26%
RUAN_RESPONSE_TO_TNF_UP	11	-0.365442	-0.864054	0.650647	0.959439	1	1775	tags=18%, list=8%, signal=20%
OUELLET_OVARIAN_CANCER_INVASIVE_VS_LMP_DN	9	-0.384402	-0.862747	0.65096	0.961938	1	9302	tags=67%, list=42%, signal=116%
DUTERTRE_ESTRADIOL_RESPONSE_24HR_DN	389	-0.191331	-0.862615	0.861446	0.961619	1	5524	tags=25%, list=25%, signal=33%
VALK_AML_CLUSTER_4	21	-0.290736	-0.862362	0.645485	0.961614	1	1620	tags=14%, list=7%, signal=15%
KIM_GERMINAL_CENTER_T_HELPER_UP	51	-0.24616	-0.862262	0.710843	0.961251	1	6965	tags=33%, list=32%, signal=49%
WHITESIDE_CISPLATIN_RESISTANCE_UP	11	-0.349627	-0.86199	0.647863	0.961295	1	792	tags=18%, list=4%, signal=19%
NIELSEN_MALIGNAT_FIBROUS_HISTIOCYTOMA_UP	16	-0.321281	-0.861801	0.644781	0.961105	1	3253	tags=31%, list=15%, signal=37%
MCCOLLUM_GELDANAMYCIN_RESISTANCE_UP	9	-0.383314	-0.860561	0.648649	0.963304	1	2215	tags=22%, list=10%, signal=25%
ZHENG_IL22_SIGNALING_UP	45	-0.251428	-0.86056	0.707547	0.96269	1	1492	tags=13%, list=7%, signal=14%
SHIPP_DLBCL_CURED_VS_FATAL_UP	31	-0.274572	-0.860237	0.674617	0.962846	1	6239	tags=39%, list=29%, signal=54%
DELASERNA_TARGETS_OF_MYOD_AND_SMARCA4	11	-0.35533	-0.859119	0.632799	0.964865	1	1160	tags=18%, list=5%, signal=19%
DAVICIONI_PAX_FOXO1_SIGNATURE_IN_ARMS_DN	17	-0.313042	-0.858849	0.648026	0.964852	1	473	tags=12%, list=2%, signal=12%
YAO_TEMPORAL_RESPONSE_TO_PROGESTERONE_CLUSTER_6	58	-0.244271	-0.858403	0.69764	0.965252	1	3285	tags=19%, list=15%, signal=22%
KASLER_HDAC7_TARGETS_2_DN	27	-0.278034	-0.858297	0.686084	0.964886	1	7255	tags=52%, list=33%, signal=77%
ZHAN_MULTIPLE_MYELOMA_HP_DN	35	-0.264777	-0.857498	0.679661	0.966085	1	4494	tags=23%, list=21%, signal=29%
SCHRAMM_INHBA_TARGETS_DN	22	-0.293522	-0.85703	0.666134	0.966536	1	5590	tags=32%, list=26%, signal=43%
CHARAFE_BREAST_CANCER_BASAL_VS_MESENCHYMAL_DN	40	-0.261963	-0.856922	0.681402	0.966163	1	3343	tags=23%, list=15%, signal=27%
NUYTTEN_NIPP1_TARGETS_DN	634	-0.182384	-0.855772	0.911111	0.968183	1	6454	tags=26%, list=29%, signal=36%
FIGUEROA_AML_METHYLATION_CLUSTER_5_UP	9	-0.371835	-0.855236	0.642234	0.968785	1	7459	tags=56%, list=34%, signal=84%
IVANOVA_HEMATOPOIESIS_STEM_CELL	200	-0.201318	-0.85499	0.815013	0.968712	1	6370	tags=32%, list=29%, signal=45%
MORI_PLASMA_CELL_UP	37	-0.262385	-0.85458	0.703762	0.969069	1	1525	tags=11%, list=7%, signal=12%
MATZUK_MEIOTIC_AND_DNA_REPAIR	34	-0.271308	-0.854295	0.69279	0.969098	1	6199	tags=35%, list=28%, signal=49%
SENESE_HDAC3_TARGETS_UP	392	-0.186765	-0.854042	0.890201	0.969076	1	7208	tags=32%, list=33%, signal=47%
SHETH_LIVER_CANCER_VS_TXNIP_LOSS_PAM3	62	-0.237069	-0.853889	0.712798	0.968815	1	2812	tags=18%, list=13%, signal=20%
GOLUB_ALL_VS_AML_UP	24	-0.292131	-0.852697	0.6816	0.970878	1	5720	tags=25%, list=26%, signal=34%
LIN_MELANOMA_COPY_NUMBER_UP	57	-0.243736	-0.85261	0.733432	0.970473	1	6605	tags=32%, list=30%, signal=45%
DASU_IL6_SIGNALING_SCAR_DN	12	-0.345642	-0.85171	0.670628	0.971908	1	2808	tags=33%, list=13%, signal=38%
BILANGES_SERUM_SENSITIVE_VIA_TSC1	20	-0.303045	-0.851422	0.684375	0.971962	1	473	tags=10%, list=2%, signal=10%
LEE_METASTASIS_AND_ALTERNATIVE_SPLICING_UP	67	-0.235601	-0.85059	0.74269	0.973191	1	3343	tags=19%, list=15%, signal=23%
LIU_PROSTATE_CANCER_UP	68	-0.233012	-0.850544	0.737405	0.972679	1	6597	tags=34%, list=30%, signal=48%
DELACROIX_RARG_BOUND_MEF	306	-0.189907	-0.849828	0.87037	0.973679	1	4095	tags=15%, list=19%, signal=19%
OLSSON_E2F3_TARGETS_UP	19	-0.302926	-0.848866	0.678869	0.975228	1	5951	tags=37%, list=27%, signal=51%
LOPEZ_MBD_TARGETS	738	-0.18015	-0.848428	0.92936	0.975549	1	5733	tags=22%, list=26%, signal=28%
FORTSCHEGGER_PHF8_TARGETS_DN	577	-0.182063	-0.848258	0.915254	0.975324	1	6478	tags=29%, list=30%, signal=41%
GUENTHER_GROWTH_SPHERICAL_VS_ADHERENT_DN	24	-0.285601	-0.847966	0.668277	0.975366	1	6520	tags=33%, list=30%, signal=47%
HERNANDEZ_MITOTIC_ARREST_BY_DOCETAXEL_2_DN	14	-0.322548	-0.847334	0.678261	0.976133	1	3227	tags=29%, list=15%, signal=33%
RODRIGUES_NTN1_TARGETS_DN	126	-0.208858	-0.847015	0.785007	0.976229	1	4455	tags=21%, list=20%, signal=27%
GRAESSMANN_APOPTOSIS_BY_DOXORUBICIN_UP	897	-0.177187	-0.846908	0.947594	0.975825	1	4847	tags=20%, list=22%, signal=25%
OKAMOTO_LIVER_CANCER_MULTICENTRIC_OCCURRENCE_UP	19	-0.303079	-0.846904	0.689537	0.975219	1	6389	tags=37%, list=29%, signal=52%
GABRIELY_MIR21_TARGETS	223	-0.195293	-0.846484	0.846561	0.975508	1	6621	tags=31%, list=30%, signal=45%
GROSS_HYPOXIA_VIA_HIF1A_ONLY	7	-0.405657	-0.846478	0.673321	0.974905	1	4541	tags=43%, list=21%, signal=54%
GOTTWEIN_TARGETS_OF_KSHV_MIR_K12_11	48	-0.245224	-0.846391	0.732824	0.974491	1	2982	tags=17%, list=14%, signal=19%
VALK_AML_CLUSTER_5	21	-0.29392	-0.846066	0.698206	0.974594	1	4558	tags=38%, list=21%, signal=48%
TESAR_ALK_AND_JAK_TARGETS_MOUSE_ES_D4_UP	5	-0.433102	-0.845141	0.686275	0.976007	1	1991	tags=40%, list=9%, signal=44%
JAZAG_TGFB1_SIGNALING_VIA_SMAD4_DN	52	-0.243295	-0.845124	0.715856	0.975432	1	4470	tags=27%, list=20%, signal=34%
MOREIRA_RESPONSE_TO_TSA_UP	26	-0.282154	-0.844939	0.703448	0.975212	1	3684	tags=23%, list=17%, signal=28%
HOSHIDA_LIVER_CANCER_SUBCLASS_S2	102	-0.216207	-0.844296	0.765988	0.976046	1	7211	tags=32%, list=33%, signal=48%
FINETTI_BREAST_CANCER_KINOME_RED	15	-0.322793	-0.843916	0.680484	0.976272	1	420	tags=7%, list=2%, signal=7%
ZIRN_TRETINOIN_RESPONSE_UP	15	-0.319504	-0.843488	0.673203	0.976543	1	3462	tags=27%, list=16%, signal=32%
GREENBAUM_E2A_TARGETS_UP	30	-0.268397	-0.842184	0.712948	0.978761	1	3356	tags=17%, list=15%, signal=20%
OXFORD_RALA_AND_RALB_TARGETS_UP	7	-0.394231	-0.842028	0.688931	0.978471	1	3830	tags=43%, list=17%, signal=52%
SIMBULAN_PARP1_TARGETS_UP	30	-0.273863	-0.841837	0.710731	0.978271	1	5453	tags=33%, list=25%, signal=44%
ZHAN_MULTIPLE_MYELOMA_PR_UP	31	-0.266561	-0.841366	0.703762	0.978688	1	420	tags=6%, list=2%, signal=7%
MORI_LARGE_PRE_BII_LYMPHOCYTE_UP	76	-0.222388	-0.840825	0.78955	0.979268	1	6708	tags=24%, list=31%, signal=34%
MCCABE_BOUND_BY_HOXC6	263	-0.191289	-0.840524	0.880196	0.979299	1	3075	tags=14%, list=14%, signal=16%
CREIGHTON_ENDOCRINE_THERAPY_RESISTANCE_4	224	-0.194003	-0.840032	0.874834	0.979758	1	2363	tags=12%, list=11%, signal=13%
WUNDER_INFLAMMATORY_RESPONSE_AND_CHOLESTEROL_DN	7	-0.402783	-0.839983	0.66436	0.979253	1	2803	tags=29%, list=13%, signal=33%
SESTO_RESPONSE_TO_UV_C5	42	-0.250689	-0.839106	0.742902	0.980546	1	2241	tags=12%, list=10%, signal=13%
KIM_MYCL1_AMPLIFICATION_TARGETS_UP	11	-0.341273	-0.838687	0.672913	0.980843	1	2033	tags=18%, list=9%, signal=20%
STEIN_ESRRA_TARGETS	401	-0.183102	-0.838491	0.917062	0.980655	1	4812	tags=18%, list=22%, signal=23%
GRASEMANN_RETINOBLASTOMA_WITH_6P_AMPLIFICATION	11	-0.34504	-0.837782	0.694097	0.981544	1	8152	tags=55%, list=37%, signal=87%
KONG_E2F1_TARGETS	10	-0.358905	-0.837523	0.665535	0.981506	1	4508	tags=40%, list=21%, signal=50%
VANHARANTA_UTERINE_FIBROID_WITH_7Q_DELETION_UP	52	-0.241973	-0.836933	0.734043	0.982116	1	1488	tags=6%, list=7%, signal=6%
ODONNELL_METASTASIS_UP	62	-0.233154	-0.836886	0.752199	0.981606	1	1642	tags=13%, list=8%, signal=14%
MOOTHA_VOXPHOS	77	-0.224638	-0.836754	0.766214	0.981294	1	10969	tags=65%, list=50%, signal=130%
MARTORIATI_MDM4_TARGETS_FETAL_LIVER_DN	435	-0.181135	-0.83647	0.915888	0.981314	1	6708	tags=26%, list=31%, signal=37%
OLSSON_E2F3_TARGETS_DN	34	-0.259522	-0.835982	0.716858	0.981717	1	4024	tags=21%, list=18%, signal=25%
DURAND_STROMA_MAX_DN	116	-0.206775	-0.835848	0.831921	0.981383	1	4732	tags=22%, list=22%, signal=28%
AZARE_STAT3_TARGETS	17	-0.307577	-0.835443	0.714286	0.981623	1	1637	tags=18%, list=7%, signal=19%
MARTINEZ_RB1_TARGETS_UP	563	-0.179265	-0.835207	0.940463	0.981501	1	5015	tags=22%, list=23%, signal=28%
SARRIO_EPITHELIAL_MESENCHYMAL_TRANSITION_DN	123	-0.207372	-0.835198	0.810393	0.980911	1	5057	tags=26%, list=23%, signal=34%
GOUYER_TUMOR_INVASIVENESS	6	-0.406752	-0.834989	0.657244	0.980741	1	5104	tags=50%, list=23%, signal=65%
ZHAN_MULTIPLE_MYELOMA_PR_DN	35	-0.262219	-0.834597	0.724728	0.980929	1	5399	tags=26%, list=25%, signal=34%
CHIN_BREAST_CANCER_COPY_NUMBER_DN	12	-0.338196	-0.834548	0.681356	0.980433	1	304	tags=8%, list=1%, signal=8%
BROWNE_HCMV_INFECTION_4HR_DN	194	-0.196087	-0.833851	0.846452	0.981263	1	4809	tags=22%, list=22%, signal=28%
SCIAN_CELL_CYCLE_TARGETS_OF_TP53_AND_TP73_DN	22	-0.290219	-0.833601	0.705491	0.981191	1	7915	tags=41%, list=36%, signal=64%
ROSS_AML_WITH_AML1_ETO_FUSION	58	-0.234127	-0.833578	0.75975	0.980631	1	3549	tags=19%, list=16%, signal=23%
BHATI_G2M_ARREST_BY_2METHOXYESTRADIOL_UP	92	-0.216393	-0.833532	0.78125	0.980124	1	4966	tags=23%, list=23%, signal=29%
LIU_SOX4_TARGETS_UP	107	-0.210778	-0.833427	0.809192	0.979745	1	4028	tags=19%, list=18%, signal=23%
NIKOLSKY_BREAST_CANCER_20Q12_Q13_AMPLICON	96	-0.213965	-0.832923	0.819602	0.980171	1	2463	tags=13%, list=11%, signal=14%
SCHWAB_TARGETS_OF_BMYB_POLYMORPHIC_VARIANTS_UP	12	-0.336108	-0.832546	0.692718	0.980323	1	7495	tags=42%, list=34%, signal=63%
KLEIN_PRIMARY_EFFUSION_LYMPHOMA_UP	47	-0.24195	-0.831439	0.747384	0.981958	1	4358	tags=23%, list=20%, signal=29%
KONDO_COLON_CANCER_HCP_WITH_H3K27ME1	20	-0.29588	-0.831067	0.696574	0.982143	1	3657	tags=25%, list=17%, signal=30%
ACEVEDO_LIVER_CANCER_WITH_H3K9ME3_DN	54	-0.236648	-0.830965	0.768532	0.981756	1	5455	tags=28%, list=25%, signal=37%
FAELT_B_CLL_WITH_VH_REARRANGEMENTS_UP	38	-0.25345	-0.830728	0.742811	0.981631	1	6050	tags=34%, list=28%, signal=47%
PURBEY_TARGETS_OF_CTBP1_AND_SATB1_DN	145	-0.19998	-0.830324	0.840621	0.981863	1	5951	tags=26%, list=27%, signal=36%
TING_SILENCED_BY_DICER	22	-0.286621	-0.829461	0.703822	0.983045	1	2416	tags=23%, list=11%, signal=26%
CREIGHTON_ENDOCRINE_THERAPY_RESISTANCE_5	345	-0.183703	-0.828742	0.923077	0.983959	1	5001	tags=22%, list=23%, signal=28%
GAZDA_DIAMOND_BLACKFAN_ANEMIA_MYELOID_UP	22	-0.290491	-0.828538	0.725589	0.98375	1	6504	tags=45%, list=30%, signal=65%
MATZUK_PREOVULATORY_FOLLICLE	9	-0.355629	-0.828321	0.708405	0.983574	1	206	tags=11%, list=1%, signal=11%
DAIRKEE_TERT_TARGETS_UP	286	-0.18666	-0.828245	0.901935	0.983141	1	4952	tags=20%, list=23%, signal=25%
CHANGOLKAR_H2AFY_TARGETS_DN	32	-0.261029	-0.827486	0.737089	0.984058	1	2095	tags=16%, list=10%, signal=17%
SAMOLS_TARGETS_OF_KHSV_MIRNAS_UP	7	-0.388192	-0.826874	0.676976	0.984663	1	5662	tags=57%, list=26%, signal=77%
GAL_LEUKEMIC_STEM_CELL_DN	175	-0.193932	-0.825249	0.870494	0.987291	1	4872	tags=21%, list=22%, signal=26%
JAZAG_TGFB1_SIGNALING_UP	88	-0.215458	-0.824951	0.803545	0.987267	1	4651	tags=20%, list=21%, signal=26%
WALLACE_JAK2_TARGETS_UP	17	-0.300428	-0.824676	0.713542	0.987225	1	5869	tags=35%, list=27%, signal=48%
POMEROY_MEDULLOBLASTOMA_PROGNOSIS_UP	40	-0.248456	-0.824534	0.757098	0.986899	1	3738	tags=23%, list=17%, signal=27%
ZHU_CMV_24_HR_UP	76	-0.220299	-0.824483	0.781977	0.986405	1	1607	tags=9%, list=7%, signal=10%
ROME_INSULIN_TARGETS_IN_MUSCLE_UP	340	-0.184147	-0.824297	0.920441	0.986155	1	6209	tags=23%, list=28%, signal=31%
POTTI_TOPOTECAN_SENSITIVITY	105	-0.209634	-0.824247	0.812842	0.985656	1	6520	tags=33%, list=30%, signal=47%
ONGUSAHA_BRCA1_TARGETS_UP	12	-0.325053	-0.822387	0.692047	0.988722	1	2645	tags=17%, list=12%, signal=19%
ZHONG_SECRETOME_OF_LUNG_CANCER_AND_ENDOTHELIUM	57	-0.231878	-0.821737	0.756598	0.989372	1	3164	tags=16%, list=14%, signal=18%
OSWALD_HEMATOPOIETIC_STEM_CELL_IN_COLLAGEN_GEL_DN	198	-0.191126	-0.821555	0.87664	0.989143	1	6979	tags=32%, list=32%, signal=46%
HUANG_DASATINIB_RESISTANCE_DN	53	-0.235894	-0.821115	0.785822	0.98939	1	6224	tags=30%, list=28%, signal=42%
NAGASHIMA_NRG1_SIGNALING_DN	40	-0.246731	-0.820723	0.771739	0.989583	1	4725	tags=33%, list=22%, signal=41%
SWEET_KRAS_TARGETS_UP	72	-0.220433	-0.82006	0.787037	0.990243	1	3508	tags=18%, list=16%, signal=21%
BILD_CTNNB1_ONCOGENIC_SIGNATURE	55	-0.230441	-0.819877	0.786982	0.989991	1	7615	tags=38%, list=35%, signal=58%
SHEDDEN_LUNG_CANCER_GOOD_SURVIVAL_A12	212	-0.191481	-0.819653	0.895349	0.989822	1	5007	tags=23%, list=23%, signal=29%
GARGALOVIC_RESPONSE_TO_OXIDIZED_PHOSPHOLIPIDS_GREEN_DN	20	-0.29395	-0.818739	0.709302	0.991	1	406	tags=10%, list=2%, signal=10%
YIH_RESPONSE_TO_ARSENITE_C5	9	-0.361882	-0.818694	0.710069	0.99049	1	4482	tags=33%, list=20%, signal=42%
ZWANG_CLASS_2_TRANSIENTLY_INDUCED_BY_EGF	39	-0.254092	-0.818273	0.759434	0.99074	1	2844	tags=18%, list=13%, signal=21%
HOEGERKORP_CD44_TARGETS_TEMPORAL_DN	21	-0.28552	-0.817816	0.752459	0.991027	1	4541	tags=24%, list=21%, signal=30%
MURATA_VIRULENCE_OF_H_PILORI	20	-0.289702	-0.817777	0.725807	0.990507	1	3343	tags=25%, list=15%, signal=29%
KOINUMA_COLON_CANCER_MSI_UP	6	-0.411171	-0.817454	0.708405	0.990506	1	807	tags=17%, list=4%, signal=17%
POTTI_ETOPOSIDE_SENSITIVITY	32	-0.258147	-0.816103	0.742236	0.992491	1	3093	tags=19%, list=14%, signal=22%
MIDORIKAWA_AMPLIFIED_IN_LIVER_CANCER	36	-0.256174	-0.816031	0.7504	0.99202	1	3405	tags=17%, list=16%, signal=20%
SHANK_TAL1_TARGETS_DN	10	-0.353254	-0.815637	0.73494	0.992154	1	3097	tags=20%, list=14%, signal=23%
ONKEN_UVEAL_MELANOMA_UP	597	-0.174657	-0.81554	0.959368	0.99174	1	5104	tags=19%, list=23%, signal=24%
BRUECKNER_TARGETS_OF_MIRLET7A3_DN	58	-0.229992	-0.815292	0.793985	0.991625	1	4847	tags=28%, list=22%, signal=35%
OSMAN_BLADDER_CANCER_DN	270	-0.186159	-0.814934	0.903266	0.991714	1	7685	tags=28%, list=35%, signal=43%
IWANAGA_CARCINOGENESIS_BY_KRAS_DN	95	-0.209471	-0.814594	0.846847	0.991786	1	5418	tags=25%, list=25%, signal=33%
YOSHIOKA_LIVER_CANCER_EARLY_RECURRENCE_DN	45	-0.23579	-0.814539	0.77496	0.99129	1	1792	tags=13%, list=8%, signal=14%
WATANABE_COLON_CANCER_MSI_VS_MSS_UP	22	-0.280861	-0.813573	0.734242	0.992547	1	7113	tags=36%, list=32%, signal=54%
LUI_THYROID_CANCER_PAX8_PPARG_DN	36	-0.250022	-0.812557	0.765391	0.993867	1	4318	tags=14%, list=20%, signal=17%
RICKMAN_TUMOR_DIFFERENTIATED_WELL_VS_POORLY_UP	170	-0.193443	-0.81251	0.874324	0.993366	1	1966	tags=9%, list=9%, signal=10%
MODY_HIPPOCAMPUS_POSTNATAL	59	-0.228163	-0.812359	0.795491	0.99305	1	4114	tags=22%, list=19%, signal=27%
VISALA_AGING_LYMPHOCYTE_UP	6	-0.392657	-0.811977	0.705009	0.99318	1	5799	tags=50%, list=26%, signal=68%
ZHONG_RESPONSE_TO_AZACITIDINE_AND_TSA_UP	137	-0.197174	-0.809283	0.878706	0.997535	1	4951	tags=23%, list=23%, signal=29%
RAY_TARGETS_OF_P210_BCR_ABL_FUSION_DN	14	-0.314506	-0.808991	0.721854	0.997465	1	2702	tags=21%, list=12%, signal=24%
HILLION_HMGA1B_TARGETS	87	-0.212796	-0.808661	0.832361	0.997434	1	2750	tags=11%, list=13%, signal=13%
GROSS_HYPOXIA_VIA_ELK3_UP	177	-0.19131	-0.808474	0.885677	0.997176	1	7402	tags=32%, list=34%, signal=48%
MIZUSHIMA_AUTOPHAGOSOME_FORMATION	15	-0.304773	-0.808033	0.713523	0.9974	1	9443	tags=47%, list=43%, signal=82%
LIU_VAV3_PROSTATE_CARCINOGENESIS_DN	15	-0.307961	-0.80709	0.744425	0.998514	1	4250	tags=40%, list=19%, signal=50%
CAMPS_COLON_CANCER_COPY_NUMBER_DN	26	-0.268509	-0.806299	0.771875	0.999333	1	4981	tags=27%, list=23%, signal=35%
NIKOLSKY_BREAST_CANCER_8Q12_Q22_AMPLICON	94	-0.211557	-0.806221	0.845506	0.998874	1	4068	tags=20%, list=19%, signal=25%
HASINA_NOL7_TARGETS_DN	11	-0.337326	-0.806145	0.725888	0.998412	1	4820	tags=36%, list=22%, signal=47%
YAMAZAKI_TCEB3_TARGETS_UP	156	-0.194527	-0.805671	0.886515	0.99867	1	5414	tags=24%, list=25%, signal=32%
BASSO_CD40_SIGNALING_UP	82	-0.214654	-0.804581	0.823529	0.999974	1	4817	tags=26%, list=22%, signal=33%
KAAB_FAILED_HEART_ATRIUM_UP	31	-0.256506	-0.804004	0.756329	1	1	1834	tags=10%, list=8%, signal=11%
DAZARD_UV_RESPONSE_CLUSTER_G1	56	-0.226489	-0.801803	0.811852	1	1	3615	tags=16%, list=17%, signal=19%
VALK_AML_CLUSTER_6	24	-0.270417	-0.801745	0.76699	1	1	4724	tags=29%, list=22%, signal=37%
ADDYA_ERYTHROID_DIFFERENTIATION_BY_HEMIN	61	-0.221302	-0.801025	0.80303	1	1	2775	tags=13%, list=13%, signal=15%
OSADA_ASCL1_TARGETS_DN	23	-0.27136	-0.801004	0.784441	1	1	5402	tags=35%, list=25%, signal=46%
SCHLOSSER_SERUM_RESPONSE_DN	560	-0.171469	-0.800899	0.97709	1	1	4974	tags=16%, list=23%, signal=21%
LEIN_OLIGODENDROCYTE_MARKERS	60	-0.22476	-0.800303	0.806306	1	1	6116	tags=32%, list=28%, signal=44%
ZHENG_FOXP3_TARGETS_IN_THYMUS_UP	148	-0.194689	-0.799779	0.911846	1	1	7100	tags=31%, list=32%, signal=46%
SHIN_B_CELL_LYMPHOMA_CLUSTER_7	27	-0.263426	-0.798724	0.776714	1	1	7456	tags=41%, list=34%, signal=62%
PEDERSEN_TARGETS_OF_611CTF_ISOFORM_OF_ERBB2	58	-0.223975	-0.798247	0.823529	1	1	6587	tags=43%, list=30%, signal=61%
GUTIERREZ_WALDENSTROEMS_MACROGLOBULINEMIA_1_DN	7	-0.378802	-0.798129	0.715054	1	1	3183	tags=43%, list=15%, signal=50%
TAVOR_CEBPA_TARGETS_UP	44	-0.241228	-0.797976	0.788618	1	1	4017	tags=23%, list=18%, signal=28%
IGLESIAS_E2F_TARGETS_DN	15	-0.299479	-0.797053	0.757092	1	1	5053	tags=40%, list=23%, signal=52%
LEE_TARGETS_OF_PTCH1_AND_SUFU_DN	44	-0.236587	-0.796995	0.792512	1	1	2287	tags=14%, list=10%, signal=15%
DACOSTA_UV_RESPONSE_VIA_ERCC3_TTD_DN	62	-0.221266	-0.796973	0.845697	1	1	3374	tags=18%, list=15%, signal=21%
SILIGAN_TARGETS_OF_EWS_FLI1_FUSION_UP	11	-0.325802	-0.796386	0.710218	1	1	6658	tags=36%, list=30%, signal=52%
FRASOR_TAMOXIFEN_RESPONSE_UP	38	-0.243505	-0.796383	0.806299	1	1	1911	tags=13%, list=9%, signal=14%
JI_METASTASIS_REPRESSED_BY_STK11	23	-0.275086	-0.796306	0.7824	1	1	473	tags=9%, list=2%, signal=9%
PECE_MAMMARY_STEM_CELL_UP	106	-0.20254	-0.796263	0.875683	1	1	6637	tags=34%, list=30%, signal=49%
JOHNSTONE_PARVB_TARGETS_2_DN	256	-0.181441	-0.796206	0.951005	1	1	6720	tags=30%, list=31%, signal=43%
ALONSO_METASTASIS_DN	21	-0.27799	-0.795229	0.765289	1	1	4618	tags=29%, list=21%, signal=36%
BROWNE_HCMV_INFECTION_6HR_DN	131	-0.19633	-0.794627	0.900277	1	1	7547	tags=33%, list=34%, signal=50%
NAKAMURA_TUMOR_ZONE_PERIPHERAL_VS_CENTRAL_UP	211	-0.185556	-0.793827	0.918136	1	1	2825	tags=12%, list=13%, signal=13%
WANG_NFKB_TARGETS	20	-0.279714	-0.793781	0.736318	1	1	3605	tags=25%, list=16%, signal=30%
GRAHAM_CML_QUIESCENT_VS_NORMAL_DIVIDING_UP	44	-0.233484	-0.793725	0.803254	1	1	4901	tags=27%, list=22%, signal=35%
HAMAI_APOPTOSIS_VIA_TRAIL_UP	444	-0.172257	-0.793584	0.967626	1	1	6188	tags=23%, list=28%, signal=32%
FLECHNER_PBL_KIDNEY_TRANSPLANT_OK_VS_DONOR_DN	35	-0.247392	-0.792999	0.786834	1	1	3254	tags=14%, list=15%, signal=17%
BILBAN_B_CLL_LPL_UP	50	-0.228847	-0.7926	0.835052	1	1	4026	tags=20%, list=18%, signal=24%
ZEMBUTSU_SENSITIVITY_TO_CYCLOPHOSPHAMIDE	15	-0.301983	-0.792522	0.75	1	1	1669	tags=13%, list=8%, signal=14%
BOYLAN_MULTIPLE_MYELOMA_C_CLUSTER_UP	32	-0.252977	-0.792462	0.794953	1	1	1969	tags=13%, list=9%, signal=14%
MIKKELSEN_ES_HCP_WITH_H3_UNMETHYLATED	46	-0.233902	-0.791826	0.800609	1	1	5157	tags=28%, list=24%, signal=37%
MILI_PSEUDOPODIA_CHEMOTAXIS_DN	382	-0.173799	-0.791825	0.967857	1	1	4450	tags=17%, list=20%, signal=21%
RADAEVA_RESPONSE_TO_IFNA1_DN	7	-0.378799	-0.791378	0.727116	1	1	737	tags=14%, list=3%, signal=15%
DAVICIONI_MOLECULAR_ARMS_VS_ERMS_UP	258	-0.181243	-0.7906	0.954264	1	1	4858	tags=21%, list=22%, signal=27%
NUYTTEN_NIPP1_TARGETS_UP	515	-0.170367	-0.790594	0.981395	1	1	7186	tags=32%, list=33%, signal=46%
ZHENG_GLIOBLASTOMA_PLASTICITY_DN	54	-0.225289	-0.79053	0.807631	1	1	3584	tags=19%, list=16%, signal=22%
SAENZ_DETOX_PATHWAY_AND_CARCINOGENESIS_DN	8	-0.359153	-0.790264	0.735593	1	1	5618	tags=50%, list=26%, signal=67%
HOFMANN_MYELODYSPLASTIC_SYNDROM_LOW_RISK_UP	17	-0.288669	-0.789983	0.766551	1	1	4313	tags=29%, list=20%, signal=37%
IVANOVA_HEMATOPOIESIS_LATE_PROGENITOR	400	-0.17394	-0.789914	0.968523	1	1	5756	tags=24%, list=26%, signal=31%
MENSE_HYPOXIA_UP	68	-0.216808	-0.789698	0.840537	1	1	1692	tags=12%, list=8%, signal=13%
DAZARD_RESPONSE_TO_UV_SCC_DN	96	-0.206779	-0.789186	0.879412	1	1	6605	tags=29%, list=30%, signal=42%
JAZAG_TGFB1_SIGNALING_VIA_SMAD4_UP	86	-0.208187	-0.788677	0.862267	1	1	7285	tags=33%, list=33%, signal=49%
KREPPEL_CD99_TARGETS_DN	7	-0.366427	-0.787689	0.751351	1	1	509	tags=14%, list=2%, signal=15%
MEDINA_SMARCA4_TARGETS	34	-0.244312	-0.786266	0.791191	1	1	4864	tags=24%, list=22%, signal=30%
CHNG_MULTIPLE_MYELOMA_HYPERPLOID_UP	41	-0.239347	-0.78564	0.817054	1	1	14479	tags=98%, list=66%, signal=288%
AMUNDSON_GAMMA_RADIATION_RESISTANCE	17	-0.288696	-0.785298	0.761017	1	1	3105	tags=24%, list=14%, signal=27%
BYSTRYKH_HEMATOPOIESIS_STEM_CELL_QTL_TRANS	749	-0.165284	-0.785198	0.997812	1	1	3153	tags=13%, list=14%, signal=15%
KYNG_DNA_DAMAGE_DN	166	-0.18727	-0.78476	0.914634	1	1	3858	tags=16%, list=18%, signal=19%
MARIADASON_RESPONSE_TO_BUTYRATE_SULINDAC_6	38	-0.242278	-0.7847	0.825746	1	1	4848	tags=24%, list=22%, signal=30%
WANG_CLIM2_TARGETS_DN	135	-0.192989	-0.78458	0.905149	1	1	6808	tags=30%, list=31%, signal=44%
DOANE_RESPONSE_TO_ANDROGEN_UP	133	-0.195007	-0.78457	0.893918	1	1	3077	tags=14%, list=14%, signal=16%
TURASHVILI_BREAST_DUCTAL_CARCINOMA_VS_LOBULAR_NORMAL_UP	54	-0.223693	-0.783518	0.831325	1	1	2416	tags=13%, list=11%, signal=15%
WEST_ADRENOCORTICAL_CARCINOMA_VS_ADENOMA_UP	13	-0.311489	-0.782449	0.758741	1	1	80	tags=8%, list=0%, signal=8%
MONTERO_THYROID_CANCER_POOR_SURVIVAL_UP	12	-0.313216	-0.782259	0.75	1	1	7734	tags=42%, list=35%, signal=64%
WONG_IFNA2_RESISTANCE_DN	26	-0.260632	-0.781525	0.774141	1	1	6147	tags=35%, list=28%, signal=48%
MARSON_FOXP3_TARGETS_STIMULATED_DN	8	-0.348287	-0.780867	0.746503	1	1	4189	tags=38%, list=19%, signal=46%
WANG_LMO4_TARGETS_UP	258	-0.178758	-0.780259	0.950122	1	1	5697	tags=23%, list=26%, signal=31%
SU_TESTIS	61	-0.215438	-0.779699	0.866868	1	1	6579	tags=30%, list=30%, signal=42%
BROWNE_HCMV_INFECTION_20HR_UP	181	-0.186417	-0.779435	0.931398	1	1	5966	tags=25%, list=27%, signal=34%
ACEVEDO_NORMAL_TISSUE_ADJACENT_TO_LIVER_TUMOR_UP	127	-0.193979	-0.779339	0.909341	1	1	1935	tags=9%, list=9%, signal=9%
SHETH_LIVER_CANCER_VS_TXNIP_LOSS_PAM6	37	-0.243677	-0.778743	0.79052	1	1	4498	tags=27%, list=21%, signal=34%
BROWNE_HCMV_INFECTION_14HR_DN	240	-0.178558	-0.778616	0.958069	1	1	4285	tags=18%, list=20%, signal=23%
PATIL_LIVER_CANCER	563	-0.1678	-0.778187	0.992231	1	1	2808	tags=11%, list=13%, signal=12%
YANAGIHARA_ESX1_TARGETS	27	-0.256488	-0.777732	0.806402	1	1	6205	tags=30%, list=28%, signal=41%
GYORFFY_MITOXANTRONE_RESISTANCE	43	-0.231437	-0.775635	0.8336	1	1	5906	tags=30%, list=27%, signal=41%
ACEVEDO_LIVER_TUMOR_VS_NORMAL_ADJACENT_TISSUE_UP	632	-0.164982	-0.774555	0.996614	1	1	3076	tags=11%, list=14%, signal=13%
JOHNSTONE_PARVB_TARGETS_1_DN	39	-0.236688	-0.774517	0.836039	1	1	6461	tags=33%, list=30%, signal=47%
BENPORATH_OCT4_TARGETS	232	-0.179026	-0.774402	0.955128	1	1	7277	tags=36%, list=33%, signal=54%
BURTON_ADIPOGENESIS_9	82	-0.20214	-0.773452	0.897038	1	1	6180	tags=35%, list=28%, signal=49%
HOEGERKORP_CD44_TARGETS_TEMPORAL_UP	10	-0.324454	-0.772939	0.76007	1	1	7580	tags=50%, list=35%, signal=76%
HOLLEMAN_PREDNISOLONE_RESISTANCE_B_ALL_UP	18	-0.277193	-0.772889	0.785223	1	1	7317	tags=28%, list=33%, signal=42%
ODONNELL_METASTASIS_DN	19	-0.283402	-0.77209	0.793103	1	1	6131	tags=37%, list=28%, signal=51%
KYNG_ENVIRONMENTAL_STRESS_RESPONSE_NOT_BY_UV_IN_WS	9	-0.34172	-0.770721	0.759868	1	1	795	tags=11%, list=4%, signal=12%
SASAKI_TARGETS_OF_TP73_AND_TP63	8	-0.347469	-0.770539	0.752151	1	1	1163	tags=25%, list=5%, signal=26%
GAJATE_RESPONSE_TO_TRABECTEDIN_UP	59	-0.213748	-0.770255	0.852174	1	1	2645	tags=15%, list=12%, signal=17%
DOUGLAS_BMI1_TARGETS_DN	237	-0.177029	-0.76955	0.964377	1	1	6218	tags=29%, list=28%, signal=40%
SCHURINGA_STAT5A_TARGETS_UP	14	-0.303906	-0.769527	0.769772	1	1	5598	tags=29%, list=26%, signal=38%
ZHAN_V2_LATE_DIFFERENTIATION_GENES	39	-0.233723	-0.767863	0.842949	1	1	5798	tags=26%, list=26%, signal=35%
PYEON_HPV_POSITIVE_TUMORS_UP	60	-0.212701	-0.766765	0.860248	1	1	2203	tags=12%, list=10%, signal=13%
HOFFMAN_CLOCK_TARGETS_DN	8	-0.345813	-0.766491	0.792487	1	1	5413	tags=50%, list=25%, signal=66%
MUELLER_COMMON_TARGETS_OF_AML_FUSIONS_DN	24	-0.259588	-0.765462	0.820919	1	1	2291	tags=13%, list=10%, signal=14%
DE_YY1_TARGETS_DN	83	-0.200502	-0.764942	0.881232	1	1	6623	tags=30%, list=30%, signal=43%
NAKAMURA_ADIPOGENESIS_EARLY_UP	50	-0.221635	-0.764836	0.869085	1	1	1246	tags=8%, list=6%, signal=8%
ZWANG_EGF_INTERVAL_DN	155	-0.183837	-0.763901	0.955285	1	1	6878	tags=33%, list=31%, signal=48%
PEART_HDAC_PROLIFERATION_CLUSTER_DN	68	-0.206889	-0.763667	0.877429	1	1	2185	tags=13%, list=10%, signal=15%
JAIN_NFKB_SIGNALING	64	-0.209899	-0.76337	0.890882	1	1	5698	tags=27%, list=26%, signal=36%
SWEET_LUNG_CANCER_KRAS_UP	399	-0.166196	-0.763337	0.991657	1	1	5158	tags=21%, list=24%, signal=27%
PASINI_SUZ12_TARGETS_DN	286	-0.173449	-0.763047	0.962785	1	1	3171	tags=14%, list=14%, signal=16%
WEBER_METHYLATED_HCP_IN_FIBROBLAST_UP	6	-0.377828	-0.762981	0.789381	1	1	6064	tags=50%, list=28%, signal=69%
RHEIN_ALL_GLUCOCORTICOID_THERAPY_DN	316	-0.169244	-0.761844	0.986699	1	1	1611	tags=6%, list=7%, signal=6%
MARIADASON_REGULATED_BY_HISTONE_ACETYLATION_DN	40	-0.230021	-0.761704	0.842105	1	1	5694	tags=33%, list=26%, signal=44%
ULE_SPLICING_VIA_NOVA2	36	-0.233599	-0.76051	0.858293	1	1	5929	tags=36%, list=27%, signal=49%
DING_LUNG_CANCER_MUTATED_SIGNIFICANTLY	26	-0.250782	-0.760362	0.806988	1	1	7330	tags=42%, list=33%, signal=64%
WANG_CLIM2_TARGETS_UP	175	-0.179818	-0.75996	0.957672	1	1	6232	tags=26%, list=28%, signal=36%
TOMLINS_METASTASIS_DN	17	-0.276523	-0.759037	0.79732	1	1	4339	tags=18%, list=20%, signal=22%
ABDELMOHSEN_ELAVL4_TARGETS	15	-0.282733	-0.758156	0.773869	1	1	2463	tags=13%, list=11%, signal=15%
DIRMEIER_LMP1_RESPONSE_LATE_DN	23	-0.262033	-0.757737	0.823432	1	1	2363	tags=13%, list=11%, signal=15%
TAVOR_CEBPA_TARGETS_DN	22	-0.265383	-0.757246	0.807107	1	1	5662	tags=45%, list=26%, signal=61%
SHEDDEN_LUNG_CANCER_GOOD_SURVIVAL_A4	152	-0.182193	-0.756982	0.94913	1	1	4531	tags=22%, list=21%, signal=27%
GENTILE_UV_RESPONSE_CLUSTER_D6	26	-0.253602	-0.756159	0.8128	1	1	8562	tags=50%, list=39%, signal=82%
VERHAAK_GLIOBLASTOMA_PRONEURAL	164	-0.181738	-0.755876	0.945839	1	1	6650	tags=29%, list=30%, signal=42%
ZHAN_V1_LATE_DIFFERENTIATION_GENES_UP	31	-0.236696	-0.754391	0.845161	1	1	8492	tags=48%, list=39%, signal=79%
KYNG_ENVIRONMENTAL_STRESS_RESPONSE_UP	49	-0.220582	-0.753339	0.878834	1	1	1734	tags=10%, list=8%, signal=11%
MULLIGHAN_NPM1_MUTATED_SIGNATURE_2_UP	105	-0.193937	-0.753014	0.933908	1	1	4946	tags=23%, list=23%, signal=29%
LUI_THYROID_CANCER_CLUSTER_2	31	-0.237253	-0.752776	0.858995	1	1	1119	tags=10%, list=5%, signal=10%
JIANG_HYPOXIA_NORMAL	249	-0.173512	-0.752371	0.984962	1	1	2145	tags=9%, list=10%, signal=10%
AMIT_EGF_RESPONSE_240_MCF10A	17	-0.275229	-0.751794	0.840278	1	1	1518	tags=18%, list=7%, signal=19%
GALLUZZI_PREVENT_MITOCHONDIAL_PERMEABILIZATION	21	-0.258994	-0.751675	0.830065	1	1	5524	tags=24%, list=25%, signal=32%
SHIN_B_CELL_LYMPHOMA_CLUSTER_8	35	-0.233169	-0.750846	0.821372	1	1	2419	tags=14%, list=11%, signal=16%
MARSON_BOUND_BY_FOXP3_STIMULATED	754	-0.158085	-0.750811	1	1	1	3323	tags=12%, list=15%, signal=14%
PASTURAL_RIZ1_TARGETS_DN	5	-0.391694	-0.750543	0.769231	1	1	6954	tags=60%, list=32%, signal=88%
MARTINEZ_RESPONSE_TO_TRABECTEDIN	42	-0.222037	-0.750531	0.864865	1	1	5786	tags=26%, list=26%, signal=36%
MOOTHA_PGC	358	-0.166748	-0.750428	0.994076	1	1	5232	tags=18%, list=24%, signal=24%
WEIGEL_OXIDATIVE_STRESS_BY_HNE_AND_TBH	55	-0.212174	-0.750172	0.88062	1	1	2694	tags=13%, list=12%, signal=14%
TONG_INTERACT_WITH_PTTG1	38	-0.228796	-0.749676	0.868078	1	1	646	tags=5%, list=3%, signal=5%
PANGAS_TUMOR_SUPPRESSION_BY_SMAD1_AND_SMAD5_DN	123	-0.184836	-0.749325	0.955163	1	1	2842	tags=11%, list=13%, signal=12%
MOOTHA_GLUCONEOGENESIS	26	-0.243569	-0.74926	0.852512	1	1	3347	tags=19%, list=15%, signal=23%
NADERI_BREAST_CANCER_PROGNOSIS_DN	18	-0.270927	-0.748917	0.816092	1	1	4715	tags=33%, list=22%, signal=42%
BROWNE_HCMV_INFECTION_16HR_UP	172	-0.177181	-0.748366	0.963661	1	1	7798	tags=35%, list=36%, signal=55%
WONG_MITOCHONDRIA_GENE_MODULE	197	-0.173146	-0.748107	0.969191	1	1	7934	tags=37%, list=36%, signal=57%
WILCOX_PRESPONSE_TO_ROGESTERONE_UP	110	-0.188865	-0.747676	0.938289	1	1	3595	tags=16%, list=16%, signal=19%
GAVIN_FOXP3_TARGETS_CLUSTER_T4	72	-0.203302	-0.745767	0.909763	1	1	708	tags=6%, list=3%, signal=6%
HAHTOLA_MYCOSIS_FUNGOIDES_DN	12	-0.299516	-0.745557	0.787053	1	1	3049	tags=17%, list=14%, signal=19%
MORI_EMU_MYC_LYMPHOMA_BY_ONSET_TIME_DN	16	-0.279374	-0.744922	0.807167	1	1	4200	tags=31%, list=19%, signal=39%
BURTON_ADIPOGENESIS_10	26	-0.247326	-0.744116	0.82968	1	1	2725	tags=15%, list=12%, signal=18%
GAUTSCHI_SRC_SIGNALING	7	-0.350718	-0.743984	0.764389	1	1	259	tags=14%, list=1%, signal=14%
GARGALOVIC_RESPONSE_TO_OXIDIZED_PHOSPHOLIPIDS_TURQUOISE_UP	59	-0.209365	-0.743869	0.898176	1	1	7510	tags=37%, list=34%, signal=57%
KAYO_AGING_MUSCLE_DN	108	-0.186875	-0.743402	0.940028	1	1	3018	tags=12%, list=14%, signal=14%
GNATENKO_PLATELET_SIGNATURE	35	-0.229934	-0.743395	0.881703	1	1	2727	tags=11%, list=12%, signal=13%
LEE_LIVER_CANCER	32	-0.232453	-0.743269	0.8438	1	1	4823	tags=25%, list=22%, signal=32%
XU_HGF_SIGNALING_NOT_VIA_AKT1_48HR_UP	32	-0.232688	-0.743057	0.865506	1	1	5864	tags=34%, list=27%, signal=47%
WONG_IFNA2_RESISTANCE_UP	14	-0.284247	-0.742183	0.8157	1	1	3035	tags=21%, list=14%, signal=25%
KASLER_HDAC7_TARGETS_1_UP	161	-0.179694	-0.741808	0.971467	1	1	5940	tags=29%, list=27%, signal=39%
LU_TUMOR_ENDOTHELIAL_MARKERS_DN	5	-0.381196	-0.74162	0.804143	1	1	2943	tags=40%, list=13%, signal=46%
VANHARANTA_UTERINE_FIBROID_DN	52	-0.215936	-0.741405	0.88537	1	1	4246	tags=21%, list=19%, signal=26%
BERENJENO_ROCK_SIGNALING_NOT_VIA_RHOA_DN	42	-0.221217	-0.738869	0.889561	1	1	2623	tags=12%, list=12%, signal=13%
FUJII_YBX1_TARGETS_UP	34	-0.235887	-0.738297	0.877049	1	1	6559	tags=35%, list=30%, signal=50%
ABBUD_LIF_SIGNALING_2_DN	5	-0.379774	-0.738018	0.799632	1	1	479	tags=20%, list=2%, signal=20%
GUTIERREZ_CHRONIC_LYMPHOCYTIC_LEUKEMIA_UP	10	-0.312268	-0.737844	0.803109	1	1	6705	tags=60%, list=31%, signal=86%
BYSTRYKH_HEMATOPOIESIS_STEM_CELL_QTL_CIS	99	-0.187473	-0.7373	0.94835	1	1	7870	tags=36%, list=36%, signal=57%
SAGIV_CD24_TARGETS_UP	20	-0.258398	-0.737023	0.81717	1	1	8590	tags=45%, list=39%, signal=74%
LOPEZ_MESOTHELIOMA_SURVIVAL_WORST_VS_BEST_UP	12	-0.299054	-0.735782	0.826377	1	1	302	tags=8%, list=1%, signal=8%
LANDIS_ERBB2_BREAST_TUMORS_65_UP	19	-0.262496	-0.735719	0.821192	1	1	8434	tags=42%, list=39%, signal=68%
GARGALOVIC_RESPONSE_TO_OXIDIZED_PHOSPHOLIPIDS_LIGHTYELLOW_UP	9	-0.328123	-0.735287	0.818692	1	1	1595	tags=11%, list=7%, signal=12%
GAZDA_DIAMOND_BLACKFAN_ANEMIA_ERYTHROID_DN	342	-0.1626	-0.735086	0.994019	1	1	3011	tags=11%, list=14%, signal=13%
MARKEY_RB1_ACUTE_LOF_DN	190	-0.172119	-0.734622	0.985175	1	1	827	tags=4%, list=4%, signal=4%
SHEPARD_BMYB_MORPHOLINO_UP	158	-0.17826	-0.734157	0.966216	1	1	5818	tags=24%, list=27%, signal=33%
GAZDA_DIAMOND_BLACKFAN_ANEMIA_PROGENITOR_DN	50	-0.213421	-0.733053	0.875969	1	1	6545	tags=32%, list=30%, signal=46%
IZADPANAH_STEM_CELL_ADIPOSE_VS_BONE_UP	90	-0.189917	-0.732619	0.947598	1	1	2363	tags=10%, list=11%, signal=11%
FIGUEROA_AML_METHYLATION_CLUSTER_6_UP	101	-0.187876	-0.732481	0.932081	1	1	2331	tags=11%, list=11%, signal=12%
HU_ANGIOGENESIS_DN	28	-0.238402	-0.731729	0.864238	1	1	67	tags=4%, list=0%, signal=4%
NIKOLSKY_BREAST_CANCER_1Q32_AMPLICON	11	-0.298406	-0.731702	0.821239	1	1	4228	tags=36%, list=19%, signal=45%
LANDIS_ERBB2_BREAST_PRENEOPLASTIC_UP	16	-0.27221	-0.730055	0.811966	1	1	5942	tags=31%, list=27%, signal=43%
FLECHNER_PBL_KIDNEY_TRANSPLANT_OK_VS_DONOR_UP	125	-0.182745	-0.729859	0.971193	1	1	4061	tags=14%, list=19%, signal=18%
HOLLEMAN_PREDNISOLONE_RESISTANCE_ALL_DN	16	-0.267961	-0.729134	0.836634	1	1	7317	tags=44%, list=33%, signal=66%
BILD_SRC_ONCOGENIC_SIGNATURE	47	-0.213911	-0.728548	0.90625	1	1	6503	tags=30%, list=30%, signal=42%
PUJANA_ATM_PCC_NETWORK	1096	-0.15057	-0.728204	1	1	1	5011	tags=17%, list=23%, signal=21%
WHITEHURST_PACLITAXEL_SENSITIVITY	30	-0.229307	-0.727862	0.878641	1	1	6547	tags=37%, list=30%, signal=52%
MANN_RESPONSE_TO_AMIFOSTINE_UP	20	-0.253822	-0.727729	0.839733	1	1	1953	tags=10%, list=9%, signal=11%
LIU_CMYB_TARGETS_UP	134	-0.17736	-0.727554	0.964286	1	1	6083	tags=31%, list=28%, signal=42%
POTTI_DOCETAXEL_SENSITIVITY	41	-0.219551	-0.727198	0.888712	1	1	4096	tags=20%, list=19%, signal=24%
FIGUEROA_AML_METHYLATION_CLUSTER_7_UP	79	-0.193214	-0.726168	0.930827	1	1	6772	tags=33%, list=31%, signal=47%
DOANE_BREAST_CANCER_CLASSES_DN	30	-0.231384	-0.725953	0.866345	1	1	4087	tags=23%, list=19%, signal=29%
KAMIKUBO_MYELOID_MN1_NETWORK	17	-0.26696	-0.725832	0.84058	1	1	8079	tags=53%, list=37%, signal=84%
LE_EGR2_TARGETS_UP	95	-0.190716	-0.72574	0.937411	1	1	1152	tags=6%, list=5%, signal=7%
RIZKI_TUMOR_INVASIVENESS_3D_UP	169	-0.173923	-0.725691	0.97992	1	1	5819	tags=25%, list=27%, signal=34%
ACEVEDO_LIVER_CANCER_WITH_H3K27ME3_DN	106	-0.183119	-0.725056	0.962132	1	1	4262	tags=20%, list=19%, signal=24%
ZHANG_PROLIFERATING_VS_QUIESCENT	49	-0.209179	-0.724965	0.898928	1	1	912	tags=6%, list=4%, signal=6%
NIKOLSKY_BREAST_CANCER_14Q22_AMPLICON	10	-0.30402	-0.724411	0.818493	1	1	7201	tags=50%, list=33%, signal=74%
GOLDRATH_ANTIGEN_RESPONSE	298	-0.163859	-0.723288	0.991294	1	1	5047	tags=18%, list=23%, signal=23%
KYNG_ENVIRONMENTAL_STRESS_RESPONSE_NOT_BY_GAMMA_IN_WS	27	-0.237544	-0.720718	0.858553	1	1	795	tags=7%, list=4%, signal=8%
YORDY_RECIPROCAL_REGULATION_BY_ETS1_AND_SP100_UP	18	-0.25811	-0.720545	0.841216	1	1	3099	tags=22%, list=14%, signal=26%
OHM_EMBRYONIC_CARCINOMA_DN	7	-0.334048	-0.72047	0.820205	1	1	2439	tags=29%, list=11%, signal=32%
WATANABE_RECTAL_CANCER_RADIOTHERAPY_RESPONSIVE_UP	84	-0.190655	-0.719233	0.945619	1	1	1640	tags=7%, list=7%, signal=8%
MOHANKUMAR_TLX1_TARGETS_UP	335	-0.15984	-0.718153	1	1	1	6797	tags=26%, list=31%, signal=37%
BOYAULT_LIVER_CANCER_SUBCLASS_G6_DN	18	-0.259441	-0.717092	0.865449	1	1	9871	tags=61%, list=45%, signal=111%
PLASARI_TGFB1_TARGETS_1HR_DN	5	-0.366101	-0.716807	0.815081	1	1	790	tags=20%, list=4%, signal=21%
BENPORATH_SOX2_TARGETS	551	-0.15302	-0.716034	1	1	1	6144	tags=24%, list=28%, signal=33%
GRAESSMANN_APOPTOSIS_BY_SERUM_DEPRIVATION_DN	195	-0.169187	-0.715659	0.983418	1	1	6461	tags=29%, list=30%, signal=41%
MULLIGHAN_NPM1_MUTATED_SIGNATURE_1_DN	94	-0.186206	-0.715204	0.955903	1	1	2425	tags=11%, list=11%, signal=12%
BYSTRYKH_HEMATOPOIESIS_STEM_CELL_AND_BRAIN_QTL_CIS	45	-0.207439	-0.714678	0.9136	1	1	9293	tags=49%, list=42%, signal=85%
ZHENG_RESPONSE_TO_ARSENITE_UP	11	-0.300753	-0.714152	0.820168	1	1	3755	tags=27%, list=17%, signal=33%
BLUM_RESPONSE_TO_SALIRASIB_DN	298	-0.16043	-0.713946	0.99514	1	1	5805	tags=18%, list=27%, signal=24%
LINDGREN_BLADDER_CANCER_WITH_LOH_IN_CHR9Q	86	-0.189009	-0.713702	0.953079	1	1	6651	tags=29%, list=30%, signal=42%
TESAR_ALK_TARGETS_EPISC_4D_UP	7	-0.337157	-0.713322	0.818519	1	1	5377	tags=57%, list=25%, signal=76%
BOYLAN_MULTIPLE_MYELOMA_D_DN	60	-0.201161	-0.711802	0.930016	1	1	5158	tags=25%, list=24%, signal=33%
TUOMISTO_TUMOR_SUPPRESSION_BY_COL13A1_DN	16	-0.268378	-0.710427	0.884422	1	1	3409	tags=19%, list=16%, signal=22%
ODONNELL_TARGETS_OF_MYC_AND_TFRC_DN	34	-0.218573	-0.709766	0.916928	1	1	1467	tags=9%, list=7%, signal=9%
NICK_RESPONSE_TO_PROC_TREATMENT_DN	18	-0.255442	-0.709627	0.842546	1	1	6218	tags=39%, list=28%, signal=54%
PICCALUGA_ANGIOIMMUNOBLASTIC_LYMPHOMA_DN	100	-0.18209	-0.708336	0.958689	1	1	8285	tags=37%, list=38%, signal=59%
MARTENS_BOUND_BY_PML_RARA_FUSION	351	-0.156185	-0.707977	0.99881	1	1	6253	tags=27%, list=29%, signal=37%
JIANG_AGING_CEREBRAL_CORTEX_DN	47	-0.207183	-0.707349	0.918712	1	1	6147	tags=19%, list=28%, signal=27%
FIRESTEIN_CTNNB1_PATHWAY	26	-0.236588	-0.707227	0.880952	1	1	7330	tags=46%, list=33%, signal=69%
BROWNE_HCMV_INFECTION_1HR_UP	55	-0.201584	-0.705395	0.934713	1	1	3809	tags=20%, list=17%, signal=24%
BURTON_ADIPOGENESIS_PEAK_AT_8HR	33	-0.220679	-0.705371	0.907295	1	1	3778	tags=18%, list=17%, signal=22%
GAUSSMANN_MLL_AF4_FUSION_TARGETS_B_DN	7	-0.335704	-0.705338	0.814286	1	1	1314	tags=14%, list=6%, signal=15%
SPIRA_SMOKERS_LUNG_CANCER_UP	32	-0.220486	-0.701807	0.920455	1	1	6526	tags=31%, list=30%, signal=44%
MYLLYKANGAS_AMPLIFICATION_HOT_SPOT_12	9	-0.305624	-0.701684	0.840753	1	1	4608	tags=22%, list=21%, signal=28%
FAELT_B_CLL_WITH_VH3_21_DN	42	-0.207927	-0.701375	0.913851	1	1	9321	tags=50%, list=43%, signal=87%
VERRECCHIA_RESPONSE_TO_TGFB1_C4	10	-0.297465	-0.70015	0.849291	1	1	5246	tags=40%, list=24%, signal=53%
KYNG_ENVIRONMENTAL_STRESS_RESPONSE_NOT_BY_GAMMA_IN_OLD	25	-0.23176	-0.700122	0.869637	1	1	795	tags=8%, list=4%, signal=8%
FIRESTEIN_CTNNB1_PATHWAY_AND_PROLIFERATION	6	-0.342571	-0.69928	0.816399	1	1	7174	tags=67%, list=33%, signal=99%
YANAGISAWA_LUNG_CANCER_RECURRENCE	6	-0.341441	-0.697558	0.852459	1	1	3958	tags=17%, list=18%, signal=20%
CHIN_BREAST_CANCER_COPY_NUMBER_UP	23	-0.236383	-0.697308	0.911076	1	1	1370	tags=9%, list=6%, signal=9%
ROVERSI_GLIOMA_COPY_NUMBER_UP	82	-0.184777	-0.696983	0.965204	1	1	5678	tags=24%, list=26%, signal=33%
WONG_ENDOMETRIAL_CANCER_LATE	5	-0.362433	-0.695363	0.82364	1	1	2765	tags=40%, list=13%, signal=46%
MARKS_ACETYLATED_NON_HISTONE_PROTEINS	15	-0.265255	-0.693719	0.868204	1	1	3294	tags=13%, list=15%, signal=16%
BAFNA_MUC4_TARGETS_UP	6	-0.340525	-0.693156	0.841567	1	1	3356	tags=17%, list=15%, signal=20%
BRUNEAU_HEART_GREAT_VESSELS_AND_VALVULOGENESIS	6	-0.34468	-0.692373	0.836237	1	1	5246	tags=50%, list=24%, signal=66%
STARK_PREFRONTAL_CORTEX_22Q11_DELETION_DN	385	-0.151666	-0.692001	1	1	1	5511	tags=17%, list=25%, signal=23%
ONO_AML1_TARGETS_DN	39	-0.208098	-0.691177	0.934295	1	1	6504	tags=38%, list=30%, signal=55%
BOYAULT_LIVER_CANCER_SUBCLASS_G1_DN	30	-0.222901	-0.691148	0.903633	1	1	4648	tags=27%, list=21%, signal=34%
HONMA_DOCETAXEL_RESISTANCE	27	-0.227886	-0.69098	0.892508	1	1	4019	tags=15%, list=18%, signal=18%
RAO_BOUND_BY_SALL4	166	-0.163783	-0.690635	0.99734	1	1	6947	tags=31%, list=32%, signal=46%
IKEDA_MIR1_TARGETS_UP	49	-0.200927	-0.690223	0.932024	1	1	6504	tags=27%, list=30%, signal=38%
IWANAGA_CARCINOGENESIS_BY_KRAS_UP	127	-0.17102	-0.687872	0.983287	1	1	5086	tags=22%, list=23%, signal=29%
DACOSTA_UV_RESPONSE_VIA_ERCC3_TTD_UP	55	-0.193575	-0.687031	0.943368	1	1	4056	tags=18%, list=19%, signal=22%
HEIDENBLAD_AMPLICON_12P11_12_DN	17	-0.257422	-0.686133	0.872305	1	1	3705	tags=24%, list=17%, signal=28%
WANG_HCP_PROSTATE_CANCER	83	-0.181063	-0.684654	0.972222	1	1	7087	tags=35%, list=32%, signal=51%
LIU_VMYB_TARGETS_UP	108	-0.173425	-0.683767	0.977369	1	1	5846	tags=28%, list=27%, signal=38%
MULLIGHAN_NPM1_SIGNATURE_3_UP	256	-0.155529	-0.683371	0.996245	1	1	4012	tags=15%, list=18%, signal=18%
TAYLOR_METHYLATED_IN_ACUTE_LYMPHOBLASTIC_LEUKEMIA	57	-0.191696	-0.678918	0.959184	1	1	6005	tags=26%, list=27%, signal=36%
LASTOWSKA_NEUROBLASTOMA_COPY_NUMBER_DN	579	-0.145007	-0.678377	1	1	1	5836	tags=21%, list=27%, signal=28%
TESAR_JAK_TARGETS_MOUSE_ES_D3_DN	9	-0.29737	-0.677527	0.867725	1	1	2367	tags=22%, list=11%, signal=25%
SOUCEK_MYC_TARGETS	7	-0.321107	-0.677174	0.884746	1	1	4162	tags=29%, list=19%, signal=35%
BARRIER_COLON_CANCER_RECURRENCE_DN	16	-0.256745	-0.676978	0.89913	1	1	3738	tags=19%, list=17%, signal=23%
SINGH_NFE2L2_TARGETS	12	-0.27508	-0.676655	0.872881	1	1	4575	tags=25%, list=21%, signal=32%
EHLERS_ANEUPLOIDY_DN	8	-0.304007	-0.675531	0.847273	1	1	4014	tags=25%, list=18%, signal=31%
NIKOLSKY_MUTATED_AND_AMPLIFIED_IN_BREAST_CANCER	62	-0.185508	-0.674116	0.963134	1	1	4486	tags=19%, list=20%, signal=24%
VANOEVELEN_MYOGENESIS_SIN3A_TARGETS	160	-0.163821	-0.674012	0.997297	1	1	3675	tags=14%, list=17%, signal=16%
DISTECHE_ESCAPED_FROM_X_INACTIVATION	8	-0.303244	-0.673147	0.864528	1	1	10013	tags=63%, list=46%, signal=115%
MYLLYKANGAS_AMPLIFICATION_HOT_SPOT_9	7	-0.310943	-0.672137	0.877408	1	1	10392	tags=86%, list=47%, signal=163%
PILON_KLF1_TARGETS_DN	1480	-0.138363	-0.670412	1	1	1	5548	tags=19%, list=25%, signal=24%
SCHEIDEREIT_IKK_TARGETS	15	-0.250875	-0.670057	0.893761	1	1	2241	tags=13%, list=10%, signal=15%
KORKOLA_TERATOMA_UP	12	-0.271379	-0.669563	0.889078	1	1	6440	tags=42%, list=29%, signal=59%
MORI_EMU_MYC_LYMPHOMA_BY_ONSET_TIME_UP	77	-0.180665	-0.668548	0.97741	1	1	2970	tags=10%, list=14%, signal=12%
MMS_MOUSE_LYMPH_HIGH_4HRS_UP	34	-0.20832	-0.668512	0.931994	1	1	7685	tags=35%, list=35%, signal=54%
MYLLYKANGAS_AMPLIFICATION_HOT_SPOT_22	8	-0.309518	-0.667987	0.897059	1	1	477	tags=13%, list=2%, signal=13%
IIZUKA_LIVER_CANCER_PROGRESSION_L0_L1_DN	15	-0.254663	-0.66658	0.912811	1	1	16321	tags=100%, list=75%, signal=393%
FRASOR_RESPONSE_TO_SERM_OR_FULVESTRANT_UP	17	-0.246345	-0.665976	0.902521	1	1	6762	tags=35%, list=31%, signal=51%
LE_NEURONAL_DIFFERENTIATION_DN	19	-0.238897	-0.665608	0.9141	1	1	5729	tags=37%, list=26%, signal=50%
APRELIKOVA_BRCA1_TARGETS	44	-0.197506	-0.665519	0.950151	1	1	2710	tags=11%, list=12%, signal=13%
VANTVEER_BREAST_CANCER_METASTASIS_DN	92	-0.173385	-0.664877	0.990043	1	1	1676	tags=7%, list=8%, signal=7%
MANN_RESPONSE_TO_AMIFOSTINE_DN	8	-0.291087	-0.664797	0.874113	1	1	8612	tags=50%, list=39%, signal=82%
WHITFIELD_CELL_CYCLE_G2_M	172	-0.156833	-0.6647	0.995833	1	1	1098	tags=5%, list=5%, signal=5%
SHIN_B_CELL_LYMPHOMA_CLUSTER_5	16	-0.247282	-0.663801	0.907051	1	1	3707	tags=25%, list=17%, signal=30%
PALOMERO_GSI_SENSITIVITY_UP	7	-0.30432	-0.66371	0.875874	1	1	6064	tags=43%, list=28%, signal=59%
WANG_RESPONSE_TO_PACLITAXEL_VIA_MAPK8_DN	5	-0.336654	-0.662957	0.88117	1	1	14524	tags=100%, list=66%, signal=297%
JOHANSSON_GLIOMAGENESIS_BY_PDGFB_UP	43	-0.195411	-0.662898	0.952527	1	1	2866	tags=12%, list=13%, signal=13%
WU_HBX_TARGETS_1_UP	12	-0.264523	-0.6622	0.885382	1	1	2397	tags=17%, list=11%, signal=19%
MA_MYELOID_DIFFERENTIATION_UP	38	-0.200206	-0.661514	0.95952	1	1	6972	tags=29%, list=32%, signal=42%
UEDA_PERIFERAL_CLOCK	136	-0.163919	-0.661398	0.993289	1	1	4895	tags=19%, list=22%, signal=24%
AMIT_SERUM_RESPONSE_40_MCF10A	26	-0.216753	-0.658729	0.934932	1	1	4321	tags=23%, list=20%, signal=29%
WILSON_PROTEASES_AT_TUMOR_BONE_INTERFACE_DN	5	-0.345838	-0.658223	0.88225	1	1	14323	tags=100%, list=65%, signal=289%
CHUANG_OXIDATIVE_STRESS_RESPONSE_DN	9	-0.288404	-0.657414	0.893048	1	1	7060	tags=44%, list=32%, signal=66%
ZHANG_ADIPOGENESIS_BY_BMP7	11	-0.271361	-0.65736	0.90604	1	1	462	tags=9%, list=2%, signal=9%
HEIDENBLAD_AMPLIFIED_IN_SOFT_TISSUE_CANCER	11	-0.270594	-0.656992	0.889273	1	1	8924	tags=55%, list=41%, signal=92%
PETRETTO_HEART_MASS_QTL_CIS_DN	17	-0.240388	-0.655363	0.896607	1	1	5861	tags=35%, list=27%, signal=48%
HOLLEMAN_ASPARAGINASE_RESISTANCE_ALL_UP	16	-0.242781	-0.654166	0.918367	1	1	7936	tags=31%, list=36%, signal=49%
INGRAM_SHH_TARGETS	7	-0.306572	-0.653644	0.878092	1	1	2045	tags=29%, list=9%, signal=32%
MACLACHLAN_BRCA1_TARGETS_UP	18	-0.236371	-0.65288	0.90312	1	1	1004	tags=11%, list=5%, signal=12%
TOOKER_GEMCITABINE_RESISTANCE_UP	63	-0.180465	-0.652043	0.970451	1	1	3127	tags=13%, list=14%, signal=15%
HUMMEL_BURKITTS_LYMPHOMA_DN	13	-0.260856	-0.65195	0.905316	1	1	16185	tags=100%, list=74%, signal=383%
MATZUK_SPERMATOCYTE	63	-0.180634	-0.651864	0.970992	1	1	5840	tags=25%, list=27%, signal=35%
SPIELMAN_LYMPHOBLAST_EUROPEAN_VS_ASIAN_UP	401	-0.143082	-0.65185	1	1	1	5825	tags=19%, list=27%, signal=25%
LU_TUMOR_ANGIOGENESIS_UP	22	-0.224547	-0.64791	0.935484	1	1	3748	tags=23%, list=17%, signal=27%
MOOTHA_PYR	7	-0.305145	-0.646296	0.891344	1	1	7345	tags=43%, list=34%, signal=64%
YIH_RESPONSE_TO_ARSENITE_C3	31	-0.20752	-0.646104	0.9408	1	1	2439	tags=13%, list=11%, signal=15%
MALIK_REPRESSED_BY_ESTROGEN	12	-0.260732	-0.645261	0.891753	1	1	5104	tags=25%, list=23%, signal=33%
JIANG_AGING_HYPOTHALAMUS_UP	40	-0.194179	-0.644699	0.972265	1	1	5955	tags=25%, list=27%, signal=34%
WANG_LMO4_TARGETS_DN	254	-0.145845	-0.643211	1	1	1	2884	tags=10%, list=13%, signal=12%
CHUNG_BLISTER_CYTOTOXICITY_DN	28	-0.206392	-0.642677	0.942339	1	1	7111	tags=32%, list=32%, signal=48%
KIM_ALL_DISORDERS_OLIGODENDROCYTE_NUMBER_CORR_UP	622	-0.137338	-0.64134	1	1	1	2420	tags=8%, list=11%, signal=8%
SLEBOS_HEAD_AND_NECK_CANCER_WITH_HPV_UP	62	-0.177342	-0.640106	0.979228	1	1	4402	tags=16%, list=20%, signal=20%
DANG_MYC_TARGETS_DN	30	-0.203986	-0.638916	0.953411	1	1	1784	tags=10%, list=8%, signal=11%
ZHONG_RESPONSE_TO_AZACITIDINE_AND_TSA_DN	46	-0.185508	-0.638091	0.968254	1	1	8187	tags=41%, list=37%, signal=66%
DACOSTA_UV_RESPONSE_VIA_ERCC3_UP	257	-0.145134	-0.638061	1	1	1	4056	tags=14%, list=19%, signal=17%
ZEMBUTSU_SENSITIVITY_TO_METHOTREXATE	12	-0.255208	-0.637049	0.925249	1	1	1734	tags=17%, list=8%, signal=18%
BANDRES_RESPONSE_TO_CARMUSTIN_WITHOUT_MGMT_24HR_DN	8	-0.289951	-0.636592	0.884752	1	1	15547	tags=100%, list=71%, signal=345%
CHIANG_LIVER_CANCER_SUBCLASS_PROLIFERATION_UP	141	-0.155194	-0.636575	0.99589	1	1	5732	tags=21%, list=26%, signal=28%
LIU_SOX4_TARGETS_DN	237	-0.145732	-0.636428	0.997351	1	1	6951	tags=29%, list=32%, signal=42%
DAVIES_MULTIPLE_MYELOMA_VS_MGUS_DN	23	-0.218671	-0.636399	0.923567	1	1	6401	tags=30%, list=29%, signal=43%
BRACHAT_RESPONSE_TO_CISPLATIN	17	-0.235636	-0.634429	0.933884	1	1	6861	tags=47%, list=31%, signal=68%
NEMETH_INFLAMMATORY_RESPONSE_LPS_UP	80	-0.168474	-0.633155	0.989706	1	1	4407	tags=20%, list=20%, signal=25%
NGO_MALIGNANT_GLIOMA_1P_LOH	13	-0.246053	-0.631355	0.923469	1	1	746	tags=8%, list=3%, signal=8%
KUROZUMI_RESPONSE_TO_ONCOCYTIC_VIRUS_AND_CYCLIC_RGD	18	-0.228008	-0.630343	0.925734	1	1	4846	tags=33%, list=22%, signal=43%
WANG_TUMOR_INVASIVENESS_UP	303	-0.141032	-0.628406	1	1	1	3637	tags=10%, list=17%, signal=12%
CHAUHAN_RESPONSE_TO_METHOXYESTRADIOL_DN	87	-0.165747	-0.628024	0.991643	1	1	6083	tags=22%, list=28%, signal=30%
MEISSNER_ES_ICP_WITH_H3K4ME3	20	-0.222233	-0.627307	0.936877	1	1	4362	tags=25%, list=20%, signal=31%
RICKMAN_METASTASIS_UP	224	-0.144585	-0.626403	1	1	1	6204	tags=24%, list=28%, signal=33%
IWANAGA_E2F1_TARGETS_INDUCED_BY_SERUM	21	-0.22376	-0.626351	0.955738	1	1	6844	tags=38%, list=31%, signal=55%
BRUNEAU_SEPTATION_VENTRICULAR	10	-0.259448	-0.62606	0.916388	1	1	6549	tags=40%, list=30%, signal=57%
RAMASWAMY_METASTASIS_UP	47	-0.183426	-0.625154	0.980153	1	1	8456	tags=38%, list=39%, signal=62%
WIKMAN_ASBESTOS_LUNG_CANCER_UP	16	-0.233098	-0.623784	0.936644	1	1	5443	tags=31%, list=25%, signal=42%
HE_PTEN_TARGETS_DN	5	-0.323762	-0.622183	0.903166	1	1	4541	tags=40%, list=21%, signal=50%
CAFFAREL_RESPONSE_TO_THC_8HR_5_UP	11	-0.255625	-0.621711	0.912892	1	1	945	tags=9%, list=4%, signal=9%
SAKAI_CHRONIC_HEPATITIS_VS_LIVER_CANCER_UP	68	-0.168562	-0.621195	0.983557	1	1	5787	tags=19%, list=26%, signal=26%
HUNSBERGER_EXERCISE_REGULATED_GENES	29	-0.203174	-0.621015	0.958466	1	1	6658	tags=28%, list=30%, signal=40%
NEWMAN_ERCC6_TARGETS_DN	27	-0.205914	-0.620822	0.945902	1	1	8370	tags=59%, list=38%, signal=96%
SHAFFER_IRF4_TARGETS_IN_ACTIVATED_DENDRITIC_CELL	58	-0.174246	-0.620198	0.982222	1	1	8299	tags=43%, list=38%, signal=69%
KORKOLA_YOLK_SAC_TUMOR_UP	16	-0.234165	-0.618434	0.937815	1	1	4902	tags=31%, list=22%, signal=40%
COURTOIS_SENESCENCE_TRIGGERS	6	-0.300206	-0.613454	0.920578	1	1	9133	tags=67%, list=42%, signal=114%
HORIUCHI_WTAP_TARGETS_DN	244	-0.140151	-0.609453	1	1	1	4397	tags=12%, list=20%, signal=15%
GARGALOVIC_RESPONSE_TO_OXIDIZED_PHOSPHOLIPIDS_MAGENTA_UP	19	-0.223985	-0.607728	0.951747	1	1	2628	tags=16%, list=12%, signal=18%
[truncated: 95 more rows]
