# Supplementary material for: RUNX1, a transcription factor mutated in breast cancer, controls the fate of ER-positive mammary luminal cells
Source: eLife journal article supplement (doi:10.7554/elife.03881), 2014-11-21
Supplement: supp [file elife_poa_e03881_Figure_4_source_data_3.xlsx]

## Sheet: gsea_report_for_ko_135321338899
Figure 4-Source data 3: Gene sets from the MSigDB database C2-CP:KEGG (KEGG gene sets, v3.1) enriched in Runx1-null luminal cells
Enrichment scores with FDR q-val≤0.25 are significant in GSEA, based on Subramanian et al. PNAS 2005
NAME	SIZE	ES	NES	NOM p-val	FDR q-val	FWER p-val	RANK AT MAX	LEADING EDGE
KEGG_AMINOACYL_TRNA_BIOSYNTHESIS	29	0.692108	2.33909	0	0	0	1757	tags=38%, list=8%, signal=41%
KEGG_STEROID_BIOSYNTHESIS	15	0.649614	1.87646	0.0171569	0.0318282	0.08	2189	tags=47%, list=10%, signal=52%
KEGG_VALINE_LEUCINE_AND_ISOLEUCINE_BIOSYNTHESIS	10	0.663759	1.69716	0.0154639	0.117863	0.374	1757	tags=40%, list=8%, signal=43%
KEGG_DNA_REPLICATION	32	0.457971	1.56402	0.0128205	0.256714	0.759	7101	tags=63%, list=32%, signal=92%
KEGG_P53_SIGNALING_PATHWAY	60	0.393458	1.56217	0.00882353	0.208893	0.765	5088	tags=40%, list=23%, signal=52%
KEGG_HOMOLOGOUS_RECOMBINATION	24	0.463265	1.51189	0.0452128	0.239692	0.866	6970	tags=63%, list=32%, signal=92%
KEGG_GLYOXYLATE_AND_DICARBOXYLATE_METABOLISM	12	0.50925	1.32799	0.117207	0.62718	0.998	2544	tags=33%, list=12%, signal=38%
KEGG_BLADDER_CANCER	37	0.369567	1.32456	0.0913838	0.561747	0.998	2267	tags=22%, list=10%, signal=24%
KEGG_HYPERTROPHIC_CARDIOMYOPATHY_HCM	79	0.298006	1.23269	0.103226	0.841179	1	1032	tags=13%, list=5%, signal=13%
KEGG_ARRHYTHMOGENIC_RIGHT_VENTRICULAR_CARDIOMYOPATHY_ARVC	71	0.292865	1.20786	0.121951	0.859033	1	901	tags=13%, list=4%, signal=13%
KEGG_RIBOSOME	69	0.296414	1.19264	0.162651	0.841658	1	12227	tags=97%, list=56%, signal=219%
KEGG_PENTOSE_PHOSPHATE_PATHWAY	23	0.372862	1.15526	0.267717	0.931485	1	1743	tags=22%, list=8%, signal=24%
KEGG_O_GLYCAN_BIOSYNTHESIS	26	0.351741	1.14778	0.262774	0.890668	1	989	tags=15%, list=5%, signal=16%
KEGG_SPLICEOSOME	85	0.273872	1.14506	0.210884	0.837835	1	7203	tags=45%, list=33%, signal=66%
KEGG_ONE_CARBON_POOL_BY_FOLATE	15	0.40932	1.13722	0.298795	0.81145	1	2363	tags=33%, list=11%, signal=37%
KEGG_DILATED_CARDIOMYOPATHY	86	0.268129	1.12728	0.209836	0.799297	1	1032	tags=12%, list=5%, signal=12%
KEGG_N_GLYCAN_BIOSYNTHESIS	40	0.30969	1.11497	0.266319	0.796753	1	1691	tags=13%, list=8%, signal=14%
KEGG_LINOLEIC_ACID_METABOLISM	18	0.374902	1.10712	0.278177	0.780517	1	3449	tags=33%, list=16%, signal=40%
KEGG_MISMATCH_REPAIR	22	0.341152	1.05985	0.337838	0.921549	1	7778	tags=59%, list=36%, signal=92%
KEGG_CYTOKINE_CYTOKINE_RECEPTOR_INTERACTION	202	0.219046	1.05589	0.308036	0.89032	1	3517	tags=22%, list=16%, signal=26%
KEGG_CARDIAC_MUSCLE_CONTRACTION	65	0.251854	1.00498	0.418367	1	1	1766	tags=14%, list=8%, signal=15%
KEGG_CELL_CYCLE	111	0.228895	0.994325	0.466192	1	1	6257	tags=34%, list=29%, signal=48%
KEGG_ALPHA_LINOLENIC_ACID_METABOLISM	18	0.335025	0.9906	0.437346	1	1	3449	tags=33%, list=16%, signal=40%
KEGG_GLYCEROPHOSPHOLIPID_METABOLISM	66	0.245426	0.987032	0.458204	0.983418	1	3449	tags=24%, list=16%, signal=29%
KEGG_NEUROTROPHIN_SIGNALING_PATHWAY	115	0.22136	0.980787	0.488372	0.967814	1	4895	tags=25%, list=22%, signal=32%
KEGG_MAPK_SIGNALING_PATHWAY	244	0.202303	0.980109	0.550265	0.933138	1	4909	tags=27%, list=22%, signal=35%
KEGG_BASAL_TRANSCRIPTION_FACTORS	31	0.286011	0.963761	0.5	0.955199	1	861	tags=10%, list=4%, signal=10%
KEGG_GLYCINE_SERINE_AND_THREONINE_METABOLISM	25	0.291387	0.94873	0.517241	0.972199	1	1681	tags=20%, list=8%, signal=22%
KEGG_CYSTEINE_AND_METHIONINE_METABOLISM	30	0.279333	0.947165	0.514512	0.943589	1	3772	tags=30%, list=17%, signal=36%
KEGG_RNA_POLYMERASE	25	0.285799	0.937039	0.543081	0.945118	1	1854	tags=16%, list=8%, signal=17%
KEGG_GLYCOSAMINOGLYCAN_BIOSYNTHESIS_CHONDROITIN_SULFATE	12	0.347367	0.930773	0.569048	0.935755	1	3057	tags=25%, list=14%, signal=29%
KEGG_ARACHIDONIC_ACID_METABOLISM	42	0.24713	0.913199	0.612359	0.961055	1	2722	tags=21%, list=12%, signal=24%
KEGG_OLFACTORY_TRANSDUCTION	26	0.281388	0.902121	0.580402	0.964245	1	5778	tags=46%, list=26%, signal=63%
KEGG_TERPENOID_BACKBONE_BIOSYNTHESIS	14	0.320932	0.892694	0.602906	0.963787	1	3397	tags=21%, list=16%, signal=25%
KEGG_ANTIGEN_PROCESSING_AND_PRESENTATION	44	0.242552	0.887542	0.673352	0.950848	1	7719	tags=52%, list=35%, signal=81%
KEGG_PYRIMIDINE_METABOLISM	86	0.201189	0.852333	0.823171	1	1	5745	tags=33%, list=26%, signal=44%
KEGG_BASE_EXCISION_REPAIR	31	0.248342	0.843348	0.724518	1	1	7648	tags=58%, list=35%, signal=89%
KEGG_ERBB_SIGNALING_PATHWAY	83	0.192635	0.821989	0.859813	1	1	2510	tags=14%, list=11%, signal=16%
KEGG_GLIOMA	60	0.206269	0.801016	0.847095	1	1	2334	tags=15%, list=11%, signal=17%
KEGG_RNA_DEGRADATION	50	0.211398	0.799888	0.860399	1	1	5339	tags=32%, list=24%, signal=42%
KEGG_GNRH_SIGNALING_PATHWAY	94	0.189027	0.786473	0.902098	1	1	3449	tags=21%, list=16%, signal=25%
KEGG_SELENOAMINO_ACID_METABOLISM	20	0.256957	0.780232	0.784974	1	1	1681	tags=15%, list=8%, signal=16%
KEGG_VIRAL_MYOCARDITIS	44	0.206699	0.769455	0.837535	0.998909	1	4881	tags=32%, list=22%, signal=41%
KEGG_CHRONIC_MYELOID_LEUKEMIA	72	0.190708	0.766423	0.92068	0.980835	1	5707	tags=32%, list=26%, signal=43%
KEGG_RIG_I_LIKE_RECEPTOR_SIGNALING_PATHWAY	52	0.190199	0.713275	0.935933	1	1	6820	tags=38%, list=31%, signal=56%
KEGG_RIBOFLAVIN_METABOLISM	15	0.24796	0.68999	0.869359	1	1	3320	tags=20%, list=15%, signal=24%
KEGG_LYSINE_DEGRADATION	42	0.175429	0.647361	0.980822	1	1	2049	tags=12%, list=9%, signal=13%
KEGG_PATHOGENIC_ESCHERICHIA_COLI_INFECTION	41	0.173846	0.628258	0.997175	1	1	5571	tags=24%, list=25%, signal=33%
KEGG_REGULATION_OF_AUTOPHAGY	24	0.184568	0.593282	0.964103	1	1	403	tags=4%, list=2%, signal=4%
KEGG_PROTEIN_EXPORT	20	0.126574	0.386606	1	0.999822	1	3550	tags=15%, list=16%, signal=18%
