# Supplementary material for: RUNX1, a transcription factor mutated in breast cancer, controls the fate of ER-positive mammary luminal cells
Source: eLife journal article supplement (doi:10.7554/elife.03881), 2014-11-21
Supplement: supp [file elife_poa_e03881_Figure_6_source_data_1.xlsx]

## Sheet: Sheet1
Figure 6-Source data 1: Gene sets from Cited1 knockout females
Based on GSEA MSigDB C2 collection. Original reference: Howlin et al, Oncogene 25:1532-42
HOWLIN_CITED1_TARGETS_1_DN	HOWLIN_CITED1_TARGETS_1_UP	HOWLIN_CITED1_TARGETS_2_DN	HOWLIN_CITED1_TARGETS_2_UP
> Genes down-regulated in mammary glands from the CITED1 knockout mice: homozygotic vs. heterozygotic animals.	> Genes up-regulated in mammary glands from the CITED1 knockout mice: homozygotic vs. heterozygotic animals.	> Genes down-regulated in mammary glands from the CITED1 knockout mice: homozygotic vs wild type (WT) animals.	> Genes up-regulated in mammary glands from the CITED1 knockout mice: homozygotic vs wild type (WT) animals.
ABCB7	AIF1L	AMACR	C12orf35
AMACR	ARHGAP9	BID	DYNLT1
ANGEL2	C12orf35	BPGM	FBXO32
AR	CBX5	CHRDL1	IFI44
ASPH	CD8A	CITED1	IQGAP1
ATP1A2	CLEC3B	ETF1	KIF18A
BTBD1	CNOT3	FGG	LACTB2
CAP1	CPA5	GALC	MALAT1
CDH11	DDX6	MPZL2	MAP3K7
CITED1	DPP4	PHGDH	MYB
CRYAB	EIF3L	PRKCDBP	NFIA
EPB41L2	FGF23	SLC41A2	SGCG
GALC	GDPD3	SORL1	SMARCA4
HGF	GPC3	STC2	SPRR1A
HIF1A	HAL	TMEM45B	TRIM27
IDO1	IL1R2	TRIM34	UCP1
IER5	IL6R	VAMP3	XIST
JAK1	JAK1
LIN7C	KCNK1
MPP5	KIF5B
MPZL2	KRT85
NR1D2	MALAT1
OBFC2A	MBP
PDGFD	MLF1
RAB6B	NR2F2
RAD51AP1	PANK3
RNF14	RBFOX2
SC5DL	RBM5
SERINC1	SAMHD1
SLC25A24	SNCA
SYT13	TMEM100
TFRC	TMEM194B
THBS1	XIST
TMEM30B	ZBTB20
TRIM34	ZNF689
UAP1
VPS53
