# Supplementary figures and images for: RUNX1, a transcription factor mutated in breast cancer, controls the fate of ER-positive mammary luminal cells
Source: eLife journal article supplement (doi:10.7554/elife.03881), 2014-11-21

# A

## ER+ LPs (CD49b+Sca1+)

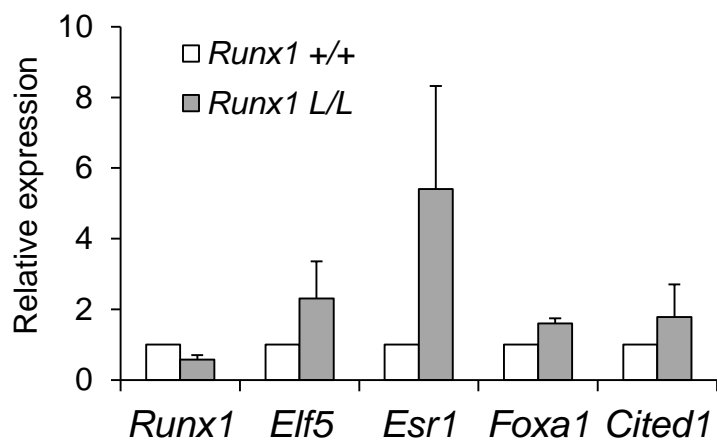

# B

## ER- LPs (CD49b+Sca1-)

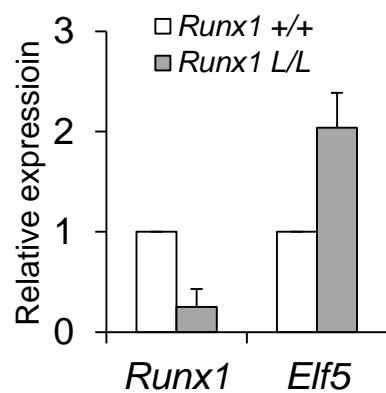

## LPs (CD14+c-Kit+)

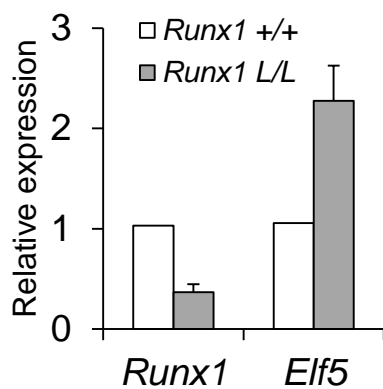

## Basal MECs

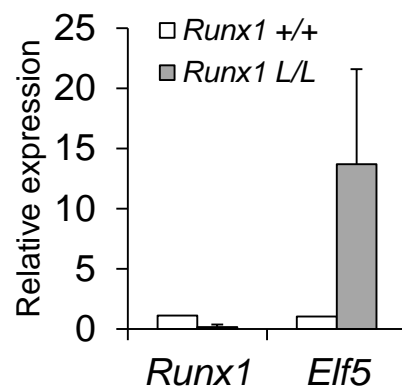

# C

## ER- LPs (CD49b+Sca1-)

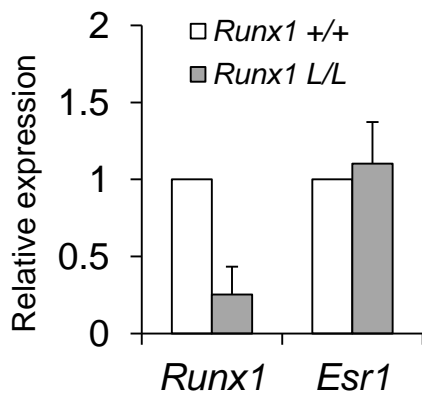

## LPs (CD14+c-Kit+)

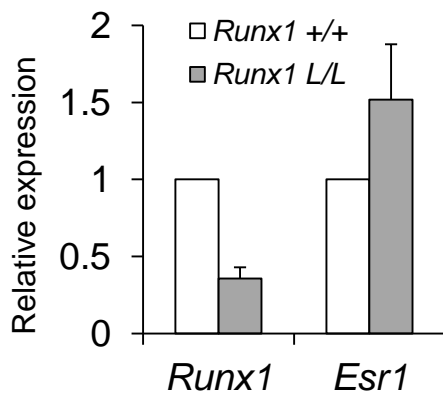

## Basal MECs

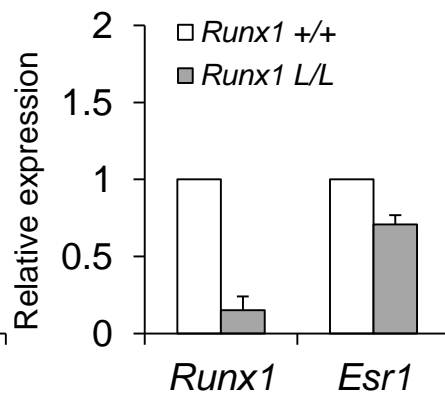

Supplement: supp [file elife-03881-supp-v1.zip]

**A**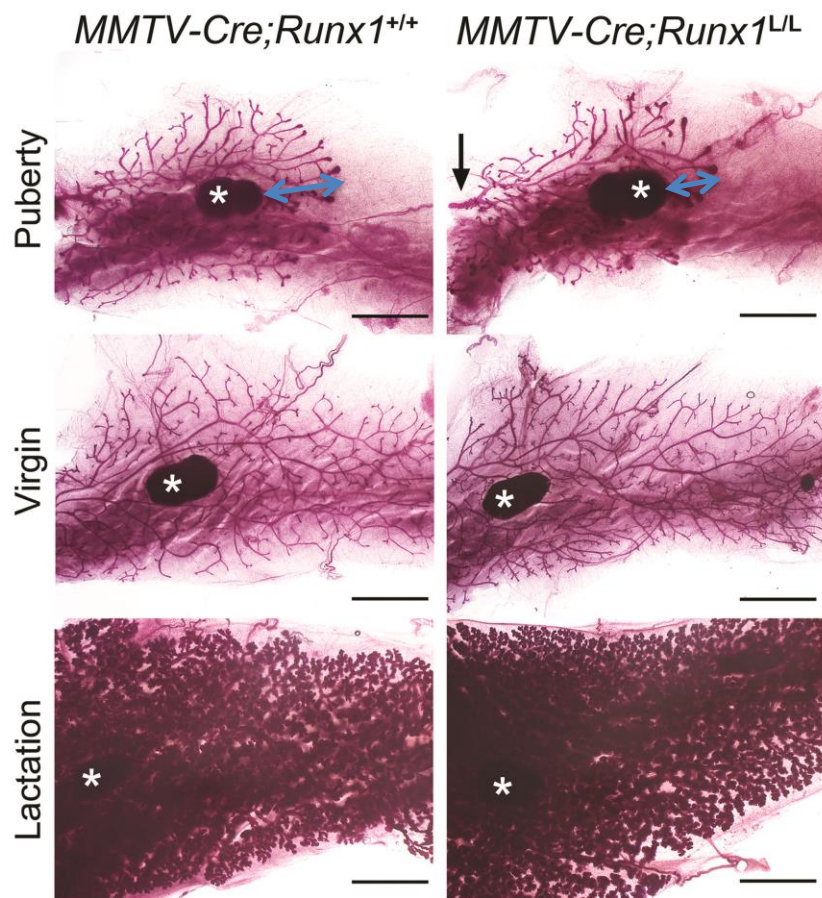**B**

| <i>Cre</i>  | <i>Runx1</i> | # of litters | # of pups born | # of pups weaned | % of pups weaned |
|-------------|--------------|--------------|----------------|------------------|------------------|
| <i>MMTV</i> | <i>L/+</i>   | 8            | 59             | 58               | 98.3             |
| <i>MMTV</i> | <i>L/L</i>   | 7            | 43             | 0                | 0                |

**C**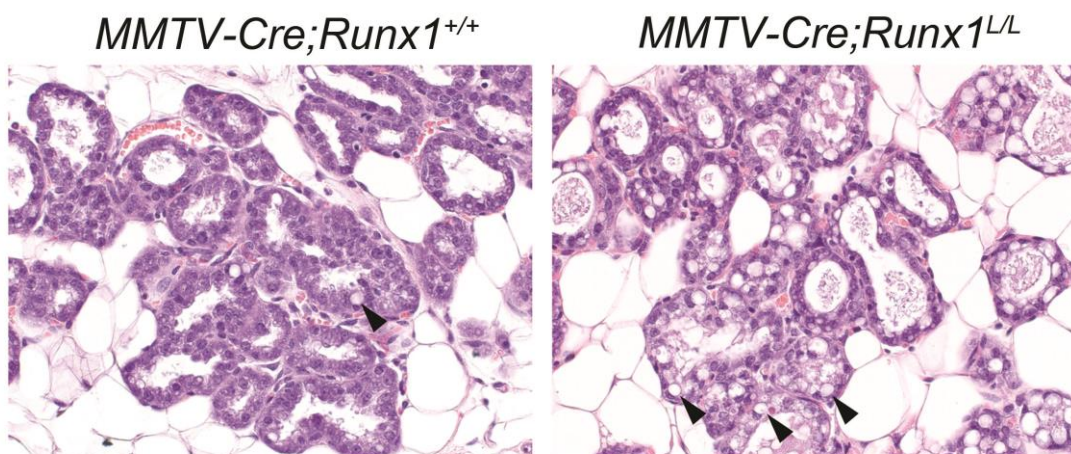

Supplement: supp [file elife-03881-supp-v1.zip]

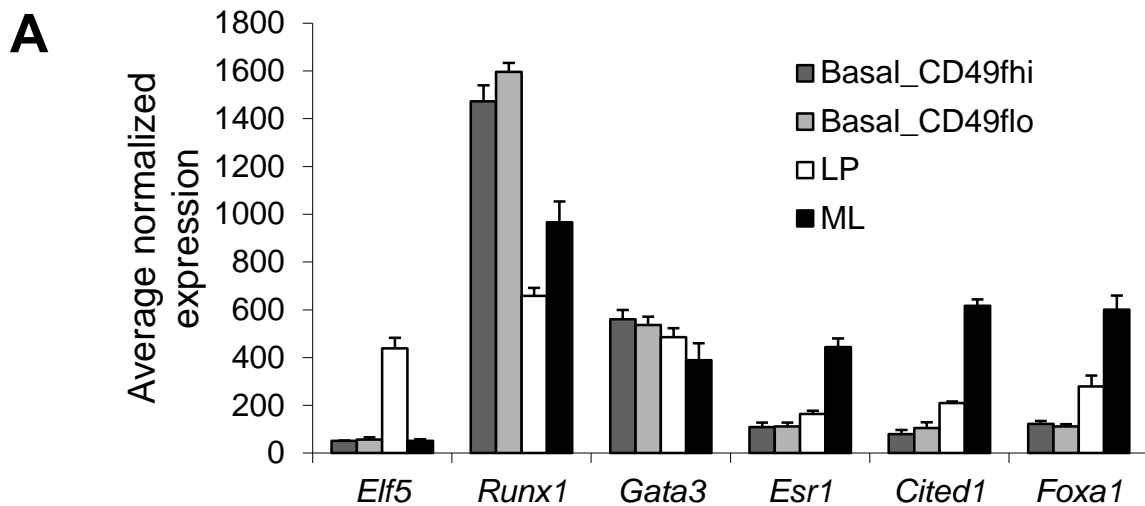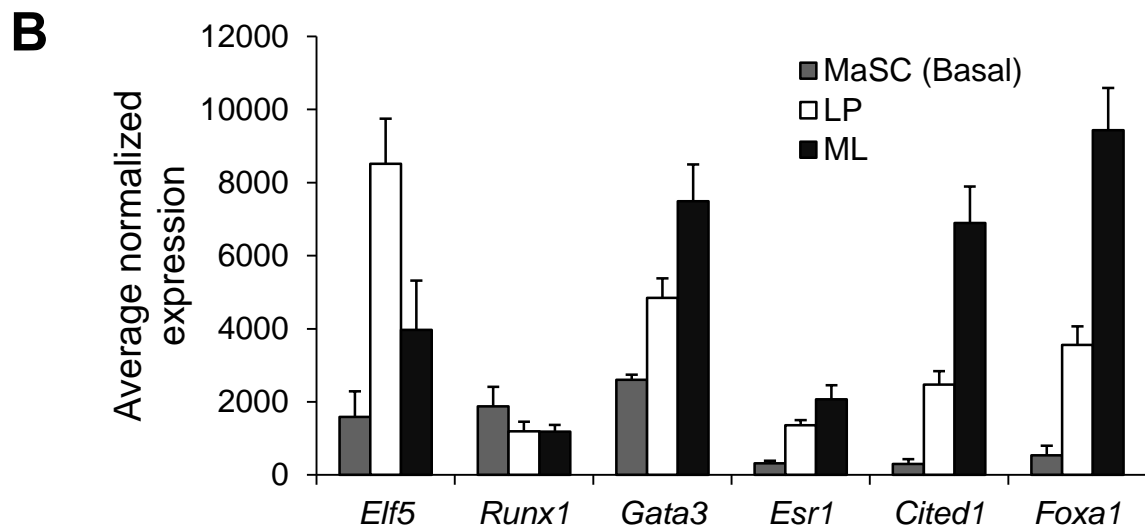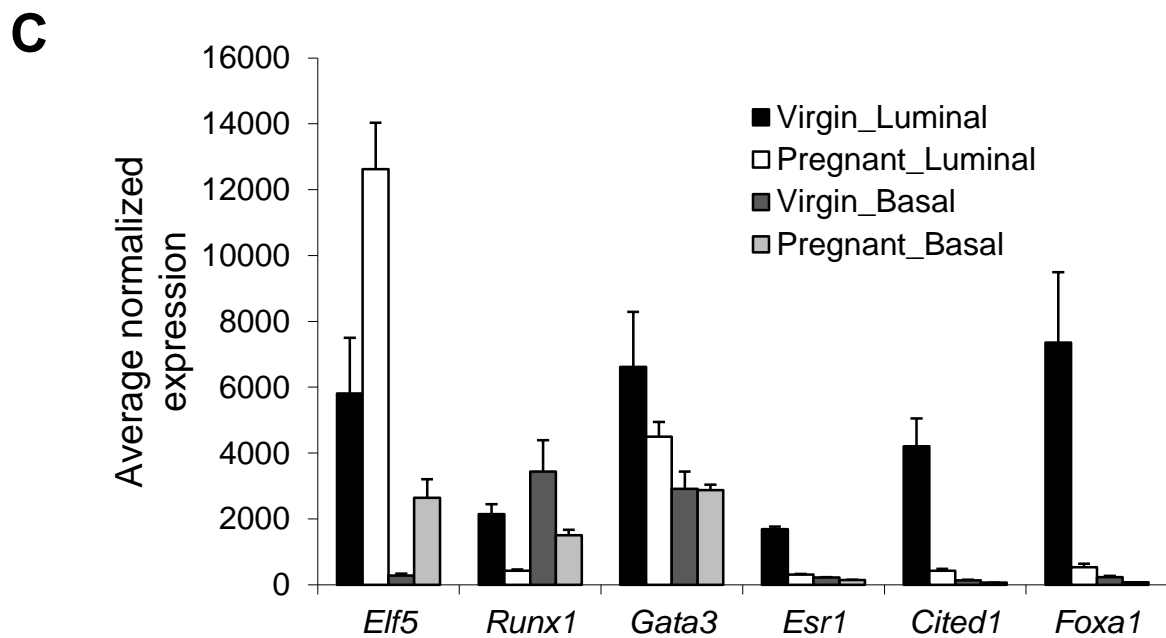

Supplement: supp [file elife-03881-supp-v1.zip › elife_poa_e03881_Figure_1_figure_supplement_1.pdf]

**A**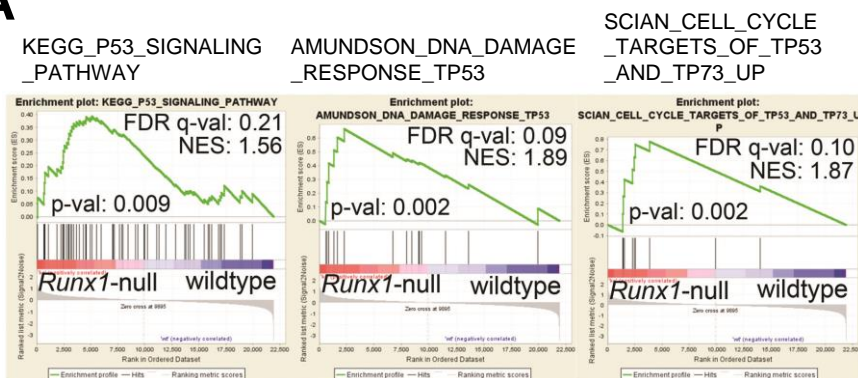**B**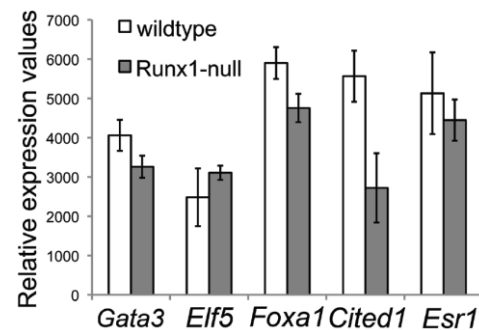**C**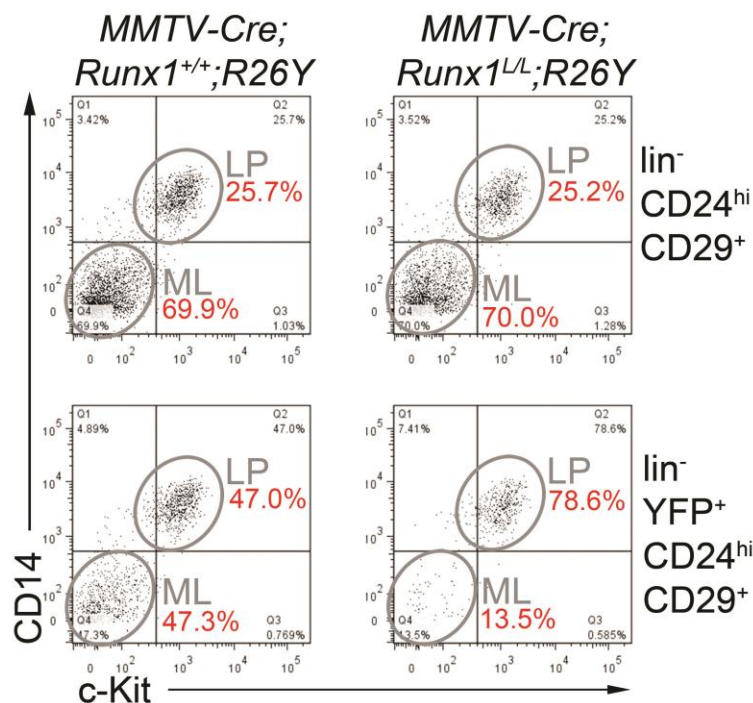**D**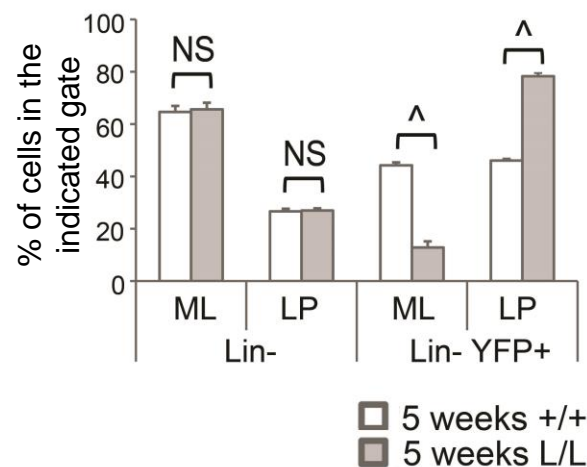**E**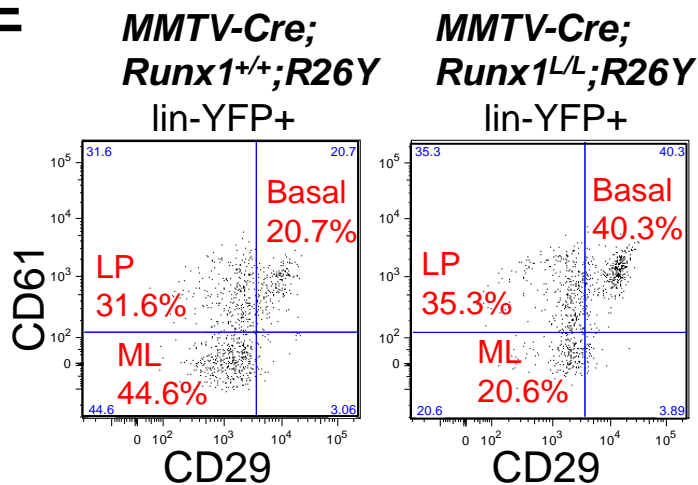**F**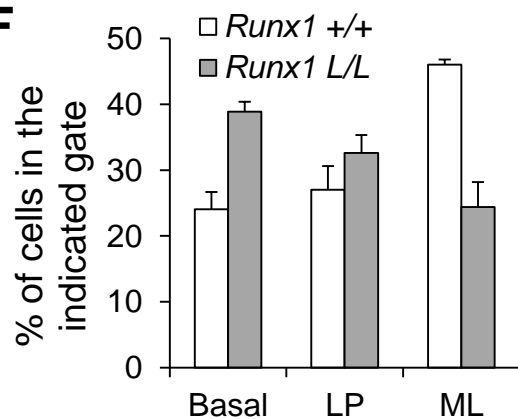**G**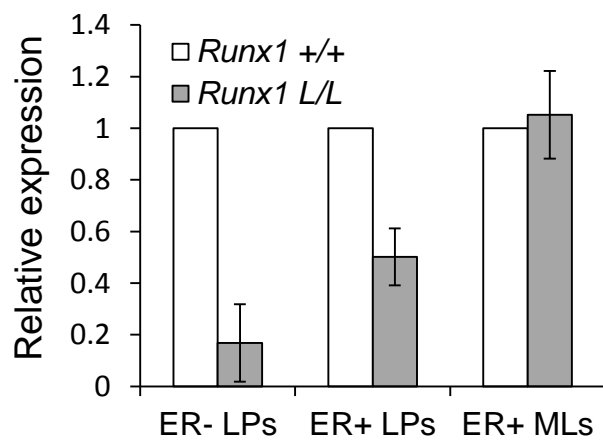

Supplement: supp [file elife-03881-supp-v1.zip › elife_poa_e03881_Figure_4_figure_supplement_1.pdf]

**A**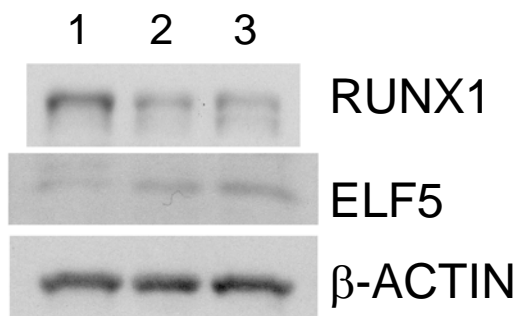

1. Uninduced
2. - EGF
3. + Prolactin

**B**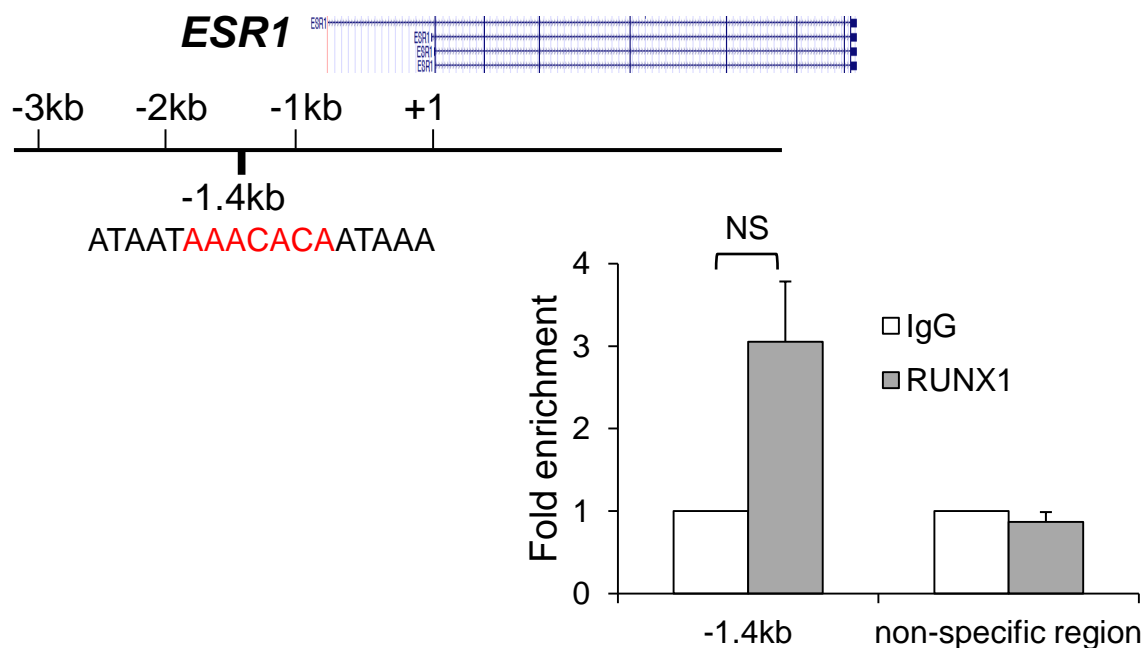**C**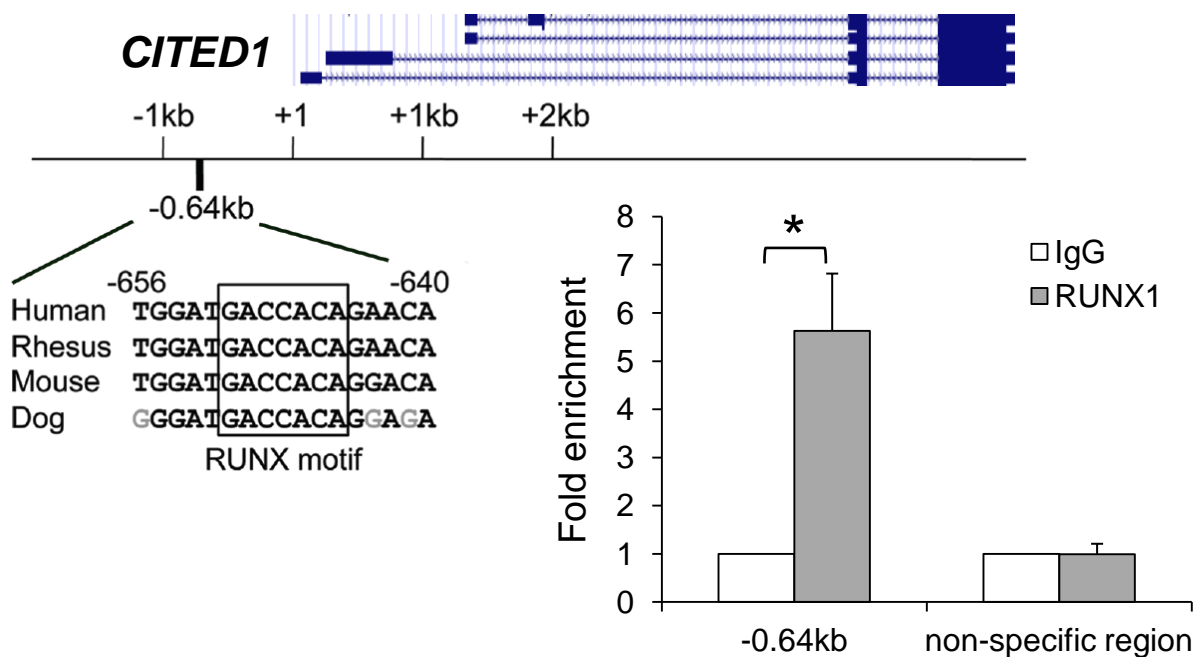

Supplement: supp [file elife-03881-supp-v1.zip › elife_poa_e03881_Figure_6_figure_supplement_1.pdf]

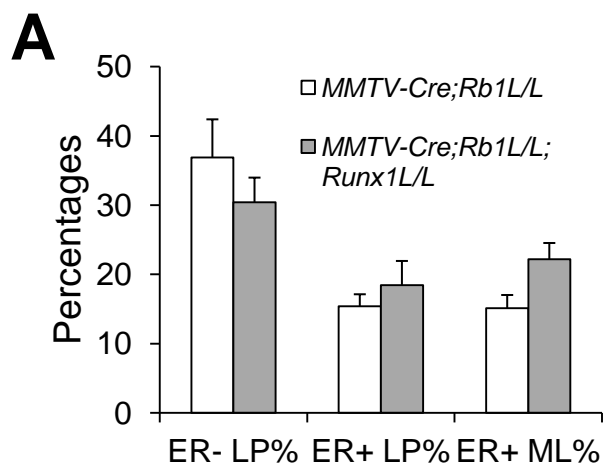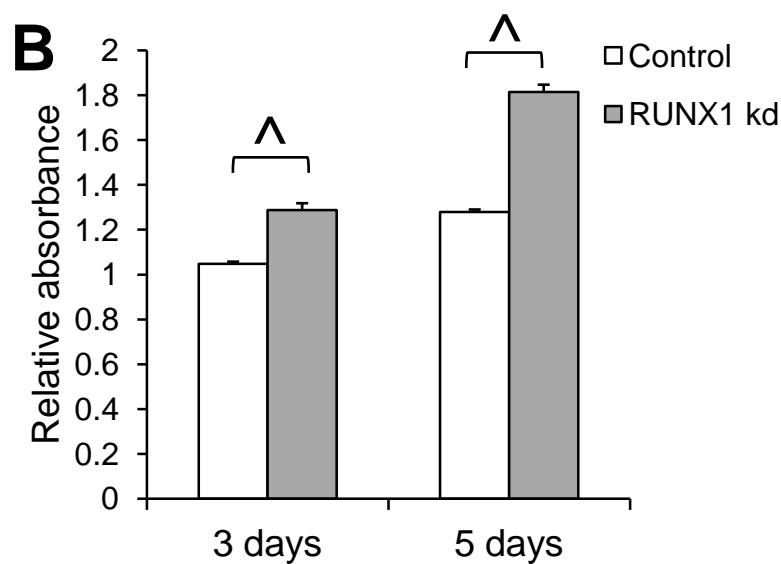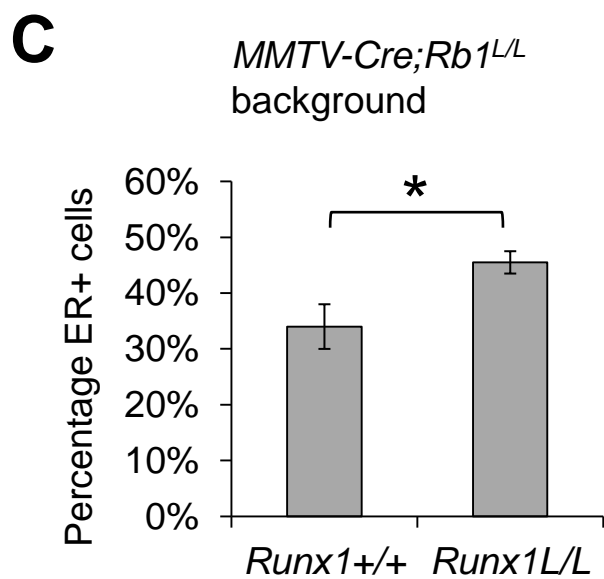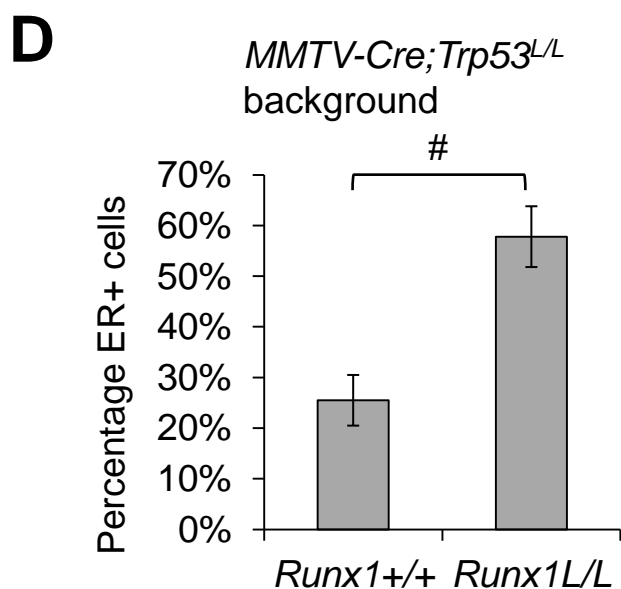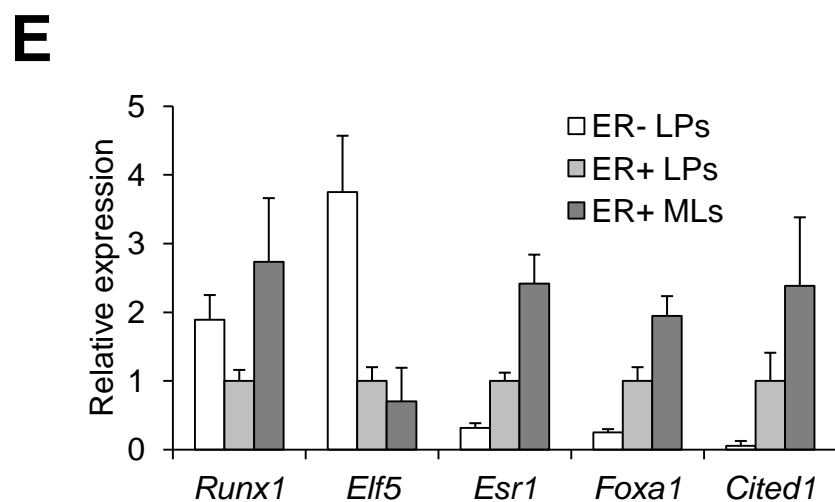

Supplement: supp [file elife-03881-supp-v1.zip › elife_poa_e03881_Figure_7_figure_supplement_2.pdf]
